# Supplementary material for: Design and fabrication of intermetallic NiCo electrocatalysts for the alkaline HER
Source: Royal Society of Chemistry journal article supplement (doi:10.1039/d4nr02519a), 2024-01-01
Supplement: d4nr02519a1.xlsx [file d4nr02519a1.xlsx]

## Sheet: Fig.1
H2O dissociation						H adsorption
	Ni	order-NiCo	disorder-NiCo				Ni	order-NiCo	disorder-NiCo
X	Y	Y	Y			X	Y	Y	Y
1	0	0	0			1	0	0	0
2	0	0	0			2	0	0	0
3	0.706	0.508	0.655			3	-0.708	-0.537	-0.628
4	0.706	0.508	0.655			4	-0.708	-0.537	-0.628
5	-0.637	-0.464	-0.528			5	0	0	0
6	-0.637	-0.464	-0.528			6	0	0	0

## Sheet: Fig.2
Ni-3d								Co-3d
order-NiCo		disorder-NiCo		Ni				order-NiCo		disorder-NiCo
X	Y	X	Y	X	Y			X	Y	X	Y
-10.9504	110	-10.9885	-45	-10.6642	0			-10.9504	55	-10.9885	0
-10.8837	110	-10.9218	-45	-10.5975	0			-10.8837	55	-10.9218	0
-10.8171	110	-10.8552	-45	-10.5309	0			-10.8171	55	-10.8552	0
-10.7504	110	-10.7885	-45	-10.4642	0			-10.7504	55	-10.7885	0
-10.6837	110	-10.7218	-45	-10.3975	0			-10.6837	55	-10.7218	0
-10.6171	110	-10.6552	-45	-10.3309	0			-10.6171	55	-10.6552	0
-10.5504	110	-10.5885	-45	-10.2642	0			-10.5504	55	-10.5885	0
-10.4837	110	-10.5218	-45	-10.1975	0			-10.4837	55	-10.5218	0
-10.4171	110	-10.4552	-45	-10.1309	0			-10.4171	55	-10.4552	0
-10.3504	110	-10.3885	-45	-10.0642	0			-10.3504	55	-10.3885	0
-10.2837	110	-10.3218	-45	-9.99748	0			-10.2837	55	-10.3218	0
-10.2171	110	-10.2552	-45	-9.93088	0			-10.2171	55	-10.2552	0
-10.1504	110	-10.1885	-45	-9.86418	0			-10.1504	55	-10.1885	0
-10.0837	110	-10.1218	-45	-9.79748	0			-10.0837	55	-10.1218	0
-10.0171	110	-10.0552	-45	-9.73088	0			-10.0171	55	-10.0552	0
-9.95038	110	-9.98846	-45	-9.66418	-0.000261176			-9.95038	55	-9.98846	0
-9.88368	110	-9.92176	-45	-9.59748	-0.000325882			-9.88368	55	-9.92176	0
-9.81708	110	-9.85516	-45	-9.53088	-0.000167602			-9.81708	55	-9.85516	0
-9.75038	110	-9.78846	-45	-9.46418	0.000124525			-9.75038	55	-9.78846	0
-9.68368	110	-9.72176	-45.0002	-9.39748	0.000747602			-9.68368	55	-9.72176	-0.000141176
-9.61708	110	-9.65516	-45.0002	-9.33088	0.00118			-9.61708	54.9997	-9.65516	-0.000150588
-9.55038	110	-9.58846	-45.0001	-9.26418	0.00142			-9.55038	54.9997	-9.58846	-5.10407e-05
-9.48368	110	-9.52176	-44.9999	-9.19748	0.00169			-9.48368	54.9999	-9.52176	0.000109412
-9.41708	110	-9.45516	-44.9995	-9.13088	0.00259			-9.41708	55.0002	-9.45516	0.000388959
-9.35038	110.001	-9.38846	-44.9993	-9.06418	0.00314			-9.35038	55.0005	-9.38846	0.00048552
-9.28368	110.001	-9.32176	-44.9991	-8.99748	0.00282			-9.28368	55.0009	-9.32176	0.000558462
-9.21708	110.002	-9.25516	-44.999	-8.93088	0.00313			-9.21708	55.0014	-9.25516	0.000659367
-9.15038	110.002	-9.18846	-44.9985	-8.86418	0.00358			-9.15038	55.0017	-9.18846	0.00114
-9.08368	110.004	-9.12176	-44.9981	-8.79748	0.00411			-9.08368	55.0027	-9.12176	0.00149
-9.01708	110.004	-9.05516	-44.9979	-8.73088	0.0039			-9.01708	55.0024	-9.05516	0.00165
-8.95038	110.005	-8.98846	-44.9978	-8.66418	0.00465			-8.95038	55.0039	-8.98846	0.00182
-8.88368	110.006	-8.92176	-44.9976	-8.59748	0.0063			-8.88368	55.0046	-8.92176	0.00206
-8.81708	110.007	-8.85516	-44.9974	-8.53088	0.00788			-8.81708	55.0054	-8.85516	0.00232
-8.75038	110.008	-8.78846	-44.9978	-8.46418	0.00954			-8.75038	55.0063	-8.78846	0.00185
-8.68368	110.007	-8.72176	-44.9972	-8.39748	0.01019			-8.68368	55.0057	-8.72176	0.00253
-8.61708	110.008	-8.65516	-44.9963	-8.33088	0.00706			-8.61708	55.0071	-8.65516	0.00341
-8.55038	110.01	-8.58846	-44.9955	-8.26418	0.01372			-8.55038	55.0084	-8.58846	0.00432
-8.48368	110.011	-8.52176	-44.9946	-8.19748	0.02216			-8.48368	55.0097	-8.52176	0.00531
-8.41708	110.012	-8.45516	-44.9946	-8.13088	0.02825			-8.41708	55.0107	-8.45516	0.00549
-8.35038	110.01	-8.38846	-44.9945	-8.06418	0.0339			-8.35038	55.0099	-8.38846	0.00589
-8.28368	110.014	-8.32176	-44.9927	-7.99748	0.03802			-8.28368	55.013	-8.32176	0.00766
-8.21708	110.019	-8.25516	-44.9884	-7.93088	0.05176			-8.21708	55.0165	-8.25516	0.01149
-8.15038	110.024	-8.18846	-44.9856	-7.86418	0.07339			-8.15038	55.0208	-8.18846	0.01381
-8.08368	110.03	-8.12176	-44.9826	-7.79748	0.08974			-8.08368	55.0257	-8.12176	0.01637
-8.01708	110.031	-8.05516	-44.9842	-7.73088	0.10191			-8.01708	55.0262	-8.05516	0.01524
-7.95038	110.03	-7.98846	-44.9737	-7.66418	0.10441			-7.95038	55.0244	-7.98846	0.02476
-7.88368	110.037	-7.92176	-44.9595	-7.59748	0.1034			-7.88368	55.0303	-7.92176	0.03649
-7.81708	110.044	-7.85516	-44.9486	-7.53088	0.12228			-7.81708	55.0358	-7.85516	0.0456
-7.75038	110.052	-7.78846	-44.9404	-7.46418	0.12563			-7.75038	55.043	-7.78846	0.0524
-7.68368	110.058	-7.72176	-44.9376	-7.39748	0.11838			-7.68368	55.0479	-7.72176	0.05452
-7.61708	110.068	-7.65516	-44.9369	-7.33088	0.16133			-7.61708	55.0573	-7.65516	0.05574
-7.55038	110.081	-7.58846	-44.9249	-7.26418	0.18315			-7.55038	55.0708	-7.58846	0.06832
-7.48368	110.089	-7.52176	-44.9283	-7.19748	0.16623			-7.48368	55.0795	-7.52176	0.06658
-7.41708	110.082	-7.45516	-44.9181	-7.13088	0.1681			-7.41708	55.073	-7.45516	0.07823
-7.35038	110.094	-7.38846	-44.8993	-7.06418	0.15414			-7.35038	55.0854	-7.38846	0.0962
-7.28368	110.121	-7.32176	-44.8872	-6.99748	0.2128			-7.28368	55.1157	-7.32176	0.10846
-7.21708	110.121	-7.25516	-44.9003	-6.93088	0.27168			-7.21708	55.1157	-7.25516	0.09649
-7.15038	110.113	-7.18846	-44.9015	-6.86418	0.30748			-7.15038	55.1074	-7.18846	0.0964
-7.08368	110.137	-7.12176	-44.8902	-6.79748	0.30011			-7.08368	55.1412	-7.12176	0.10668
-7.01708	110.153	-7.05516	-44.8663	-6.73088	0.27691			-7.01708	55.1642	-7.05516	0.12893
-6.95038	110.174	-6.98846	-44.8475	-6.66418	0.33574			-6.95038	55.1916	-6.98846	0.14712
-6.88368	110.191	-6.92176	-44.846	-6.59748	0.42778			-6.88368	55.2156	-6.92176	0.14958
-6.81708	110.2	-6.85516	-44.8723	-6.53088	0.47252			-6.81708	55.2288	-6.85516	0.12576
-6.75038	110.196	-6.78846	-44.8487	-6.46418	0.53662			-6.75038	55.227	-6.78846	0.14802
-6.68368	110.201	-6.72176	-44.8175	-6.39748	0.62853			-6.68368	55.238	-6.72176	0.17918
-6.61708	110.183	-6.65516	-44.7852	-6.33088	0.65015			-6.61708	55.2213	-6.65516	0.21091
-6.55038	110.196	-6.58846	-44.7528	-6.26418	0.72156			-6.55038	55.2429	-6.58846	0.24701
-6.48368	110.201	-6.52176	-44.6994	-6.19748	0.80395			-6.48368	55.2542	-6.52176	0.30474
-6.41708	110.201	-6.45516	-44.6919	-6.13088	0.79068			-6.41708	55.2473	-6.45516	0.30912
-6.35038	110.256	-6.38846	-44.6228	-6.06418	0.91806			-6.35038	55.322	-6.38846	0.39268
-6.28368	110.272	-6.32176	-44.5688	-5.99748	0.98553			-6.28368	55.3445	-6.32176	0.4635
-6.21708	110.346	-6.25516	-44.5269	-5.93088	1.12179			-6.21708	55.4408	-6.25516	0.51477
-6.15038	110.431	-6.18846	-44.5341	-5.86418	1.17289			-6.15038	55.5514	-6.18846	0.50601
-6.08368	110.479	-6.12176	-44.4636	-5.79748	1.15603			-6.08368	55.6168	-6.12176	0.59154
-6.01708	110.538	-6.05516	-44.3058	-5.73088	0.74692			-6.01708	55.6961	-6.05516	0.79411
-5.95038	110.62	-5.98846	-44.2924	-5.66418	1.18123			-5.95038	55.8133	-5.98846	0.80855
-5.88368	110.659	-5.92176	-44.2157	-5.59748	1.57164			-5.88368	55.8756	-5.92176	0.84129
-5.81708	110.576	-5.85516	-43.9909	-5.53088	1.57346			-5.81708	55.7319	-5.85516	1.22214
-5.75038	110.544	-5.78846	-43.8328	-5.46418	3.20896			-5.75038	55.7015	-5.78846	1.60979
-5.68368	110.6	-5.72176	-43.7596	-5.39748	4.71388			-5.68368	55.8484	-5.72176	2.10654
-5.61708	111.22	-5.65516	-43.3767	-5.33088	6.69257			-5.61708	56.9017	-5.65516	2.54261
-5.55038	111.854	-5.58846	-42.6972	-5.26418	7.93463			-5.55038	57.9708	-5.58846	3.17509
-5.48368	112.566	-5.52176	-42.4048	-5.19748	9.14385			-5.48368	59.0695	-5.52176	3.47228
-5.41708	113.276	-5.45516	-41.4344	-5.13088	10.2405			-5.41708	60.1604	-5.45516	4.27244
-5.35038	113.846	-5.38846	-40.9103	-5.06418	9.84592			-5.35038	61.0369	-5.38846	4.61069
-5.28368	114.515	-5.32176	-40.3826	-4.99748	10.8097			-5.28368	62.0915	-5.32176	4.89766
-5.21708	114.585	-5.25516	-39.7802	-4.93088	11.6203			-5.21708	62.3404	-5.25516	5.73388
-5.15038	114.838	-5.18846	-39.3686	-4.86418	12.2788			-5.15038	62.7033	-5.18846	6.14409
-5.08368	115.669	-5.12176	-38.6955	-4.79748	13.8373			-5.08368	63.7767	-5.12176	6.91727
-5.01708	116.145	-5.05516	-38.4042	-4.73088	15.0298			-5.01708	64.3463	-5.05516	7.68771
-4.95038	116.8	-4.98846	-37.0432	-4.66418	16.8043			-4.95038	65.1042	-4.98846	9.13159
-4.88368	117.188	-4.92176	-35.6609	-4.59748	18.9772			-4.88368	65.4491	-4.92176	10.7933
-4.81708	117.953	-4.85516	-34.1112	-4.53088	19.8286			-4.81708	66.3201	-4.85516	12.3224
-4.75038	118.75	-4.78846	-33.1857	-4.46418	22.9169			-4.75038	67.3028	-4.78846	13.1291
-4.68368	119.6	-4.72176	-31.6219	-4.39748	26.5902			-4.68368	68.5274	-4.72176	14.1533
-4.61708	120.382	-4.65516	-30.2008	-4.33088	26.9706			-4.61708	69.5955	-4.65516	14.9542
-4.55038	120.443	-4.58846	-29.528	-4.26418	25.5562			-4.55038	69.71	-4.58846	15.0488
-4.48368	121.08	-4.52176	-28.8676	-4.19748	26.6151			-4.48368	70.4287	-4.52176	15.5715
-4.41708	122.283	-4.45516	-29.8056	-4.13088	26.0402			-4.41708	71.5401	-4.45516	14.5254
-4.35038	123.54	-4.38846	-30.6389	-4.06418	26.8291			-4.35038	72.6409	-4.38846	13.8164
-4.28368	123.9	-4.32176	-31.6168	-3.99748	28.62			-4.28368	72.5069	-4.32176	13.2393
-4.21708	124.595	-4.25516	-32.596	-3.93088	29.0794			-4.21708	72.802	-4.25516	12.5345
-4.15038	124.847	-4.18846	-32.9086	-3.86418	29.2762			-4.15038	72.6582	-4.18846	12.773
-4.08368	124.37	-4.12176	-32.9508	-3.79748	29.3531			-4.08368	71.6941	-4.12176	13.4531
-4.01708	123.93	-4.05516	-32.3623	-3.73088	30.4036			-4.01708	70.7977	-4.05516	14.1372
-3.95038	124.04	-3.98846	-32.1592	-3.66418	30.45			-3.95038	70.6143	-3.98846	14.4846
-3.88368	124.554	-3.92176	-31.4442	-3.59748	28.6694			-3.88368	70.9023	-3.92176	15.1246
-3.81708	124.572	-3.85516	-31.9647	-3.53088	29.7388			-3.81708	70.6465	-3.85516	14.2212
-3.75038	124.274	-3.78846	-31.7734	-3.46418	29.2958			-3.75038	70.2165	-3.78846	14.4363
-3.68368	124.362	-3.72176	-30.7335	-3.39748	25.8253			-3.68368	70.284	-3.72176	15.3908
-3.61708	123.83	-3.65516	-31.2132	-3.33088	23.477			-3.61708	69.6084	-3.65516	14.8925
-3.55038	124.609	-3.58846	-32.7527	-3.26418	24.5761			-3.55038	70.572	-3.58846	13.6483
-3.48368	126.367	-3.52176	-32.3599	-3.19748	23.3349			-3.48368	72.3012	-3.52176	14.1509
-3.41708	126.952	-3.45516	-31.6261	-3.13088	24.5987			-3.41708	72.9336	-3.45516	14.6724
-3.35038	128.066	-3.38846	-29.7327	-3.06418	27.6711			-3.35038	73.8868	-3.38846	16.1725
-3.28368	128.775	-3.32176	-27.8869	-2.99748	27.4608			-3.28368	74.6171	-3.32176	17.9044
-3.21708	129.505	-3.25516	-26.1281	-2.93088	30.0673			-3.21708	75.3555	-3.25516	19.3521
-3.15038	129.724	-3.18846	-25.2024	-2.86418	33.4779			-3.15038	75.5677	-3.18846	20.2126
-3.08368	130.443	-3.12176	-24.3376	-2.79748	33.5863			-3.08368	76.1692	-3.12176	21.365
-3.01708	132.386	-3.05516	-22.8477	-2.73088	40.3022			-3.01708	78.3129	-3.05516	22.6043
-2.95038	133.787	-2.98846	-21.5042	-2.66418	49.4738			-2.95038	79.7524	-2.98846	24.3931
-2.88368	135.814	-2.92176	-19.7673	-2.59748	54.5502			-2.88368	81.8146	-2.92176	26.1755
-2.81708	136.093	-2.85516	-16.4002	-2.53088	64.8059			-2.81708	82.2784	-2.85516	29.897
-2.75038	135.975	-2.78846	-13.6568	-2.46418	69.8743			-2.75038	82.2922	-2.78846	32.4946
-2.68368	135.63	-2.72176	-12.0382	-2.39748	74.5794			-2.68368	81.9449	-2.72176	33.55
-2.61708	135.074	-2.65516	-10.8067	-2.33088	77.8552			-2.61708	81.4335	-2.65516	34.2158
-2.55038	135.295	-2.58846	-7.65097	-2.26418	76.7871			-2.55038	81.3112	-2.58846	36.7892
-2.48368	134.824	-2.52176	-7.34693	-2.19748	68.4868			-2.48368	80.2904	-2.52176	36.3974
-2.41708	135.279	-2.45516	-8.8797	-2.13088	63.3385			-2.41708	80.1133	-2.45516	34.2832
-2.35038	135.228	-2.38846	-12.7967	-2.06418	58.9773			-2.35038	79.3556	-2.38846	30.1128
-2.28368	135.451	-2.32176	-14.9725	-1.99748	57.0556			-2.28368	78.9152	-2.32176	27.671
-2.21708	135.365	-2.25516	-15.7879	-1.93088	51.2865			-2.21708	77.9555	-2.25516	26.5826
-2.15038	135.046	-2.18846	-16.3461	-1.86418	48.2674			-2.15038	76.8762	-2.18846	25.759
-2.08368	135.616	-2.12176	-17.884	-1.79748	51.8354			-2.08368	77.1774	-2.12176	23.8304
-2.01708	136.068	-2.05516	-19.1191	-1.73088	51.6476			-2.01708	77.512	-2.05516	22.9534
-1.95038	136.233	-1.98846	-20.1281	-1.66418	50.5444			-1.95038	77.8664	-1.98846	22.0529
-1.88368	135.869	-1.92176	-20.7139	-1.59748	53.0174			-1.88368	77.8807	-1.92176	21.5966
-1.81708	134.547	-1.85516	-21.8864	-1.53088	53.2169			-1.81708	77.3348	-1.85516	20.115
-1.75038	135.438	-1.78846	-21.3844	-1.46418	55.7751			-1.75038	78.7582	-1.78846	20.6183
-1.68368	136.299	-1.72176	-21.5478	-1.39748	58.5444			-1.68368	79.9582	-1.72176	20.2675
-1.61708	137.81	-1.65516	-20.4214	-1.33088	55.2887			-1.61708	81.7305	-1.65516	21.6696
-1.55038	138.774	-1.58846	-19.962	-1.26418	52.4325			-1.55038	82.8732	-1.58846	22.3304
-1.48368	140.397	-1.52176	-20.4493	-1.19748	56.3998			-1.48368	84.347	-1.52176	21.9768
-1.41708	142.195	-1.45516	-19.7327	-1.13088	59.5862			-1.41708	85.5691	-1.45516	22.9722
-1.35038	144.253	-1.38846	-16.4016	-1.06418	63.4973			-1.35038	86.7281	-1.38846	26.3065
-1.28368	144.904	-1.32176	-15.2301	-0.99748	68.9047			-1.28368	86.2359	-1.32176	27.633
-1.21708	146.312	-1.25516	-12.371	-0.93088	75.6718			-1.21708	86.2049	-1.25516	30.8512
-1.15038	147.755	-1.18846	-10.88	-0.86418	79.9043			-1.15038	86.5782	-1.18846	32.0728
-1.08368	147.436	-1.12176	-10.5115	-0.79748	81.9348			-1.08368	85.3156	-1.12176	32.794
-1.01708	147.053	-1.05516	-10.0241	-0.73088	83.8219			-1.01708	83.9499	-1.05516	32.7365
-0.95038	148.662	-0.98846	-8.79976	-0.66418	81.3181			-0.95038	84.8996	-0.98846	34.8988
-0.88368	148.517	-0.92176	-6.85057	-0.59748	78.6997			-0.88368	84.8298	-0.92176	37.1345
-0.81708	149.857	-0.85516	-5.54978	-0.53088	72.7379			-0.81708	86.5502	-0.85516	39.0807
-0.75038	149.811	-0.78846	-5.80978	-0.46418	64.6308			-0.75038	87.3173	-0.78846	38.882
-0.68368	149.136	-0.72176	-6.56436	-0.39748	51.9229			-0.68368	87.9284	-0.72176	38.8736
-0.61708	146.984	-0.65516	-8.83333	-0.33088	40.5329			-0.61708	87.1529	-0.65516	36.818
-0.55038	144.219	-0.58846	-13.228	-0.26418	27.0996			-0.55038	85.5873	-0.58846	32.7871
-0.48368	140.131	-0.52176	-18.7994	-0.19748	15.6553			-0.48368	82.6924	-0.52176	27.5107
-0.41708	135.53	-0.45516	-25.3443	-0.13088	8.38206			-0.41708	79.0108	-0.45516	21.2104
-0.35038	129.868	-0.38846	-32.1288	-0.06418	5.29789			-0.35038	74.1951	-0.38846	14.8287
-0.28368	125.826	-0.32176	-35.0656	0.00252	2.99096			-0.28368	70.5858	-0.32176	11.7461
-0.21708	120.63	-0.25516	-39.4868	0.06912	3.07309			-0.21708	65.9096	-0.25516	6.44196
-0.15038	115.903	-0.18846	-43.0617	0.13582	3.9599			-0.15038	61.331	-0.18846	2.61515
-0.08368	113.275	-0.12176	-43.8072	0.20252	4.92618			-0.08368	58.4313	-0.12176	0.96077
-0.01708	112.287	-0.05516	-43.78	0.26912	5.05015			-0.01708	57.3009	-0.05516	1.71034
0.04962	111.185	0.01154	-42.8685	0.33582	4.92052			0.04962	56.2265	0.01154	2.16698
0.11632	110.864	0.07824	-42.7047	0.40252	4.81101			0.11632	56.0462	0.07824	2.17604
0.18292	111.325	0.14484	-42.695	0.46912	4.57761			0.18292	56.4858	0.14484	2.07282
0.24962	112.099	0.21154	-42.7642	0.53582	4.27917			0.24962	57.1985	0.21154	2.2731
0.31632	112.209	0.27824	-42.8186	0.60252	4.25654			0.31632	57.2738	0.27824	2.20988
0.38292	112.183	0.34484	-42.8652	0.66912	4.26238			0.38292	57.2528	0.34484	2.15857
0.44962	112.103	0.41154	-43.0008	0.73582	4.05054			0.44962	57.1871	0.41154	2.02491
0.51632	112.022	0.47824	-43.1375	0.80252	3.88841			0.51632	57.1158	0.47824	1.89022
0.58292	111.994	0.54484	-43.076	0.86912	4.01602			0.58292	57.0998	0.54484	1.96535
0.64962	112.095	0.61154	-43.087	0.93582	4.00457			0.64962	57.2043	0.61154	1.95708
0.71632	112.097	0.67824	-43.1661	1.00252	3.85592			0.71632	57.1988	0.67824	1.87389
0.78292	112.039	0.74484	-43.1589	1.06912	3.68929			0.78292	57.1256	0.74484	1.89166
0.84962	111.926	0.81154	-43.209	1.13582	3.74211			0.84962	56.9969	0.81154	1.85496
0.91632	111.881	0.87824	-43.2306	1.20252	3.52129			0.91632	56.9388	0.87824	1.85211
0.98292	111.734	0.94484	-43.2946	1.26912	3.4561			0.98292	56.7801	0.94484	1.7897
1.04962	111.669	1.01154	-43.2697	1.33582	3.50531			1.04962	56.6986	1.01154	1.81079
1.11632	111.6	1.07824	-43.2828	1.40252	3.34292			1.11632	56.606	1.07824	1.78706
1.18292	111.457	1.14484	-43.3695	1.46912	3.08309			1.18292	56.4324	1.14484	1.69502
1.24962	111.626	1.21154	-43.3535	1.53582	2.79642			1.24962	56.6234	1.21154	1.7198
1.31632	111.704	1.27824	-43.3505	1.60252	2.57888			1.31632	56.7199	1.27824	1.72675
1.38292	111.803	1.34484	-43.3785	1.66912	2.59971			1.38292	56.8428	1.34484	1.7077
1.44962	111.867	1.41154	-43.4418	1.73582	2.73308			1.44962	56.9158	1.41154	1.64715
1.51632	111.937	1.47824	-43.5416	1.80252	2.76536			1.51632	57.0022	1.47824	1.54378
1.58292	111.899	1.54484	-43.6399	1.86912	2.90671			1.58292	56.9692	1.54484	1.44245
1.64962	111.841	1.61154	-43.7811	1.93582	2.95697			1.64962	56.9235	1.61154	1.30197
1.71632	111.799	1.67824	-43.8069	2.00252	3.01202			1.71632	56.8942	1.67824	1.2734
1.78292	111.683	1.74484	-43.7886	2.06912	3.1566			1.78292	56.782	1.74484	1.29775
1.84962	111.55	1.81154	-43.7019	2.13582	3.17313			1.84962	56.6459	1.81154	1.39278
1.91632	111.426	1.87824	-43.6344	2.20252	3.05247			1.91632	56.5233	1.87824	1.46314
1.98292	111.359	1.94484	-43.596	2.26912	2.79655			1.98292	56.4451	1.94484	1.50512
2.04962	111.238	2.01154	-43.6046	2.33582	2.47914			2.04962	56.3059	2.01154	1.49852
2.11632	111.2	2.07824	-43.585	2.40252	2.22271			2.11632	56.2592	2.07824	1.52316
2.18292	111.399	2.14484	-43.6189	2.46912	2.14517			2.18292	56.481	2.14484	1.49525
2.24962	111.369	2.21154	-43.7257	2.53582	2.21851			2.24962	56.4515	2.21154	1.39038
2.31632	111.364	2.27824	-43.8875	2.60252	2.53725			2.31632	56.4491	2.27824	1.2223
2.38292	111.249	2.34484	-44.0571	2.66912	2.71887			2.38292	56.3279	2.34484	1.04072
2.44962	111.2	2.41154	-44.0789	2.73582	2.60534			2.44962	56.2708	2.41154	1.01795
2.51632	111.018	2.47824	-44.0456	2.80252	2.39313			2.51632	56.0789	2.47824	1.0555
2.58292	111.074	2.54484	-43.9799	2.86912	2.22729			2.58292	56.1326	2.54484	1.12174
2.64962	111.139	2.61154	-43.8016	2.93582	2.15403			2.64962	56.1879	2.61154	1.29985
2.71632	111.148	2.67824	-43.7145	3.00252	2.13459			2.71632	56.1867	2.67824	1.39773
2.78292	111.212	2.74484	-43.7049	3.06912	2.0329			2.78292	56.2393	2.74484	1.40985
2.84962	111.319	2.81154	-43.7481	3.13582	1.87501			2.84962	56.3359	2.81154	1.36642
2.91632	111.36	2.87824	-43.8218	3.20252	1.84219			2.91632	56.3627	2.87824	1.28492
2.98292	111.358	2.94484	-43.8503	3.26912	1.90814			2.98292	56.3435	2.94484	1.2485
3.04962	111.334	3.01154	-43.8872	3.33582	2.07782			3.04962	56.3063	3.01154	1.20128
3.11632	111.255	3.07824	-44.0124	3.40252	2.18284			3.11632	56.2182	3.07824	1.06619
3.18292	111.168	3.14484	-44.1234	3.46912	2.26962			3.18292	56.1308	3.14484	0.94396
3.24962	111.091	3.21154	-44.1785	3.53582	2.30359			3.24962	56.0555	3.21154	0.88209
3.31632	110.973	3.27824	-44.1581	3.60252	2.22573			3.31632	55.9404	3.27824	0.90107
3.38292	110.957	3.34484	-44.0498	3.66912	2.03502			3.38292	55.9262	3.34484	1.02073
3.44962	110.861	3.41154	-44.0147	3.73582	1.86666			3.44962	55.8426	3.41154	1.06299
3.51632	110.948	3.47824	-43.9607	3.80252	1.85965			3.51632	55.9374	3.47824	1.12067
3.58292	110.993	3.54484	-43.9331	3.86912	1.78881			3.58292	55.9941	3.54484	1.15215
3.64962	111.017	3.61154	-43.9642	3.93582	1.7743			3.64962	56.0322	3.61154	1.11971
3.71632	111.022	3.67824	-43.9823	4.00252	1.73572			3.71632	56.0459	3.67824	1.1012
3.78292	110.991	3.74484	-44.0197	4.06912	1.78698			3.78292	56.0225	3.74484	1.06029
3.84962	110.953	3.81154	-44.0482	4.13582	1.83623			3.84962	55.994	3.81154	1.02704
3.91632	110.9	3.87824	-44.079	4.20252	1.88997			3.91632	55.9474	3.87824	0.99246
3.98292	110.828	3.94484	-44.1489	4.26912	1.88892			3.98292	55.8793	3.94484	0.91462
4.04962	110.771	4.01154	-44.172	4.33582	1.83473			4.04962	55.8263	4.01154	0.88796
4.11632	110.695	4.07824	-44.1592	4.40252	1.73801			4.11632	55.7507	4.07824	0.89791
4.18292	110.669	4.14484	-44.1021	4.46912	1.68497			4.18292	55.7278	4.14484	0.95676
4.24962	110.661	4.21154	-44.0846	4.53582	1.53829			4.24962	55.7196	4.21154	0.97402
4.31632	110.712	4.27824	-44.0818	4.60252	0.95065			4.31632	55.767	4.27824	0.97558
4.38292	110.757	4.34484	-44.1197	4.66912	1.09015			4.38292	55.8125	4.34484	0.93408
4.44962	110.786	4.41154	-44.1366	4.73582	1.26599			4.44962	55.8348	4.41154	0.91588
4.51632	110.821	4.47824	-44.1824	4.80252	1.4008			4.51632	55.8674	4.47824	0.867
4.58292	110.861	4.54484	-44.2572	4.86912	1.52056			4.58292	55.9065	4.54484	0.7873
4.64962	110.861	4.61154	-44.3148	4.93582	1.58426			4.64962	55.9049	4.61154	0.72749
4.71632	110.855	4.67824	-44.3681	5.00252	1.73763			4.71632	55.9004	4.67824	0.6707
4.78292	110.846	4.74484	-44.4078	5.06912	1.79559			4.78292	55.8946	4.74484	0.62918
4.84962	110.82	4.81154	-44.4518	5.13582	1.80675			4.84962	55.8732	4.81154	0.58242
4.91632	110.783	4.87824	-44.4643	5.20252	1.76925			4.91632	55.8383	4.87824	0.56973
4.98292	110.722	4.94484	-44.4251	5.26912	1.67768			4.98292	55.7782	4.94484	0.61122
5.04962	110.656	5.01154	-44.4002	5.33582	1.48625			5.04962	55.7207	5.01154	0.63899
5.11632	110.673	5.07824	-44.3632	5.40252	1.27627			5.11632	55.7435	5.07824	0.67773
5.18292	110.703	5.14484	-44.3472	5.46912	0.9557			5.18292	55.7737	5.14484	0.69479
5.24962	110.737	5.21154	-44.3548	5.53582	0.59879			5.24962	55.8045	5.21154	0.68693
5.31632	110.759	5.27824	-44.3868	5.60252	0.97489			5.31632	55.8231	5.27824	0.65257
5.38292	110.751	5.34484	-44.4105	5.66912	1.01999			5.38292	55.8068	5.34484	0.62722
5.44962	110.744	5.41154	-44.4489	5.73582	1.05184			5.44962	55.7899	5.41154	0.58776
5.51632	110.769	5.47824	-44.4956	5.80252	1.04836			5.51632	55.8021	5.47824	0.54045
5.58292	110.754	5.54484	-44.5106	5.86912	1.01296			5.58292	55.77	5.54484	0.52722
5.64962	110.729	5.61154	-44.4776	5.93582	1.02572			5.64962	55.7282	5.61154	0.56354
5.71632	110.706	5.67824	-44.4601	6.00252	0.96044			5.71632	55.6895	5.67824	0.58286
5.78292	110.718	5.74484	-44.4562	6.06912	0.99489			5.78292	55.6901	5.74484	0.58748
5.84962	110.692	5.81154	-44.4783	6.13582	1.02149			5.84962	55.655	5.81154	0.56414
5.91632	110.629	5.87824	-44.4882	6.20252	1.02135			5.91632	55.588	5.87824	0.55348
5.98292	110.566	5.94484	-44.5002	6.26912	0.9998			5.98292	55.5298	5.94484	0.53992
6.04962	110.518	6.01154	-44.5151	6.33582	1.01355			6.04962	55.4835	6.01154	0.52198
6.11632	110.436	6.07824	-44.5242	6.40252	1.07158			6.11632	55.4093	6.07824	0.5091
6.18292	110.336	6.14484	-44.5344	6.46912	1.04145			6.18292	55.3173	6.14484	0.4955
6.24962	110.251	6.21154	-44.5345	6.53582	1.10612			6.24962	55.24	6.21154	0.49339
6.31632	110.152	6.27824	-44.5298	6.60252	1.10038			6.31632	55.1485	6.27824	0.49812
6.38292	110.069	6.34484	-44.5212	6.66912	1.04563			6.38292	55.07	6.34484	0.51007
6.44962	110.029	6.41154	-44.5278	6.73582	1.0764			6.44962	55.0312	6.41154	0.50155
6.51632	109.979	6.47824	-44.5484	6.80252	1.12743			6.51632	54.9808	6.47824	0.47802
6.58292	109.951	6.54484	-44.4932	6.86912	1.32829			6.58292	54.9515	6.54484	0.5309
6.64962	109.957	6.61154	-44.4792	6.93582	1.43547			6.64962	54.9584	6.61154	0.5198
6.71632	110	6.67824	-44.4879	7.00252	1.58434			6.71632	55	6.67824	0.5348
6.78292	110	6.74484	-44.4578	7.06912	1.87347			6.78292	55	6.74484	0.60028
6.84962	110	6.81154	-44.4176	7.13582	2.07081			6.84962	55	6.81154	0.67485
6.91632	110	6.87824	-44.4049	7.20252	2.34793			6.91632	55	6.87824	0.71257
6.98292	110	6.94484	-44.4236	7.26912	2.40732			6.98292	55	6.94484	0.70934
7.04962	110	7.01154	-44.4681	7.33582	2.51818			7.04962	55	7.01154	0.67207
7.11632	110	7.07824	-44.5223	7.40252	2.54285			7.11632	55	7.07824	0.61926
7.18292	110	7.14484	-44.594	7.46912	2.5955			7.18292	55	7.14484	0.54157
7.24962	110	7.21154	-44.6921	7.53582	2.54644			7.24962	55	7.21154	0.42864
7.31632	110	7.27824	-44.7912	7.60252	2.5702			7.31632	55	7.27824	0.30749
7.38292	110	7.34484	-44.9053	7.66912	2.60059			7.38292	55	7.34484	0.16024
7.44962	110	7.41154	-44.9912	7.73582	2.62214			7.44962	55	7.41154	0.03934
7.51632	110	7.47824	-45.0025	7.80252	2.64502			7.51632	55	7.47824	-0.00713
7.58292	110	7.54484	-45.0424	7.86912	2.44904			7.58292	55	7.54484	-0.0782
7.64962	110	7.61154	-45.0478	7.93582	2.28506			7.64962	55	7.61154	-0.06079
7.71632	110	7.67824	-45.0092	8.00252	2.18255			7.71632	55	7.67824	-0.01248
7.78292	110	7.74484	-45	8.06912	1.84548			7.78292	55	7.74484	0
7.84962	110	7.81154	-45	8.13582	1.5524			7.84962	55	7.81154	0
7.91632	110	7.87824	-45	8.20252	1.10053			7.91632	55	7.87824	0
7.98292	110	7.94484	-45	8.26912	0.80967			7.98292	55	7.94484	0
8.04962	110	8.01154	-45	8.33582	0.5199			8.04962	55	8.01154	0
8.11632	110	8.07824	-45	8.40252	0.24104			8.11632	55	8.07824	0
8.18292	110	8.14484	-45	8.46912	0.05751			8.18292	55	8.14484	0
8.24962	110	8.21154	-45	8.53582	-0.02603			8.24962	55	8.21154	0
8.31632	110	8.27824	-45	8.60252	-0.10688			8.31632	55	8.27824	0
8.38292	110	8.34484	-45	8.66912	-0.07205			8.38292	55	8.34484	0
8.44962	110	8.41154	-45	8.73582	-0.03531			8.44962	55	8.41154	0
8.51632	110	8.47824	-45	8.80252	-0.01539			8.51632	55	8.47824	0
8.58292	110	8.54484	-45	8.86912	-0.00529			8.58292	55	8.54484	0
8.64962	110	8.61154	-45	8.93582	-0.00662			8.64962	55	8.61154	0
8.71632	110	8.67824	-45	9.00252	-0.00684			8.71632	55	8.67824	0
8.78292	110	8.74484	-45	9.06912	-0.00596			8.78292	55	8.74484	0
8.84962	110	8.81154	-45	9.13582	-0.00397			8.84962	55	8.81154	0
8.91632	110	8.87824	-45	9.20252	-0.000882353			8.91632	55	8.87824	0
8.98292	110	8.94484	-45	9.26912	0.00331			8.98292	55	8.94484	0
9.04962	110	9.01154	-45	9.33582	0.0086			9.04962	55	9.01154	0

## Sheet: Fig.3
Ni-500℃		Ni-780℃			NiCo-500℃		NiCo-780℃
X	Y	X	Y		X	Y	X	Y
20.15	0	20.5	0.02012		20.1	0.06738	20.25	0.07736					lattice/nm
20.17	0	20.52	0.01408		20.12	0.06738	20.27	0.06877						500		780
20.19	0	20.54	0.02213		20.14	0.06738	20.29	0.09456					Ni	0.35226	0.00031351	0.35129	0.00026
20.21	0	20.56	0.01207		20.16	0.06383	20.31	0.07736					NiCo	0.35288	0.00041351	0.35164	0.00031351
20.23	0	20.58	0.0161		20.18	0.07447	20.33	0.07163
20.25	0.01478	20.6	0.0161		20.2	0.08865	20.35	0.07736
20.27	0.00493	20.62	0.02213		20.22	0.08156	20.37	0.08023
20.29	0.0197	20.64	0.02213		20.24	0.07447	20.39	0.06304
20.31	0.04926	20.66	0.01408		20.26	0.05674	20.41	0.06017					grain size
20.33	0.0197	20.68	0.01811		20.28	0.07092	20.43	0.05731						500	780
20.35	0.02956	20.7	0.02213		20.3	0.06028	20.45	0.09456					Ni	32.8	52.6
20.37	0.02463	20.72	0.0161		20.32	0.09929	20.47	0.08883					NiCo	34.3	59.8
20.39	0.00985	20.74	0.02616		20.34	0.07447	20.49	0.08309
20.41	0.00493	20.76	0.0161		20.36	0.05319	20.51	0.08596
20.43	0	20.78	0.02414		20.38	0.08865	20.53	0.10888
20.45	0.00985	20.8	0.02817		20.4	0.0922	20.55	0.0659
20.47	0	20.82	0.02817		20.42	0.10284	20.57	0.0659
20.49	0	20.84	0.01811		20.44	0.11702	20.59	0.08023
20.51	0.03941	20.86	0.01408		20.46	0.07092	20.61	0.0659
20.53	0	20.88	0.01408		20.48	0.07801	20.63	0.08023
20.55	0.03448	20.9	0.02012		20.5	0.08156	20.65	0.08309
20.57	0.03941	20.92	0.02213		20.52	0.07801	20.67	0.09456
20.59	0.04926	20.94	0.0161		20.54	0.07801	20.69	0.0745
20.61	0.03448	20.96	0.0161		20.56	0.10993	20.71	0.08023
20.63	0	20.98	0.01006		20.58	0.04965	20.73	0.08023
20.65	0	21	0.02213		20.6	0.07092	20.75	0.05158
20.67	0	21.02	0.02616		20.62	0.08156	20.77	0.08596
20.69	0.00493	21.04	0.01006		20.64	0.08511	20.79	0.07163
20.71	0.00985	21.06	0.01408		20.66	0.07092	20.81	0.08023
20.73	0	21.08	0.02616		20.68	0.07447	20.83	0.08023
20.75	0	21.1	0.01207		20.7	0.06383	20.85	0.08309
20.77	0.03448	21.12	0.02616		20.72	0.06383	20.87	0.09456
20.79	0	21.14	0.02213		20.74	0.09574	20.89	0.07163
20.81	0	21.16	0.01207		20.76	0.0922	20.91	0.08596
20.83	0	21.18	0.01811		20.78	0.08156	20.93	0.10602
20.85	0	21.2	0.00805		20.8	0.12766	20.95	0.09169
20.87	0.01478	21.22	0.01811		20.82	0.11702	20.97	0.08309
20.89	0	21.24	0.01408		20.84	0.12057	20.99	0.11175
20.91	0.00985	21.26	0.02012		20.86	0.14539	21.01	0.08596
20.93	0.01478	21.28	0.02414		20.88	0.10284	21.03	0.08596
20.95	0	21.3	0.02012		20.9	0.06738	21.05	0.06304
20.97	0.02463	21.32	0.02012		20.92	0.08865	21.07	0.09456
20.99	0	21.34	0.03018		20.94	0.06028	21.09	0.09742
21.01	0.00493	21.36	0.03018		20.96	0.10638	21.11	0.0659
21.03	0.02463	21.38	0.02414		20.98	0.11348	21.13	0.08596
21.05	0	21.4	0.02213		21	0.08511	21.15	0.08023
21.07	0.07882	21.42	0.02817		21.02	0.08156	21.17	0.07736
21.09	0.00985	21.44	0.0161		21.04	0.07447	21.19	0.08883
21.11	0	21.46	0.02213		21.06	0.10993	21.21	0.05731
21.13	0.02956	21.48	0.02213		21.08	0.07092	21.23	0.06017
21.15	0	21.5	0.02213		21.1	0.08156	21.25	0.08023
21.17	0	21.52	0.02213		21.12	0.12057	21.27	0.0745
21.19	0	21.54	0.02012		21.14	0.08865	21.29	0.08596
21.21	0	21.56	0.01811		21.16	0.08156	21.31	0.08596
21.23	0.02956	21.58	0.02414		21.18	0.07801	21.33	0.07163
21.25	0	21.6	0.02213		21.2	0.09929	21.35	0.0659
21.27	0.03448	21.62	0.02817		21.22	0.11702	21.37	0.10029
21.29	0.00493	21.64	0.02817		21.24	0.06028	21.39	0.08023
21.31	0	21.66	0.02616		21.26	0.09574	21.41	0.08309
21.33	0.04926	21.68	0.01811		21.28	0.10638	21.43	0.07163
21.35	0.0197	21.7	0.0161		21.3	0.11702	21.45	0.08596
21.37	0.0197	21.72	0.01811		21.32	0.13121	21.47	0.08596
21.39	0.01478	21.74	0.02213		21.34	0.15248	21.49	0.10888
21.41	0	21.76	0.00805		21.36	0.12057	21.51	0.08883
21.43	0	21.78	0.02817		21.38	0.0922	21.53	0.11461
21.45	0	21.8	0.02616		21.4	0.10284	21.55	0.05158
21.47	0.02463	21.82	0.02414		21.42	0.11702	21.57	0.08883
21.49	0	21.84	0.01811		21.44	0.07092	21.59	0.07163
21.51	0	21.86	0.02616		21.46	0.09929	21.61	0.08596
21.53	0	21.88	0.02616		21.48	0.08156	21.63	0.06877
21.55	0	21.9	0.02213		21.5	0.08156	21.65	0.08023
21.57	0	21.92	0.02012		21.52	0.07801	21.67	0.08596
21.59	0	21.94	0.01811		21.54	0.08156	21.69	0.07163
21.61	0.00493	21.96	0.01811		21.56	0.11348	21.71	0.10315
21.63	0.01478	21.98	0.01811		21.58	0.12057	21.73	0.08883
21.65	0	22	0.02616		21.6	0.08511	21.75	0.08883
21.67	0	22.02	0.02616		21.62	0.06383	21.77	0.08309
21.69	0	22.04	0.01811		21.64	0.0922	21.79	0.08023
21.71	0.02463	22.06	0.01408		21.66	0.08865	21.81	0.08309
21.73	0	22.08	0.01408		21.68	0.11348	21.83	0.10315
21.75	0.06897	22.1	0.02012		21.7	0.10993	21.85	0.09456
21.77	0	22.12	0.02012		21.72	0.08511	21.87	0.08883
21.79	0.06897	22.14	0.02213		21.74	0.08156	21.89	0.09456
21.81	0.00493	22.16	0.01811		21.76	0.09929	21.91	0.08883
21.83	0.00493	22.18	0.02414		21.78	0.12766	21.93	0.08023
21.85	0	22.2	0.01408		21.8	0.12411	21.95	0.09742
21.87	0	22.22	0.0161		21.82	0.08511	21.97	0.09169
21.89	0.03941	22.24	0.02616		21.84	0.0922	21.99	0.07736
21.91	0	22.26	0.02012		21.86	0.10284	22.01	0.1404
21.93	0.01478	22.28	0.02012		21.88	0.08511	22.03	0.05731
21.95	0.03941	22.3	0.02213		21.9	0.09574	22.05	0.09169
21.97	0	22.32	0.01408		21.92	0.09929	22.07	0.0745
21.99	0	22.34	0.02414		21.94	0.10638	22.09	0.09169
22.01	0	22.36	0.01207		21.96	0.09574	22.11	0.06304
22.03	0	22.38	0.0161		21.98	0.09574	22.13	0.0745
22.05	0	22.4	0.02616		22	0.10993	22.15	0.08023
22.07	0	22.42	0.02012		22.02	0.09929	22.17	0.08309
22.09	0	22.44	0.01811		22.04	0.10993	22.19	0.08596
22.11	0.08374	22.46	0.01408		22.06	0.11702	22.21	0.07163
22.13	0	22.48	0.02012		22.08	0.08511	22.23	0.08596
22.15	0.00493	22.5	0.01408		22.1	0.11348	22.25	0.06304
22.17	0	22.52	0.01207		22.12	0.09574	22.27	0.07163
22.19	0.02463	22.54	0.02213		22.14	0.10284	22.29	0.10315
22.21	0	22.56	0.02213		22.16	0.12766	22.31	0.09456
22.23	0.05911	22.58	0.01408		22.18	0.0922	22.33	0.07736
22.25	0	22.6	0.03219		22.2	0.10638	22.35	0.09456
22.27	0.0197	22.62	0.01811		22.22	0.08511	22.37	0.07736
22.29	0.00493	22.64	0.02414		22.24	0.11702	22.39	0.0659
22.31	0	22.66	0.02012		22.26	0.10993	22.41	0.08596
22.33	0	22.68	0.02817		22.28	0.08865	22.43	0.07163
22.35	0	22.7	0.00805		22.3	0.11348	22.45	0.11175
22.37	0.02956	22.72	0.02414		22.32	0.08511	22.47	0.07163
22.39	0.02956	22.74	0.02012		22.34	0.10638	22.49	0.0745
22.41	0.0197	22.76	0.01811		22.36	0.13475	22.51	0.10602
22.43	0	22.78	0.00805		22.38	0.10638	22.53	0.06017
22.45	0.00985	22.8	0.01811		22.4	0.07801	22.55	0.06877
22.47	0.04433	22.82	0.0161		22.42	0.10638	22.57	0.08023
22.49	0	22.84	0.0161		22.44	0.08865	22.59	0.08023
22.51	0	22.86	0.01207		22.46	0.10638	22.61	0.07163
22.53	0.03448	22.88	0.02012		22.48	0.13121	22.63	0.07736
22.55	0.06404	22.9	0.01811		22.5	0.09574	22.65	0.09742
22.57	0.00985	22.92	0.02213		22.52	0.07447	22.67	0.08596
22.59	0.01478	22.94	0.02616		22.54	0.10638	22.69	0.10888
22.61	0.0197	22.96	0.02414		22.56	0.14539	22.71	0.07736
22.63	0.08374	22.98	0.01408		22.58	0.06738	22.73	0.08596
22.65	0.03941	23	0.02012		22.6	0.08156	22.75	0.08883
22.67	0.0197	23.02	0.01408		22.62	0.08156	22.77	0.07163
22.69	0.01478	23.04	0.00805		22.64	0.08511	22.79	0.11175
22.71	0.00985	23.06	0.03622		22.66	0.13121	22.81	0.09742
22.73	0.06897	23.08	0.01811		22.68	0.06028	22.83	0.07736
22.75	0.00493	23.1	0.01408		22.7	0.08156	22.85	0.11748
22.77	0.01478	23.12	0.0161		22.72	0.10993	22.87	0.09169
22.79	0	23.14	0.0161		22.74	0.12766	22.89	0.10029
22.81	0.05911	23.16	0.02414		22.76	0.08156	22.91	0.10029
22.83	0	23.18	0.02616		22.78	0.11702	22.93	0.09742
22.85	0.01478	23.2	0.01811		22.8	0.11702	22.95	0.09742
22.87	0.00985	23.22	0.02213		22.82	0.0922	22.97	0.09169
22.89	0.07389	23.24	0.02616		22.84	0.07447	22.99	0.13181
22.91	0.0197	23.26	0.02414		22.86	0.09929	23.01	0.08596
22.93	0.01478	23.28	0.02414		22.88	0.12411	23.03	0.09742
22.95	0.00493	23.3	0.01811		22.9	0.11702	23.05	0.10602
22.97	0.05419	23.32	0.02012		22.92	0.07092	23.07	0.08023
22.99	0	23.34	0.01408		22.94	0.10284	23.09	0.08309
23.01	0	23.36	0.02616		22.96	0.10284	23.11	0.09169
23.03	0.01478	23.38	0.01811		22.98	0.0922	23.13	0.08023
23.05	0.06897	23.4	0.0161		23	0.08511	23.15	0.0745
23.07	0.01478	23.42	0.03622		23.02	0.07447	23.17	0.11461
23.09	0.03448	23.44	0.00805		23.04	0.09929	23.19	0.11175
23.11	0.0197	23.46	0.02012		23.06	0.11702	23.21	0.08596
23.13	0.05911	23.48	0.02012		23.08	0.13121	23.23	0.10315
23.15	0.05911	23.5	0.02012		23.1	0.10993	23.25	0.09169
23.17	0.02463	23.52	0.02213		23.12	0.07447	23.27	0.0745
23.19	0.01478	23.54	0.02817		23.14	0.11348	23.29	0.0745
23.21	0.00493	23.56	0.01207		23.16	0.12766	23.31	0.08309
23.23	0.133	23.58	0.01207		23.18	0.09574	23.33	0.0745
23.25	0.04433	23.6	0.02213		23.2	0.10638	23.35	0.12894
23.27	0.08867	23.62	0.01408		23.22	0.10284	23.37	0.10029
23.29	0.06404	23.64	0.01811		23.24	0.1383	23.39	0.12321
23.31	0.06404	23.66	0.01408		23.26	0.08156	23.41	0.11461
23.33	0.03448	23.68	0.01408		23.28	0.09574	23.43	0.09169
23.35	0.0197	23.7	0.02012		23.3	0.10993	23.45	0.10315
23.37	0.04433	23.72	0.01207		23.32	0.07801	23.47	0.09456
23.39	0.04926	23.74	0.02616		23.34	0.0922	23.49	0.09742
23.41	0.06897	23.76	0.03018		23.36	0.10993	23.51	0.11748
23.43	0.00985	23.78	0.02213		23.38	0.11348	23.53	0.09742
23.45	0.0197	23.8	0.01408		23.4	0.08865	23.55	0.05731
23.47	0	23.82	0.01811		23.42	0.08865	23.57	0.10888
23.49	0.00985	23.84	0.01811		23.44	0.06383	23.59	0.09456
23.51	0	23.86	0.01207		23.46	0.08865	23.61	0.06877
23.53	0.08374	23.88	0.01408		23.48	0.08511	23.63	0.11175
23.55	0.02956	23.9	0.02616		23.5	0.10993	23.65	0.08309
23.57	0.02463	23.92	0.01811		23.52	0.11702	23.67	0.0745
23.59	0.02463	23.94	0.02817		23.54	0.08511	23.69	0.08023
23.61	0.06404	23.96	0.02414		23.56	0.07092	23.71	0.09742
23.63	0.02956	23.98	0.02817		23.58	0.07447	23.73	0.09169
23.65	0.07389	24	0.02213		23.6	0.08865	23.75	0.09742
23.67	0	24.02	0.0161		23.62	0.10284	23.77	0.09742
23.69	0	24.04	0.01207		23.64	0.11702	23.79	0.09742
23.71	0.01478	24.06	0.01811		23.66	0.0922	23.81	0.07163
23.73	0.06404	24.08	0.02213		23.68	0.06738	23.83	0.08309
23.75	0	24.1	0.02012		23.7	0.13121	23.85	0.09742
23.77	0.08374	24.12	0.02012		23.72	0.05674	23.87	0.08883
23.79	0.01478	24.14	0.01811		23.74	0.12411	23.89	0.08023
23.81	0.05911	24.16	0.01207		23.76	0.10993	23.91	0.0659
23.83	0.01478	24.18	0.02817		23.78	0.12411	23.93	0.10315
23.85	0.08374	24.2	0.02213		23.8	0.0922	23.95	0.07163
23.87	0.03448	24.22	0.02817		23.82	0.12411	23.97	0.06304
23.89	0.04433	24.24	0.01408		23.84	0.0922	23.99	0.07163
23.91	0.01478	24.26	0.02414		23.86	0.06383	24.01	0.06304
23.93	0.05419	24.28	0.02414		23.88	0.10638	24.03	0.09742
23.95	0.07882	24.3	0.02012		23.9	0.10993	24.05	0.10888
23.97	0.04926	24.32	0.01811		23.92	0.09574	24.07	0.11748
23.99	0.0936	24.34	0.01811		23.94	0.10638	24.09	0.10602
24.01	0.02956	24.36	0.02213		23.96	0.08865	24.11	0.08023
24.03	0.02956	24.38	0.02414		23.98	0.09574	24.13	0.05731
24.05	0.05911	24.4	0.01207		24	0.07092	24.15	0.06877
24.07	0.07882	24.42	0.01207		24.02	0.09929	24.17	0.08596
24.09	0.04433	24.44	0.01811		24.04	0.07447	24.19	0.08596
24.11	0.08374	24.46	0.01408		24.06	0.08865	24.21	0.10029
24.13	0.05911	24.48	0.0161		24.08	0.11348	24.23	0.08023
24.15	0.00985	24.5	0.01811		24.1	0.12411	24.25	0.09169
24.17	0.00493	24.52	0.01006		24.12	0.09929	24.27	0.08596
24.19	0.02463	24.54	0.02012		24.14	0.12411	24.29	0.09456
24.21	0	24.56	0.02012		24.16	0.08156	24.31	0.09456
24.23	0.09852	24.58	0.0161		24.18	0.09929	24.33	0.10029
24.25	0.02956	24.6	0.01811		24.2	0.07447	24.35	0.09742
24.27	0.1133	24.62	0.02012		24.22	0.07092	24.37	0.0659
24.29	0.00493	24.64	0.02414		24.24	0.10638	24.39	0.12321
24.31	0.02956	24.66	0.01408		24.26	0.1383	24.41	0.12894
24.33	0.0197	24.68	0.02012		24.28	0.0922	24.43	0.08883
24.35	0.04926	24.7	0.03421		24.3	0.0922	24.45	0.0745
24.37	0.03448	24.72	0.03018		24.32	0.09574	24.47	0.12894
24.39	0.03448	24.74	0.01408		24.34	0.09929	24.49	0.13467
24.41	0.02463	24.76	0.0161		24.36	0.08865	24.51	0.12034
24.43	0.01478	24.78	0.02616		24.38	0.12411	24.53	0.09742
24.45	0.02956	24.8	0.02213		24.4	0.08511	24.55	0.10029
24.47	0.03941	24.82	0.02213		24.42	0.09574	24.57	0.09456
24.49	0.05911	24.84	0.01408		24.44	0.05674	24.59	0.08883
24.51	0.04433	24.86	0.01811		24.46	0.11702	24.61	0.08596
24.53	0.05911	24.88	0.02213		24.48	0.12766	24.63	0.07163
24.55	0.05911	24.9	0.02213		24.5	0.12411	24.65	0.10602
24.57	0.00985	24.92	0.03018		24.52	0.10993	24.67	0.08596
24.59	0	24.94	0.03622		24.54	0.07801	24.69	0.06017
24.61	0	24.96	0.01207		24.56	0.09929	24.71	0.08309
24.63	0.05419	24.98	0.0161		24.58	0.09929	24.73	0.0745
24.65	0.02463	25	0.01207		24.6	0.08511	24.75	0.12321
24.67	0.07882	25.02	0.02817		24.62	0.08511	24.77	0.09742
24.69	0.00493	25.04	0.03823		24.64	0.11348	24.79	0.0745
24.71	0.02463	25.06	0.02817		24.66	0.08865	24.81	0.10315
24.73	0.00985	25.08	0.02414		24.68	0.08865	24.83	0.09456
24.75	0.06404	25.1	0.02414		24.7	0.0922	24.85	0.10602
24.77	0.0197	25.12	0.03421		24.72	0.07801	24.87	0.08883
24.79	0.02956	25.14	0.02414		24.74	0.12766	24.89	0.10315
24.81	0.0197	25.16	0.02616		24.76	0.14184	24.91	0.11461
24.83	0.02463	25.18	0.02414		24.78	0.14539	24.93	0.10029
24.85	0.07389	25.2	0.02414		24.8	0.10284	24.95	0.11175
24.87	0.13793	25.22	0.04225		24.82	0.09574	24.97	0.09456
24.89	0.04926	25.24	0.02817		24.84	0.08865	24.99	0.09169
24.91	0.02463	25.26	0.02817		24.86	0.0922	25.01	0.10602
24.93	0.0197	25.28	0.03421		24.88	0.12411	25.03	0.08883
24.95	0	25.3	0.02012		24.9	0.06028	25.05	0.10602
24.97	0.0936	25.32	0.02012		24.92	0.11348	25.07	0.09456
24.99	0.08374	25.34	0.03622		24.94	0.0922	25.09	0.12321
25.01	0.01478	25.36	0.03018		24.96	0.09574	25.11	0.11175
25.03	0.0197	25.38	0.02616		24.98	0.0922	25.13	0.09169
25.05	0.00493	25.4	0.02616		25	0.07447	25.15	0.10602
25.07	0.05419	25.42	0.02012		25.02	0.08156	25.17	0.10315
25.09	0.05419	25.44	0.02414		25.04	0.10284	25.19	0.10602
25.11	0.03941	25.46	0.01811		25.06	0.12766	25.21	0.09456
25.13	0.02956	25.48	0.02616		25.08	0.08865	25.23	0.10888
25.15	0.00985	25.5	0.01811		25.1	0.10638	25.25	0.09456
25.17	0.03941	25.52	0.03018		25.12	0.08865	25.27	0.09456
25.19	0.04926	25.54	0.02414		25.14	0.10638	25.29	0.09456
25.21	0.04433	25.56	0.03219		25.16	0.15957	25.31	0.07163
25.23	0.03448	25.58	0.02616		25.18	0.12057	25.33	0.0745
25.25	0.02956	25.6	0.02213		25.2	0.10638	25.35	0.10602
25.27	0.03448	25.62	0.02616		25.22	0.13121	25.37	0.08883
25.29	0.04926	25.64	0.01811		25.24	0.09929	25.39	0.10029
25.31	0.03448	25.66	0.03018		25.26	0.07801	25.41	0.07163
25.33	0.04926	25.68	0.02414		25.28	0.08511	25.43	0.10888
25.35	0.08867	25.7	0.03823		25.3	0.0922	25.45	0.09169
25.37	0.04926	25.72	0.01408		25.32	0.08865	25.47	0.09742
25.39	0.00985	25.74	0.02616		25.34	0.10638	25.49	0.11175
25.41	0.04926	25.76	0.02616		25.36	0.09929	25.51	0.09169
25.43	0.03941	25.78	0.03219		25.38	0.08865	25.53	0.08883
25.45	0.05419	25.8	0.02817		25.4	0.07801	25.55	0.09456
25.47	0.02463	25.82	0.03421		25.42	0.08865	25.57	0.08309
25.49	0.02956	25.84	0.03018		25.44	0.08865	25.59	0.10602
25.51	0.02956	25.86	0.05634		25.46	0.10638	25.61	0.07736
25.53	0.06404	25.88	0.03018		25.48	0.10638	25.63	0.09169
25.55	0.03448	25.9	0.02414		25.5	0.10638	25.65	0.10315
25.57	0.05911	25.92	0.03018		25.52	0.09574	25.67	0.09169
25.59	0.03941	25.94	0.03421		25.54	0.11348	25.69	0.10315
25.61	0.00493	25.96	0.04225		25.56	0.12057	25.71	0.08596
25.63	0.0197	25.98	0.02817		25.58	0.11702	25.73	0.10029
25.65	0.05911	26	0.03421		25.6	0.08865	25.75	0.08883
25.67	0.02463	26.02	0.03823		25.62	0.10638	25.77	0.08596
25.69	0.06404	26.04	0.03018		25.64	0.09929	25.79	0.10315
25.71	0.06897	26.06	0.03018		25.66	0.11348	25.81	0.05731
25.73	0	26.08	0.03823		25.68	0.10993	25.83	0.12034
25.75	0.02463	26.1	0.02414		25.7	0.12766	25.85	0.12607
25.77	0.04433	26.12	0.03018		25.72	0.09574	25.87	0.11175
25.79	0.01478	26.14	0.02817		25.74	0.12411	25.89	0.0745
25.81	0.12315	26.16	0.02817		25.76	0.13475	25.91	0.08023
25.83	0.04433	26.18	0.02414		25.78	0.07092	25.93	0.08883
25.85	0.02956	26.2	0.03219		25.8	0.13475	25.95	0.07736
25.87	0.0197	26.22	0.02817		25.82	0.12766	25.97	0.08883
25.89	0.04433	26.24	0.03421		25.84	0.09574	25.99	0.08309
25.91	0.03448	26.26	0.02817		25.86	0.08156	26.01	0.10315
25.93	0.00493	26.28	0.03018		25.88	0.10284	26.03	0.09169
25.95	0.01478	26.3	0.04427		25.9	0.15248	26.05	0.08883
25.97	0.05419	26.32	0.03421		25.92	0.11348	26.07	0.08596
25.99	0.03941	26.34	0.05231		25.94	0.10284	26.09	0.06877
26.01	0.04433	26.36	0.04024		25.96	0.13475	26.11	0.0745
26.03	0.0936	26.38	0.02213		25.98	0.13121	26.13	0.10602
26.05	0.0197	26.4	0.03421		26	0.11702	26.15	0.09456
26.07	0.03448	26.42	0.03018		26.02	0.08865	26.17	0.11461
26.09	0	26.44	0.03219		26.04	0.10993	26.19	0.11175
26.11	0.03941	26.46	0.03622		26.06	0.08511	26.21	0.06877
26.13	0.03448	26.48	0.02213		26.08	0.09574	26.23	0.08596
26.15	0.04433	26.5	0.02213		26.1	0.07801	26.25	0.09456
26.17	0.06404	26.52	0.03421		26.12	0.10993	26.27	0.08596
26.19	0.02463	26.54	0.02817		26.14	0.13121	26.29	0.10602
26.21	0.02463	26.56	0.03622		26.16	0.08511	26.31	0.09742
26.23	0	26.58	0.03018		26.18	0.09929	26.33	0.09169
26.25	0.0197	26.6	0.04024		26.2	0.12766	26.35	0.08883
26.27	0.02956	26.62	0.02616		26.22	0.11702	26.37	0.11748
26.29	0.02956	26.64	0.03018		26.24	0.09929	26.39	0.08883
26.31	0.02463	26.66	0.0503		26.26	0.09929	26.41	0.08309
26.33	0.05419	26.68	0.04225		26.28	0.11348	26.43	0.08883
26.35	0.01478	26.7	0.03421		26.3	0.10284	26.45	0.08309
26.37	0.03941	26.72	0.03421		26.32	0.10638	26.47	0.09742
26.39	0.0197	26.74	0.02817		26.34	0.08865	26.49	0.10602
26.41	0.0197	26.76	0.03622		26.36	0.14894	26.51	0.0745
26.43	0.01478	26.78	0.02616		26.38	0.0922	26.53	0.06304
26.45	0.0197	26.8	0.0503		26.4	0.12766	26.55	0.08023
26.47	0.04926	26.82	0.02213		26.42	0.14184	26.57	0.11175
26.49	0	26.84	0.02817		26.44	0.08865	26.59	0.07163
26.51	0	26.86	0.03219		26.46	0.11348	26.61	0.10029
26.53	0.02956	26.88	0.03622		26.48	0.12057	26.63	0.06877
26.55	0.04926	26.9	0.02414		26.5	0.11348	26.65	0.10315
26.57	0.05911	26.92	0.02012		26.52	0.15603	26.67	0.0659
26.59	0.07882	26.94	0.02616		26.54	0.10993	26.69	0.09742
26.61	0.02463	26.96	0.03018		26.56	0.10284	26.71	0.12607
26.63	0.02956	26.98	0.03018		26.58	0.18085	26.73	0.0745
26.65	0	27	0.02012		26.6	0.13121	26.75	0.10888
26.67	0	27.02	0.02414		26.62	0.10993	26.77	0.12607
26.69	0.0197	27.04	0.01207		26.64	0.12057	26.79	0.1404
26.71	0.00985	27.06	0.02414		26.66	0.09929	26.81	0.16619
26.73	0.02463	27.08	0.02213		26.68	0.09574	26.83	0.11461
26.75	0.04433	27.1	0.00805		26.7	0.09574	26.85	0.12034
26.77	0.0197	27.12	0.01811		26.72	0.11348	26.87	0.11461
26.79	0.00493	27.14	0.02414		26.74	0.14184	26.89	0.11748
26.81	0.04433	27.16	0.03018		26.76	0.13121	26.91	0.14613
26.83	0	27.18	0.02213		26.78	0.09574	26.93	0.09742
26.85	0.00493	27.2	0.02213		26.8	0.12766	26.95	0.05444
26.87	0.00985	27.22	0.02414		26.82	0.07092	26.97	0.10029
26.89	0.01478	27.24	0.02817		26.84	0.0922	26.99	0.12607
26.91	0	27.26	0.01811		26.86	0.08865	27.01	0.07163
26.93	0	27.28	0.03018		26.88	0.0922	27.03	0.09169
26.95	0	27.3	0.01811		26.9	0.09574	27.05	0.08023
26.97	0.05419	27.32	0.00805		26.92	0.09574	27.07	0.08023
26.99	0	27.34	0.02616		26.94	0.10638	27.09	0.12034
27.01	0	27.36	0.01408		26.96	0.07092	27.11	0.08596
27.03	0	27.38	0.00604		26.98	0.10993	27.13	0.10602
27.05	0	27.4	0.02012		27	0.08865	27.15	0.07736
27.07	0.02956	27.42	0.02616		27.02	0.13121	27.17	0.09742
27.09	0.01478	27.44	0.02817		27.04	0.08156	27.19	0.08023
27.11	0.06404	27.46	0.01811		27.06	0.09929	27.21	0.06877
27.13	0	27.48	0.02414		27.08	0.08511	27.23	0.08596
27.15	0	27.5	0.00805		27.1	0.08865	27.25	0.09169
27.17	0.00493	27.52	0.01408		27.12	0.06738	27.27	0.13181
27.19	0	27.54	0.02414		27.14	0.10638	27.29	0.09456
27.21	0.02956	27.56	0.00805		27.16	0.12057	27.31	0.09169
27.23	0.00985	27.58	0.0161		27.18	0.10284	27.33	0.09456
27.25	0	27.6	0.02414		27.2	0.09574	27.35	0.07163
27.27	0.03448	27.62	0.02213		27.22	0.08156	27.37	0.08596
27.29	0	27.64	0.03219		27.24	0.09929	27.39	0.0659
27.31	0	27.66	0.02616		27.26	0.08511	27.41	0.09169
27.33	0.01478	27.68	0.02414		27.28	0.05674	27.43	0.08023
27.35	0	27.7	0.01811		27.3	0.08156	27.45	0.07163
27.37	0.00493	27.72	0.02817		27.32	0.07092	27.47	0.09169
27.39	0.04926	27.74	0.02012		27.34	0.10993	27.49	0.0745
27.41	0.00493	27.76	0.01811		27.36	0.0922	27.51	0.08309
27.43	0.03448	27.78	0.03018		27.38	0.08156	27.53	0.07163
27.45	0	27.8	0.03421		27.4	0.08511	27.55	0.08023
27.47	0	27.82	0.02012		27.42	0.07801	27.57	0.0659
27.49	0	27.84	0.02012		27.44	0.10993	27.59	0.09742
27.51	0	27.86	0.01006		27.46	0.08511	27.61	0.05731
27.53	0.03448	27.88	0.02414		27.48	0.08511	27.63	0.07736
27.55	0	27.9	0.02213		27.5	0.10284	27.65	0.08309
27.57	0	27.92	0.02213		27.52	0.07092	27.67	0.08309
27.59	0.05911	27.94	0.01006		27.54	0.09929	27.69	0.09456
27.61	0	27.96	0.02012		27.56	0.0922	27.71	0.0659
27.63	0.01478	27.98	0.01408		27.58	0.0922	27.73	0.06304
27.65	0.03448	28	0.01207		27.6	0.08156	27.75	0.07736
27.67	0.0197	28.02	0.02213		27.62	0.13475	27.77	0.09169
27.69	0	28.04	0.02414		27.64	0.08156	27.79	0.10029
27.71	0	28.06	0.01811		27.66	0.09929	27.81	0.05731
27.73	0	28.08	0.02213		27.68	0.09574	27.83	0.06304
27.75	0	28.1	0.01207		27.7	0.07092	27.85	0.11748
27.77	0	28.12	0.00805		27.72	0.09929	27.87	0.0745
27.79	0	28.14	0.01408		27.74	0.08511	27.89	0.08596
27.81	0.03448	28.16	0.00201		27.76	0.08511	27.91	0.09169
27.83	0	28.18	0.02616		27.78	0.07092	27.93	0.08596
27.85	0	28.2	0.0161		27.8	0.07801	27.95	0.08596
27.87	0	28.22	0.0161		27.82	0.0922	27.97	0.08883
27.89	0.00985	28.24	0.02012		27.84	0.08156	27.99	0.08883
27.91	0.00493	28.26	0.02213		27.86	0.09574	28.01	0.11748
27.93	0.03941	28.28	0.02616		27.88	0.03901	28.03	0.0745
27.95	0	28.3	0.01207		27.9	0.12766	28.05	0.08596
27.97	0.00985	28.32	0.02817		27.92	0.06383	28.07	0.06017
27.99	0	28.34	0.00604		27.94	0.06028	28.09	0.05731
28.01	0	28.36	0.01006		27.96	0.06738	28.11	0.12034
28.03	0	28.38	0.01408		27.98	0.07447	28.13	0.10888
28.05	0	28.4	0.0161		28	0.11702	28.15	0.09456
28.07	0	28.42	0.01408		28.02	0.07447	28.17	0.09742
28.09	0	28.44	0.01811		28.04	0.07092	28.19	0.0745
28.11	0.00985	28.46	0.02616		28.06	0.09929	28.21	0.06877
28.13	0.00985	28.48	0.0161		28.08	0.11348	28.23	0.09742
28.15	0.05911	28.5	0.00604		28.1	0.10993	28.25	0.07736
28.17	0	28.52	0.01207		28.12	0.10284	28.27	0.10602
28.19	0.00985	28.54	0.01006		28.14	0.10993	28.29	0.05158
28.21	0	28.56	0.01006		28.16	0.09929	28.31	0.08309
28.23	0.00493	28.58	0.02213		28.18	0.0922	28.33	0.08596
28.25	0	28.6	0.0161		28.2	0.08511	28.35	0.08596
28.27	0	28.62	0.02012		28.22	0.10284	28.37	0.08596
28.29	0.0197	28.64	0.01811		28.24	0.08511	28.39	0.08023
28.31	0.03448	28.66	0.01811		28.26	0.08865	28.41	0.08023
28.33	0.00985	28.68	0.01207		28.28	0.09929	28.43	0.05731
28.35	0	28.7	0.02012		28.3	0.09929	28.45	0.08309
28.37	0.01478	28.72	0.0161		28.32	0.09929	28.47	0.06017
28.39	0	28.74	0.01006		28.34	0.04965	28.49	0.08596
28.41	0.05419	28.76	0.01207		28.36	0.06028	28.51	0.10029
28.43	0.03941	28.78	0.02012		28.38	0.08865	28.53	0.0745
28.45	0.0197	28.8	0.02012		28.4	0.11348	28.55	0.08596
28.47	0.00493	28.82	0.01006		28.42	0.08865	28.57	0.08309
28.49	0.00985	28.84	0.02012		28.44	0.10284	28.59	0.09169
28.51	0	28.86	0.01207		28.46	0.06738	28.61	0.09456
28.53	0.03941	28.88	0.02213		28.48	0.10284	28.63	0.08023
28.55	0.04433	28.9	0.02213		28.5	0.06383	28.65	0.0659
28.57	0.0197	28.92	0.01207		28.52	0.06738	28.67	0.08883
28.59	0	28.94	0.0161		28.54	0.08156	28.69	0.09456
28.61	0.00985	28.96	0.02012		28.56	0.05319	28.71	0.0659
28.63	0.00493	28.98	0.0161		28.58	0.10638	28.73	0.06877
28.65	0.02956	29	0.01006		28.6	0.09929	28.75	0.08596
28.67	0	29.02	0.01811		28.62	0.08156	28.77	0.06877
28.69	0	29.04	0.01408		28.64	0.05319	28.79	0.07736
28.71	0.00985	29.06	0.00805		28.66	0.05319	28.81	0.07736
28.73	0	29.08	0.01408		28.68	0.06383	28.83	0.08309
28.75	0.01478	29.1	0.01207		28.7	0.08156	28.85	0.09169
28.77	0	29.12	0.00402		28.72	0.07447	28.87	0.06877
28.79	0	29.14	0.01408		28.74	0.08865	28.89	0.0659
28.81	0.03448	29.16	0.01408		28.76	0.09929	28.91	0.08023
28.83	0	29.18	0.00805		28.78	0.06028	28.93	0.09456
28.85	0.02463	29.2	0.01408		28.8	0.0922	28.95	0.08596
28.87	0.03448	29.22	0.01207		28.82	0.08511	28.97	0.08883
28.89	0	29.24	0.0161		28.84	0.07447	28.99	0.0745
28.91	0.03448	29.26	0.0161		28.86	0.0461	29.01	0.08596
28.93	0	29.28	0.01207		28.88	0.12057	29.03	0.08883
28.95	0	29.3	0.0161		28.9	0.08865	29.05	0.06304
28.97	0.00493	29.32	0.0161		28.92	0.07801	29.07	0.08023
28.99	0.03448	29.34	0.02414		28.94	0.07447	29.09	0.0745
29.01	0.02463	29.36	0.01408		28.96	0.06383	29.11	0.09169
29.03	0.00493	29.38	0.01207		28.98	0.08865	29.13	0.06304
29.05	0.00493	29.4	0.01811		29	0.06028	29.15	0.07163
29.07	0	29.42	0.01811		29.02	0.08865	29.17	0.0659
29.09	0.06404	29.44	0.01207		29.04	0.06738	29.19	0.06877
29.11	0	29.46	0.00604		29.06	0.07801	29.21	0.0659
29.13	0.02956	29.48	0.01006		29.08	0.06738	29.23	0.09742
29.15	0	29.5	0.01207		29.1	0.07447	29.25	0.06304
29.17	0	29.52	0.01408		29.12	0.05674	29.27	0.05731
29.19	0.04433	29.54	0.02012		29.14	0.07092	29.29	0.10315
29.21	0.03941	29.56	0.00805		29.16	0.06383	29.31	0.05444
29.23	0.04433	29.58	0.03018		29.18	0.0461	29.33	0.06304
29.25	0.0197	29.6	0.01408		29.2	0.07801	29.35	0.0745
29.27	0	29.62	0.00402		29.22	0.06028	29.37	0.09456
29.29	0.02463	29.64	0.01811		29.24	0.08511	29.39	0.08883
29.31	0.00985	29.66	0.01207		29.26	0.07801	29.41	0.06877
29.33	0	29.68	0.01207		29.28	0.07092	29.43	0.08023
29.35	0	29.7	0.0161		29.3	0.07092	29.45	0.07736
29.37	0	29.72	0.00604		29.32	0.09929	29.47	0.0745
29.39	0.00985	29.74	0.00604		29.34	0.07092	29.49	0.09169
29.41	0.02463	29.76	0.0161		29.36	0.08511	29.51	0.06877
29.43	0.02956	29.78	0.01207		29.38	0.0922	29.53	0.0659
29.45	0.03448	29.8	0.02012		29.4	0.09929	29.55	0.05444
29.47	0	29.82	0.00805		29.42	0.09574	29.57	0.10888
29.49	0	29.84	0.0161		29.44	0.08511	29.59	0.08023
29.51	0	29.86	0.01006		29.46	0.06028	29.61	0.0745
29.53	0.04433	29.88	0.01408		29.48	0.12766	29.63	0.04871
29.55	0	29.9	0.01811		29.5	0.07092	29.65	0.08596
29.57	0	29.92	0.01207		29.52	0.10284	29.67	0.10888
29.59	0.0197	29.94	0.01207		29.54	0.12766	29.69	0.07736
29.61	0.05419	29.96	0.01207		29.56	0.07801	29.71	0.10315
29.63	0.04926	29.98	0.02012		29.58	0.08865	29.73	0.09456
29.65	0.05419	30	0.01408		29.6	0.07801	29.75	0.08309
29.67	0	30.02	0.01207		29.62	0.06738	29.77	0.0659
29.69	0.01478	30.04	0.01006		29.64	0.07092	29.79	0.08309
29.71	0.00985	30.06	0.01811		29.66	0.08865	29.81	0.10602
29.73	0.00985	30.08	0.00805		29.68	0.07801	29.83	0.08596
29.75	0	30.1	0.00805		29.7	0.05319	29.85	0.08023
29.77	0.00493	30.12	0.01006		29.72	0.07447	29.87	0.08883
29.79	0.02463	30.14	0.01408		29.74	0.05674	29.89	0.06304
29.81	0.02956	30.16	0.01207		29.76	0.09929	29.91	0.08023
29.83	0	30.18	0.01811		29.78	0.0922	29.93	0.07736
29.85	0.00985	30.2	0.01207		29.8	0.07092	29.95	0.08309
29.87	0	30.22	0.02012		29.82	0.07092	29.97	0.08023
29.89	0	30.24	0.01811		29.84	0.08511	29.99	0.12034
29.91	0	30.26	0.00805		29.86	0.08511	30.01	0.08309
29.93	0.02956	30.28	0.0161		29.88	0.08156	30.03	0.09169
29.95	0.00493	30.3	0.01207		29.9	0.04965	30.05	0.05444
29.97	0.0197	30.32	0.01207		29.92	0.05674	30.07	0.05444
29.99	0.0197	30.34	0.00805		29.94	0.06028	30.09	0.04585
30.01	0	30.36	0.01207		29.96	0.07447	30.11	0.07736
30.03	0.03448	30.38	0.01408		29.98	0.05674	30.13	0.09169
30.05	0.03941	30.4	0.02012		30	0.08511	30.15	0.09456
30.07	0.04926	30.42	0.01207		30.02	0.06028	30.17	0.06877
30.09	0	30.44	0.02012		30.04	0.06738	30.19	0.08883
30.11	0	30.46	0.01006		30.06	0.08156	30.21	0.05731
30.13	0.01478	30.48	0.01006		30.08	0.12057	30.23	0.08883
30.15	0.00493	30.5	0.02213		30.1	0.04255	30.25	0.04298
30.17	0.04433	30.52	0.01207		30.12	0.08156	30.27	0.08883
30.19	0	30.54	0.01408		30.14	0.08865	30.29	0.09456
30.21	0.04433	30.56	0.01006		30.16	0.08156	30.31	0.0745
30.23	0.0197	30.58	0.00604		30.18	0.07092	30.33	0.07163
30.25	0.00493	30.6	0.02012		30.2	0.06383	30.35	0.0745
30.27	0	30.62	0.01006		30.22	0.07092	30.37	0.05731
30.29	0	30.64	0.01207		30.24	0.10993	30.39	0.0745
30.31	0.00493	30.66	0.00805		30.26	0.12766	30.41	0.08023
30.33	0.10837	30.68	0.01207		30.28	0.06028	30.43	0.08883
30.35	0.01478	30.7	0.0161		30.3	0.08865	30.45	0.05731
30.37	0.03941	30.72	0.01207		30.32	0.08511	30.47	0.10029
30.39	0.04926	30.74	0.00805		30.34	0.08865	30.49	0.07163
30.41	0.02956	30.76	0.00604		30.36	0.05674	30.51	0.07163
30.43	0	30.78	0.00805		30.38	0.0922	30.53	0.08309
30.45	0	30.8	0.01207		30.4	0.07447	30.55	0.0659
30.47	0	30.82	0.00604		30.42	0.08511	30.57	0.07736
30.49	0.00985	30.84	0.01811		30.44	0.07801	30.59	0.09742
30.51	0.01478	30.86	0.01811		30.46	0.06028	30.61	0.05158
30.53	0.01478	30.88	0.01006		30.48	0.09574	30.63	0.0659
30.55	0.00493	30.9	0.01006		30.5	0.08865	30.65	0.05731
30.57	0	30.92	0.01811		30.52	0.05319	30.67	0.08309
30.59	0.00493	30.94	0.01408		30.54	0.06028	30.69	0.04871
30.61	0	30.96	0.0161		30.56	0.08156	30.71	0.07163
30.63	0.00985	30.98	0.01408		30.58	0.08865	30.73	0.07163
30.65	0	31	0.0161		30.6	0.07092	30.75	0.08023
30.67	0.0197	31.02	0.00805		30.62	0.0922	30.77	0.09456
30.69	0	31.04	0.00805		30.64	0.07447	30.79	0.0659
30.71	0.03448	31.06	0.02414		30.66	0.05319	30.81	0.06877
30.73	0.03448	31.08	0.01207		30.68	0.08865	30.83	0.07736
30.75	0	31.1	0.00805		30.7	0.0922	30.85	0.04298
30.77	0.0197	31.12	0.01006		30.72	0.0461	30.87	0.05444
30.79	0.00985	31.14	0.01006		30.74	0.04965	30.89	0.08883
30.81	0	31.16	0.01207		30.76	0.07092	30.91	0.08883
30.83	0.00985	31.18	0.00604		30.78	0.05674	30.93	0.07163
30.85	0.02463	31.2	0.01006		30.8	0.08156	30.95	0.09742
30.87	0.03941	31.22	0.02012		30.82	0.07801	30.97	0.08309
30.89	0.00493	31.24	0.01408		30.84	0.08156	30.99	0.04871
30.91	0.02956	31.26	0.02213		30.86	0.06028	31.01	0.0745
30.93	0	31.28	0.01811		30.88	0.04965	31.03	0.10029
30.95	0	31.3	0.01408		30.9	0.07801	31.05	0.08309
30.97	0	31.32	0.01207		30.92	0.08865	31.07	0.06304
30.99	0	31.34	0.01408		30.94	0.06383	31.09	0.05731
31.01	0.00493	31.36	0.01408		30.96	0.07092	31.11	0.08309
31.03	0.03941	31.38	0.02012		30.98	0.05674	31.13	0.09169
31.05	0.0197	31.4	0.00805		31	0.10993	31.15	0.0659
31.07	0.00985	31.42	0.00604		31.02	0.05319	31.17	0.09169
31.09	0.07389	31.44	0.00805		31.04	0.07801	31.19	0.10029
31.11	0.03448	31.46	0.00805		31.06	0.0922	31.21	0.08883
31.13	0.00985	31.48	0.01207		31.08	0.08156	31.23	0.05444
31.15	0.02463	31.5	0.01811		31.1	0.06738	31.25	0.0659
31.17	0	31.52	0.01006		31.12	0.10284	31.27	0.06304
31.19	0.00493	31.54	0.01207		31.14	0.06028	31.29	0.0745
31.21	0	31.56	0.00604		31.16	0.07092	31.31	0.10602
31.23	0	31.58	0.01408		31.18	0.07801	31.33	0.05444
31.25	0	31.6	0.01207		31.2	0.05319	31.35	0.06304
31.27	0.03448	31.62	0.01207		31.22	0.03901	31.37	0.07163
31.29	0.08374	31.64	0.02012		31.24	0.04255	31.39	0.06304
31.31	0.04433	31.66	0.00805		31.26	0.08156	31.41	0.0745
31.33	0.06404	31.68	0.0161		31.28	0.07447	31.43	0.06877
31.35	0.02463	31.7	0.01207		31.3	0.06028	31.45	0.06017
31.37	0	31.72	0.01207		31.32	0.08511	31.47	0.0745
31.39	0	31.74	0.01207		31.34	0.08511	31.49	0.07163
31.41	0	31.76	0.00805		31.36	0.07447	31.51	0.05731
31.43	0.03448	31.78	0.02414		31.38	0.05674	31.53	0.06304
31.45	0	31.8	0.0161		31.4	0.08511	31.55	0.09169
31.47	0.02956	31.82	0.01408		31.42	0.06738	31.57	0.04871
31.49	0.02956	31.84	0.01207		31.44	0.07447	31.59	0.07736
31.51	0	31.86	0.01408		31.46	0.05674	31.61	0.0659
31.53	0	31.88	0.0161		31.48	0.05319	31.63	0.06877
31.55	0.02463	31.9	0.02616		31.5	0.08511	31.65	0.05444
31.57	0.0197	31.92	0.01207		31.52	0.08511	31.67	0.05731
31.59	0.0197	31.94	0.01006		31.54	0.04965	31.69	0.10315
31.61	0.03448	31.96	0.0161		31.56	0.07447	31.71	0.09456
31.63	0.00493	31.98	0.02213		31.58	0.07801	31.73	0.10602
31.65	0.00985	32	0.01811		31.6	0.06383	31.75	0.08023
31.67	0.00985	32.02	0.01006		31.62	0.05674	31.77	0.06017
31.69	0.0197	32.04	0.00604		31.64	0.07092	31.79	0.04585
31.71	0.02463	32.06	0.01408		31.66	0.06738	31.81	0.08883
31.73	0.05419	32.08	0.02414		31.68	0.09929	31.83	0.0659
31.75	0	32.1	0.01408		31.7	0.05319	31.85	0.06017
31.77	0.00493	32.12	0.01207		31.72	0.07092	31.87	0.05158
31.79	0.04926	32.14	0.01006		31.74	0.07801	31.89	0.07736
31.81	0.00985	32.16	0.01006		31.76	0.07092	31.91	0.05158
31.83	0.03448	32.18	0.01006		31.78	0.08511	31.93	0.08596
31.85	0.00985	32.2	0.01006		31.8	0.06383	31.95	0.04585
31.87	0.00985	32.22	0.01207		31.82	0.05674	31.97	0.06017
31.89	0.05911	32.24	0.01408		31.84	0.07092	31.99	0.07163
31.91	0.05911	32.26	0.0161		31.86	0.08156	32.01	0.0745
31.93	0.03941	32.28	0.01408		31.88	0.04965	32.03	0.06304
31.95	0.03941	32.3	0.01006		31.9	0.09929	32.05	0.08023
31.97	0.00985	32.32	0.02012		31.92	0.07447	32.07	0.07736
31.99	0.00493	32.34	0.00201		31.94	0.04255	32.09	0.06017
32.01	0.00985	32.36	0.00604		31.96	0.0461	32.11	0.04011
32.03	0.07882	32.38	0.01811		31.98	0.08156	32.13	0.0659
32.05	0	32.4	0.01408		32	0.05674	32.15	0.06017
32.07	0.04433	32.42	0.0161		32.02	0.07801	32.17	0.06304
32.09	0.02956	32.44	0.01811		32.04	0.05319	32.19	0.0659
32.11	0.02956	32.46	0.01811		32.06	0.05674	32.21	0.07163
32.13	0.05419	32.48	0.01006		32.08	0.08156	32.23	0.07163
32.15	0.02956	32.5	0.01811		32.1	0.02837	32.25	0.08023
32.17	0.03448	32.52	0.01006		32.12	0.10993	32.27	0.0745
32.19	0.02463	32.54	0.00805		32.14	0.08156	32.29	0.05444
32.21	0.0197	32.56	0.01408		32.16	0.06028	32.31	0.03725
32.23	0.08374	32.58	0.0161		32.18	0.10284	32.33	0.05731
32.25	0	32.6	0.01207		32.2	0.09574	32.35	0.06877
32.27	0.04433	32.62	0.01408		32.22	0.05319	32.37	0.05444
32.29	0	32.64	0.01006		32.24	0.08156	32.39	0.07163
32.31	0.00985	32.66	0.00805		32.26	0.06028	32.41	0.08023
32.33	0.04926	32.68	0.01006		32.28	0.05319	32.43	0.04298
32.35	0.04433	32.7	0.00604		32.3	0.06738	32.45	0.03725
32.37	0.01478	32.72	0.02414		32.32	0.09574	32.47	0.06877
32.39	0.04926	32.74	0.01207		32.34	0.0922	32.49	0.08883
32.41	0.03941	32.76	0.01811		32.36	0.05674	32.51	0.05444
32.43	0.02463	32.78	0.00604		32.38	0.06738	32.53	0.09169
32.45	0.01478	32.8	0.01408		32.4	0.04255	32.55	0.04871
32.47	0.00985	32.82	0.00604		32.42	0.08156	32.57	0.06877
32.49	0.00985	32.84	0.01811		32.44	0.06028	32.59	0.05731
32.51	0.00985	32.86	0.01207		32.46	0.07801	32.61	0.05158
32.53	0.02956	32.88	0.02213		32.48	0.04965	32.63	0.04871
32.55	0.07882	32.9	0.01207		32.5	0.06028	32.65	0.07163
32.57	0.01478	32.92	0.01006		32.52	0.07447	32.67	0.05444
32.59	0.02463	32.94	0.02213		32.54	0.04965	32.69	0.05158
32.61	0.03448	32.96	0.0161		32.56	0.04965	32.71	0.09742
32.63	0	32.98	0.01207		32.58	0.06028	32.73	0.08883
32.65	0.07882	33	0.02012		32.6	0.08156	32.75	0.07163
32.67	0	33.02	0.01207		32.62	0.06383	32.77	0.05158
32.69	0.01478	33.04	0.02012		32.64	0.07092	32.79	0.07736
32.71	0.07389	33.06	0.01408		32.66	0.05319	32.81	0.04871
32.73	0.02956	33.08	0.02213		32.68	0.07092	32.83	0.05158
32.75	0.06404	33.1	0.01811		32.7	0.06028	32.85	0.0659
32.77	0.02463	33.12	0.01811		32.72	0.04965	32.87	0.06304
32.79	0.00493	33.14	0.01207		32.74	0.05319	32.89	0.06877
32.81	0.02463	33.16	0.01207		32.76	0.08156	32.91	0.06017
32.83	0	33.18	0.01408		32.78	0.06738	32.93	0.04585
32.85	0.01478	33.2	0.01207		32.8	0.0461	32.95	0.04298
32.87	0.07882	33.22	0.01006		32.82	0.06738	32.97	0.06877
32.89	0.03448	33.24	0.0161		32.84	0.04965	32.99	0.04298
32.91	0.00985	33.26	0.01207		32.86	0.07447	33.01	0.05158
32.93	0.06404	33.28	0.00604		32.88	0.0461	33.03	0.08309
32.95	0.04926	33.3	0.01811		32.9	0.05674	33.05	0.06304
32.97	0.01478	33.32	0.01408		32.92	0.06028	33.07	0.05731
32.99	0.05911	33.34	0.01408		32.94	0.08511	33.09	0.04871
33.01	0.02463	33.36	0.01207		32.96	0.0461	33.11	0.07736
33.03	0.02956	33.38	0.02213		32.98	0.07092	33.13	0.07163
33.05	0.01478	33.4	0.00805		33	0.07447	33.15	0.0745
33.07	0.02463	33.42	0.02213		33.02	0.07447	33.17	0.04871
33.09	0	33.44	0.0161		33.04	0.06383	33.19	0.0659
33.11	0.03941	33.46	0.00805		33.06	0.03901	33.21	0.06877
33.13	0.06897	33.48	0.01006		33.08	0.06383	33.23	0.06017
33.15	0.04926	33.5	0.01811		33.1	0.0461	33.25	0.09456
33.17	0	33.52	0.01207		33.12	0.05319	33.27	0.0659
33.19	0.05911	33.54	0.01408		33.14	0.07092	33.29	0.07163
33.21	0.01478	33.56	0.00805		33.16	0.09574	33.31	0.04871
33.23	0.02956	33.58	0.00805		33.18	0.05319	33.33	0.0659
33.25	0.02956	33.6	0.01006		33.2	0.06383	33.35	0.07163
33.27	0.04433	33.62	0.01811		33.22	0.07092	33.37	0.0745
33.29	0.03448	33.64	0.00805		33.24	0.04255	33.39	0.05158
33.31	0.03941	33.66	0.01207		33.26	0.06383	33.41	0.08883
33.33	0.03941	33.68	0.0161		33.28	0.06383	33.43	0.05444
33.35	0.00493	33.7	0.00805		33.3	0.06738	33.45	0.06017
33.37	0.11823	33.72	0.02817		33.32	0.04255	33.47	0.06877
33.39	0.02463	33.74	0.00201		33.34	0.05674	33.49	0.04585
33.41	0.00493	33.76	0.00402		33.36	0.07447	33.51	0.06017
33.43	0.04433	33.78	0.0161		33.38	0.05674	33.53	0.05731
33.45	0.02956	33.8	0.01408		33.4	0.08156	33.55	0.08883
33.47	0	33.82	0.01006		33.42	0.05319	33.57	0.09169
33.49	0.02956	33.84	0.01006		33.44	0.07801	33.59	0.04585
33.51	0.04433	33.86	0.01207		33.46	0.07092	33.61	0.03438
33.53	0.02463	33.88	0.01811		33.48	0.05319	33.63	0.06304
33.55	0.00985	33.9	0.01207		33.5	0.08156	33.65	0.05444
33.57	0.03448	33.92	0.01207		33.52	0.09574	33.67	0.06877
33.59	0.02956	33.94	0.01408		33.54	0.07801	33.69	0.07163
33.61	0	33.96	0.02616		33.56	0.06028	33.71	0.0659
33.63	0.03448	33.98	0.00805		33.58	0.07447	33.73	0.0659
33.65	0.00493	34	0.01006		33.6	0.02837	33.75	0.07736
33.67	0.0197	34.02	0.00402		33.62	0.06383	33.77	0.03725
33.69	0.02956	34.04	0.01408		33.64	0.0922	33.79	0.0659
33.71	0.03448	34.06	0.01207		33.66	0.06383	33.81	0.06304
33.73	0.02956	34.08	0.02213		33.68	0.04965	33.83	0.07163
33.75	0.03448	34.1	0.00805		33.7	0.06738	33.85	0.05731
33.77	0.02956	34.12	0.01207		33.72	0.06383	33.87	0.04298
33.79	0	34.14	0.01006		33.74	0.0922	33.89	0.05731
33.81	0	34.16	0.00805		33.76	0.06028	33.91	0.06304
33.83	0.00493	34.18	0.01006		33.78	0.04255	33.93	0.07736
33.85	0	34.2	0.01006		33.8	0.06028	33.95	0.07163
33.87	0.02463	34.22	0.02012		33.82	0.05674	33.97	0.06304
33.89	0.06897	34.24	0.00604		33.84	0.05674	33.99	0.06304
33.91	0.03448	34.26	0.0161		33.86	0.07092	34.01	0.04871
33.93	0.01478	34.28	0.00805		33.88	0.03191	34.03	0.0659
33.95	0.04926	34.3	0.01408		33.9	0.06028	34.05	0.09742
33.97	0.02463	34.32	0.0161		33.92	0.07092	34.07	0.06017
33.99	0.00985	34.34	0.02012		33.94	0.04965	34.09	0.0659
34.01	0.04926	34.36	0.02414		33.96	0.03546	34.11	0.03438
34.03	0.00985	34.38	0.01408		33.98	0.05319	34.13	0.06017
34.05	0	34.4	0.01207		34	0.07801	34.15	0.05731
34.07	0.04433	34.42	0.00805		34.02	0.0461	34.17	0.05731
34.09	0	34.44	0.02012		34.04	0.06383	34.19	0.04871
34.11	0.00985	34.46	0.01811		34.06	0.07447	34.21	0.06877
34.13	0.03448	34.48	0.02012		34.08	0.06028	34.23	0.06304
34.15	0	34.5	0.00805		34.1	0.0461	34.25	0.04011
34.17	0.02463	34.52	0.02012		34.12	0.06028	34.27	0.04585
34.19	0.04433	34.54	0.00604		34.14	0.06028	34.29	0.07736
34.21	0.03941	34.56	0.01207		34.16	0.05319	34.31	0.03725
34.23	0.05419	34.58	0.01408		34.18	0.06028	34.33	0.04585
34.25	0.02956	34.6	0.01207		34.2	0.06028	34.35	0.05444
34.27	0	34.62	0.01207		34.22	0.07447	34.37	0.03438
34.29	0	34.64	0.0161		34.24	0.0922	34.39	0.06017
34.31	0	34.66	0.01006		34.26	0.04965	34.41	0.05731
34.33	0.00493	34.68	0.00604		34.28	0.02128	34.43	0.06017
34.35	0.02463	34.7	0.01408		34.3	0.05674	34.45	0.05444
34.37	0	34.72	0.01006		34.32	0.05319	34.47	0.04585
34.39	0.0936	34.74	0.00604		34.34	0.06738	34.49	0.04011
34.41	0.06897	34.76	0.01408		34.36	0.07447	34.51	0.05444
34.43	0.06404	34.78	0.01006		34.38	0.08156	34.53	0.05444
34.45	0.02956	34.8	0.0161		34.4	0.05674	34.55	0.03725
34.47	0	34.82	0.01006		34.42	0.05674	34.57	0.06017
34.49	0.0197	34.84	0.01207		34.44	0.0461	34.59	0.05731
34.51	0.00985	34.86	0.01408		34.46	0.06383	34.61	0.06304
34.53	0.0197	34.88	0.01408		34.48	0.06383	34.63	0.04871
34.55	0	34.9	0.0161		34.5	0.06028	34.65	0.08309
34.57	0	34.92	0.0161		34.52	0.0461	34.67	0.0659
34.59	0	34.94	0.01408		34.54	0.07092	34.69	0.04298
34.61	0.00985	34.96	0.01811		34.56	0.05319	34.71	0.06877
34.63	0.02956	34.98	0.01207		34.58	0.0461	34.73	0.06017
34.65	0.01478	35	0.01207		34.6	0.06383	34.75	0.05731
34.67	0.04926	35.02	0.01207		34.62	0.07092	34.77	0.05444
34.69	0.0197	35.04	0.00805		34.64	0.06028	34.79	0.07163
34.71	0.00493	35.06	0.01006		34.66	0.04965	34.81	0.05444
34.73	0	35.08	0.01207		34.68	0.05319	34.83	0.04011
34.75	0.03448	35.1	0.01408		34.7	0.08511	34.85	0.04585
34.77	0.00985	35.12	0.01006		34.72	0.07092	34.87	0.03725
34.79	0.00985	35.14	0.01408		34.74	0.08156	34.89	0.06304
34.81	0.04433	35.16	0.01006		34.76	0.0461	34.91	0.03152
34.83	0.03941	35.18	0.01408		34.78	0.07801	34.93	0.06304
34.85	0.00493	35.2	0.02414		34.8	0.04965	34.95	0.05158
34.87	0.02956	35.22	0.0161		34.82	0.04965	34.97	0.06304
34.89	0.00985	35.24	0.01207		34.84	0.06028	34.99	0.0745
34.91	0.01478	35.26	0.01207		34.86	0.05674	35.01	0.03152
34.93	0.0197	35.28	0.02213		34.88	0.07092	35.03	0.06304
34.95	0.00985	35.3	0.02414		34.9	0.07801	35.05	0.03152
34.97	0	35.32	0.01006		34.92	0.04965	35.07	0.05158
34.99	0.00985	35.34	0.01811		34.94	0.04255	35.09	0.07736
35.01	0.04926	35.36	0.00604		34.96	0.0461	35.11	0.09169
35.03	0.00985	35.38	0.0161		34.98	0.06028	35.13	0.08023
35.05	0.01478	35.4	0.01811		35	0.04965	35.15	0.05731
35.07	0	35.42	0.01006		35.02	0.07447	35.17	0.04298
35.09	0.05419	35.44	0.01408		35.04	0.04255	35.19	0.05158
35.11	0	35.46	0.01006		35.06	0.04255	35.21	0.05444
35.13	0.01478	35.48	0.01408		35.08	0.04965	35.23	0.0745
35.15	0.03941	35.5	0.00604		35.1	0.0461	35.25	0.04871
35.17	0	35.52	0.01207		35.12	0.07801	35.27	0.08023
35.19	0.00493	35.54	0.02012		35.14	0.04965	35.29	0.07163
35.21	0.01478	35.56	0.02414		35.16	0.05319	35.31	0.06017
35.23	0.00493	35.58	0.01408		35.18	0.0461	35.33	0.05158
35.25	0.03941	35.6	0.00402		35.2	0.04255	35.35	0.07163
35.27	0	35.62	0.02012		35.22	0.03191	35.37	0.05444
35.29	0.02956	35.64	0.01006		35.24	0.07801	35.39	0.04011
35.31	0.01478	35.66	0.00402		35.26	0.0461	35.41	0.07163
35.33	0.01478	35.68	0.01408		35.28	0.06738	35.43	0.06304
35.35	0.02463	35.7	0.0161		35.3	0.06738	35.45	0.06304
35.37	0	35.72	0.02012		35.32	0.06028	35.47	0.04585
35.39	0.02463	35.74	0.00805		35.34	0.07801	35.49	0.07736
35.41	0.00985	35.76	0.00604		35.36	0.03191	35.51	0.05444
35.43	0.02956	35.78	0.01006		35.38	0.05319	35.53	0.05444
35.45	0	35.8	0.01811		35.4	0.07801	35.55	0.04011
35.47	0	35.82	0.01207		35.42	0.0461	35.57	0.04011
35.49	0.0197	35.84	0.01207		35.44	0.05319	35.59	0.04871
35.51	0	35.86	0.0161		35.46	0.05674	35.61	0.06304
35.53	0.00493	35.88	0.01408		35.48	0.09574	35.63	0.04871
35.55	0.0197	35.9	0.01207		35.5	0.04255	35.65	0.06017
35.57	0.00493	35.92	0.00805		35.52	0.08511	35.67	0.07736
35.59	0.02463	35.94	0.00402		35.54	0.07447	35.69	0.07163
35.61	0	35.96	0.01207		35.56	0.05674	35.71	0.05731
35.63	0.02956	35.98	0.01207		35.58	0.05319	35.73	0.04298
35.65	0	36	0.00805		35.6	0.06028	35.75	0.07163
35.67	0.03448	36.02	0.01408		35.62	0.0461	35.77	0.04871
35.69	0.00985	36.04	0.00604		35.64	0.07801	35.79	0.06017
35.71	0.01478	36.06	0.00805		35.66	0.08865	35.81	0.04871
35.73	0	36.08	0.00805		35.68	0.0461	35.83	0.02292
35.75	0.01478	36.1	0.02414		35.7	0.04965	35.85	0.06877
35.77	0.00493	36.12	0.00805		35.72	0.05319	35.87	0.04871
35.79	0.00985	36.14	0.00604		35.74	0.04255	35.89	0.04585
35.81	0	36.16	0.0161		35.76	0.02837	35.91	0.0659
35.83	0.01478	36.18	0.01811		35.78	0.07447	35.93	0.04011
35.85	0.0197	36.2	0.00805		35.8	0.05674	35.95	0.06304
35.87	0	36.22	0.01207		35.82	0.0461	35.97	0.06877
35.89	0.02463	36.24	0.00604		35.84	0.06383	35.99	0.05444
35.91	0	36.26	0.01811		35.86	0.05674	36.01	0.06017
35.93	0	36.28	0.01408		35.88	0.0461	36.03	0.05158
35.95	0	36.3	0.02414		35.9	0.04965	36.05	0.08309
35.97	0.02463	36.32	0.00604		35.92	0.07801	36.07	0.03725
35.99	0.00493	36.34	0.01207		35.94	0.04255	36.09	0.05158
36.01	0.02463	36.36	0.00402		35.96	0.07092	36.11	0.05731
36.03	0.03941	36.38	0.01006		35.98	0.06028	36.13	0.05444
36.05	0.01478	36.4	0.0161		36	0.06738	36.15	0.05158
36.07	0.00985	36.42	0.00201		36.02	0.04255	36.17	0.04871
36.09	0.0197	36.44	0.01408		36.04	0.06028	36.19	0.03725
36.11	0	36.46	0.01207		36.06	0.08156	36.21	0.06017
36.13	0.02956	36.48	0.01207		36.08	0.05674	36.23	0.04011
36.15	0	36.5	0.01408		36.1	0.05319	36.25	0.0659
36.17	0.02463	36.52	0.00604		36.12	0.05319	36.27	0.04871
36.19	0.00493	36.54	0.0161		36.14	0.04255	36.29	0.05158
36.21	0.0197	36.56	0.00805		36.16	0.06383	36.31	0.07163
36.23	0.03941	36.58	0.01207		36.18	0.0461	36.33	0.0659
36.25	0	36.6	0.01207		36.2	0.06028	36.35	0.04298
36.27	0.00985	36.62	0.01811		36.22	0.06738	36.37	0.05731
36.29	0.01478	36.64	0.01006		36.24	0.07092	36.39	0.05731
36.31	0	36.66	0.02213		36.26	0.07801	36.41	0.06017
36.33	0.00985	36.68	0.00402		36.28	0.06028	36.43	0.0745
36.35	0	36.7	0.02213		36.3	0.0461	36.45	0.06304
36.37	0.0197	36.72	0.01006		36.32	0.03546	36.47	0.04298
36.39	0.0197	36.74	0.01006		36.34	0.06028	36.49	0.04298
36.41	0	36.76	0.02012		36.36	0.04255	36.51	0.0659
36.43	0.00985	36.78	0		36.38	0.05674	36.53	0.03152
36.45	0.03941	36.8	0.01811		36.4	0.03901	36.55	0.04298
36.47	0.01478	36.82	0.0161		36.42	0.07092	36.57	0.04298
36.49	0.05911	36.84	0.02012		36.44	0.03901	36.59	0.0745
36.51	0.00985	36.86	0.01006		36.46	0.04255	36.61	0.05444
36.53	0.03941	36.88	0.01006		36.48	0.06028	36.63	0.05444
36.55	0.01478	36.9	0.01408		36.5	0.03901	36.65	0.05158
36.57	0.03941	36.92	0.00805		36.52	0.06383	36.67	0.05444
36.59	0.00493	36.94	0.00604		36.54	0.06738	36.69	0.0745
36.61	0.02463	36.96	0.00604		36.56	0.06738	36.71	0.04871
36.63	0	36.98	0.01408		36.58	0.0461	36.73	0.04298
36.65	0	37	0.0161		36.6	0.06383	36.75	0.06017
36.67	0	37.02	0.01408		36.62	0.06028	36.77	0.04585
36.69	0.02956	37.04	0.02616		36.64	0.07801	36.79	0.05444
36.71	0.00493	37.06	0.01207		36.66	0.08865	36.81	0.04585
36.73	0.03448	37.08	0.00402		36.68	0.03191	36.83	0.04011
36.75	0	37.1	0.01207		36.7	0.06383	36.85	0.05731
36.77	0	37.12	0.0161		36.72	0.05319	36.87	0.07736
36.79	0.02463	37.14	0.00604		36.74	0.05319	36.89	0.03725
36.81	0	37.16	0.00805		36.76	0.04255	36.91	0.04585
36.83	0	37.18	0.00604		36.78	0.03901	36.93	0.05444
36.85	0.03941	37.2	0.01408		36.8	0.05319	36.95	0.04298
36.87	0	37.22	0.00805		36.82	0.03546	36.97	0.05158
36.89	0.00493	37.24	0.01006		36.84	0.08156	36.99	0.03725
36.91	0.02956	37.26	0.01408		36.86	0.0461	37.01	0.05444
36.93	0.02956	37.28	0.01408		36.88	0.07092	37.03	0.04011
36.95	0.02463	37.3	0.00805		36.9	0.04965	37.05	0.04871
36.97	0.00493	37.32	0.01006		36.92	0.06738	37.07	0.02865
36.99	0	37.34	0.00805		36.94	0.0461	37.09	0.04298
37.01	0	37.36	0.02012		36.96	0.04255	37.11	0.03725
37.03	0	37.38	0.00805		36.98	0.05674	37.13	0.04871
37.05	0	37.4	0.01006		37	0.03901	37.15	0.04298
37.07	0.01478	37.42	0.0161		37.02	0.05319	37.17	0.04298
37.09	0.04433	37.44	0.02012		37.04	0.07092	37.19	0.04011
37.11	0.01478	37.46	0.00604		37.06	0.06028	37.21	0.05444
37.13	0.02463	37.48	0.01006		37.08	0.05319	37.23	0.04871
37.15	0	37.5	0.01408		37.1	0.03901	37.25	0.04871
37.17	0.02463	37.52	0.00805		37.12	0.03901	37.27	0.05158
37.19	0.00493	37.54	0.00604		37.14	0.05319	37.29	0.04011
37.21	0.0197	37.56	0.01811		37.16	0.04255	37.31	0.0659
37.23	0.00985	37.58	0.01408		37.18	0.07092	37.33	0.04298
37.25	0.00985	37.6	0.01207		37.2	0.03546	37.35	0.05444
37.27	0.02956	37.62	0.0161		37.22	0.0461	37.37	0.04871
37.29	0.03448	37.64	0.0161		37.24	0.03191	37.39	0.05158
37.31	0	37.66	0.02414		37.26	0.03191	37.41	0.04871
37.33	0.00493	37.68	0.01408		37.28	0.04255	37.43	0.05158
37.35	0.0197	37.7	0.00604		37.3	0.03901	37.45	0.03725
37.37	0.02956	37.72	0.00604		37.32	0.04255	37.47	0.03438
37.39	0.0197	37.74	0.02012		37.34	0.02482	37.49	0.04298
37.41	0.0197	37.76	0.01006		37.36	0.05674	37.51	0.04011
37.43	0.00493	37.78	0.01811		37.38	0.04255	37.53	0.0745
37.45	0.00493	37.8	0.01006		37.4	0.04965	37.55	0.05444
37.47	0.02956	37.82	0.01207		37.42	0.08511	37.57	0.04871
37.49	0	37.84	0.0161		37.44	0.04255	37.59	0.04585
37.51	0.01478	37.86	0.0161		37.46	0.03546	37.61	0.06304
37.53	0.0197	37.88	0.0161		37.48	0.03546	37.63	0.05444
37.55	0.02463	37.9	0.0161		37.5	0.06383	37.65	0.03152
37.57	0.0197	37.92	0.01006		37.52	0.04255	37.67	0.03152
37.59	0	37.94	0.01006		37.54	0.0461	37.69	0.04298
37.61	0	37.96	0.01408		37.56	0.04965	37.71	0.04585
37.63	0	37.98	0.01408		37.58	0.06383	37.73	0.0659
37.65	0.00985	38	0.01006		37.6	0.07801	37.75	0.04585
37.67	0.0197	38.02	0.01207		37.62	0.03901	37.77	0.05731
37.69	0.02956	38.04	0.0161		37.64	0.03546	37.79	0.04585
37.71	0.00493	38.06	0.02012		37.66	0.04965	37.81	0.01433
37.73	0.06897	38.08	0.00805		37.68	0.05319	37.83	0.04585
37.75	0.00985	38.1	0.01408		37.7	0.0461	37.85	0.02865
37.77	0.01478	38.12	0.01006		37.72	0.04255	37.87	0.04585
37.79	0.01478	38.14	0.00805		37.74	0.07447	37.89	0.04298
37.81	0.0197	38.16	0.00805		37.76	0.07801	37.91	0.05444
37.83	0.02463	38.18	0.01207		37.78	0.07092	37.93	0.05158
37.85	0.04926	38.2	0.00604		37.8	0.03546	37.95	0.04298
37.87	0	38.22	0.01811		37.82	0.07092	37.97	0.04011
37.89	0.01478	38.24	0.02213		37.84	0.04965	37.99	0.06017
37.91	0	38.26	0.00201		37.86	0.05674	38.01	0.03152
37.93	0	38.28	0.00201		37.88	0.03901	38.03	0.04011
37.95	0	38.3	0.01811		37.9	0.04965	38.05	0.03438
37.97	0.00985	38.32	0.01408		37.92	0.03901	38.07	0.04011
37.99	0.04433	38.34	0.01408		37.94	0.05319	38.09	0.05158
38.01	0	38.36	0.03018		37.96	0.06028	38.11	0.03725
38.03	0.01478	38.38	0.0161		37.98	0.03191	38.13	0.05158
38.05	0.00985	38.4	0.01811		38	0.07092	38.15	0.03725
38.07	0.01478	38.42	0.01408		38.02	0.03191	38.17	0.05444
38.09	0	38.44	0.01408		38.04	0.06738	38.19	0.05158
38.11	0.03448	38.46	0.01006		38.06	0.07447	38.21	0.04011
38.13	0	38.48	0.01408		38.08	0.03546	38.23	0.05731
38.15	0.0197	38.5	0.01006		38.1	0.08156	38.25	0.02865
38.17	0.02956	38.52	0.01811		38.12	0.07447	38.27	0.05444
38.19	0.04926	38.54	0.01207		38.14	0.04255	38.29	0.0659
38.21	0.00493	38.56	0.00604		38.16	0.03191	38.31	0.0745
38.23	0	38.58	0.01408		38.18	0.0461	38.33	0.04011
38.25	0.04433	38.6	0.0161		38.2	0.03901	38.35	0.03725
38.27	0.01478	38.62	0.01006		38.22	0.02837	38.37	0.04011
38.29	0.00985	38.64	0.01006		38.24	0.02482	38.39	0.06304
38.31	0.02956	38.66	0.00604		38.26	0.04255	38.41	0.04011
38.33	0.03941	38.68	0.0161		38.28	0.06383	38.43	0.04871
38.35	0.01478	38.7	0.01006		38.3	0.04255	38.45	0.06017
38.37	0.00985	38.72	0.00805		38.32	0.03191	38.47	0.04871
38.39	0	38.74	0.00805		38.34	0.03901	38.49	0.06304
38.41	0.0197	38.76	0.0161		38.36	0.04965	38.51	0.04298
38.43	0.00493	38.78	0.01811		38.38	0.05674	38.53	0.04011
38.45	0	38.8	0.02012		38.4	0.06738	38.55	0.05158
38.47	0.01478	38.82	0.01207		38.42	0.02837	38.57	0.01719
38.49	0.00985	38.84	0.01006		38.44	0.06028	38.59	0.03725
38.51	0.0197	38.86	0.01006		38.46	0.02837	38.61	0.04871
38.53	0.01478	38.88	0.01207		38.48	0.03901	38.63	0.03725
38.55	0	38.9	0.02213		38.5	0.02837	38.65	0.02579
38.57	0	38.92	0.00402		38.52	0.07092	38.67	0.03725
38.59	0	38.94	0.01408		38.54	0.04965	38.69	0.02579
38.61	0.01478	38.96	0.00201		38.56	0.03901	38.71	0.03725
38.63	0.0197	38.98	0.0161		38.58	0.03546	38.73	0.04871
38.65	0.00493	39	0.00805		38.6	0.02837	38.75	0.04011
38.67	0.00985	39.02	0.00604		38.62	0.03546	38.77	0.05731
38.69	0	39.04	0.01006		38.64	0.03901	38.79	0.05731
38.71	0.02463	39.06	0.01006		38.66	0.08865	38.81	0.04011
38.73	0.00493	39.08	0.01408		38.68	0.04965	38.83	0.04011
38.75	0.03941	39.1	0.02213		38.7	0.05319	38.85	0.04871
38.77	0	39.12	0.00604		38.72	0.02837	38.87	0.04585
38.79	0.00493	39.14	0.01408		38.74	0.03901	38.89	0.02865
38.81	0.01478	39.16	0.01207		38.76	0.02837	38.91	0.04298
38.83	0.00985	39.18	0.01207		38.78	0.0461	38.93	0.04298
38.85	0.03448	39.2	0.02817		38.8	0.02837	38.95	0.05158
38.87	0.0197	39.22	0.01207		38.82	0.04255	38.97	0.05158
38.89	0	39.24	0.00402		38.84	0.02482	38.99	0.03725
38.91	0.00985	39.26	0.01006		38.86	0.0461	39.01	0.03438
38.93	0.02956	39.28	0.01408		38.88	0.04255	39.03	0.04011
38.95	0.01478	39.3	0.01408		38.9	0.04965	39.05	0.05444
38.97	0.03941	39.32	0.01207		38.92	0.03546	39.07	0.04585
38.99	0	39.34	0.01207		38.94	0.0461	39.09	0.04585
39.01	0	39.36	0.00805		38.96	0.0461	39.11	0.02579
39.03	0	39.38	0.02012		38.98	0.05674	39.13	0.04871
39.05	0	39.4	0.01207		39	0.03191	39.15	0.04298
39.07	0	39.42	0.01006		39.02	0.03191	39.17	0.04298
39.09	0.01478	39.44	0.00805		39.04	0.05319	39.19	0.03438
39.11	0.00493	39.46	0.01207		39.06	0.03901	39.21	0.04298
39.13	0.04926	39.48	0.00402		39.08	0.08865	39.23	0.03438
39.15	0.02956	39.5	0.01006		39.1	0.04965	39.25	0.02579
39.17	0.01478	39.52	0.01207		39.12	0.0461	39.27	0.05158
39.19	0	39.54	0.01207		39.14	0.04965	39.29	0.04011
39.21	0.00985	39.56	0.01006		39.16	0.04965	39.31	0.06017
39.23	0	39.58	0.02012		39.18	0.04965	39.33	0.04298
39.25	0	39.6	0.01207		39.2	0.05674	39.35	0.03438
39.27	0	39.62	0.01408		39.22	0.07092	39.37	0.02292
39.29	0.02463	39.64	0.00805		39.24	0.06383	39.39	0.03725
39.31	0.0197	39.66	0.01408		39.26	0.01773	39.41	0.03725
39.33	0.00985	39.68	0.02213		39.28	0.04255	39.43	0.01433
39.35	0.01478	39.7	0.00805		39.3	0.03901	39.45	0.05158
39.37	0.01478	39.72	0.01006		39.32	0.04255	39.47	0.04585
39.39	0	39.74	0.02213		39.34	0.05319	39.49	0.07163
39.41	0.01478	39.76	0.00402		39.36	0.04255	39.51	0.02865
39.43	0.00493	39.78	0.00201		39.38	0.05319	39.53	0.03725
39.45	0.00493	39.8	0.01006		39.4	0.04255	39.55	0.04585
39.47	0.02956	39.82	0.02012		39.42	0.02837	39.57	0.04585
39.49	0	39.84	0.01006		39.44	0.0461	39.59	0.04011
39.51	0.02956	39.86	0.01408		39.46	0.03901	39.61	0.03725
39.53	0.02463	39.88	0.01207		39.48	0.03901	39.63	0.06017
39.55	0.02956	39.9	0.00805		39.5	0.01418	39.65	0.04585
39.57	0	39.92	0.01408		39.52	0.07092	39.67	0.03152
39.59	0.03941	39.94	0.01006		39.54	0.06383	39.69	0.04011
39.61	0.01478	39.96	0.02012		39.56	0.03546	39.71	0.03725
39.63	0.00985	39.98	0.0161		39.58	0.06383	39.73	0.06017
39.65	0.01478	40	0.01207		39.6	0.04965	39.75	0.04298
39.67	0.01478	40.02	0.00805		39.62	0.01773	39.77	0.06017
39.69	0.00493	40.04	0.01408		39.64	0.03191	39.79	0.03438
39.71	0	40.06	0.02414		39.66	0.05319	39.81	0.04871
39.73	0	40.08	0.01006		39.68	0.03546	39.83	0.03152
39.75	0	40.1	0.01408		39.7	0.04965	39.85	0.06304
39.77	0	40.12	0.01006		39.72	0.02837	39.87	0.04585
39.79	0	40.14	0.01207		39.74	0.03901	39.89	0.06877
39.81	0.05911	40.16	0.01408		39.76	0.05319	39.91	0.06017
39.83	0.00985	40.18	0.01408		39.78	0.02837	39.93	0.04871
39.85	0.03941	40.2	0.01006		39.8	0.04965	39.95	0.04298
39.87	0.00985	40.22	0.00805		39.82	0.05674	39.97	0.06304
39.89	0.01478	40.24	0.00402		39.84	0.04965	39.99	0.04011
39.91	0	40.26	0.00805		39.86	0.06383	40.01	0.04871
39.93	0	40.28	0.00805		39.88	0.05319	40.03	0.04298
39.95	0	40.3	0.01207		39.9	0.05674	40.05	0.04298
39.97	0	40.32	0.0161		39.92	0.0461	40.07	0.02579
39.99	0.00985	40.34	0.01207		39.94	0.0461	40.09	0.04011
40.01	0.0197	40.36	0.02012		39.96	0.05674	40.11	0.05731
40.03	0.02463	40.38	0.01006		39.98	0.03901	40.13	0.04011
40.05	0.00985	40.4	0.00201		40	0.03546	40.15	0.06877
40.07	0.03448	40.42	0.01408		40.02	0.04255	40.17	0.05158
40.09	0.0197	40.44	0.01408		40.04	0.03901	40.19	0.04011
40.11	0.00985	40.46	0.01811		40.06	0.0461	40.21	0.04011
40.13	0	40.48	0.00805		40.08	0.05319	40.23	0.06017
40.15	0.01478	40.5	0.00805		40.1	0.04965	40.25	0.04011
40.17	0	40.52	0.0161		40.12	0.06383	40.27	0.03725
40.19	0.0197	40.54	0.01408		40.14	0.07092	40.29	0.05158
40.21	0.02463	40.56	0.03219		40.16	0.02837	40.31	0.04871
40.23	0.01478	40.58	0.01207		40.18	0.03901	40.33	0.04585
40.25	0.01478	40.6	0.01006		40.2	0.0461	40.35	0.05731
40.27	0.00493	40.62	0.01006		40.22	0.02128	40.37	0.04585
40.29	0	40.64	0.00805		40.24	0.03901	40.39	0.05158
40.31	0.0197	40.66	0.0161		40.26	0.04965	40.41	0.04871
40.33	0.0197	40.68	0.01811		40.28	0.03901	40.43	0.04011
40.35	0.00985	40.7	0.01408		40.3	0.06383	40.45	0.06017
40.37	0	40.72	0.01408		40.32	0.05319	40.47	0.05731
40.39	0	40.74	0.01207		40.34	0.05674	40.49	0.04298
40.41	0.0197	40.76	0.02817		40.36	0.06028	40.51	0.05731
40.43	0	40.78	0.00604		40.38	0.06028	40.53	0.05158
40.45	0.05419	40.8	0.00805		40.4	0.06383	40.55	0.04298
40.47	0.01478	40.82	0.00805		40.42	0.04965	40.57	0.04871
40.49	0	40.84	0.00604		40.44	0.06738	40.59	0.04298
40.51	0.02956	40.86	0.00805		40.46	0.03191	40.61	0.02579
40.53	0.01478	40.88	0.01207		40.48	0.05319	40.63	0.02292
40.55	0	40.9	0.01207		40.5	0.03191	40.65	0.06304
40.57	0	40.92	0.02012		40.52	0.02837	40.67	0.06017
40.59	0.02956	40.94	0.00805		40.54	0.04255	40.69	0.03438
40.61	0	40.96	0.0161		40.56	0.08511	40.71	0.04585
40.63	0	40.98	0.01006		40.58	0.02482	40.73	0.05158
40.65	0.00493	41	0.01408		40.6	0.04965	40.75	0.05444
40.67	0	41.02	0.0161		40.62	0.05319	40.77	0.04011
40.69	0.01478	41.04	0.00402		40.64	0.03191	40.79	0.05444
40.71	0	41.06	0.02012		40.66	0.03901	40.81	0.04871
40.73	0.03448	41.08	0.01207		40.68	0.06028	40.83	0.02292
40.75	0	41.1	0.01207		40.7	0.04255	40.85	0.03725
40.77	0.01478	41.12	0.02012		40.72	0.02837	40.87	0.04585
40.79	0.01478	41.14	0.00805		40.74	0.02837	40.89	0.04871
40.81	0.01478	41.16	0.01408		40.76	0.06383	40.91	0.06017
40.83	0.00493	41.18	0.01408		40.78	0.07092	40.93	0.05444
40.85	0.03941	41.2	0.01006		40.8	0.07801	40.95	0.0659
40.87	0.00985	41.22	0.0161		40.82	0.06383	40.97	0.02865
40.89	0	41.24	0.01207		40.84	0.08865	40.99	0.05731
40.91	0.0197	41.26	0.01006		40.86	0.05674	41.01	0.04871
40.93	0	41.28	0.02012		40.88	0.08156	41.03	0.05444
40.95	0	41.3	0.0161		40.9	0.07092	41.05	0.04585
40.97	0	41.32	0.01207		40.92	0.07092	41.07	0.03152
40.99	0	41.34	0.0161		40.94	0.04965	41.09	0.04585
41.01	0	41.36	0.01006		40.96	0.05674	41.11	0.05444
41.03	0.07389	41.38	0.02012		40.98	0.07092	41.13	0.05158
41.05	0.02463	41.4	0.01408		41	0.04965	41.15	0.06017
41.07	0.02956	41.42	0.0161		41.02	0.02837	41.17	0.0659
41.09	0.05911	41.44	0.01811		41.04	0.06738	41.19	0.05731
41.11	0.00493	41.46	0.0161		41.06	0.06028	41.21	0.04298
41.13	0	41.48	0.01408		41.08	0.05319	41.23	0.03725
41.15	0	41.5	0.01408		41.1	0.04255	41.25	0.05158
41.17	0	41.52	0.0161		41.12	0.0461	41.27	0.04011
41.19	0	41.54	0.01811		41.14	0.07092	41.29	0.04585
41.21	0	41.56	0.02012		41.16	0.04965	41.31	0.05158
41.23	0.01478	41.58	0.00201		41.18	0.06383	41.33	0.04298
41.25	0.02463	41.6	0.01408		41.2	0.06383	41.35	0.04585
41.27	0.03941	41.62	0.0161		41.22	0.03546	41.37	0.06304
41.29	0.05419	41.64	0.0161		41.24	0.04965	41.39	0.04585
41.31	0.02463	41.66	0.0161		41.26	0.04965	41.41	0.02865
41.33	0.00985	41.68	0.01006		41.28	0.07092	41.43	0.0659
41.35	0	41.7	0.02817		41.3	0.05674	41.45	0.03438
41.37	0	41.72	0.01408		41.32	0.0461	41.47	0.03725
41.39	0	41.74	0.0161		41.34	0.06383	41.49	0.03725
41.41	0.01478	41.76	0.01207		41.36	0.04965	41.51	0.03152
41.43	0.00493	41.78	0.01408		41.38	0.04965	41.53	0.05731
41.45	0.0197	41.8	0.01207		41.4	0.03546	41.55	0.04585
41.47	0	41.82	0.00402		41.42	0.03901	41.57	0.03152
41.49	0.00493	41.84	0.01811		41.44	0.07092	41.59	0.03725
41.51	0.01478	41.86	0.01408		41.46	0.06028	41.61	0.03152
41.53	0.02463	41.88	0.01408		41.48	0.05674	41.63	0.0659
41.55	0.01478	41.9	0.01006		41.5	0.03901	41.65	0.03725
41.57	0	41.92	0.01811		41.52	0.06028	41.67	0.06877
41.59	0.00985	41.94	0.01811		41.54	0.06383	41.69	0.05731
41.61	0.00493	41.96	0.01811		41.56	0.04255	41.71	0.02865
41.63	0.02463	41.98	0.01207		41.58	0.02128	41.73	0.06304
41.65	0	42	0.02213		41.6	0.04965	41.75	0.04585
41.67	0	42.02	0.0161		41.62	0.06383	41.77	0.04011
41.69	0	42.04	0.00604		41.64	0.03191	41.79	0.05158
41.71	0.00493	42.06	0.00604		41.66	0.03901	41.81	0.05158
41.73	0	42.08	0.01408		41.68	0.07447	41.83	0.05731
41.75	0.03941	42.1	0.01811		41.7	0.03901	41.85	0.06017
41.77	0.0197	42.12	0.00805		41.72	0.07447	41.87	0.03438
41.79	0.03941	42.14	0.01006		41.74	0.07092	41.89	0.04011
41.81	0.0197	42.16	0.00805		41.76	0.03191	41.91	0.02579
41.83	0.03448	42.18	0.01811		41.78	0.02128	41.93	0.04585
41.85	0.02463	42.2	0.01207		41.8	0.03546	41.95	0.05444
41.87	0.00985	42.22	0.01207		41.82	0.08156	41.97	0.02865
41.89	0.00493	42.24	0.0161		41.84	0.04255	41.99	0.03725
41.91	0	42.26	0.01006		41.86	0.04965	42.01	0.04871
41.93	0.01478	42.28	0.01207		41.88	0.07092	42.03	0.03725
41.95	0.03941	42.3	0.00604		41.9	0.04965	42.05	0.05444
41.97	0.02956	42.32	0.01207		41.92	0.04965	42.07	0.06877
41.99	0.00493	42.34	0.01207		41.94	0.06738	42.09	0.04011
42.01	0.02956	42.36	0.0161		41.96	0.03901	42.11	0.06017
42.03	0.0197	42.38	0.0161		41.98	0.05319	42.13	0.03152
42.05	0.03448	42.4	0.03018		42	0.04255	42.15	0.04298
42.07	0	42.42	0.00201		42.02	0.03191	42.17	0.03725
42.09	0.0197	42.44	0.02213		42.04	0.04255	42.19	0.03152
42.11	0.00493	42.46	0.01207		42.06	0.06383	42.21	0.06304
42.13	0	42.48	0.02414		42.08	0.07092	42.23	0.05444
42.15	0.0197	42.5	0.0161		42.1	0.03191	42.25	0.04871
42.17	0.02463	42.52	0.01207		42.12	0.02482	42.27	0.05444
42.19	0.04433	42.54	0.01811		42.14	0.04255	42.29	0.0659
42.21	0	42.56	0.00402		42.16	0.04255	42.31	0.06017
42.23	0.00985	42.58	0.02012		42.18	0.05319	42.33	0.04585
42.25	0	42.6	0.0161		42.2	0.05319	42.35	0.02865
42.27	0.0197	42.62	0.03219		42.22	0.05319	42.37	0.04871
42.29	0.00985	42.64	0.02012		42.24	0.06028	42.39	0.05158
42.31	0.00493	42.66	0.01207		42.26	0.08156	42.41	0.03438
42.33	0.02463	42.68	0.02012		42.28	0.07092	42.43	0.04871
42.35	0.00985	42.7	0.01207		42.3	0.04965	42.45	0.04298
42.37	0.04926	42.72	0.01207		42.32	0.03901	42.47	0.02292
42.39	0	42.74	0.01207		42.34	0.04965	42.49	0.04871
42.41	0.01478	42.76	0.02213		42.36	0.04965	42.51	0.05731
42.43	0.08374	42.78	0.02616		42.38	0.04255	42.53	0.04871
42.45	0.00985	42.8	0.01207		42.4	0.03901	42.55	0.05444
42.47	0.0197	42.82	0.01207		42.42	0.03901	42.57	0.03438
42.49	0.00985	42.84	0.02012		42.44	0.04965	42.59	0.06877
42.51	0	42.86	0.01006		42.46	0.05674	42.61	0.04871
42.53	0	42.88	0.0161		42.48	0.07092	42.63	0.06017
42.55	0.03448	42.9	0.0161		42.5	0.08511	42.65	0.04585
42.57	0	42.92	0.02012		42.52	0.05674	42.67	0.05158
42.59	0.01478	42.94	0.02616		42.54	0.06028	42.69	0.04298
42.61	0.04926	42.96	0.02213		42.56	0.05319	42.71	0.04585
42.63	0.01478	42.98	0.02012		42.58	0.06738	42.73	0.06304
42.65	0.03941	43	0.02817		42.6	0.03546	42.75	0.04871
42.67	0.05419	43.02	0.0161		42.62	0.06738	42.77	0.05444
42.69	0	43.04	0.02616		42.64	0.07092	42.79	0.04871
42.71	0	43.06	0.02012		42.66	0.04965	42.81	0.04871
42.73	0	43.08	0.01408		42.68	0.04255	42.83	0.02865
42.75	0.00985	43.1	0.00805		42.7	0.05319	42.85	0.08023
42.77	0	43.12	0.01811		42.72	0.02837	42.87	0.06304
42.79	0.00985	43.14	0.02213		42.74	0.04255	42.89	0.04871
42.81	0.01478	43.16	0.02012		42.76	0.03191	42.91	0.04298
42.83	0.07389	43.18	0.01408		42.78	0.06028	42.93	0.02292
42.85	0	43.2	0.0161		42.8	0.03546	42.95	0.03438
42.87	0.00985	43.22	0.02012		42.82	0.06738	42.97	0.04298
42.89	0	43.24	0.03421		42.84	0.07092	42.99	0.02865
42.91	0.02463	43.26	0.0161		42.86	0.07801	43.01	0.04298
42.93	0.00985	43.28	0.0161		42.88	0.07801	43.03	0.04298
42.95	0.02463	43.3	0.01408		42.9	0.07092	43.05	0.04298
42.97	0.00985	43.32	0.02414		42.92	0.05319	43.07	0.04011
42.99	0.03448	43.34	0.02012		42.94	0.07092	43.09	0.04011
43.01	0	43.36	0.01408		42.96	0.04965	43.11	0.05158
43.03	0	43.38	0.01811		42.98	0.03901	43.13	0.06877
43.05	0.01478	43.4	0.00805		43	0.07092	43.15	0.04298
43.07	0.02463	43.42	0.01811		43.02	0.06028	43.17	0.04011
43.09	0.0197	43.44	0.01408		43.04	0.07092	43.19	0.04585
43.11	0	43.46	0.02213		43.06	0.05674	43.21	0.04298
43.13	0.03448	43.48	0.00805		43.08	0.05674	43.23	0.03438
43.15	0.03448	43.5	0.02616		43.1	0.08511	43.25	0.04011
43.17	0.03448	43.52	0.02414		43.12	0.07447	43.27	0.06017
43.19	0.00985	43.54	0.01408		43.14	0.05319	43.29	0.06017
43.21	0.0197	43.56	0.0161		43.16	0.06383	43.31	0.03152
43.23	0.02463	43.58	0.03421		43.18	0.06383	43.33	0.03725
43.25	0.01478	43.6	0.02414		43.2	0.05319	43.35	0.03725
43.27	0.02463	43.62	0.02012		43.22	0.06028	43.37	0.02865
43.29	0.00985	43.64	0.02414		43.24	0.06383	43.39	0.03438
43.31	0.03448	43.66	0.02213		43.26	0.04965	43.41	0.05158
43.33	0.03941	43.68	0.02012		43.28	0.07447	43.43	0.0659
43.35	0.04433	43.7	0.02012		43.3	0.09574	43.45	0.05444
43.37	0.0197	43.72	0.03421		43.32	0.04255	43.47	0.06017
43.39	0.0197	43.74	0.02414		43.34	0.06028	43.49	0.04871
43.41	0.00985	43.76	0.03421		43.36	0.06738	43.51	0.05444
43.43	0	43.78	0.01811		43.38	0.05319	43.53	0.03438
43.45	0.05419	43.8	0.03018		43.4	0.06383	43.55	0.04585
43.47	0.03448	43.82	0.02213		43.42	0.06383	43.57	0.04871
43.49	0	43.84	0.02414		43.44	0.06028	43.59	0.04298
43.51	0.02956	43.86	0.02616		43.46	0.05674	43.61	0.06877
43.53	0.00493	43.88	0.04225		43.48	0.0461	43.63	0.06017
43.55	0.0197	43.9	0.02817		43.5	0.05319	43.65	0.03725
43.57	0.02463	43.92	0.03823		43.52	0.06028	43.67	0.04585
43.59	0	43.94	0.03219		43.54	0.08865	43.69	0.06017
43.61	0.02956	43.96	0.03018		43.56	0.06738	43.71	0.05444
43.63	0.04433	43.98	0.03018		43.58	0.06028	43.73	0.06304
43.65	0.02956	44	0.04628		43.6	0.03901	43.75	0.08883
43.67	0.02463	44.02	0.0503		43.62	0.07447	43.77	0.06017
43.69	0.04433	44.04	0.03219		43.64	0.05319	43.79	0.0745
43.71	0.04926	44.06	0.04024		43.66	0.07092	43.81	0.03438
43.73	0.03448	44.08	0.04225		43.68	0.05674	43.83	0.04011
43.75	0.02956	44.1	0.03823		43.7	0.06383	43.85	0.04585
43.77	0.03941	44.12	0.05231		43.72	0.06738	43.87	0.05158
43.79	0.04433	44.14	0.06036		43.74	0.09574	43.89	0.05731
43.81	0	44.16	0.05835		43.76	0.05674	43.91	0.03725
43.83	0.0197	44.18	0.06841		43.78	0.06383	43.93	0.04011
43.85	0.02956	44.2	0.0503		43.8	0.10284	43.95	0.04871
43.87	0	44.22	0.07243		43.82	0.09574	43.97	0.08023
43.89	0.02956	44.24	0.07646		43.84	0.10993	43.99	0.05731
43.91	0.03448	44.26	0.07847		43.86	0.05674	44.01	0.05444
43.93	0.08867	44.28	0.10865		43.88	0.0922	44.03	0.04585
43.95	0.03448	44.3	0.10262		43.9	0.07801	44.05	0.04298
43.97	0.12808	44.32	0.12072		43.92	0.08156	44.07	0.06017
43.99	0.06897	44.34	0.14085		43.94	0.0922	44.09	0.06017
44.01	0.08374	44.36	0.14889		43.96	0.09574	44.11	0.04298
44.03	0.06897	44.38	0.1831		43.98	0.0922	44.13	0.0659
44.05	0.07389	44.4	0.20523		44	0.14539	44.15	0.08309
44.07	0.06897	44.42	0.25553		44.02	0.17021	44.17	0.06304
44.09	0.05419	44.44	0.32596		44.04	0.11348	44.19	0.0659
44.11	0.10837	44.46	0.40845		44.06	0.14539	44.21	0.06017
44.13	0.06404	44.48	0.45875		44.08	0.15248	44.23	0.07736
44.15	0.08374	44.5	0.62978		44.1	0.21631	44.25	0.07736
44.17	0.14778	44.52	0.7163		44.12	0.20922	44.27	0.09742
44.19	0.1133	44.54	0.81891		44.14	0.26241	44.29	0.08023
44.21	0.17734	44.56	0.82495		44.16	0.21986	44.31	0.10315
44.23	0.18227	44.58	1		44.18	0.35106	44.33	0.14327
44.25	0.19212	44.6	0.90946		44.2	0.34397	44.35	0.16046
44.27	0.23645	44.62	0.88531		44.22	0.38298	44.37	0.1404
44.29	0.31527	44.64	0.78873		44.24	0.40426	44.39	0.20917
44.31	0.44335	44.66	0.68813		44.26	0.52482	44.41	0.26361
44.33	0.44828	44.68	0.74447		44.28	0.55674	44.43	0.25788
44.35	0.55172	44.7	0.59155		44.3	0.7234	44.45	0.31519
44.37	0.63547	44.72	0.55936		44.32	0.75177	44.47	0.44699
44.39	0.72906	44.74	0.45473		44.34	0.87589	44.49	0.53009
44.41	0.82266	44.76	0.37022		44.36	0.93262	44.51	0.69054
44.43	0.77833	44.78	0.29577		44.38	0.97163	44.53	0.73926
44.45	0.88177	44.8	0.26761		44.4	0.98227	44.55	0.89971
44.47	0.91133	44.82	0.20523		44.42	1	44.57	0.94556
44.49	0.87685	44.84	0.16097		44.44	0.98936	44.59	1
44.51	1	44.86	0.11469		44.46	0.84752	44.61	0.9255
44.53	0.96059	44.88	0.1167		44.48	0.85106	44.63	0.90258
44.55	0.80788	44.9	0.09256		44.5	0.86525	44.65	0.89398
44.57	0.75369	44.92	0.09054		44.52	0.67376	44.67	0.75931
44.59	0.79803	44.94	0.06036		44.54	0.71277	44.69	0.70487
44.61	0.61084	44.96	0.05231		44.56	0.50709	44.71	0.52436
44.63	0.41379	44.98	0.05433		44.58	0.47872	44.73	0.54728
44.65	0.19704	45	0.06439		44.6	0.46454	44.75	0.46132
44.67	0.28571	45.02	0.03823		44.62	0.29787	44.77	0.3639
44.69	0.23153	45.04	0.05433		44.64	0.28014	44.79	0.33524
44.71	0.05419	45.06	0.04225		44.66	0.28723	44.81	0.20057
44.73	0.17734	45.08	0.03219		44.68	0.2234	44.83	0.24069
44.75	0.24138	45.1	0.03823		44.7	0.1844	44.85	0.13754
44.77	0.23153	45.12	0.04024		44.72	0.16312	44.87	0.12321
44.79	0.12315	45.14	0.04225		44.74	0.13475	44.89	0.09742
44.81	0.12315	45.16	0.04024		44.76	0.12766	44.91	0.11461
44.83	0.13793	45.18	0.01811		44.78	0.14894	44.93	0.10602
44.85	0.07389	45.2	0.03219		44.8	0.13475	44.95	0.08023
44.87	0	45.22	0.04225		44.82	0.10993	44.97	0.10888
44.89	0.02463	45.24	0.02616		44.84	0.11702	44.99	0.06017
44.91	0.08374	45.26	0.02414		44.86	0.10284	45.01	0.07163
44.93	0	45.28	0.04024		44.88	0.11348	45.03	0.0745
44.95	0.06404	45.3	0.01811		44.9	0.09574	45.05	0.0659
44.97	0.06897	45.32	0.02817		44.92	0.08156	45.07	0.04585
44.99	0.05911	45.34	0.03018		44.94	0.07801	45.09	0.06017
45.01	0.10345	45.36	0.01811		44.96	0.05674	45.11	0.06017
45.03	0.0197	45.38	0.03421		44.98	0.10638	45.13	0.06017
45.05	0.04926	45.4	0.03018		45	0.0922	45.15	0.04011
45.07	0.02956	45.42	0.01408		45.02	0.09574	45.17	0.04871
45.09	0.02463	45.44	0.02616		45.04	0.05319	45.19	0.04298
45.11	0.04433	45.46	0.0161		45.06	0.06383	45.21	0.06017
45.13	0	45.48	0.01811		45.08	0.07447	45.23	0.05444
45.15	0.06404	45.5	0.02012		45.1	0.05674	45.25	0.09456
45.17	0.01478	45.52	0.02012		45.12	0.0461	45.27	0.02579
45.19	0.04926	45.54	0.02817		45.14	0.05319	45.29	0.05444
45.21	0	45.56	0.02616		45.16	0.04965	45.31	0.06017
45.23	0.0197	45.58	0.01207		45.18	0.07447	45.33	0.03152
45.25	0.04926	45.6	0.00805		45.2	0.05674	45.35	0.08023
45.27	0.01478	45.62	0.0161		45.22	0.08511	45.37	0.04585
45.29	0.03941	45.64	0.02012		45.24	0.03901	45.39	0.0659
45.31	0.0197	45.66	0.01207		45.26	0.03901	45.41	0.07163
45.33	0	45.68	0.01408		45.28	0.07801	45.43	0.03725
45.35	0.01478	45.7	0.02616		45.3	0.05319	45.45	0.04298
45.37	0	45.72	0.01207		45.32	0.04965	45.47	0.05444
45.39	0.00493	45.74	0.01811		45.34	0.07092	45.49	0.04585
45.41	0.00493	45.76	0.0161		45.36	0.06738	45.51	0.04871
45.43	0	45.78	0.01811		45.38	0.0461	45.53	0.04585
45.45	0	45.8	0.01811		45.4	0.08156	45.55	0.04011
45.47	0.00985	45.82	0.01207		45.42	0.06383	45.57	0.03152
45.49	0.0197	45.84	0.02817		45.44	0.06028	45.59	0.05158
45.51	0.02463	45.86	0.01408		45.46	0.06383	45.61	0.03438
45.53	0	45.88	0.01006		45.48	0.07801	45.63	0.07736
45.55	0.00985	45.9	0.01207		45.5	0.03546	45.65	0.04298
45.57	0.06897	45.92	0.01811		45.52	0.02837	45.67	0.04011
45.59	0	45.94	0.0161		45.54	0.04255	45.69	0.04585
45.61	0	45.96	0.02213		45.56	0.03546	45.71	0.02579
45.63	0.00493	45.98	0.0161		45.58	0.0461	45.73	0.06017
45.65	0.00493	46	0.01006		45.6	0.04965	45.75	0.05158
45.67	0.0197	46.02	0.01006		45.62	0.08511	45.77	0.04011
45.69	0.01478	46.04	0.00604		45.64	0.06738	45.79	0.04011
45.71	0.02956	46.06	0.00604		45.66	0.05674	45.81	0.03725
45.73	0.02956	46.08	0.01408		45.68	0.0461	45.83	0.03152
45.75	0.03448	46.1	0.01408		45.7	0.03546	45.85	0.05731
45.77	0.00985	46.12	0.01408		45.72	0.04965	45.87	0.06877
45.79	0.00493	46.14	0.00805		45.74	0.07092	45.89	0.04011
45.81	0	46.16	0.02213		45.76	0.0461	45.91	0.04011
45.83	0.00985	46.18	0.01207		45.78	0.04255	45.93	0.07163
45.85	0.00493	46.2	0.0161		45.8	0.04255	45.95	0.03152
45.87	0	46.22	0.01408		45.82	0.07801	45.97	0.0659
45.89	0	46.24	0.0161		45.84	0.04255	45.99	0.04011
45.91	0.00985	46.26	0.00604		45.86	0.05319	46.01	0.04011
45.93	0.01478	46.28	0.01408		45.88	0.06738	46.03	0.04011
45.95	0.03448	46.3	0.0161		45.9	0.0461	46.05	0.06017
45.97	0.02463	46.32	0.01408		45.92	0.03191	46.07	0.04585
45.99	0.00493	46.34	0.01811		45.94	0.0461	46.09	0.06017
46.01	0.02463	46.36	0.00402		45.96	0.05319	46.11	0.04585
46.03	0.01478	46.38	0.01006		45.98	0.05674	46.13	0.05731
46.05	0.0197	46.4	0.01811		46	0.04255	46.15	0.03438
46.07	0	46.42	0.01207		46.02	0.0461	46.17	0.04585
46.09	0	46.44	0.01811		46.04	0.07447	46.19	0.04298
46.11	0.00985	46.46	0.01408		46.06	0.04255	46.21	0.02865
46.13	0	46.48	0.01408		46.08	0.03901	46.23	0.03725
46.15	0.00985	46.5	0.0161		46.1	0.06028	46.25	0.03152
46.17	0	46.52	0.01006		46.12	0.07092	46.27	0.05158
46.19	0	46.54	0.01207		46.14	0.03901	46.29	0.05731
46.21	0.02956	46.56	0.0161		46.16	0.04965	46.31	0.02865
46.23	0.04433	46.58	0.01408		46.18	0.03901	46.33	0.05444
46.25	0.00493	46.6	0.00805		46.2	0.05319	46.35	0.04298
46.27	0.03941	46.62	0.00805		46.22	0.04255	46.37	0.04585
46.29	0	46.64	0.01811		46.24	0.02837	46.39	0.03725
46.31	0	46.66	0.02012		46.26	0.05319	46.41	0.05731
46.33	0	46.68	0.01408		46.28	0.03901	46.43	0.05158
46.35	0	46.7	0.0161		46.3	0.05674	46.45	0.04298
46.37	0.02463	46.72	0.01408		46.32	0.06383	46.47	0.02865
46.39	0	46.74	0.00402		46.34	0.03901	46.49	0.03438
46.41	0	46.76	0.01408		46.36	0.03191	46.51	0.04011
46.43	0	46.78	0.0161		46.38	0.03191	46.53	0.05444
46.45	0.00985	46.8	0.0161		46.4	0.04965	46.55	0.05731
46.47	0.00493	46.82	0.01408		46.42	0.02482	46.57	0.03152
46.49	0.00493	46.84	0.02012		46.44	0.07092	46.59	0.04011
46.51	0.00985	46.86	0.00604		46.46	0.05319	46.61	0.06017
46.53	0	46.88	0.00805		46.48	0.02482	46.63	0.03438
46.55	0.00985	46.9	0.01811		46.5	0.03901	46.65	0.03438
46.57	0	46.92	0.01006		46.52	0.05319	46.67	0.02292
46.59	0	46.94	0.02414		46.54	0.0461	46.69	0.04011
46.61	0	46.96	0.0161		46.56	0.05674	46.71	0.04298
46.63	0.00985	46.98	0.01207		46.58	0.04965	46.73	0.05444
46.65	0	47	0.00805		46.6	0.0461	46.75	0.02865
46.67	0.04926	47.02	0.02213		46.62	0.05674	46.77	0.03152
46.69	0.00985	47.04	0.01408		46.64	0.05674	46.79	0.02865
46.71	0.03448	47.06	0.01006		46.66	0.03191	46.81	0.02579
46.73	0.05419	47.08	0.00805		46.68	0.02837	46.83	0.04871
46.75	0.0197	47.1	0.01006		46.7	0.06738	46.85	0.04585
46.77	0	47.12	0.01207		46.72	0.06383	46.87	0.06017
46.79	0	47.14	0.01811		46.74	0.0461	46.89	0.04011
46.81	0	47.16	0.01811		46.76	0.04255	46.91	0.03438
46.83	0	47.18	0.02012		46.78	0.06738	46.93	0.04585
46.85	0	47.2	0.02817		46.8	0.04255	46.95	0.03725
46.87	0	47.22	0.02012		46.82	0.0461	46.97	0.05731
46.89	0.00493	47.24	0.01006		46.84	0.04255	46.99	0.04871
46.91	0.02463	47.26	0.01006		46.86	0.03191	47.01	0.02865
46.93	0	47.28	0.01207		46.88	0.06738	47.03	0.04871
46.95	0	47.3	0.01207		46.9	0.0461	47.05	0.03438
46.97	0.02956	47.32	0.01408		46.92	0.07447	47.07	0.02292
46.99	0.05419	47.34	0.00604		46.94	0.06028	47.09	0.04298
47.01	0	47.36	0.0161		46.96	0.0461	47.11	0.04871
47.03	0	47.38	0.01207		46.98	0.04965	47.13	0.05158
47.05	0.01478	47.4	0.00805		47	0.02837	47.15	0.02865
47.07	0.0197	47.42	0.03421		47.02	0.04965	47.17	0.04871
47.09	0	47.44	0.00805		47.04	0.05674	47.19	0.02865
47.11	0	47.46	0.01811		47.06	0.0461	47.21	0.03152
47.13	0.00985	47.48	0.02012		47.08	0.06383	47.23	0.03152
47.15	0.03448	47.5	0.01006		47.1	0.04255	47.25	0.05731
47.17	0	47.52	0.00805		47.12	0.01773	47.27	0.03725
47.19	0	47.54	0.02012		47.14	0.0461	47.29	0.05731
47.21	0.01478	47.56	0.01006		47.16	0.03901	47.31	0.04011
47.23	0.05911	47.58	0.01207		47.18	0.03546	47.33	0.02579
47.25	0.0197	47.6	0.00805		47.2	0.04965	47.35	0.03438
47.27	0	47.62	0.02012		47.22	0.04255	47.37	0.0659
47.29	0.00493	47.64	0.0161		47.24	0.03546	47.39	0.04011
47.31	0.00985	47.66	0.01207		47.26	0.03901	47.41	0.03725
47.33	0.03448	47.68	0.02616		47.28	0.04255	47.43	0.04298
47.35	0	47.7	0.02414		47.3	0.06028	47.45	0.02865
47.37	0	47.72	0.00402		47.32	0.03191	47.47	0.03438
47.39	0.02463	47.74	0.00805		47.34	0.03901	47.49	0.04011
47.41	0.06404	47.76	0.02012		47.36	0.04965	47.51	0.05731
47.43	0.05911	47.78	0.00604		47.38	0.04965	47.53	0.04871
47.45	0.03941	47.8	0.01207		47.4	0.05319	47.55	0.03725
47.47	0.03941	47.82	0.01207		47.42	0.05319	47.57	0.05731
47.49	0.01478	47.84	0.01006		47.44	0.04965	47.59	0.05444
47.51	0.01478	47.86	0.01006		47.46	0.03901	47.61	0.03438
47.53	0.01478	47.88	0.02012		47.48	0.05674	47.63	0.05444
47.55	0.00985	47.9	0.00805		47.5	0.03191	47.65	0.05158
47.57	0.05419	47.92	0.00604		47.52	0.02837	47.67	0.04298
47.59	0.01478	47.94	0.01408		47.54	0.06028	47.69	0.04298
47.61	0	47.96	0.01811		47.56	0.04965	47.71	0.02292
47.63	0	47.98	0.00805		47.58	0.04965	47.73	0.04585
47.65	0.02463	48	0.01408		47.6	0.06028	47.75	0.03438
47.67	0.0197	48.02	0.00805		47.62	0.05674	47.77	0.03438
47.69	0	48.04	0.01408		47.64	0.03901	47.79	0.04585
47.71	0	48.06	0.01207		47.66	0.03191	47.81	0.03438
47.73	0.02463	48.08	0.01811		47.68	0.05319	47.83	0.05444
47.75	0.00985	48.1	0.02012		47.7	0.0922	47.85	0.06017
47.77	0.03448	48.12	0.01207		47.72	0.04255	47.87	0.06017
47.79	0	48.14	0.01207		47.74	0.07447	47.89	0.06017
47.81	0.0197	48.16	0.01006		47.76	0.06028	47.91	0.04298
47.83	0.04926	48.18	0.01006		47.78	0.04255	47.93	0.04298
47.85	0.02956	48.2	0.0161		47.8	0.05319	47.95	0.03725
47.87	0.02956	48.22	0.01408		47.82	0.03901	47.97	0.01719
47.89	0.0197	48.24	0.02012		47.84	0.03901	47.99	0.04011
47.91	0	48.26	0.0161		47.86	0.05674	48.01	0.03725
47.93	0.01478	48.28	0.0161		47.88	0.05674	48.03	0.03438
47.95	0	48.3	0.01006		47.9	0.06383	48.05	0.04011
47.97	0.05419	48.32	0.00604		47.92	0.03191	48.07	0.02292
47.99	0.00493	48.34	0.00604		47.94	0.04965	48.09	0.03438
48.01	0	48.36	0.01207		47.96	0.02837	48.11	0.03152
48.03	0	48.38	0.01811		47.98	0.04255	48.13	0.04298
48.05	0.00985	48.4	0.01006		48	0.05674	48.15	0.04871
48.07	0	48.42	0.01006		48.02	0.05674	48.17	0.04585
48.09	0.00493	48.44	0.01811		48.04	0.02482	48.19	0.04298
48.11	0.00493	48.46	0.01811		48.06	0.03546	48.21	0.02865
48.13	0	48.48	0.01408		48.08	0.02128	48.23	0.04011
48.15	0.04926	48.5	0.0161		48.1	0.05674	48.25	0.03438
48.17	0	48.52	0.01408		48.12	0.06028	48.27	0.03152
48.19	0.05419	48.54	0.01811		48.14	0.0461	48.29	0.02579
48.21	0.01478	48.56	0.01811		48.16	0.03546	48.31	0.02579
48.23	0	48.58	0.00402		48.18	0.0461	48.33	0.02865
48.25	0.05911	48.6	0.01207		48.2	0.01064	48.35	0.04585
48.27	0.00493	48.62	0.01811		48.22	0.06028	48.37	0.03438
48.29	0.02463	48.64	0.01006		48.24	0.02128	48.39	0.04585
48.31	0	48.66	0.02414		48.26	0.0461	48.41	0.04298
48.33	0	48.68	0.00805		48.28	0.04255	48.43	0.04585
48.35	0.01478	48.7	0.00805		48.3	0.04255	48.45	0.03725
48.37	0.03941	48.72	0.01006		48.32	0.05319	48.47	0.03152
48.39	0.00985	48.74	0.00805		48.34	0.04965	48.49	0.05158
48.41	0	48.76	0.01207		48.36	0.03901	48.51	0.03438
48.43	0.02463	48.78	0.01207		48.38	0.05319	48.53	0.02865
48.45	0.03941	48.8	0.01408		48.4	0.03546	48.55	0.03438
48.47	0	48.82	0.01207		48.42	0.02128	48.57	0.05444
48.49	0	48.84	0.01006		48.44	0.03546	48.59	0.05158
48.51	0.00985	48.86	0.02012		48.46	0.04965	48.61	0.03438
48.53	0.00493	48.88	0.01207		48.48	0.02128	48.63	0.02292
48.55	0	48.9	0.0161		48.5	0.03546	48.65	0.04585
48.57	0	48.92	0.01006		48.52	0.05319	48.67	0.03152
48.59	0	48.94	0.01408		48.54	0.02128	48.69	0.02579
48.61	0.02463	48.96	0.0161		48.56	0.04255	48.71	0.04298
48.63	0.02956	48.98	0.00805		48.58	0.03191	48.73	0.04871
48.65	0.01478	49	0.01207		48.6	0.0461	48.75	0.02865
48.67	0	49.02	0.0161		48.62	0.03901	48.77	0.05158
48.69	0.0197	49.04	0.01408		48.64	0.03191	48.79	0.05731
48.71	0.03941	49.06	0.01207		48.66	0.03901	48.81	0.02865
48.73	0.00493	49.08	0.00604		48.68	0.03901	48.83	0.04298
48.75	0	49.1	0.00805		48.7	0.03546	48.85	0.02579
48.77	0.01478	49.12	0.01811		48.72	0.03191	48.87	0.06304
48.79	0.00493	49.14	0.01006		48.74	0.02837	48.89	0.04585
48.81	0	49.16	0.01408		48.76	0.05319	48.91	0.05158
48.83	0	49.18	0.01207		48.78	0.0461	48.93	0.04011
48.85	0	49.2	0.01207		48.8	0.05319	48.95	0.03725
48.87	0.02956	49.22	0.01207		48.82	0.02837	48.97	0.03438
48.89	0.01478	49.24	0.0161		48.84	0.08156	48.99	0.04585
48.91	0.01478	49.26	0.01408		48.86	0.03901	49.01	0.04585
48.93	0.02956	49.28	0.00402		48.88	0.02482	49.03	0.03725
48.95	0	49.3	0.01811		48.9	0.03901	49.05	0.04298
48.97	0.00493	49.32	0.00805		48.92	0.01064	49.07	0.04011
48.99	0.03941	49.34	0.01408		48.94	0.05674	49.09	0.03438
49.01	0	49.36	0.01408		48.96	0.03901	49.11	0.03152
49.03	0.02463	49.38	0.00805		48.98	0.05674	49.13	0.05731
49.05	0	49.4	0.01408		49	0.03546	49.15	0.04871
49.07	0.01478	49.42	0.01207		49.02	0.0461	49.17	0.03725
49.09	0.00985	49.44	0.01006		49.04	0.05319	49.19	0.05731
49.11	0.01478	49.46	0.00805		49.06	0.04965	49.21	0.02579
49.13	0.0197	49.48	0.01207		49.08	0.04965	49.23	0.03152
49.15	0	49.5	0.01408		49.1	0.05674	49.25	0.03725
49.17	0	49.52	0.02012		49.12	0.04255	49.27	0.04298
49.19	0.00985	49.54	0.00402		49.14	0.03191	49.29	0.05731
49.21	0.02463	49.56	0.00604		49.16	0.03191	49.31	0.04585
49.23	0	49.58	0.0161		49.18	0.04255	49.33	0.02579
49.25	0.01478	49.6	0.00805		49.2	0.05319	49.35	0.04298
49.27	0	49.62	0.0161		49.22	0.02837	49.37	0.02865
49.29	0.00493	49.64	0.00604		49.24	0.03546	49.39	0.03725
49.31	0.01478	49.66	0.00805		49.26	0.03901	49.41	0.03438
49.33	0	49.68	0.01408		49.28	0.06028	49.43	0.04298
49.35	0.00985	49.7	0.00805		49.3	0.06028	49.45	0.04585
49.37	0.00985	49.72	0.01207		49.32	0.0461	49.47	0.02865
49.39	0	49.74	0.0161		49.34	0.03546	49.49	0.04011
49.41	0.02956	49.76	0.00604		49.36	0.02837	49.51	0.0659
49.43	0	49.78	0.01408		49.38	0.02837	49.53	0.04298
49.45	0.01478	49.8	0.02414		49.4	0.03901	49.55	0.05444
49.47	0	49.82	0.02012		49.42	0.03546	49.57	0.04585
49.49	0.02463	49.84	0.01207		49.44	0.03191	49.59	0.05731
49.51	0	49.86	0.02213		49.46	0.04255	49.61	0.04585
49.53	0.01478	49.88	0.0161		49.48	0.02128	49.63	0.03438
49.55	0	49.9	0.02012		49.5	0.05319	49.65	0.03438
49.57	0.03941	49.92	0.0161		49.52	0.04255	49.67	0.05158
49.59	0	49.94	0.01207		49.54	0.06738	49.69	0.02865
49.61	0.01478	49.96	0.00805		49.56	0.03546	49.71	0.04011
49.63	0.02463	49.98	0.00604		49.58	0.02482	49.73	0.02865
49.65	0.00985	50	0.01811		49.6	0.03546	49.75	0.04011
49.67	0.00493	50.02	0.01408		49.62	0.03191	49.77	0.04011
49.69	0.00985	50.04	0.01006		49.64	0.04965	49.79	0.02865
49.71	0	50.06	0.0161		49.66	0.06738	49.81	0.04298
49.73	0.04926	50.08	0.01408		49.68	0.05319	49.83	0.03725
49.75	0	50.1	0.00604		49.7	0.0461	49.85	0.03725
49.77	0	50.12	0.02213		49.72	0.03546	49.87	0.02292
49.79	0.00985	50.14	0.0161		49.74	0.05319	49.89	0.04871
49.81	0.00985	50.16	0.0161		49.76	0.02482	49.91	0.03438
49.83	0	50.18	0.02012		49.78	0.04965	49.93	0.04871
49.85	0	50.2	0.01811		49.8	0.04255	49.95	0.03438
49.87	0	50.22	0.01006		49.82	0.0461	49.97	0.06017
49.89	0	50.24	0.00604		49.84	0.03546	49.99	0.03152
49.91	0.04433	50.26	0.01207		49.86	0.0461	50.01	0.04011
49.93	0	50.28	0.01006		49.88	0.01064	50.03	0.06017
49.95	0	50.3	0.0161		49.9	0.03901	50.05	0.03152
49.97	0.0197	50.32	0.02012		49.92	0.0461	50.07	0.03725
49.99	0	50.34	0.01207		49.94	0.05674	50.09	0.04011
50.01	0	50.36	0.01207		49.96	0.03546	50.11	0.04585
50.03	0	50.38	0.01408		49.98	0.04965	50.13	0.04011
50.05	0	50.4	0.0161		50	0.04965	50.15	0.02865
50.07	0.02463	50.42	0.01408		50.02	0.0461	50.17	0.04298
50.09	0.0197	50.44	0.01408		50.04	0.06738	50.19	0.03152
50.11	0	50.46	0.01408		50.06	0.04255	50.21	0.01719
50.13	0.01478	50.48	0.01811		50.08	0.03546	50.23	0.05731
50.15	0.02463	50.5	0.01408		50.1	0.0461	50.25	0.02006
50.17	0	50.52	0.01006		50.12	0.03546	50.27	0.02865
50.19	0	50.54	0.01006		50.14	0.03901	50.29	0.04011
50.21	0	50.56	0.0161		50.16	0.04255	50.31	0.04011
50.23	0	50.58	0.01811		50.18	0.05674	50.33	0.02006
50.25	0.00985	50.6	0.00805		50.2	0.03901	50.35	0.03725
50.27	0	50.62	0.01006		50.22	0.03546	50.37	0.01719
50.29	0	50.64	0.00805		50.24	0.0461	50.39	0.04585
50.31	0	50.66	0.01207		50.26	0.04965	50.41	0.04871
50.33	0.03941	50.68	0.01207		50.28	0.04965	50.43	0.04871
50.35	0.03448	50.7	0.01408		50.3	0.04965	50.45	0.03725
50.37	0	50.72	0.01006		50.32	0.04255	50.47	0.04011
50.39	0	50.74	0.01207		50.34	0.07447	50.49	0.03438
50.41	0.00985	50.76	0.00805		50.36	0.06383	50.51	0.05444
50.43	0.00493	50.78	0.01811		50.38	0.03901	50.53	0.0659
50.45	0	50.8	0.00805		50.4	0.02128	50.55	0.05158
50.47	0.00493	50.82	0.02414		50.42	0.04255	50.57	0.04871
50.49	0	50.84	0.02213		50.44	0.04965	50.59	0.03725
50.51	0	50.86	0.0161		50.46	0.04965	50.61	0.03152
50.53	0.03448	50.88	0.0161		50.48	0.04255	50.63	0.04585
50.55	0	50.9	0.00805		50.5	0.0461	50.65	0.03725
50.57	0.00985	50.92	0.02616		50.52	0.02482	50.67	0.03438
50.59	0.00985	50.94	0.01408		50.54	0.03546	50.69	0.04871
50.61	0.00985	50.96	0.01207		50.56	0.06383	50.71	0.02579
50.63	0.03448	50.98	0.02213		50.58	0.05319	50.73	0.04585
50.65	0	51	0.01207		50.6	0.06383	50.75	0.03152
50.67	0	51.02	0.01811		50.62	0.06738	50.77	0.03152
50.69	0	51.04	0.02012		50.64	0.05674	50.79	0.02292
50.71	0	51.06	0.01207		50.66	0.05674	50.81	0.04585
50.73	0	51.08	0.00604		50.68	0.03901	50.83	0.04011
50.75	0.0197	51.1	0.01811		50.7	0.06028	50.85	0.03725
50.77	0	51.12	0.0161		50.72	0.03901	50.87	0.04298
50.79	0.02463	51.14	0.03622		50.74	0.03901	50.89	0.05731
50.81	0	51.16	0.01811		50.76	0.04965	50.91	0.05444
50.83	0.01478	51.18	0.01408		50.78	0.07447	50.93	0.05158
50.85	0	51.2	0.02616		50.8	0.04965	50.95	0.04011
50.87	0.00493	51.22	0.01811		50.82	0.04255	50.97	0.0659
50.89	0	51.24	0.01207		50.84	0.05674	50.99	0.03438
50.91	0.04433	51.26	0.02414		50.86	0.05674	51.01	0.0745
50.93	0	51.28	0.02012		50.88	0.05319	51.03	0.03438
50.95	0.01478	51.3	0.03219		50.9	0.04255	51.05	0.03152
50.97	0.02463	51.32	0.02213		50.92	0.05319	51.07	0.05158
50.99	0.02956	51.34	0.01408		50.94	0.05319	51.09	0.04298
51.01	0	51.36	0.03219		50.96	0.06028	51.11	0.05158
51.03	0.00985	51.38	0.03219		50.98	0.04965	51.13	0.03438
51.05	0.00985	51.4	0.03219		51	0.0461	51.15	0.04871
51.07	0.06404	51.42	0.02616		51.02	0.06738	51.17	0.04585
51.09	0.00493	51.44	0.01408		51.04	0.07092	51.19	0.03438
51.11	0.02463	51.46	0.03421		51.06	0.0461	51.21	0.06017
51.13	0.0197	51.48	0.04024		51.08	0.07447	51.23	0.04871
51.15	0.03941	51.5	0.03622		51.1	0.07801	51.25	0.05731
51.17	0	51.52	0.04225		51.12	0.07447	51.27	0.05444
51.19	0.00493	51.54	0.03823		51.14	0.05319	51.29	0.04585
51.21	0	51.56	0.02414		51.16	0.06028	51.31	0.06877
51.23	0.04926	51.58	0.04628		51.18	0.04965	51.33	0.06017
51.25	0.02956	51.6	0.04225		51.2	0.0922	51.35	0.05444
51.27	0.02956	51.62	0.05231		51.22	0.05319	51.37	0.04298
51.29	0.00493	51.64	0.06237		51.24	0.08511	51.39	0.04585
51.31	0.00985	51.66	0.0503		51.26	0.04965	51.41	0.06877
51.33	0.05419	51.68	0.06237		51.28	0.08156	51.43	0.05158
51.35	0.03941	51.7	0.06439		51.3	0.05674	51.45	0.06304
51.37	0.00493	51.72	0.10463		51.32	0.07447	51.47	0.06017
51.39	0.03941	51.74	0.09859		51.34	0.07801	51.49	0.05731
51.41	0.02463	51.76	0.15091		51.36	0.0922	51.51	0.08309
51.43	0.08867	51.78	0.13682		51.38	0.11702	51.53	0.04585
51.45	0.07882	51.8	0.19316		51.4	0.07447	51.55	0.06877
51.47	0.05419	51.82	0.22535		51.42	0.08865	51.57	0.04585
51.49	0.02956	51.84	0.1831		51.44	0.13121	51.59	0.08023
51.51	0.05911	51.86	0.27565		51.46	0.09929	51.61	0.06017
51.53	0.1133	51.88	0.2998		51.48	0.17021	51.63	0.09169
51.55	0.15764	51.9	0.30986		51.5	0.1383	51.65	0.06877
51.57	0.05911	51.92	0.34406		51.52	0.13121	51.67	0.08023
51.59	0.10345	51.94	0.36821		51.54	0.19149	51.69	0.10888
51.61	0.11823	51.96	0.34406		51.56	0.19858	51.71	0.1404
51.63	0.16749	51.98	0.36217		51.58	0.21277	51.73	0.12607
51.65	0.15764	52	0.27968		51.6	0.28723	51.75	0.16332
51.67	0.16256	52.02	0.29577		51.62	0.25532	51.77	0.14327
51.69	0.17734	52.04	0.25553		51.64	0.32979	51.79	0.17479
51.71	0.21675	52.06	0.23742		51.66	0.35461	51.81	0.2063
51.73	0.29064	52.08	0.24346		51.68	0.29433	51.83	0.24355
51.75	0.31034	52.1	0.2173		51.7	0.35816	51.85	0.29226
51.77	0.27094	52.12	0.17103		51.72	0.38652	51.87	0.31805
51.79	0.33498	52.14	0.15292		51.74	0.42199	51.89	0.36103
51.81	0.3399	52.16	0.11469		51.76	0.42908	51.91	0.3467
51.83	0.44335	52.18	0.10664		51.78	0.37234	51.93	0.38682
51.85	0.3399	52.2	0.07847		51.8	0.36525	51.95	0.39542
51.87	0.37438	52.22	0.06237		51.82	0.33333	51.97	0.41547
51.89	0.29557	52.24	0.05634		51.84	0.35461	51.99	0.36103
51.91	0.36453	52.26	0.05634		51.86	0.26241	52.01	0.36676
51.93	0.26601	52.28	0.06237		51.88	0.26241	52.03	0.30086
51.95	0.30542	52.3	0.04628		51.9	0.24468	52.05	0.24928
51.97	0.133	52.32	0.04427		51.92	0.21986	52.07	0.24928
51.99	0.133	52.34	0.03421		51.94	0.20213	52.09	0.22923
52.01	0.08374	52.36	0.03823		51.96	0.24823	52.11	0.20057
52.03	0.17241	52.38	0.02616		51.98	0.20922	52.13	0.20917
52.05	0.0936	52.4	0.02012		52	0.17021	52.15	0.16905
52.07	0.07389	52.42	0.02213		52.02	0.15957	52.17	0.15186
52.09	0.08867	52.44	0.02414		52.04	0.10993	52.19	0.10602
52.11	0.14286	52.46	0.02414		52.06	0.12766	52.21	0.09169
52.13	0.10345	52.48	0.03018		52.08	0.07447	52.23	0.08023
52.15	0.14778	52.5	0.01006		52.1	0.15957	52.25	0.10029
52.17	0	52.52	0.02012		52.12	0.07447	52.27	0.0659
52.19	0.12315	52.54	0.03823		52.14	0.06383	52.29	0.08309
52.21	0.06404	52.56	0.02012		52.16	0.06383	52.31	0.0659
52.23	0.02956	52.58	0.02414		52.18	0.07447	52.33	0.04585
52.25	0.03941	52.6	0.02414		52.2	0.08865	52.35	0.04585
52.27	0.03448	52.62	0.01006		52.22	0.06028	52.37	0.05731
52.29	0.02956	52.64	0.02817		52.24	0.06738	52.39	0.04011
52.31	0.02463	52.66	0.03018		52.26	0.07801	52.41	0.05731
52.33	0.00985	52.68	0.03219		52.28	0.03546	52.43	0.04871
52.35	0.01478	52.7	0.03421		52.3	0.05674	52.45	0.05158
52.37	0	52.72	0.02213		52.32	0.04965	52.47	0.0659
52.39	0.01478	52.74	0.01207		52.34	0.05319	52.49	0.02292
52.41	0.06404	52.76	0.0161		52.36	0.05674	52.51	0.05158
52.43	0.0197	52.78	0.01207		52.38	0.0461	52.53	0.03152
52.45	0.04926	52.8	0.01811		52.4	0.06738	52.55	0.04011
52.47	0.0197	52.82	0.02616		52.42	0.05319	52.57	0.05444
52.49	0.05419	52.84	0.01207		52.44	0.05674	52.59	0.04298
52.51	0	52.86	0.0161		52.46	0.03191	52.61	0.03438
52.53	0.02463	52.88	0.01811		52.48	0.03546	52.63	0.04011
52.55	0.0197	52.9	0.01408		52.5	0.05319	52.65	0.05444
52.57	0.00493	52.92	0.00805		52.52	0.03546	52.67	0.04298
52.59	0	52.94	0.02616		52.54	0.06738	52.69	0.08023
52.61	0	52.96	0.01006		52.56	0.0461	52.71	0.04011
52.63	0	52.98	0.00805		52.58	0.03546	52.73	0.04298
52.65	0.01478	53	0.01408		52.6	0.0461	52.75	0.02579
52.67	0.02463	53.02	0.01811		52.62	0.04965	52.77	0.05731
52.69	0	53.04	0.02414		52.64	0.05674	52.79	0.02006
52.71	0.00493	53.06	0.01006		52.66	0.06028	52.81	0.05158
52.73	0	53.08	0.01408		52.68	0.06738	52.83	0.04011
52.75	0	53.1	0.01408		52.7	0.04965	52.85	0.02865
52.77	0	53.12	0.0161		52.72	0.08511	52.87	0.03438
52.79	0.00493	53.14	0.01408		52.74	0.0461	52.89	0.02579
52.81	0.0197	53.16	0.02817		52.76	0.04255	52.91	0.02579
52.83	0.03448	53.18	0.01006		52.78	0.05319	52.93	0.04011
52.85	0.03941	53.2	0.00805		52.8	0.03191	52.95	0.02865
52.87	0.03448	53.22	0.01811		52.82	0.04255	52.97	0.05444
52.89	0.04433	53.24	0.02012		52.84	0.03191	52.99	0.04011
52.91	0.03448	53.26	0.01006		52.86	0.06028	53.01	0.03725
52.93	0	53.28	0.00805		52.88	0.03546	53.03	0.02579
52.95	0.00985	53.3	0.0161		52.9	0.03191	53.05	0.05444
52.97	0.01478	53.32	0.01006		52.92	0.03546	53.07	0.03438
52.99	0.0197	53.34	0.01207		52.94	0.04255	53.09	0.04298
53.01	0	53.36	0.01207		52.96	0.03191	53.11	0.04871
53.03	0	53.38	0.00604		52.98	0.03901	53.13	0.03725
53.05	0.00493	53.4	0.01811		53	0.04255	53.15	0.05731
53.07	0.02463	53.42	0.01408		53.02	0.03546	53.17	0.04871
53.09	0.03448	53.44	0.01811		53.04	0.06028	53.19	0.04298
53.11	0.01478	53.46	0.01207		53.06	0.08156	53.21	0.04585
53.13	0.01478	53.48	0.01408		53.08	0.05319	53.23	0.02579
53.15	0.04926	53.5	0.01408		53.1	0.02837	53.25	0.03438
53.17	0	53.52	0.00805		53.12	0.04255	53.27	0.04871
53.19	0.02956	53.54	0.00604		53.14	0.01773	53.29	0.02865
53.21	0.03941	53.56	0.02012		53.16	0.05674	53.31	0.03152
53.23	0.03448	53.58	0.01408		53.18	0.02482	53.33	0.02865
53.25	0.01478	53.6	0.01811		53.2	0.03546	53.35	0.06017
53.27	0.00493	53.62	0.01408		53.22	0.04965	53.37	0.02579
53.29	0	53.64	0.01408		53.24	0.05674	53.39	0.05158
53.31	0.00985	53.66	0.0161		53.26	0.05674	53.41	0.04011
53.33	0.01478	53.68	0.01006		53.28	0.05319	53.43	0.04011
53.35	0.03448	53.7	0.0161		53.3	0.02837	53.45	0.05731
53.37	0.01478	53.72	0.00201		53.32	0.05319	53.47	0.02292
53.39	0.03448	53.74	0.0161		53.34	0.03901	53.49	0.06017
53.41	0	53.76	0.00805		53.36	0.05319	53.51	0.02579
53.43	0.00985	53.78	0.01408		53.38	0.03191	53.53	0.02579
53.45	0.00493	53.8	0.01207		53.4	0.05674	53.55	0.03725
53.47	0.00493	53.82	0.01408		53.42	0.05674	53.57	0.04298
53.49	0	53.84	0.02213		53.44	0.04255	53.59	0.04871
53.51	0	53.86	0.00402		53.46	0.05674	53.61	0.05158
53.53	0.0197	53.88	0.02213		53.48	0.03901	53.63	0.03725
53.55	0.05419	53.9	0.0161		53.5	0.02482	53.65	0.02865
53.57	0.01478	53.92	0.00805		53.52	0.02837	53.67	0.05731
53.59	0.00493	53.94	0.01006		53.54	0.04255	53.69	0.05444
53.61	0.00493	53.96	0.01207		53.56	0.06383	53.71	0.04585
53.63	0	53.98	0.01408		53.58	0.07447	53.73	0.02579
53.65	0.00985	54	0.01811		53.6	0.03546	53.75	0.03438
53.67	0	54.02	0.00604		53.62	0.02128	53.77	0.03152
53.69	0.00985	54.04	0.02213		53.64	0.04255	53.79	0.04011
53.71	0.00493	54.06	0.0161		53.66	0.04255	53.81	0.04011
53.73	0.03448	54.08	0.00805		53.68	0.04255	53.83	0.02865
53.75	0.01478	54.1	0.01811		53.7	0.06738	53.85	0.03438
53.77	0	54.12	0.00604		53.72	0.02482	53.87	0.01719
53.79	0.0197	54.14	0.01408		53.74	0.0461	53.89	0.02579
53.81	0.04926	54.16	0.01006		53.76	0.02482	53.91	0.01719
53.83	0	54.18	0.00805		53.78	0.0461	53.93	0.03438
53.85	0.02463	54.2	0.00805		53.8	0.0461	53.95	0.02865
53.87	0.00985	54.22	0.01408		53.82	0.04965	53.97	0.03438
53.89	0.00985	54.24	0.02012		53.84	0.05674	53.99	0.02579
53.91	0.01478	54.26	0.02012		53.86	0.02482	54.01	0.01433
53.93	0	54.28	0.01006		53.88	0.02837	54.03	0.04585
53.95	0.04926	54.3	0.0161		53.9	0.05674	54.05	0.03725
53.97	0	54.32	0.01207		53.92	0.03546	54.07	0.03725
53.99	0.01478	54.34	0.0161		53.94	0.04965	54.09	0.04011
54.01	0.02956	54.36	0.01408		53.96	0.05674	54.11	0.05444
54.03	0.02956	54.38	0.00604		53.98	0.04255	54.13	0.02579
54.05	0.00985	54.4	0.01811		54	0.02837	54.15	0.04871
54.07	0.0197	54.42	0.01207		54.02	0.04965	54.17	0.05158
54.09	0.00493	54.44	0.0161		54.04	0.0461	54.19	0.02006
54.11	0.03941	54.46	0.00805		54.06	0.04255	54.21	0.04871
54.13	0	54.48	0.01408		54.08	0.04965	54.23	0.03725
54.15	0.02956	54.5	0.01006		54.1	0.03546	54.25	0.02865
54.17	0.00985	54.52	0.00805		54.12	0.0461	54.27	0.03438
54.19	0.04433	54.54	0.00805		54.14	0.05319	54.29	0.02865
54.21	0.03448	54.56	0.01207		54.16	0.04255	54.31	0.04011
54.23	0.0197	54.58	0.01408		54.18	0.03546	54.33	0.03152
54.25	0.00493	54.6	0.01006		54.2	0.04255	54.35	0.03152
54.27	0.00493	54.62	0.01811		54.22	0.04255	54.37	0.03725
54.29	0.02956	54.64	0.01408		54.24	0.02837	54.39	0.04585
54.31	0.01478	54.66	0.01006		54.26	0.04965	54.41	0.04298
54.33	0	54.68	0.01811		54.28	0.06383	54.43	0.04298
54.35	0	54.7	0.00805		54.3	0.03191	54.45	0.03438
54.37	0.00985	54.72	0.01006		54.32	0.05319	54.47	0.03152
54.39	0.00985	54.74	0.00604		54.34	0.03901	54.49	0.02865
54.41	0.00985	54.76	0.01006		54.36	0.02128	54.51	0.03438
54.43	0.02463	54.78	0.01811		54.38	0.04255	54.53	0.04011
54.45	0.00985	54.8	0.01408		54.4	0.05319	54.55	0.02292
54.47	0	54.82	0.01006		54.42	0.03546	54.57	0.05731
54.49	0.0197	54.84	0.01408		54.44	0.02837	54.59	0.02865
54.51	0	54.86	0.00402		54.46	0.05319	54.61	0.05444
54.53	0.00985	54.88	0.00604		54.48	0.02482	54.63	0.03438
54.55	0	54.9	0.00402		54.5	0.04965	54.65	0.04871
54.57	0	54.92	0.0161		54.52	0.02837	54.67	0.05731
54.59	0.02956	54.94	0.00805		54.54	0.03546	54.69	0.03152
54.61	0.03448	54.96	0.00402		54.56	0.04255	54.71	0.02865
54.63	0.0197	54.98	0.02012		54.58	0.04255	54.73	0.04585
54.65	0.00493	55	0.01006		54.6	0.03546	54.75	0.03438
54.67	0.02463	55.02	0.01811		54.62	0.04965	54.77	0.02579
54.69	0.00985	55.04	0.0161		54.64	0.03901	54.79	0.02579
54.71	0.00493	55.06	0.0161		54.66	0.04965	54.81	0.04871
54.73	0.00985	55.08	0.0161		54.68	0.08511	54.83	0.04011
54.75	0	55.1	0.00805		54.7	0.03901	54.85	0.05731
54.77	0.01478	55.12	0.0161		54.72	0.03191	54.87	0.02579
54.79	0.01478	55.14	0.0161		54.74	0.0461	54.89	0.01719
54.81	0.01478	55.16	0.01408		54.76	0.03191	54.91	0.04011
54.83	0	55.18	0.0161		54.78	0.04255	54.93	0.04871
54.85	0.04926	55.2	0.01408		54.8	0.03546	54.95	0.05158
54.87	0.00493	55.22	0.01811		54.82	0.03191	54.97	0.04871
54.89	0.01478	55.24	0.01811		54.84	0.03191	54.99	0.02865
54.91	0.0197	55.26	0.00402		54.86	0.03901	55.01	0.03725
54.93	0.01478	55.28	0.0161		54.88	0.07092	55.03	0.03725
54.95	0.01478	55.3	0.01408		54.9	0.0461	55.05	0.03725
54.97	0	55.32	0.0161		54.92	0.06028	55.07	0.02865
54.99	0.0197	55.34	0.01811		54.94	0.05674	55.09	0.02579
55.01	0	55.36	0.00604		54.96	0.05319	55.11	0.05158
55.03	0.00493	55.38	0.01207		54.98	0.03901	55.13	0.02865
55.05	0.01478	55.4	0.00805		55	0.0461	55.15	0.06017
55.07	0.02463	55.42	0.01006		55.02	0.0461	55.17	0.03438
55.09	0.02956	55.44	0.01006		55.04	0.04255	55.19	0.02865
55.11	0.02463	55.46	0.00805		55.06	0.03191	55.21	0.04298
55.13	0.00493	55.48	0.00402		55.08	0.02837	55.23	0.05444
55.15	0.00493	55.5	0.0161		55.1	0.03191	55.25	0.02579
55.17	0.02463	55.52	0.00805		55.12	0.02837	55.27	0.05158
55.19	0.01478	55.54	0.01207		55.14	0.04965	55.29	0.03438
55.21	0.00985	55.56	0.01408		55.16	0.03546	55.31	0.03725
55.23	0	55.58	0.00201		55.18	0.03901	55.33	0.04011
55.25	0.00985	55.6	0.00805		55.2	0.04965	55.35	0.04871
55.27	0.00493	55.62	0.01408		55.22	0.02128	55.37	0.02292
55.29	0.04433	55.64	0.0161		55.24	0.03546	55.39	0.05158
55.31	0.02463	55.66	0		55.26	0.03901	55.41	0.04871
55.33	0.02463	55.68	0.00805		55.28	0.02482	55.43	0.05444
55.35	0.0197	55.7	0.02012		55.3	0.06028	55.45	0.04011
55.37	0.02463	55.72	0.01408		55.32	0.05319	55.47	0.02865
55.39	0.02956	55.74	0.01006		55.34	0.03191	55.49	0.04011
55.41	0.00985	55.76	0.01207		55.36	0.02837	55.51	0.04011
55.43	0	55.78	0.00805		55.38	0.03901	55.53	0.03725
55.45	0	55.8	0.01006		55.4	0.04255	55.55	0.02579
55.47	0.00985	55.82	0.01006		55.42	0.03191	55.57	0.03725
55.49	0.04433	55.84	0.02213		55.44	0.04255	55.59	0.03438
55.51	0.00985	55.86	0.02012		55.46	0.04965	55.61	0.03725
55.53	0.00985	55.88	0.00402		55.48	0.03191	55.63	0.04298
55.55	0	55.9	0.01207		55.5	0.02837	55.65	0.05444
55.57	0	55.92	0.0161		55.52	0.02128	55.67	0.04585
55.59	0.0197	55.94	0.01207		55.54	0.02128	55.69	0.02006
55.61	0.03448	55.96	0.01408		55.56	0.03191	55.71	0.04298
55.63	0.04433	55.98	0.01207		55.58	0.03546	55.73	0.04298
55.65	0.03941	56	0.01207		55.6	0.02128	55.75	0.03725
55.67	0.02463	56.02	0.01207		55.62	0.0461	55.77	0.01719
55.69	0.05911	56.04	0.01207		55.64	0.03546	55.79	0.03152
55.71	0.00985	56.06	0.01408		55.66	0.06383	55.81	0.04871
55.73	0.03448	56.08	0.01207		55.68	0.03191	55.83	0.04011
55.75	0.02956	56.1	0.01207		55.7	0.05674	55.85	0.03152
55.77	0.00985	56.12	0.01006		55.72	0.02482	55.87	0.03438
55.79	0	56.14	0.01408		55.74	0.03546	55.89	0.02006
55.81	0.00985	56.16	0.01207		55.76	0.0461	55.91	0.05158
55.83	0.00493	56.18	0.00402		55.78	0.03191	55.93	0.03152
55.85	0.03448	56.2	0.00402		55.8	0.04255	55.95	0.04871
55.87	0.01478	56.22	0.01811		55.82	0.05319	55.97	0.01433
55.89	0.00493	56.24	0.01408		55.84	0.05319	55.99	0.04298
55.91	0	56.26	0.0161		55.86	0.03901	56.01	0.04298
55.93	0.04433	56.28	0.00604		55.88	0.04965	56.03	0.04871
55.95	0.02463	56.3	0.00604		55.9	0.01773	56.05	0.02579
55.97	0.03448	56.32	0.01408		55.92	0.03191	56.07	0.03725
55.99	0.00985	56.34	0.00604		55.94	0.05319	56.09	0.03438
56.01	0.01478	56.36	0.02213		55.96	0.03546	56.11	0.03152
56.03	0.0197	56.38	0.01006		55.98	0.03901	56.13	0.04011
56.05	0.01478	56.4	0.01408		56	0.04255	56.15	0.04298
56.07	0.00985	56.42	0.00805		56.02	0.04965	56.17	0.02292
56.09	0.02463	56.44	0.00805		56.04	0.06028	56.19	0.02865
56.11	0.00493	56.46	0.02012		56.06	0.04965	56.21	0.04011
56.13	0.00493	56.48	0.01006		56.08	0.03901	56.23	0.02292
56.15	0.00985	56.5	0.01408		56.1	0.03546	56.25	0.04011
56.17	0.03941	56.52	0.01207		56.12	0.04965	56.27	0.04298
56.19	0.02463	56.54	0.00805		56.14	0.02482	56.29	0.03725
56.21	0.01478	56.56	0.00604		56.16	0.0461	56.31	0.05444
56.23	0.02463	56.58	0.02213		56.18	0.03546	56.33	0.04298
56.25	0.02956	56.6	0.01207		56.2	0.0461	56.35	0.03725
56.27	0.03448	56.62	0.00805		56.22	0.06383	56.37	0.04011
56.29	0.00493	56.64	0.01811		56.24	0.03191	56.39	0.03152
56.31	0.00985	56.66	0.01408		56.26	0.04255	56.41	0.04298
56.33	0	56.68	0.01207		56.28	0.06383	56.43	0.04871
56.35	0	56.7	0.01006		56.3	0.03546	56.45	0.02579
56.37	0.0197	56.72	0.01207		56.32	0.03901	56.47	0.04011
56.39	0.02463	56.74	0.00402		56.34	0.05319	56.49	0.03438
56.41	0.01478	56.76	0.00805		56.36	0.05319	56.51	0.03152
56.43	0.01478	56.78	0.01408		56.38	0.06738	56.53	0.04585
56.45	0.03941	56.8	0.00805		56.4	0.05319	56.55	0.02865
56.47	0.00985	56.82	0.01207		56.42	0.04255	56.57	0.02865
56.49	0	56.84	0.00604		56.44	0.03901	56.59	0.04585
56.51	0.01478	56.86	0.00604		56.46	0.03191	56.61	0.03725
56.53	0.00985	56.88	0.01006		56.48	0.03901	56.63	0.04298
56.55	0.0197	56.9	0.02012		56.5	0.03546	56.65	0.02865
56.57	0.01478	56.92	0.01207		56.52	0.03901	56.67	0.04011
56.59	0.0197	56.94	0.01207		56.54	0.04255	56.69	0.02579
56.61	0	56.96	0.00805		56.56	0.04255	56.71	0.03725
56.63	0.03448	56.98	0.01207		56.58	0.06383	56.73	0.04011
56.65	0.0197	57	0.01006		56.6	0.03546	56.75	0.04871
56.67	0.03941	57.02	0.01006		56.62	0.04255	56.77	0.04298
56.69	0.02463	57.04	0.01408		56.64	0.03191	56.79	0.04011
56.71	0	57.06	0.01811		56.66	0.03546	56.81	0.02579
56.73	0.01478	57.08	0.0161		56.68	0.03191	56.83	0.03725
56.75	0	57.1	0.01207		56.7	0.02482	56.85	0.02292
56.77	0.00493	57.12	0.01408		56.72	0.04965	56.87	0.04585
56.79	0.00985	57.14	0.01408		56.74	0.03191	56.89	0.03725
56.81	0.01478	57.16	0.02414		56.76	0.04255	56.91	0.02579
56.83	0	57.18	0.00805		56.78	0.01773	56.93	0.03725
56.85	0.03448	57.2	0.00604		56.8	0.03191	56.95	0.04298
56.87	0.02463	57.22	0.01006		56.82	0.01773	56.97	0.03438
56.89	0	57.24	0.02817		56.84	0.02128	56.99	0.03438
56.91	0.01478	57.26	0.01207		56.86	0.05319	57.01	0.02006
56.93	0.00985	57.28	0.01408		56.88	0.05319	57.03	0.03152
56.95	0.03941	57.3	0.01006		56.9	0.05674	57.05	0.04871
56.97	0.05911	57.32	0.01006		56.92	0.02837	57.07	0.04871
56.99	0.02463	57.34	0.01408		56.94	0.03901	57.09	0.03725
57.01	0.0197	57.36	0.00402		56.96	0.0461	57.11	0.03438
57.03	0.02956	57.38	0.01811		56.98	0.04255	57.13	0.04871
57.05	0.03941	57.4	0.02012		57	0.04965	57.15	0.03438
57.07	0.01478	57.42	0.01006		57.02	0.02837	57.17	0.02579
57.09	0.02463	57.44	0.00402		57.04	0.03191	57.19	0.04871
57.11	0	57.46	0.01207		57.06	0.0461	57.21	0.04871
57.13	0.02463	57.48	0.00805		57.08	0.03901	57.23	0.03438
57.15	0.03448	57.5	0.00805		57.1	0.02837	57.25	0.03438
57.17	0.04433	57.52	0.00805		57.12	0.01773	57.27	0.05444
57.19	0.00985	57.54	0.01207		57.14	0.03546	57.29	0.03725
57.21	0.01478	57.56	0.00805		57.16	0.02128	57.31	0.04011
57.23	0.02463	57.58	0.01006		57.18	0.04255	57.33	0.0659
57.25	0.02956	57.6	0.00805		57.2	0.03901	57.35	0.04585
57.27	0.0197	57.62	0.00402		57.22	0.05319	57.37	0.02579
57.29	0	57.64	0.0161		57.24	0.02482	57.39	0.04011
57.31	0.00493	57.66	0.00604		57.26	0.03546	57.41	0.03438
57.33	0.02463	57.68	0.02012		57.28	0.05319	57.43	0.02292
57.35	0.00493	57.7	0.01408		57.3	0.0461	57.45	0.04298
57.37	0.00985	57.72	0.01006		57.32	0.05319	57.47	0.04585
57.39	0.02956	57.74	0.01207		57.34	0.02482	57.49	0.03152
57.41	0	57.76	0.01006		57.36	0.06383	57.51	0.02292
57.43	0.00493	57.78	0.01811		57.38	0.03191	57.53	0.05158
57.45	0.0197	57.8	0.0161		57.4	0.03901	57.55	0.03725
57.47	0.0197	57.82	0.01811		57.42	0.06383	57.57	0.04011
57.49	0	57.84	0.01006		57.44	0.06028	57.59	0.04011
57.51	0.00985	57.86	0.01006		57.46	0.04255	57.61	0.02292
57.53	0.00985	57.88	0.01006		57.48	0.06383	57.63	0.04871
57.55	0.0197	57.9	0.0161		57.5	0.03901	57.65	0.04011
57.57	0.03448	57.92	0.0161		57.52	0.03191	57.67	0.02865
57.59	0.02463	57.94	0.00805		57.54	0.03546	57.69	0.04298
57.61	0	57.96	0.01207		57.56	0.05674	57.71	0.03438
57.63	0.02956	57.98	0.00805		57.58	0.04255	57.73	0.02579
57.65	0.02463	58	0.01006		57.6	0.03901	57.75	0.02579
57.67	0.00493	58.02	0.00805		57.62	0.03901	57.77	0.02292
57.69	0.02956	58.04	0.00805		57.64	0.03191	57.79	0.02865
57.71	0.0197	58.06	0.0161		57.66	0.04255	57.81	0.05444
57.73	0.00985	58.08	0.00201		57.68	0.0461	57.83	0.03438
57.75	0.04926	58.1	0.00604		57.7	0.03901	57.85	0.03152
57.77	0.02463	58.12	0.01207		57.72	0.06383	57.87	0.02579
57.79	0	58.14	0.00805		57.74	0.04965	57.89	0.02292
57.81	0.01478	58.16	0.0161		57.76	0.0461	57.91	0.04871
57.83	0.01478	58.18	0.00604		57.78	0.04255	57.93	0.02006
57.85	0.0197	58.2	0.01006		57.8	0.02837	57.95	0.04298
57.87	0.01478	58.22	0.0161		57.82	0.03546	57.97	0.05158
57.89	0.04433	58.24	0.0161		57.84	0.02128	57.99	0.02292
57.91	0.01478	58.26	0.01207		57.86	0.03546	58.01	0.03152
57.93	0.0197	58.28	0.01006		57.88	0.04255	58.03	0.03152
57.95	0.03448	58.3	0.01006		57.9	0.04965	58.05	0.04011
57.97	0.01478	58.32	0.01006		57.92	0.02482	58.07	0.06877
57.99	0.0197	58.34	0.00604		57.94	0.0461	58.09	0.02579
58.01	0	58.36	0.0161		57.96	0.04255	58.11	0.05444
58.03	0.0197	58.38	0.0161		57.98	0.05319	58.13	0.02579
58.05	0.00985	58.4	0.00805		58	0.02482	58.15	0.04585
58.07	0.00493	58.42	0.00201		58.02	0.06028	58.17	0.02865
58.09	0.00493	58.44	0.02012		58.04	0.03901	58.19	0.03438
58.11	0.0197	58.46	0.01811		58.06	0.04255	58.21	0.04871
58.13	0	58.48	0.01006		58.08	0.0461	58.23	0.02006
58.15	0.03448	58.5	0.01006		58.1	0.03901	58.25	0.03438
58.17	0.01478	58.52	0.02616		58.12	0.06028	58.27	0.02292
58.19	0.00493	58.54	0.00402		58.14	0.04965	58.29	0.04011
58.21	0.01478	58.56	0.00604		58.16	0.03546	58.31	0.03725
58.23	0.04433	58.58	0.0161		58.18	0.04965	58.33	0.03438
58.25	0.04926	58.6	0.00805		58.2	0.04965	58.35	0.04871
58.27	0.02463	58.62	0.02213		58.22	0.03191	58.37	0.04871
58.29	0.03941	58.64	0.01207		58.24	0.02837	58.39	0.03152
58.31	0.0197	58.66	0.01408		58.26	0.0461	58.41	0.04585
58.33	0.02956	58.68	0.0161		58.28	0.03191	58.43	0.03725
58.35	0	58.7	0.0161		58.3	0.03191	58.45	0.05444
58.37	0	58.72	0.01006		58.32	0.02128	58.47	0.03438
58.39	0	58.74	0.00402		58.34	0.05319	58.49	0.02292
58.41	0.0197	58.76	0.01207		58.36	0.03191	58.51	0.05444
58.43	0	58.78	0.0161		58.38	0.05319	58.53	0.02865
58.45	0.00985	58.8	0.01207		58.4	0.02482	58.55	0.03438
58.47	0	58.82	0.01207		58.42	0.04255	58.57	0.02865
58.49	0.02956	58.84	0.0161		58.44	0.02482	58.59	0.02865
58.51	0.03448	58.86	0.01207		58.46	0.04255	58.61	0.04585
58.53	0.0197	58.88	0.01207		58.48	0.05674	58.63	0.03152
58.55	0.0197	58.9	0.01006		58.5	0.03901	58.65	0.04871
58.57	0.0197	58.92	0.00805		58.52	0.03901	58.67	0.03438
58.59	0.00493	58.94	0.00805		58.54	0.03901	58.69	0.04011
58.61	0.03448	58.96	0.00402		58.56	0.0461	58.71	0.04871
58.63	0.0197	58.98	0.01811		58.58	0.03546	58.73	0.03725
58.65	0.00493	59	0.01408		58.6	0.02837	58.75	0.01719
58.67	0.0197	59.02	0.01207		58.62	0.03901	58.77	0.05444
58.69	0.03448	59.04	0.00604		58.64	0.03191	58.79	0.04011
58.71	0.02463	59.06	0.00402		58.66	0.02128	58.81	0.04298
58.73	0.04926	59.08	0.00805		58.68	0.03546	58.83	0.03438
58.75	0.00493	59.1	0.01408		58.7	0.0461	58.85	0.03152
58.77	0.02463	59.12	0.01006		58.72	0.03546	58.87	0.03725
58.79	0.07389	59.14	0.00805		58.74	0.03901	58.89	0.04298
58.81	0.03448	59.16	0.01006		58.76	0.03546	58.91	0.04298
58.83	0.01478	59.18	0.01207		58.78	0.02128	58.93	0.04298
58.85	0	59.2	0.00201		58.8	0.03546	58.95	0.04585
58.87	0.00985	59.22	0.01207		58.82	0.03901	58.97	0.03725
58.89	0.02463	59.24	0.00805		58.84	0.03901	58.99	0.02579
58.91	0.03448	59.26	0.01006		58.86	0.04255	59.01	0.03725
58.93	0.02956	59.28	0.01408		58.88	0.06383	59.03	0.04871
58.95	0	59.3	0.01207		58.9	0.02482	59.05	0.04585
58.97	0.02463	59.32	0.02213		58.92	0.03191	59.07	0.04585
58.99	0.02463	59.34	0.01207		58.94	0.05674	59.09	0.04298
59.01	0.04433	59.36	0.0161		58.96	0.04255	59.11	0.03725
59.03	0.02463	59.38	0.00402		58.98	0.01773	59.13	0.03438
59.05	0	59.4	0.01207		59	0.03901	59.15	0.02579
59.07	0.03941	59.42	0.01006		59.02	0.04255	59.17	0.02865
59.09	0.00985	59.44	0.01408		59.04	0.03546	59.19	0.04011
59.11	0.02956	59.46	0.02817		59.06	0.04965	59.21	0.02292
59.13	0.01478	59.48	0.00402		59.08	0.01418	59.23	0.02292
59.15	0.01478	59.5	0.00805		59.1	0.03901	59.25	0.04298
59.17	0	59.52	0.01006		59.12	0.04965	59.27	0.05731
59.19	0.0197	59.54	0.02012		59.14	0.04255	59.29	0.04011
59.21	0.02463	59.56	0.02012		59.16	0.03191	59.31	0.04298
59.23	0.02956	59.58	0.02012		59.18	0.04255	59.33	0.02579
59.25	0	59.6	0.01408		59.2	0.02482	59.35	0.03152
59.27	0.01478	59.62	0.0161		59.22	0.01773	59.37	0.03152
59.29	0.00493	59.64	0.01207		59.24	0.05674	59.39	0.02865
59.31	0.02463	59.66	0.01006		59.26	0.04255	59.41	0.04298
59.33	0.03941	59.68	0.01811		59.28	0.03901	59.43	0.03438
59.35	0.03448	59.7	0.01207		59.3	0.0461	59.45	0.04011
59.37	0.00493	59.72	0.00201		59.32	0.04255	59.47	0.03725
59.39	0.03941	59.74	0.0161		59.34	0.03546	59.49	0.03152
59.41	0	59.76	0.00604		59.36	0.03191	59.51	0.04871
59.43	0.02463	59.78	0.01006		59.38	0.03546	59.53	0.01719
59.45	0.00493	59.8	0.00805		59.4	0.04965	59.55	0.04585
59.47	0.02463	59.82	0.01811		59.42	0.02128	59.57	0.04298
59.49	0.01478	59.84	0.01006		59.44	0.05674	59.59	0.02579
59.51	0.02463	59.86	0.00604		59.46	0.0461	59.61	0.06304
59.53	0.02463	59.88	0.01006		59.48	0.01773	59.63	0.03152
59.55	0.05419	59.9	0.00604		59.5	0.02128	59.65	0.04298
59.57	0.02463	59.92	0.01207		59.52	0.04255	59.67	0.03152
59.59	0.0197	59.94	0.0161		59.54	0.03546	59.69	0.04298
59.61	0.01478	59.96	0.01811		59.56	0.03546	59.71	0.03725
59.63	0.03941	59.98	0.01207		59.58	0.04255	59.73	0.04011
59.65	0.0197	60	0.00402		59.6	0.03191	59.75	0.02579
59.67	0.0197	60.02	0.01408		59.62	0.03191	59.77	0.03438
59.69	0	60.04	0.02012		59.64	0.03546	59.79	0.04011
59.71	0	60.06	0.01207		59.66	0.05319	59.81	0.04871
59.73	0	60.08	0.01006		59.68	0.04965	59.83	0.04011
59.75	0.0197	60.1	0.00805		59.7	0.0461	59.85	0.02865
59.77	0	60.12	0.01408		59.72	0.03191	59.87	0.04871
59.79	0	60.14	0.0161		59.74	0.03546	59.89	0.04585
59.81	0.00985	60.16	0.01811		59.76	0.0461	59.91	0.02865
59.83	0.00493	60.18	0.01207		59.78	0.05319	59.93	0.02865
59.85	0	60.2	0.00805		59.8	0.04255	59.95	0.06017
59.87	0.01478	60.22	0.00805		59.82	0.03546	59.97	0.03438
59.89	0.0197	60.24	0.01006		59.84	0.03901	59.99	0.04011
59.91	0.0197	60.26	0.0161		59.86	0.04965	60.01	0.04011
59.93	0.03448	60.28	0.01006		59.88	0.0461	60.03	0.04585
59.95	0.04926	60.3	0.01811		59.9	0.07447	60.05	0.02865
59.97	0.00985	60.32	0.01207		59.92	0.08511	60.07	0.03725
59.99	0.00493	60.34	0.01811		59.94	0.07092	60.09	0.02006
60.01	0.02463	60.36	0.00604		59.96	0.05674	60.11	0.04585
60.03	0.03448	60.38	0.01207		59.98	0.06028	60.13	0.04871
60.05	0.01478	60.4	0.01207		60	0.07447	60.15	0.04298
60.07	0.00493	60.42	0.00805		60.02	0.06738	60.17	0.04298
60.09	0	60.44	0.01006		60.04	0.05674	60.19	0.03438
[truncated: 1,003 more rows]

## Sheet: Fig.4
					图4（c）						图4（d）											Fig. 4（e）											Fig. 4（f）
形成能						Ni-foil	无序NiCo	L10-NiCo			Ni-foil			NiCo-500			NiCo-780					Ni-foil			NiCo-500			NiCo-780					Ni-foil			NiCo-500			NiCo-780
1	-0.029	无序NiCo			X	Y	Y	Y			X	Y	fitting	X	Y	fitting	X	Y	fitting			X	Y	fitting	X	Y	fitting	X	Y	fitting			X	Y	Z	X	Y	Z	X	Y	Z
2	-0.266	L10-NiCo			8186.49	-0.05051	0.03072	0.000442666			0	0	0.00187	0	0	0.00393	0	0	0.000747541			0	0.11968	0.01426	0	0.10367	0.10402	0.05	0.01283	0.01426			-12.05	0	0.01272	-12.05	0	0.02524	-12.05	0	0.00571
					8188.54	-0.07477	0.04862	0.000109398			0.05	1.04938e-05	0.000487566	0.05	2.50486e-05	0.000954271	0.05	6.69994e-06	0.00011525			0.03068	0.12341	0.02433	0.03068	0.10401	0.10447	0.08068	0.01511	0.02433			-12.05	0.0249	0.02815	-12.05	0.0249	0.0559	-12.05	0.0249	0.01261
					8190.58	-0.0928	0.02729	0.000202855			0.1	8.39747e-05	-0.000370676	0.1	0.000200404	-0.000846009	0.1	5.3608e-05	-0.000232297			0.06136	0.13411	0.03455	0.06136	0.10496	0.10503	0.11136	0.02177	0.03455			-12.05	0.04979	0.03879	-12.05	0.04979	0.07731	-12.05	0.04979	0.01727
					8192.62	-0.11492	0.01122	0.000324638			0.15	0.000283551	-0.00070953	0.15	0.000676444	-0.00147	0.15	0.000180975	-0.000295102			0.09204	0.15056	0.04493	0.09204	0.1063	0.1057	0.14204	0.03242	0.04493			-12.05	0.07469	0.04561	-12.05	0.07469	0.09139	-12.05	0.07469	0.0201
					8194.66	-0.08496	0.00419	0.000157003			0.2	0.000672576	-0.000528995	0.2	0.0016	-0.000929508	0.2	0.000429135	-7.31635e-05			0.12272	0.17125	0.05547	0.12272	0.10775	0.10648	0.17272	0.04641	0.05547			-12.05	0.09959	0.04993	-12.05	0.09959	0.1008	-12.05	0.09959	0.02175
					8196.7	-0.06973	0.00755	0.00011589			0.25	0.00131	0.000170928	0.25	0.00313	0.000787272	0.25	0.000838548	0.000433518			0.1534	0.19465	0.06616	0.1534	0.10903	0.10737	0.2034	0.06295	0.06616			-12.05	0.12448	0.05237	-12.05	0.12448	0.10676	-12.05	0.12448	0.02259
					8198.74	-0.03952	0.02652	0.000102356			0.3	0.00227	0.00139	0.3	0.00541	0.00368	0.3	0.00145	0.00122			0.18408	0.21923	0.07701	0.18408	0.10996	0.10836	0.23408	0.08106	0.07701			-12.05	0.14938	0.05334	-12.05	0.14938	0.11007	-12.05	0.14938	0.0229
					8200.78	-0.04136	0.0218	-1.24522e-05			0.35	0.00362	0.00313	0.35	0.0086	0.00774	0.35	0.0023	0.0023			0.21476	0.24349	0.08802	0.21476	0.11047	0.10947	0.26476	0.09967	0.08802			-12.05	0.17427	0.05307	-12.05	0.17427	0.11125	-12.05	0.17427	0.02285
					8202.82	-0.06276	0.01328	-0.000215792			0.4	0.00541	0.00539	0.4	0.01284	0.01297	0.4	0.00344	0.00344			0.24544	0.26596	0.09918	0.24544	0.11064	0.11068	0.29544	0.11771	0.09918			-12.05	0.19917	0.05165	-12.05	0.19917	0.11061	-12.05	0.19917	0.02251
					8204.85	-0.01881	0.02908	-0.000154506			0.45	0.00771	0.00769	0.45	0.01828	0.0336	0.45	0.0049	0.0049			0.27612	0.28531	0.1105	0.27612	0.1107	0.11201	0.32612	0.13414	0.1105			-12.05	0.22407	0.04914	-12.05	0.22407	0.10836	-12.05	0.22407	0.02189
					8206.89	0.01229	0.000409935	-0.000237252			0.5	0.01059	0.01057	0.5	0.02506	0.04662	0.5	0.00673	0.00673			0.3068	0.30044	0.12198	0.3068	0.11097	0.11344	0.3568	0.14805	0.12198			-12.05	0.24896	0.04561	-12.05	0.24896	0.10478	-12.05	0.24896	0.02094
					8208.92	0.02186	-0.0108	-0.000418764			0.55	0.01413	0.0141	0.55	0.03334	0.05185	0.55	0.00897	0.00897			0.33748	0.31062	0.13361	0.33748	0.11178	0.11499	0.38748	0.15879	0.13361			-12.05	0.27386	0.04127	-12.05	0.27386	0.10017	-12.05	0.27386	0.01969
					8210.96	0.04562	0.00259	-0.000388088			0.6	0.01839	0.01836	0.6	0.04324	0.04975	0.6	0.01166	0.01166			0.36816	0.31566	0.1454	0.36816	0.11336	0.11664	0.41816	0.166	0.1454			-12.05	0.29875	0.03641	-12.05	0.29875	0.09494	-12.05	0.29875	0.01818
					8212.99	0.06371	-0.02123	-0.000243084			0.65	0.02343	0.0234	0.65	0.05488	0.04056	0.65	0.01484	0.01484			0.39884	0.31608	0.15465	0.39884	0.11581	0.11837	0.44884	0.16979	0.15465			-12.05	0.32365	0.03141	-12.05	0.32365	0.08942	-12.05	0.32365	0.01654
					8215.03	0.06329	-0.02575	-0.000312703			0.7	0.02935	0.02931	0.7	0.06835	0.02531	0.7	0.01856	0.01856			0.42951	0.31335	0.1643	0.42951	0.119	0.12001	0.47951	0.17081	0.1643			-12.05	0.34855	0.02666	-12.05	0.34855	0.08389	-12.05	0.34855	0.01489
					8217.06	0.05406	-0.01811	-0.000334469			0.75	0.0362	0.03616	0.75	0.08365	0.00562	0.75	0.02286	0.02286			0.46019	0.31004	0.17479	0.46019	0.12264	0.12163	0.51019	0.17043	0.17479			-12.05	0.37344	0.02242	-12.05	0.37344	0.07854	-12.05	0.37344	0.01332
					8219.09	0.06462	-0.0117	-0.00020869			0.8	0.04407	0.04402	0.8	0.10039	-0.01718	0.8	0.02778	0.02779			0.49087	0.30977	0.18653	0.49087	0.12635	0.12332	0.54087	0.17071	0.18653			-12.05	0.39834	0.01878	-12.05	0.39834	0.07367	-12.05	0.39834	0.01188
					8221.13	0.03819	-0.02292	-6.32052e-05			0.85	0.05303	0.05298	0.85	-0.11305	-0.0402	0.85	0.03336	0.03339			0.52155	0.31664	0.19981	0.52155	0.12972	0.12523	0.57155	0.17421	0.19981			-12.05	0.42324	0.01563	-12.05	0.42324	0.06981	-12.05	0.42324	0.01059
					8223.16	0.01798	-0.01395	-1.55904e-05			0.9	0.06318	0.06311	0.9	-0.12038	-0.06046	0.9	0.03966	0.05464			0.55223	0.33403	0.21477	0.55223	0.13245	0.1275	0.60223	0.1833	0.21477			-12.05	0.44813	0.01278	-12.05	0.44813	0.06764	-12.05	0.44813	0.00951
					8225.19	0.01905	-0.05939	-0.000361277			0.95	0.07458	0.0745	0.95	-0.11947	-0.07502	0.95	0.0467	0.06553			0.58291	0.36329	0.2313	0.58291	0.13443	0.13026	0.63291	0.19924	0.2313			-12.05	0.47303	0.01005	-12.05	0.47303	0.06778	-12.05	0.47303	0.00872
					8227.22	0.04843	-0.0257	-1.86374e-05			1	0.08734	0.08723	1	-0.11239	-0.08011	1	0.05453	0.06662			0.61359	0.40329	0.24911	0.61359	0.13573	0.13358	0.66359	0.22176	0.24911			-12.05	0.49793	0.00738	-12.05	0.49793	0.07022	-12.05	0.49793	0.00838
					8229.25	0.06783	-0.02796	0.000191488			1.05	0.10154	0.10136	1.05	-0.09149	-0.07233	1.05	0.06319	0.05897			0.64427	0.4511	0.26759	0.64427	0.13668	0.13747	0.69427	0.24931	0.26759			-12.05	0.52282	0.00491	-12.05	0.52282	0.07425	-12.05	0.52282	0.00853
					8231.28	0.09811	0.00142	-0.000237984			1.1	0.11727	0.15759	1.1	-0.05874	-0.0485	1.1	0.0727	0.04377			0.67495	0.50298	0.28599	0.67495	0.1378	0.14188	0.72495	0.27971	0.28599			-12.05	0.54772	0.00304	-12.05	0.54772	0.07873	-12.05	0.54772	0.00907
					8233.31	0.06908	-0.02962	0.000596905			1.15	0.13465	0.1899	1.15	-0.01604	-0.00621	1.15	0.08308	0.02272			0.70563	0.55512	0.30347	0.70563	0.13974	0.14666	0.75563	0.31067	0.30347			-12.05	0.57261	0.00266	-12.05	0.57261	0.08248	-12.05	0.57261	0.00978
					8235.34	0.08357	-0.00768	0.000979295			1.2	0.15378	0.19943	1.2	0.04628	0.05569	1.2	0.09429	-0.00235			0.73631	0.60397	0.31938	0.73631	0.14309	0.15161	0.78631	0.34003	0.31938			-12.05	0.59751	0.00359	-12.05	0.59751	0.08462	-12.05	0.59751	0.01043
					8237.37	0.05075	-0.03435	0.00123			1.25	0.17477	0.18779	1.25	0.11577	0.13757	1.25	-0.10531	-0.02905			0.76699	0.64648	0.33336	0.76699	0.1482	0.15647	0.81699	0.36593	0.33336			-12.05	0.62241	0.00464	-12.05	0.62241	0.08466	-12.05	0.62241	0.01087
					8239.4	0.07518	0.00225	0.00122			1.3	0.19777	0.15728	1.3	0.19123	0.21093	1.3	-0.11133	-0.05521			0.79767	0.68013	0.34547	0.79767	0.15506	0.16097	0.84767	0.38683	0.34547			-12.05	0.6473	0.00538	-12.05	0.6473	0.08243	-12.05	0.6473	0.01101
					8241.42	0.05764	-0.03251	0.0014			1.35	0.22294	0.11109	1.35	0.273	0.2828	1.35	-0.11257	-0.07811			0.82835	0.70315	0.35609	0.82835	0.16325	0.16494	0.87835	0.40164	0.35609			-12.05	0.6722	0.00574	-12.05	0.6722	0.07811	-12.05	0.6722	0.01081
					8243.45	0.02108	-0.03747	0.00133			1.4	0.25052	0.05287	1.4	0.34759	0.34644	1.4	-0.11064	-0.09527			0.85903	0.71468	0.36593	0.85903	0.17203	0.16831	0.90903	0.40978	0.36593			-12.05	0.6971	0.00576	-12.05	0.6971	0.07206	-12.05	0.6971	0.01032
					8245.48	0.07462	-0.00845	0.00145			1.45	0.28109	-0.01309	1.45	0.4099	0.39524	1.45	-0.10352	-0.10436			0.88971	0.71501	0.37593	0.88971	0.18052	0.17121	0.93971	0.41138	0.37593			-12.05	0.72199	0.00553	-12.05	0.72199	0.06479	-12.05	0.72199	0.00957
					8247.51	0.02744	-0.00919	0.00193			1.5	-0.30971	-0.08175	1.5	0.45	0.4216	1.5	-0.09315	-0.10319			0.92039	0.70598	0.38721	0.92039	0.18783	0.17391	0.97039	0.40743	0.38721			-12.05	0.74689	0.00513	-12.05	0.74689	0.05682	-12.05	0.74689	0.00866
					8249.54	0.05093	0.00162	0.00199			1.55	-0.3258	-0.14854	1.55	0.46071	0.41911	1.55	-0.07861	-0.08994			0.95107	0.69135	0.40106	0.95107	0.19324	0.17681	1.00107	0.4001	0.40106			-12.05	0.77178	0.00464	-12.05	0.77178	0.04868	-12.05	0.77178	0.00765
					8251.56	-0.00926	-0.01525	0.0022			1.6	-0.33237	-0.20795	1.6	0.43915	0.38334	1.6	-0.06439	-0.06306			0.98175	0.67722	0.41874	0.98175	0.1963	0.18033	1.03175	0.3929	0.41874			-12.05	0.79668	0.00413	-12.05	0.79668	0.04079	-12.05	0.79668	0.00661
					8253.59	-0.01648	-0.00565	0.00227			1.65	-0.32636	-0.2551	1.65	0.37556	0.3133	1.65	-0.04768	-0.05052			1.01243	0.67186	0.44136	1.01243	0.19696	0.1849	1.06243	0.39069	0.44136			-12.05	0.82158	0.00364	-12.05	0.82158	0.03348	-12.05	0.82158	0.00561
					8255.62	0.02549	0.02052	0.00255			1.7	-0.30733	-0.2853	1.7	0.26965	0.21075	1.7	-0.0349	-0.04061			1.04311	0.68452	0.46968	1.04311	0.1957	0.1909	1.09311	0.3989	0.46968			-12.05	0.84647	0.00318	-12.05	0.84647	0.02698	-12.05	0.84647	0.00468
					8257.64	0.01533	0.00225	0.00287			1.75	-0.2782	-0.29397	1.75	0.13367	0.08166	1.75	-0.02607	-0.03468			1.07379	0.72254	0.50387	1.07379	0.19361	0.1986	1.12379	0.42192	0.50387			-12.05	0.87137	0.00277	-12.05	0.87137	0.02138	-12.05	0.87137	0.00386
					8259.67	0.000609157	0.00238	0.00314			1.8	-0.2387	-0.27714	1.8	-0.02388	-0.06474	1.8	-0.02244	-0.03354			1.10447	0.7884	0.54335	1.10447	0.19241	0.20817	1.15447	0.46127	0.54335			-12.05	0.89627	0.0024	-12.05	0.89627	0.01671	-12.05	0.89627	0.00315
					8261.69	0.03567	0.00241	0.00387			1.85	-0.19158	-0.23085	1.85	-0.20463	-0.21569	1.85	-0.02529	-0.03691			1.13515	0.87898	0.58625	1.13515	0.19428	0.21957	1.18515	0.51518	0.58625			-12.05	0.92116	0.00207	-12.05	0.92116	0.01293	-12.05	0.92116	0.00255
					8263.72	0.0429	0.01857	0.0044			1.9	-0.14451	-0.15103	1.9	-0.37522	-0.35582	1.9	-0.03319	-0.04373			1.16583	0.9872	0.62866	1.16583	0.20127	0.23251	1.21583	0.57949	0.62866			-12.05	0.94606	0.00177	-12.05	0.94606	0.00994	-12.05	0.94606	0.00207
					8265.75	-0.00134	0.01184	0.00478			1.95	-0.09165	-0.10691	1.95	-0.51982	-0.47004	1.95	-0.04412	-0.05109			1.1965	1.10421	0.66405	1.1965	0.21457	0.24632	1.24651	0.64891	0.66405			-12.05	0.97095	0.0015	-12.05	0.97095	0.00762	-12.05	0.97095	0.00167
					8267.77	-0.00104	0.00827	0.00532			2	-0.04532	-0.0631	2	-0.62513	-0.54677	2	-0.05436	-0.05543			1.22718	1.22078	0.6864	1.22718	0.23396	0.25977	1.27718	0.71789	0.6864			-12.05	0.99585	0.00127	-12.05	0.99585	0.00586	-12.05	0.99585	0.00135
					8269.8	-0.04274	0.01495	0.00597			2.05	-0.00223	-0.02007	2.05	-0.67231	-0.57071	2.05	-0.05906	-0.05244			1.25786	1.32788	0.6939	1.25786	0.25794	0.27126	1.30786	0.78094	0.6939			-12.05	1.02075	0.00106	-12.05	1.02075	0.00453	-12.05	1.02075	0.0011
					8271.82	-0.04472	0.00541	0.00604			2.1	0.03744	0.02281	2.1	-0.65291	-0.53554	2.1	-0.05234	-0.03764			1.28854	1.41688	0.68831	1.28854	0.28423	0.27944	1.33854	0.83274	0.68831			-12.05	1.04564	0.000871711	-12.05	1.04564	0.00354	-12.05	1.04564	0.000894733
					8273.85	0.02317	0.03517	0.00435			2.15	0.07254	0.06741	2.15	-0.5692	-0.44614	2.15	-0.03028	-0.00735			1.31922	1.47965	0.67336	1.31922	0.31022	0.28382	1.36922	0.86825	0.67336			-12.05	1.07054	0.000713083	-12.05	1.07054	0.00279	-12.05	1.07054	0.000728215
					8275.87	-0.17286	0.01765	0.00616			2.2	0.10928	0.11603	2.2	-0.41487	-0.31731	2.2	0.01069	0.0405			1.3499	1.50883	0.65391	1.3499	0.33337	0.28492	1.3999	0.88287	0.65391			-12.05	1.09544	0.000577593	-12.05	1.09544	0.00221	-12.05	1.09544	0.000591821
					8277.89	-0.18549	0.01038	0.01059			2.25	0.15066	0.17108	2.25	-0.21318	-0.16378	2.25	0.07464	0.10697			1.38058	1.49823	0.63558	1.38058	0.35132	0.28394	1.43058	0.87273	0.63558			-12.05	1.12033	0.000463228	-12.05	1.12033	0.00177	-12.05	1.12033	0.000479398
					8279.92	0.02373	0.02865	0.01667			2.3	0.19992	0.23607	2.3	0.00691	-0.00473	2.3	0.1555	0.1884			1.41126	1.4436	0.62457	1.41126	0.3621	0.28252	1.46126	0.83517	0.62457			-12.05	1.14523	0.000367834	-12.05	1.14523	0.00142	-12.05	1.14523	0.000386445
					8281.94	-0.07179	0.00456	0.02298			2.35	0.26218	0.31113	2.35	0.22175	0.142	2.35	0.24711	0.2757			1.44194	1.34423	0.6276	1.44194	0.36424	0.28256	1.49194	0.76983	0.6276			-12.05	1.17012	0.000289212	-12.05	1.17012	0.00114	-12.05	1.17012	0.000309619
					8283.97	-0.05456	0.01644	0.04915			2.4	0.33753	0.39306	2.4	0.43341	0.26183	2.4	0.34425	0.35263			1.47262	1.20647	0.65174	1.47262	0.35714	0.28616	1.52262	0.68113	0.65174			-12.05	1.19502	0.000225201	-12.05	1.19502	0.000915045	-12.05	1.19502	0.000246347
					8285.99	-0.07197	-0.00782	0.09524			2.45	0.42243	0.4714	2.45	0.53393	0.34255	2.45	0.42929	0.40743			1.5033	1.05215	0.70408	1.5033	0.34155	0.29551	1.5533	0.58455	0.70408			-12.05	1.21992	0.000173734	-12.05	1.21992	0.000731425	-12.05	1.21992	0.000194553
					8288.01	-0.09117	0.01034	0.1961			2.5	0.51162	0.53571	2.5	0.51622	0.37715	2.5	0.48929	0.43045			1.53398	0.93666	0.79139	1.53398	0.32066	0.31291	1.58398	0.52034	0.79139			-12.05	1.24481	0.000132876	-12.05	1.24481	0.000582036	-12.05	1.24481	0.00015249
					8290.04	0.06647	-0.02908	0.25537			2.55	0.59291	0.57572	2.55	0.41772	0.36464	2.55	0.50986	0.41619			1.56466	0.96008	0.91967	1.56466	0.30175	0.34071	1.61466	0.55707	0.91967			-12.05	1.26971	0.000100852	-12.05	1.26971	0.00046075	-12.05	1.26971	0.000118639
					8292.06	-0.04128	0.00193	0.3193			2.6	0.65279	0.58268	2.6	0.31267	0.30888	2.6	0.45749	0.36578			1.59534	1.19619	1.0938	1.59534	0.29782	0.38121	1.64534	0.72954	1.0938			-12.05	1.29461	7.60637e-05	-12.05	1.29461	0.000362717	-12.05	1.29461	9.16615e-05
					8294.08	-0.07013	0.01447	0.34187			2.65	0.6776	0.55399	2.65	0.18325	0.21996	2.65	0.33219	0.28167			1.62602	1.61944	1.31725	1.62602	0.32444	0.43655	1.67602	1.00862	1.31725			-12.05	1.3195	5.71004e-05	-12.05	1.3195	0.00028394	-12.05	1.3195	7.03732e-05
					8296.1	0.0076	0.0083	0.38036			2.7	0.62711	0.48655	2.7	0.05457	0.11157	2.7	0.15492	0.17054			1.6567	2.17462	1.59176	1.6567	0.38999	0.5085	1.7067	1.36019	1.59176			-12.05	1.3444	4.27427e-05	-12.05	1.3444	0.000221054	-12.05	1.3444	5.37342e-05
					8298.13	0.09511	-0.01483	0.41567			2.75	0.49359	0.38142	2.75	-0.05626	-0.00148	2.75	0.00239	0.04359			1.68738	2.82478	1.91708	1.68738	0.49159	0.59838	1.73738	1.76408	1.91708			-12.05	1.36929	3.19607e-05	-12.05	1.36929	0.000171193	-12.05	1.36929	4.08433e-05
					8300.15	0.09273	-0.01766	0.46658			2.8	0.28924	0.24581	2.8	-0.15406	-0.10376	2.8	-0.13633	-0.08631			1.71806	3.54684	2.29072	1.71806	0.6219	0.70688	1.76806	2.20756	2.29072			-12.05	1.39419	2.39057e-05	-12.05	1.39419	0.000131923	-12.05	1.39419	3.09326e-05
					8302.17	-0.02917	0.02402	0.53455			2.85	0.075	0.08839	2.85	-0.22416	-0.17814	2.85	-0.24397	-0.20578			1.74874	4.32343	2.70779	1.74874	0.77422	0.83396	1.79874	2.68051	2.70779			-12.05	1.41909	1.78984e-05	-12.05	1.41909	0.000101189	-12.05	1.41909	2.33607e-05
					8304.19	-0.17588	0.01577	0.59025			2.9	-0.13194	-0.07877	2.9	-0.2612	-0.2195	2.9	-0.31605	-0.30142			1.77942	5.13899	3.16086	1.77942	0.94328	0.97878	1.82942	3.17351	3.16086			-12.05	1.44398	1.34107e-05	-12.05	1.44398	7.72749e-05	-12.05	1.44398	1.76028e-05
					8306.22	0.20852	-0.0304	0.69154			2.95	-0.30745	-0.24028	2.95	-0.27011	-0.23014	2.95	-0.37843	-0.36263			1.8101	5.97818	3.63988	1.8101	1.12475	1.13965	1.8601	3.67715	3.63988			-12.05	1.46888	1.00443e-05	-12.05	1.46888	5.87673e-05	-12.05	1.46888	1.32378e-05
					8308.24	-0.11193	-0.0291	0.78791			3	-0.43361	-0.38039	3	-0.24992	-0.21498	3	-0.4014	-0.38531			1.84078	6.82534	4.13233	1.84078	1.31473	1.31394	1.89078	4.18179	4.13233			-12.05	1.49378	7.50592e-06	-12.05	1.49378	4.45135e-05	-12.05	1.49378	9.93486e-06
					8310.26	0.05384	-0.00434	0.85566			3.05	-0.54237	-0.48361	3.05	-0.20342	-0.17679	3.05	-0.38521	-0.37068			1.87146	7.66447	4.62355	1.87146	1.5095	1.49818	1.92146	4.67762	4.62355			-12.05	1.51867	5.58363e-06	-12.05	1.51867	3.3585e-05	-12.05	1.51867	7.43782e-06
					8312.28	-0.21617	0.00292	0.90485			3.1	-0.59145	-0.53581	3.1	-0.13931	-0.12333	3.1	-0.34401	-0.32442			1.90214	8.47933	5.09775	1.90214	1.70546	1.68803	1.95214	5.15483	5.09775			-12.05	1.54357	4.1249e-06	-12.05	1.54357	2.5241e-05	-12.05	1.54357	5.55128e-06
					8314.3	0.23999	0.02369	0.91091			3.15	-0.57796	-0.5307	3.15	-0.06163	-0.06294	3.15	-0.27067	-0.249			1.93282	9.2538	5.54035	1.93282	1.89909	1.87858	1.98282	5.60381	5.54035			-12.05	1.56847	3.01915e-06	-12.05	1.56847	1.8896e-05	-12.05	1.56847	4.12727e-06
					8316.33	0.2477	0.01908	0.90403			3.2	-0.52704	-0.46894	3.2	0.01686	-0.00348	3.2	-0.16804	-0.14948			1.9635	9.97219	5.94127	1.9635	2.08695	2.06471	2.0135	6.01535	5.94127			-12.05	1.59336	2.18469e-06	-12.05	1.59336	1.40898e-05	-12.05	1.59336	3.05415e-06
					8318.35	0.34814	0.0435	0.88893			3.25	-0.41892	-0.35667	3.25	0.08309	0.04628	3.25	-0.04732	-0.03168			1.99418	10.6197	6.2945	1.99418	2.26577	2.24172	2.04418	6.38096	6.2945			-12.05	1.61826	1.55971e-06	-12.05	1.61826	1.04636e-05	-12.05	1.61826	2.24764e-06
					8320.37	0.35271	0.01591	0.89776			3.3	-0.25868	-0.2014	3.3	0.12793	0.07967	3.3	0.08859	0.09685			2.02485	11.1826	6.59483	2.02485	2.43246	2.40594	2.07485	6.69305	6.59483			-12.05	1.64315	1.09645e-06	-12.05	1.64315	7.73842e-06	-12.05	1.64315	1.64384e-06
					8321.38	0.37272	0.02429	0.91974			3.35	-0.06418	-0.01582	3.35	0.15027	0.09287	3.35	0.22777	0.22404			2.05553	11.649	6.8372	2.05553	2.58419	2.55469	2.10553	6.94514	6.8372			-12.05	1.66805	7.5737e-07	-12.05	1.66805	5.69876e-06	-12.05	1.66805	1.19405e-06
					8321.63	0.36393	0.01865	0.94473			3.4	0.15853	0.18649	3.4	0.14067	0.084	3.4	0.35409	0.34008			2.08621	12.0089	7.01728	2.08621	2.71845	2.68582	2.13621	7.13212	7.01728			-12.05	1.69295	5.12809e-07	-12.05	1.69295	4.17856e-06	-12.05	1.69295	8.61005e-07
					8321.89	0.39448	0.02155	0.9584			3.45	0.39153	0.39085	3.45	0.10109	0.05461	3.45	0.45694	0.43577			2.11689	12.2545	7.13193	2.11689	2.83307	2.79745	2.16689	7.25034	7.13193			-12.05	1.71784	3.39336e-07	-12.05	1.71784	3.05043e-06	-12.05	1.71784	6.16097e-07
					8322.14	0.40905	0.01849	0.95692			3.5	0.60577	0.57728	3.5	0.03949	0.0098	3.5	0.53335	0.50145			2.14757	12.3805	7.17937	2.14757	2.92631	2.88799	2.19757	7.29774	7.17937			-12.05	1.74274	2.18586e-07	-12.05	1.74274	2.21695e-06	-12.05	1.74274	4.37353e-07
					8322.39	0.41873	0.02523	0.94361			3.55	0.78733	0.72908	3.55	-0.03339	-0.0426	3.55	0.56703	0.53094			2.17825	12.3846	7.15929	2.17825	2.99687	2.95622	2.22825	7.2739	7.15929			-12.05	1.76764	1.36345e-07	-12.05	1.76764	1.60397e-06	-12.05	1.76764	3.07942e-07
					8322.64	0.42355	0.01648	0.93268			3.6	0.91968	0.83254	3.6	-0.10778	-0.09283	3.6	0.55298	0.52106			2.20893	12.2667	7.0729	2.20893	3.04392	3.00137	2.25893	7.18006	7.0729			-12.05	1.79253	8.17996e-08	-12.05	1.79253	1.15523e-06	-12.05	1.79253	2.15032e-07
					8322.9	0.43938	0.02775	0.9214			3.65	0.97678	0.87458	3.65	-0.16891	-0.13079	3.65	0.49662	0.47107			2.23961	12.0299	6.92282	2.23961	3.06713	3.02318	2.28961	7.01908	6.92282			-12.05	1.81743	4.69085e-08	-12.05	1.81743	8.28269e-07	-12.05	1.81743	1.48898e-07
					8323.15	0.44151	0.00374	0.90717			3.7	0.94667	0.84832	3.7	-0.20417	-0.14755	3.7	0.40243	0.38382			2.27029	11.68	6.71309	2.27029	3.0667	3.02199	2.32029	6.79528	6.71309			-12.05	1.84232	2.59219e-08	-12.05	1.84232	5.91161e-07	-12.05	1.84232	1.02234e-07
					8323.4	0.45228	0.01558	0.89032			3.75	0.84435	0.75271	3.75	-0.20852	-0.13671	3.75	0.27387	0.26486			2.30097	11.2251	6.44891	2.30097	3.04336	2.99878	2.35097	6.51439	6.44891			-12.05	1.86722	1.49542e-08	-12.05	1.86722	4.2003e-07	-12.05	1.86722	6.95979e-08
					8323.65	0.46223	0.00984	0.88047			3.8	0.66433	0.59192	3.8	-0.17131	-0.09488	3.8	0.12033	0.12114			2.33165	10.6757	6.13657	2.33165	2.9984	2.9552	2.38165	6.18324	6.13657			-12.05	1.89212	1.08819e-08	-12.05	1.89212	2.97101e-07	-12.05	1.89212	4.69747e-08
					8323.91	0.43597	0.02145	0.87663			3.85	0.41915	0.37618	3.85	-0.09177	-0.02346	3.85	-0.04443	-0.03944			2.36233	10.0442	5.78312	2.36233	2.93365	2.89362	2.41233	5.80962	5.78312			-12.05	1.91701	9.89465e-09	-12.05	1.91701	2.09217e-07	-12.05	1.91701	3.14321e-08
					8324.16	0.45346	0.02903	0.87523			3.9	0.13069	0.11997	3.9	0.02261	0.07169	3.9	-0.21571	-0.2079			2.39301	9.34476	5.39616	2.39301	2.85152	2.81704	2.44301	5.40196	5.39616			-12.05	1.94191	9.32172e-09	-12.05	1.94191	1.46681e-07	-12.05	1.94191	2.08496e-08
					8324.41	0.45099	0.03547	0.87764			3.95	-0.17841	-0.16041	3.95	0.15682	0.18091	3.95	-0.38553	-0.3765			2.42369	8.59239	4.98344	2.42369	2.755	2.72901	2.47369	4.96903	4.98344			-12.05	1.9668	8.46107e-09	-12.05	1.9668	1.0239e-07	-12.05	1.9668	1.37095e-08
					8324.66	0.46297	0.0509	0.88753			4	-0.49262	-0.44742	4	0.29826	0.29193	4	-0.54638	-0.53852			2.45437	7.80299	4.55119	2.45437	2.64763	2.63344	2.50437	4.51971	4.55119			-12.05	1.9917	7.35623e-09	-12.05	1.9917	7.11656e-08	-12.05	1.9917	8.93616e-09
					8324.92	0.46392	0.04977	0.90264			4.05	-0.78967	-0.72436	4.05	0.42859	0.39101	4.05	-0.69217	-0.68769			2.48505	6.99263	4.09413	2.48505	2.53352	2.53441	2.53505	4.06259	4.09413			-12.05	2.0166	6.16852e-09	-12.05	2.0166	4.9254e-08	-12.05	2.0166	5.77476e-09
					8325.17	0.47459	0.06045	0.92411			4.1	-1.05137	-0.97895	4.1	0.52951	0.4651	4.1	-0.81989	-0.81829			2.51573	6.17708	3.62199	2.51573	2.41728	2.43593	2.56573	3.60575	3.62199			-12.05	2.04149	5.02443e-09	-12.05	2.04149	3.3947e-08	-12.05	2.04149	3.70096e-09
					8325.42	0.46611	0.04844	0.94927			4.15	-1.26702	-1.20253	4.15	0.58584	0.50344	4.15	-0.92556	-0.92498			2.54641	5.37143	3.15086	2.54641	2.3039	2.34171	2.59641	3.15649	3.15086			-12.05	2.06639	3.99737e-09	-12.05	2.06639	2.33014e-08	-12.05	2.06639	2.35397e-09
					8325.67	0.47161	0.059	0.97864			4.2	-1.4334	-1.38902	4.2	0.5876	0.49842	4.2	-1.00544	-1.00272			2.57709	4.58964	2.69501	2.57709	2.19855	2.25503	2.62709	2.72103	2.69501			-12.05	2.09129	3.11909e-09	-12.05	2.09129	1.59301e-08	-12.05	2.09129	1.48792e-09
					8325.93	0.48811	0.05364	1.00221			4.25	-1.55305	-1.53694	4.25	0.53109	0.44767	4.25	-1.05495	-1.04668			2.60777	3.84431	2.26648	2.60777	2.10622	2.17852	2.65777	2.30441	2.26648			-12.05	2.11618	2.39429e-09	-12.05	2.11618	1.0848e-08	-12.05	2.11618	9.369e-10
					8326.18	0.47271	0.04785	1.01771			4.3	-1.63043	-1.64741	4.3	0.4198	0.35398	4.3	-1.06837	-1.05283			2.63845	3.14657	1.87502	2.63845	2.03123	2.11412	2.68845	1.91032	1.87502			-12.05	2.14108	1.81227e-09	-12.05	2.14108	7.35902e-09	-12.05	2.14108	5.89985e-10
					8326.43	0.48379	0.05263	1.02125			4.35	-1.67362	-1.72089	4.35	0.26445	0.22502	4.35	-1.04139	-1.01806			2.66913	2.50623	1.52821	2.66913	1.97663	2.06293	2.71913	1.54109	1.52821			-12.05	2.16598	1.355e-09	-12.05	2.16598	4.97365e-09	-12.05	2.16598	3.73724e-10
					8326.68	0.49224	0.06618	1.01076			4.4	-1.69046	-1.75627	4.4	0.0807	0.07206	4.4	-0.96942	-0.94125			2.69981	1.93274	1.23148	2.69981	1.94366	2.02527	2.74981	1.19775	1.23148			-12.05	2.19087	1.00214e-09	-12.05	2.19087	3.34938e-09	-12.05	2.19087	2.39935e-10
					8326.94	0.50134	0.07913	0.99053			4.45	-1.68369	-1.74999	4.45	-0.11314	-0.09119	4.45	-0.84974	-0.82335			2.73049	1.43761	0.98829	2.73049	1.93144	2.00062	2.78049	0.88027	0.98829			-12.05	2.21577	7.33963e-10	-12.05	2.21577	2.24772e-09	-12.05	2.21577	1.57343e-10
					8327.19	0.50403	0.06193	0.96373			4.5	-1.64152	-1.69426	4.5	-0.29902	-0.25059	4.5	-0.68818	-0.66806			2.76117	1.04073	0.80018	2.76117	1.93708	1.9877	2.81117	0.58817	0.80018			-12.05	2.24066	5.32794e-10	-12.05	2.24066	1.50335e-09	-12.05	2.24066	1.05954e-10
					8327.44	0.51749	0.07235	0.93571			4.55	-1.56076	-1.57768	4.55	-0.45989	-0.39329	4.55	-0.49173	-0.48156			2.79184	0.78211	0.66701	2.79184	1.9562	1.98456	2.84185	0.32279	0.66701			-12.05	2.26556	3.83619e-10	-12.05	2.26556	1.00226e-09	-12.05	2.26556	7.32886e-11
					8327.7	0.52661	0.08806	0.91674			4.6	-1.42404	-1.38639	4.6	-0.5826	-0.50924	4.6	-0.26609	-0.2714			2.82252	0.71186	0.58703	2.82252	1.98352	1.9887	2.87252	0.11565	0.58703			-12.05	2.29046	2.74131e-10	-12.05	2.29046	6.66127e-10	-12.05	2.29046	5.18222e-11
					8327.95	0.5131	0.0677	0.90246			4.65	-1.20709	-1.10614	4.65	-0.66056	-0.59214	4.65	-0.02352	-0.04496			2.8532	0.80822	0.55711	2.8532	2.01366	1.9972	2.9032	0.21078	0.55711			-12.05	2.31535	1.94513e-10	-12.05	2.31535	4.41419e-10	-12.05	2.31535	3.71759e-11
					8328.2	0.54128	0.09566	0.89512			4.7	-0.88255	-0.72581	4.7	-0.6914	-0.63986	4.7	0.22204	0.19151			2.88388	0.98275	0.57291	2.88388	2.0416	2.00696	2.93388	0.4175	0.57291			-12.05	2.34025	1.37106e-10	-12.05	2.34025	2.91688e-10	-12.05	2.34025	2.68535e-11
					8328.45	0.5473	0.09925	0.89496			4.75	-0.44107	-0.24081	4.75	-0.68055	-0.65394	4.75	0.46397	0.43411			2.91456	1.17674	0.62906	2.91456	2.06307	2.01487	2.96456	0.61988	0.62906			-12.05	2.36515	9.60351e-11	-12.05	2.36515	1.92227e-10	-12.05	2.36515	1.94165e-11
					8328.71	0.55239	0.10429	0.89686			4.8	0.12427	0.34399	4.8	-0.6387	-0.63859	4.8	0.69759	0.68193			2.94524	1.36744	0.71933	2.94524	2.07471	2.01803	2.99524	0.81115	0.71933			-12.05	2.39004	6.6866e-11	-12.05	2.39004	1.26353e-10	-12.05	2.39004	1.39975e-11
					8328.96	0.56268	0.1192	0.89586			4.85	0.80428	1.0124	4.85	-0.57666	-0.59954	4.85	0.92527	0.93666			2.97592	1.54732	0.83682	2.97592	2.07415	2.014	3.02592	0.98995	0.83682			-12.05	2.41494	4.62909e-11	-12.05	2.41494	8.28476e-11	-12.05	2.41494	1.0037e-11
					8329.21	0.5642	0.132	0.88694			4.9	1.5682	1.73496	4.9	-0.50399	-0.54266	4.9	1.15594	1.20013			3.0066	1.71398	0.9741	3.0066	2.06	2.001	3.0566	1.15529	0.9741			-12.05	2.43983	3.18711e-11	-12.05	2.43983	5.41917e-11	-12.05	2.43983	7.14929e-12
					8329.46	0.5745	0.1421	0.89486			4.95	2.37383	2.47026	4.95	-0.42887	-0.47282	4.95	1.39774	1.47159			3.03728	1.86632	1.12334	3.03728	2.03183	1.978	3.08728	1.30604	1.12334			-12.05	2.46473	2.18271e-11	-12.05	2.46473	3.5365e-11	-12.05	2.46473	5.0556e-12
					8329.72	0.58686	0.1584	0.90119			5	3.16412	3.16637	5	-0.35545	-0.39298	5	1.65112	1.74519			3.06796	2.00327	1.27645	3.06796	1.99009	1.94482	3.11796	1.44095	1.27645			-12.05	2.48963	1.4872e-11	-12.05	2.48963	2.30263e-11	-12.05	2.48963	3.54853e-12
					8329.97	0.59132	0.16507	0.90659			5.05	3.86729	3.7662	5.05	-0.2831	-0.30383	5.05	1.91299	2.0074			3.09864	2.12349	1.42516	3.09864	1.93602	1.90206	3.14864	1.5588	1.42516			-12.05	2.51452	1.00829e-11	-12.05	2.51452	1.49587e-11	-12.05	2.51452	2.47237e-12
					8330.22	0.61093	0.19199	0.91184			5.1	4.41381	4.21176	5.1	-0.20571	-0.20414	5.1	2.16598	2.23365			3.12932	2.22553	1.56109	3.12932	1.87156	1.85096	3.17932	1.6586	1.56109			-12.05	2.53942	6.80297e-12	-12.05	2.53942	9.69586e-12	-12.05	2.53942	1.71017e-12
					8330.47	0.62097	0.2193	0.91595			5.15	4.74336	4.45276	5.15	-0.11692	-0.09138	5.15	2.37818	2.39093			3.16	2.30813	1.67585	3.16	1.79922	1.79321	3.21	1.73971	1.67585			-12.05	2.56432	4.56845e-12	-12.05	2.56432	6.27041e-12	-12.05	2.56432	1.17472e-12
					8330.73	0.63275	0.23348	0.91956			5.2	4.80704	4.45172	5.2	-0.01014	0.03693	5.2	2.50404	2.44101			3.19068	2.37049	1.76133	3.19068	1.7219	1.73074	3.24068	1.80197	1.76133			-12.05	2.58921	3.05381e-12	-12.05	2.58921	4.04584e-12	-12.05	2.58921	8.01506e-13
					8330.98	0.64578	0.25825	0.9233			5.25	4.56647	4.18933	5.25	0.12026	0.18162	5.25	2.49219	2.34622			3.22136	2.41251	1.81196	3.22136	1.6427	1.66545	3.27136	1.84578	1.81196			-12.05	2.61411	2.0322e-12	-12.05	2.61411	2.60438e-12	-12.05	2.61411	5.43345e-13
					8331.23	0.6676	0.28739	0.92775			5.3	4.01781	3.66742	5.3	0.27579	0.34101	5.3	2.29571	2.07694			3.25204	2.43502	1.84123	3.25204	1.56466	1.59908	3.30204	1.87212	1.84123			-12.05	2.639	1.34641e-12	-12.05	2.639	1.67247e-12	-12.05	2.639	3.6606e-13
					8331.48	0.68441	0.31422	0.93396			5.35	3.18843	2.90905	5.35	0.45239	0.5099	5.35	1.88187	1.61945			3.28272	2.43976	1.85642	3.28272	1.49048	1.53307	3.33272	1.88255	1.85642			-12.05	2.6639	8.88216e-13	-12.05	2.6639	1.07137e-12	-12.05	2.6639	2.45156e-13
					8331.74	0.70545	0.35067	0.94093			5.4	2.13003	1.95698	5.4	0.64075	0.67921	5.4	1.23672	0.98161			3.3134	2.4294	1.85963	3.3134	1.42219	1.46844	3.3634	1.87915	1.85963			-12.05	2.6888	5.83473e-13	-12.05	2.6888	6.84571e-13	-12.05	2.6888	1.63248e-13
					8331.99	0.72799	0.39716	0.94819			5.45	0.90832	0.86899	5.45	0.82631	0.83652	5.45	0.39677	0.19613			3.34408	2.40743	1.853	3.34408	1.36088	1.40577	3.39408	1.86445	1.853			-12.05	2.71369	3.81695e-13	-12.05	2.71369	4.36276e-13	-12.05	2.71369	1.08109e-13
					8332.24	0.75159	0.43707	0.95661			5.5	-0.37663	-0.28826	5.5	0.99058	0.9673	5.5	-0.57673	-0.67967			3.37476	2.37799	1.83884	3.37476	1.30655	1.34514	3.42476	1.84132	1.83884			-12.05	2.73859	2.48677e-13	-12.05	2.73859	2.77291e-13	-12.05	2.73859	7.12143e-14
					8332.49	0.76649	0.46474	0.96197			5.55	-1.63737	-1.44573	5.55	1.11363	1.05652	5.55	-1.59465	-1.56954			3.40544	2.34564	1.81962	3.40544	1.25806	1.28622	3.45544	1.81287	1.81962			-12.05	2.76349	1.61363e-13	-12.05	2.76349	1.75757e-13	-12.05	2.76349	4.66706e-14
					8332.75	0.784	0.49562	0.96923			5.6	-2.79576	-2.53874	5.6	1.17715	1.09058	5.6	-2.55119	-2.38879			3.43612	2.31517	1.79779	3.43612	1.21338	1.2282	3.48612	1.78226	1.79779			-12.05	2.78838	1.04292e-13	-12.05	2.78838	1.11086e-13	-12.05	2.78838	3.04342e-14
					8333	0.79709	0.52101	0.97652			5.65	-3.78931	-3.51254	5.65	1.16685	1.05941	5.65	-3.33711	-3.05692			3.4668	2.2913	1.77577	3.4668	1.16985	1.16982	3.5168	1.75254	1.77577			-12.05	2.81328	6.71419e-14	-12.05	2.81328	7.00095e-14	-12.05	2.81328	1.9751e-14
					8333.25	0.81021	0.54675	0.98361			5.7	-4.57712	-4.32638	5.7	1.07259	0.95806	5.7	-3.86469	-3.51052			3.49748	2.27844	1.75578	3.49748	1.12462	1.1089	3.54748	1.72655	1.75578			-12.05	2.83817	4.30582e-14	-12.05	2.83817	4.39926e-14	-12.05	2.83817	1.2758e-14
					8333.51	0.82079	0.5658	0.99112			5.75	-5.14293	-4.9551	5.75	0.89458	0.78786	5.75	-4.08103	-3.71516			3.52816	2.28048	1.73978	3.52816	1.07498	1.04169	3.57816	1.70666	1.73978			-12.05	2.86307	2.75079e-14	-12.05	2.86307	2.7562e-14	-12.05	2.86307	8.20354e-15
					8333.76	0.8305	0.583	0.99988			5.8	-5.49105	-5.38787	5.8	0.64209	0.55682	5.8	-3.97376	-3.67252			3.55884	2.30052	1.72941	3.55884	1.01872	0.96671	3.60884	1.69475	1.72941			-12.05	2.88797	1.75072e-14	-12.05	2.88797	1.72161e-14	-12.05	2.88797	5.25158e-15
					8334.01	0.83831	0.59653	1.00961			5.85	-5.63649	-5.62416	5.85	0.33207	0.2792	5.85	-3.58616	-3.41777			3.58952	2.34073	1.72592	3.58952	0.95422	0.8859	3.63952	1.69205	1.72592			-12.05	2.91286	1.11006e-14	-12.05	2.91286	1.07212e-14	-12.05	2.91286	3.3473e-15
					8334.26	0.84624	0.61623	1.02065			5.9	-5.60465	-5.66918	5.9	-0.01375	-0.02582	5.9	-3.00548	-3.0127			3.62019	2.40218	1.73018	3.62019	0.88062	0.80208	3.67019	1.69917	1.73018			-12.05	2.93776	7.01233e-15	-12.05	2.93776	6.6562e-15	-12.05	2.93776	2.12449e-15
					8334.52	0.85104	0.62599	1.03105			5.95	-5.42094	-5.52759	5.95	-0.36583	-0.33605	5.95	-2.34122	-2.53217			3.65087	2.48476	1.74266	3.65087	0.79782	0.71806	3.70087	1.71612	1.74266			-12.05	2.96266	4.41345e-15	-12.05	2.96266	4.11986e-15	-12.05	2.96266	1.34278e-15
					8334.77	0.85623	0.63708	1.03964			6	-5.09715	-5.20034	6	-0.69569	-0.6286	6	-1.70656	-2.04716			3.68155	2.58718	1.76343	3.68155	0.70642	0.63651	3.73155	1.74242	1.76343			-12.05	2.98755	2.76762e-15	-12.05	2.98755	2.54221e-15	-12.05	2.98755	8.45243e-16
					8335.02	0.86203	0.65133	1.04681			6.05	-4.6303	-4.68289	6.05	-0.97773	-0.8822	6.05	-1.19536	-1.60759			3.71223	2.70703	1.79221	3.71223	0.60772	0.55985	3.76223	1.7772	1.79221			-12.05	3.01245	1.72924e-15	-12.05	3.01245	1.56391e-15	-12.05	3.01245	5.29918e-16
					8335.27	0.86511	0.6593	1.0518			6.1	-4.01238	-3.96586	6.1	-1.19087	-1.07938	6.1	-0.84795	-1.2301			3.74291	2.84083	1.82845	3.74291	0.50367	0.49021	3.79291	1.81937	1.82845			-12.05	3.03734	1.07655e-15	-12.05	3.03734	9.59159e-16	-12.05	3.03734	3.30913e-16
					8335.53	0.86789	0.66462	1.05498			6.15	-3.21671	-3.03864	6.15	-1.32103	-1.20832	6.15	-0.64446	-0.89309			3.77359	2.98428	1.87135	3.77359	0.39696	0.42938	3.82359	1.86772	1.87135			-12.05	3.06224	6.6781e-16	-12.05	3.06224	5.86476e-16	-12.05	3.06224	2.05834e-16
					8335.78	0.8716	0.67536	1.05466			6.2	-2.20643	-1.89549	6.2	-1.36375	-1.26375	6.2	-0.50823	-0.54035			3.80427	3.13239	1.91996	3.80427	0.2915	0.37878	3.85427	1.92101	1.91996			-12.05	3.08714	4.12779e-16	-12.05	3.08714	3.57517e-16	-12.05	3.08714	1.27539e-16
					8336.03	0.87353	0.67905	1.05178			6.25	-0.95864	-0.54302	6.25	-1.32297	-1.24672	6.25	-0.31945	-0.09528			3.83495	3.27974	1.97323	3.83495	0.19452	0.33934	3.88495	1.97802	1.97323			-12.05	3.11203	2.54235e-16	-12.05	3.11203	2.17288e-16	-12.05	3.11203	7.8723e-17
					8336.28	0.87777	0.68733	1.04593			6.3	0.52143	0.99463	6.3	-1.20988	-1.16431	6.3	0.05552	0.51887			3.86563	3.42071	2.03011	3.86563	0.12626	0.31153	3.91563	2.03767	2.03011			-12.05	3.13693	1.56031e-16	-12.05	3.13693	1.31666e-16	-12.05	3.13693	4.84075e-17
					8336.54	0.87787	0.69039	1.03791			6.35	2.20449	2.66603	6.35	-1.04095	-1.02853	6.35	0.72642	1.35401			3.89631	3.54974	2.0896	3.89631	0.13002	0.29525	3.94631	2.09895	2.0896			-12.05	3.16183	9.54225e-17	-12.05	3.16183	7.95456e-17	-12.05	3.16183	2.96543e-17
					8336.79	0.88039	0.69921	1.02803			6.4	4.02273	4.38995	6.4	-0.8355	-0.85416	6.4	1.74438	2.41357			3.92699	3.66157	2.15081	3.92699	0.1911	0.28986	3.97699	2.16106	2.15081			-12.05	3.18672	5.8151e-17	-12.05	3.18672	4.79147e-17	-12.05	3.18672	1.80984e-17
					8337.04	0.88202	0.70326	1.01702			6.45	5.86842	6.05851	6.45	-0.61312	-0.65688	6.45	3.07656	3.63847			3.95767	3.75146	2.21298	3.95767	0.26318	0.29417	4.00767	2.22332	2.21298			-12.05	3.21162	3.53131e-17	-12.05	3.21162	2.87763e-17	-12.05	3.21162	1.10046e-17
					8337.29	0.88426	0.70944	1.00752			6.5	7.59942	7.54421	6.5	-0.39131	-0.45137	6.5	4.59691	4.906			3.98835	3.8154	2.27552	3.98835	0.33009	0.3065	4.03835	2.28524	2.27552			-12.05	3.23651	2.13692e-17	-12.05	3.23651	1.72313e-17	-12.05	3.23651	6.66664e-18
					8337.55	0.88714	0.71689	0.99707			6.55	9.05169	8.71037	6.55	-0.18361	-0.24975	6.55	6.09695	6.04272			4.01903	3.8503	2.33799	4.01903	0.38657	0.32469	4.06903	2.34648	2.33799			-12.05	3.26141	1.28861e-17	-12.05	3.26141	1.02877e-17	-12.05	3.26141	4.02382e-18
					8337.8	0.88941	0.72431	0.9876			6.6	10.0575	9.42653	6.6	0.003	-0.06034	6.6	7.3163	6.85029			4.04971	3.85408	2.40011	4.04971	0.43036	0.34613	4.09971	2.40687	2.40011			-12.05	3.28631	7.74339e-18	-12.05	3.28631	6.12404e-18	-12.05	3.28631	2.4198e-18
					8338.05	0.89192	0.73138	0.97791			6.65	10.4673	9.5859	6.65	0.1629	0.11258	6.65	7.97432	7.14087			4.08039	3.82579	2.46175	4.08039	0.4604	0.36773	4.13039	2.46637	2.46175			-12.05	3.3112	4.63688e-18	-12.05	3.3112	3.63474e-18	-12.05	3.3112	1.44988e-18
					8338.3	0.89371	0.73768	0.96883			6.7	10.1454	9.12103	6.7	0.29835	0.26865	6.7	7.84423	6.77538			4.11107	3.76563	2.52284	4.11107	0.4764	0.38582	4.16107	2.52504	2.52284			-12.05	3.3361	2.76697e-18	-12.05	3.3361	2.15091e-18	-12.05	3.3361	8.65576e-19
					8338.56	0.89708	0.74565	0.96264			6.75	9.05371	8.01589	6.75	0.41552	0.41054	6.75	6.81541	5.69666			4.14175	3.67497	2.5834	4.14175	0.47862	0.39719	4.19175	2.58302	2.5834			-12.05	3.361	1.64539e-18	-12.05	3.361	1.26905e-18	-12.05	3.361	5.14874e-19
					8338.81	0.89962	0.75329	0.95699			6.8	7.23254	6.31308	6.8	0.52268	0.54267	6.8	4.90987	3.94944			4.17243	3.55624	2.64349	4.17243	0.46781	0.39996	4.22243	2.6405	2.64349			-12.05	3.38589	9.75043e-19	-12.05	3.38589	7.46519e-19	-12.05	3.38589	3.05157e-19
					8339.06	0.90243	0.7611	0.95117			6.85	4.79333	4.11576	6.85	0.62824	0.66978	6.85	2.29774	1.6863			4.20311	3.41284	2.70315	4.20311	0.44514	0.39289	4.25311	2.69765	2.70315			-12.05	3.41079	5.75794e-19	-12.05	3.41079	4.37823e-19	-12.05	3.41079	1.8021e-19
					8339.31	0.90307	0.76666	0.9435			6.9	1.91953	1.58124	6.9	0.73885	0.7954	6.9	-0.72024	-0.84762			4.23379	3.249	2.76238	4.23379	0.4121	0.37519	4.28379	2.7546	2.76238			-12.05	3.43568	3.38845e-19	-12.05	3.43568	2.56003e-19	-12.05	3.43568	1.06039e-19
					8339.57	0.90599	0.77375	0.93359			6.95	-1.15081	-1.09344	6.95	0.85781	0.9206	6.95	-3.75689	-3.34974			4.26447	3.06956	2.82109	4.26447	0.37052	0.34745	4.31447	2.81142	2.82109			-12.05	3.46058	1.98714e-19	-12.05	3.46058	1.49235e-19	-12.05	3.46058	6.2172e-20
					8339.82	0.90682	0.78023	0.9237			7	-4.15073	-3.69181	7	0.98396	1.04303	7	-6.40197	-5.5077			4.29515	2.87976	2.87912	4.29515	0.32243	0.3138	4.34515	2.86805	2.87912			-12.05	3.48548	1.16131e-19	-12.05	3.48548	8.67297e-20	-12.05	3.48548	3.63215e-20
					8340.07	0.90895	0.78628	0.91328			7.05	-6.81518	-6.00157	7.05	1.11119	1.15669	7.05	-8.29335	-7.05328			4.32583	2.68496	2.93614	4.32583	0.27006	0.27887	4.37583	2.92426	2.93614			-12.05	3.51037	6.76332e-20	-12.05	3.51037	5.02488e-20	-12.05	3.51037	2.11435e-20
					8340.32	0.91049	0.79042	0.90509			7.1	-8.91271	-7.83843	7.1	1.22763	1.25171	7.1	-9.18245	-7.80907			4.35651	2.49038	2.99169	4.35651	0.21587	0.24522	4.40651	2.9797	2.99169			-12.05	3.53527	3.92525e-20	-12.05	3.53527	2.90224e-20	-12.05	3.53527	1.22641e-20
					8340.58	0.91262	0.79638	0.897			7.15	-10.2736	-9.07007	7.15	1.31848	1.31531	7.15	-8.96359	-7.7184			4.38719	2.30078	3.04515	4.38719	0.16275	0.21445	4.43719	3.03378	3.04515			-12.05	3.56017	2.27023e-20	-12.05	3.56017	1.67102e-20	-12.05	3.56017	7.08836e-21
					8340.83	0.91494	0.80134	0.89114			7.2	-10.7979	-9.62815	7.2	1.36653	1.33311	7.2	-7.72797	-6.85535			4.41786	2.12021	3.09572	4.41786	0.11481	0.18766	4.46786	3.08574	3.09572			-12.05	3.58506	1.30848e-20	-12.05	3.58506	9.59094e-21	-12.05	3.58506	4.08233e-21
					8341.08	0.91656	0.80348	0.88861			7.25	-10.4877	-9.51391	7.25	1.35425	1.29053	7.25	-5.74197	-5.41048			4.44854	1.95172	3.14246	4.44854	0.07993	0.16548	4.49854	3.13464	3.14246			-12.05	3.60996	7.51557e-21	-12.05	3.60996	5.48731e-21	-12.05	3.60996	2.34275e-21
					8341.33	0.91775	0.8121	0.88891			7.3	-9.4427	-8.79562	7.3	1.26591	1.17495	7.3	-3.38522	-3.6548			4.47922	1.79721	3.18432	4.47922	0.07156	0.14819	4.52922	3.17934	3.18432			-12.05	3.63485	4.30182e-21	-12.05	3.63485	3.12945e-21	-12.05	3.63485	1.33968e-21
					8341.59	0.92018	0.81573	0.89169			7.35	-7.83751	-7.59702	7.35	1.08983	0.97764	7.35	-1.08005	-1.89003			4.5099	1.65736	3.2201	4.5099	0.089	0.1357	4.5599	3.21858	3.2201			-12.05	3.65975	2.45379e-21	-12.05	3.65975	1.779e-21	-12.05	3.65975	7.63374e-22
					8341.84	0.92279	0.82464	0.89763			7.4	-5.89534	-6.07848	7.4	0.8203	0.69551	7.4	0.78971	-0.39122			4.54058	1.53177	3.24856	4.54058	0.11461	0.12765	4.59058	3.25096	3.24856			-12.05	3.68465	1.39483e-21	-12.05	3.68465	1.00803e-21	-12.05	3.68465	4.33447e-22
					8342.09	0.92425	0.82727	0.90474			7.45	-3.85504	-4.41373	7.45	0.45916	0.33246	7.45	1.95184	0.64381			4.57126	1.41914	3.26846	4.57126	0.13838	0.1235	4.62126	3.27505	3.26846			-12.05	3.70954	7.90131e-22	-12.05	3.70954	5.6932e-22	-12.05	3.70954	2.45245e-22
					8342.34	0.92524	0.83281	0.91323			7.5	-1.9368	-2.76569	7.5	0.01675	-0.09982	7.5	2.29603	1.1289			4.60194	1.31774	3.27854	4.60194	0.15689	0.12259	4.65194	3.28941	3.27854			-12.05	3.73444	4.4604e-22	-12.05	3.73444	3.20488e-22	-12.05	3.73444	1.38271e-22
					8342.6	0.9298	0.84008	0.92189			7.55	-0.31177	-1.26528	7.55	-0.48805	-0.58185	7.55	1.89105	1.10363			4.63262	1.22578	3.27768	4.63262	0.169	0.12421	4.68262	3.29267	3.27768			-12.05	3.75934	2.50925e-22	-12.05	3.75934	1.79817e-22	-12.05	3.75934	7.76843e-23
					8342.85	0.93137	0.84433	0.9311			7.6	0.91977	0.00386	7.6	-1.0288	-1.08697	7.6	0.96516	0.71854			4.6633	1.14182	3.26485	4.6633	0.17458	0.12761	4.7133	3.2836	3.26485			-12.05	3.78423	1.40673e-22	-12.05	3.78423	1.00557e-22	-12.05	3.78423	4.34917e-23
					8343.1	0.93491	0.85306	0.94174			7.65	1.73838	1.01374	7.65	-1.56881	-1.58281	7.65	-0.14873	0.19766			4.69398	1.06496	3.23925	4.69398	0.17406	0.13194	4.74398	3.26116	3.23925			-12.05	3.80913	7.85909e-23	-12.05	3.80913	5.60456e-23	-12.05	3.80913	2.42635e-23
					8343.35	0.93734	0.85849	0.95002			7.7	2.20046	1.78922	7.7	-2.06883	-2.03364	7.7	-1.07104	-0.21247			4.72466	0.99497	3.2003	4.72466	0.16824	0.13631	4.77466	3.22459	3.2003			-12.05	3.83403	4.37551e-23	-12.05	3.83403	3.11328e-23	-12.05	3.83403	1.34889e-23
					8343.61	0.94017	0.86387	0.95782			7.75	2.42555	2.39619	7.75	-2.48793	-2.40209	7.75	-1.47979	-0.29802			4.75534	0.93217	3.1477	4.75534	0.15824	0.13973	4.80534	3.17343	3.1477			-12.05	3.85892	2.42761e-23	-12.05	3.85892	1.72359e-23	-12.05	3.85892	7.47267e-24
					8343.86	0.94349	0.87362	0.9633			7.8	2.56941	2.92378	7.8	-2.78677	-2.65277	7.8	-1.17491	0.07522			4.78602	0.87715	3.08146	4.78602	0.14546	0.14127	4.83602	3.10756	3.08146			-12.05	3.88382	1.34222e-23	-12.05	3.88382	9.51008e-24	-12.05	3.88382	4.12529e-24
					8344.11	0.94583	0.87865	0.96624			7.85	2.78923	3.46217	7.85	-2.93111	-2.75547	7.85	-0.12185	0.93035			4.8167	0.83044	3.00194	4.8167	0.13152	0.14012	4.8667	3.02728	3.00194			-12.05	3.90871	7.39538e-24	-12.05	3.90871	5.22954e-24	-12.05	3.90871	2.26942e-24
					8344.36	0.94915	0.8861	0.96659			7.9	3.2108	4.08037	7.9	-2.89518	-2.68829	7.9	1.53994	2.17227			4.84738	0.79215	2.9098	4.84738	0.11822	0.13604	4.89738	2.93325	2.9098			-12.05	3.93361	4.0606e-24	-12.05	3.93361	2.86595e-24	-12.05	3.93361	1.2441e-24
					8344.62	0.95113	0.89394	0.96518			7.95	3.90117	4.80812	7.95	-2.66469	-2.44029	7.95	3.52548	3.60611			4.87806	0.76166	2.80604	4.87806	0.10741	0.12995	4.92806	2.82652	2.80604			-12.05	3.95851	2.22183e-24	-12.05	3.95851	1.56528e-24	-12.05	3.95851	6.79642e-25
					8344.87	0.95219	0.90067	0.96362			8	4.85155	5.62511	8	-2.23909	-2.01348	8	5.46328	4.97656			4.90874	0.73763	2.69195	4.90874	0.10051	0.12332	4.95874	2.70849	2.69195			-12.05	3.9834	1.2115e-24	-12.05	3.9834	8.51993e-25	-12.05	3.9834	3.6999e-25
					8345.12	0.95398	0.90677	0.96248			8.05	5.97354	6.4593	8.05	-1.63186	-1.42394	8.05	6.9723	6.01931			4.93942	0.71811	2.56908	4.93942	0.09801	0.11693	4.98942	2.58089	2.56908			-12.05	4.0083	6.58302e-25	-12.05	4.0083	4.6216e-25	-12.05	4.0083	2.00717e-25
					8345.37	0.95636	0.91346	0.96336			8.1	7.10958	7.19513	8.1	-0.8675	-0.70141	8.1	7.7399	6.51608			4.9701	0.7009	2.43918	4.9701	0.09914	0.11112	5.0201	2.44568	2.43918			-12.05	4.0332	3.56465e-25	-12.05	4.0332	2.49839e-25	-12.05	4.0332	1.08509e-25
					8345.63	0.95914	0.92016	0.96732			8.15	8.0567	7.6903	8.15	0.0051	0.11195	8.15	7.57591	6.33779			5.00078	0.68392	2.30413	5.00078	0.10227	0.10602	5.05078	2.30505	2.30413			-12.05	4.05809	1.92352e-25	-12.05	4.05809	1.34597e-25	-12.05	4.05809	5.84567e-26
					8345.88	0.95992	0.92534	0.97615			8.2	8.59281	7.79902	8.2	0.92945	0.96409	8.2	6.46696	5.4693			5.03146	0.66555	2.16588	5.03146	0.10571	0.10168	5.08146	2.16124	2.16588			-12.05	4.08299	1.03434e-25	-12.05	4.08299	7.22631e-26	-12.05	4.08299	3.13828e-26
					8346.13	0.96156	0.93253	0.99008			8.25	8.51996	7.39818	8.25	1.84117	1.79637	8.25	4.57295	4.01071			5.06214	0.64476	2.02638	5.06214	0.10811	0.0981	5.11214	2.01654	2.02638			-12.05	4.10788	5.54266e-26	-12.05	4.10788	3.86635e-26	-12.05	4.10788	1.67895e-26
					8346.38	0.96288	0.93797	1.00902			8.3	7.70397	6.41087	8.3	2.67275	2.54792	8.3	2.18795	2.15568			5.09282	0.62127	1.88751	5.09282	0.10865	0.09522	5.14282	1.87317	1.88751			-12.05	4.13278	2.95978e-26	-12.05	4.13278	2.06152e-26	-12.05	4.13278	8.95102e-27
					8346.64	0.96337	0.94293	1.02615			8.35	6.09964	4.82501	8.35	3.35897	3.16048	8.35	-0.32254	0.15221			5.1235	0.59542	1.75104	5.1235	0.10697	0.09294	5.1735	1.73316	1.75104			-12.05	4.15768	1.57501e-26	-12.05	4.15768	1.0954e-26	-12.05	4.15768	4.75552e-27
					8346.89	0.96552	0.94731	1.04272			8.4	3.7661	2.70345	8.4	3.84236	3.58323	8.4	-2.59662	-1.74589			5.15418	0.56816	1.61854	5.15418	0.10309	0.09109	5.20418	1.59832	1.61854			-12.05	4.18257	8.35207e-27	-12.05	4.18257	5.80035e-27	-12.05	4.18257	2.51775e-27
					8347.14	0.96767	0.95156	1.05572			8.45	0.86651	0.18267	8.45	4.07845	3.77739	8.45	-4.34655	-3.3257			5.18486	0.54082	1.49141	5.18486	0.09735	0.08947	5.23486	1.47015	1.49141			-12.05	4.20747	4.41354e-27	-12.05	4.20747	3.06079e-27	-12.05	4.20747	1.32837e-27
					8347.39	0.96919	0.95631	1.06709			8.5	-2.34822	-2.5396	8.5	4.04006	3.72005	8.5	-5.40982	-4.4503			5.21553	0.51488	1.37082	5.21553	0.09036	0.08788	5.26553	1.3498	1.37082			-12.05	4.23236	2.32415e-27	-12.05	4.23236	1.60956e-27	-12.05	4.23236	6.98419e-28
					8347.65	0.9699	0.95969	1.0743			8.55	-5.56961	-5.22628	8.55	3.7201	3.40737	8.55	-5.77032	-5.07675			5.24621	0.49172	1.25769	5.24621	0.08297	0.08615	5.29621	1.23802	1.25769			-12.05	4.25726	1.21961e-27	-12.05	4.25726	8.43479e-28	-12.05	4.25726	3.65935e-28
					8347.9	0.97129	0.96144	1.07899			8.6	-8.47143	-7.62939	8.6	3.13208	2.8548	8.6	-5.54589	-5.25116			5.27689	0.4723	1.15272	5.27689	0.07616	0.08418	5.32689	1.13524	1.15272			-12.05	4.28216	6.37764e-28	-12.05	4.28216	4.40487e-28	-12.05	4.28216	1.91066e-28
					8348.15	0.97284	0.96494	1.08227			8.65	-10.7556	-9.52154	8.65	2.31309	2.09681	8.65	-4.94701	-5.08488			5.30757	0.45696	1.05637	5.30757	0.07094	0.082	5.35757	1.04153	1.05637			-12.05	4.30705	3.32338e-28	-12.05	4.30705	2.29236e-28	-12.05	4.30705	9.94156e-29
					8348.4	0.97295	0.96562	1.08377			8.7	-12.183	-10.7249	8.7	1.31918	1.18468	8.7	-4.2211	-4.7187			5.33825	0.44532	0.96888	5.33825	0.06805	0.07969	5.38825	0.95674	0.96888			-12.05	4.33195	1.72575e-28	-12.05	4.33195	1.18884e-28	-12.05	4.33195	5.15486e-29
					8348.66	0.97448	0.96845	1.08327			8.75	-12.6112	-11.1337	8.75	0.22158	0.18271	8.75	-3.58406	-4.28398			5.36893	0.43641	0.89026	5.36893	0.06763	0.07737	5.41893	0.88054	0.89026			-12.05	4.35685	8.9301e-29	-12.05	4.35685	6.14401e-29	-12.05	4.35685	2.66361e-29
					8348.91	0.97437	0.96871	1.08078			8.8	-12.0182	-10.7259	8.8	-0.89881	-0.83659	8.8	-3.16884	-3.8701			5.39961	0.42892	0.82032	5.39961	0.06917	0.07515	5.44961	0.81249	0.82032			-12.05	4.38174	4.60482e-29	-12.05	4.38174	3.16424e-29	-12.05	4.38174	1.37156e-29
					8349.16	0.97565	0.97007	1.07615			8.85	-10.4987	-9.56464	8.85	-1.95805	-1.7983	8.85	-2.99718	-3.50521			5.43029	0.42149	0.75868	5.43029	0.07171	0.07306	5.48029	0.75217	0.75868			-12.05	4.40664	2.36617e-29	-12.05	4.40664	1.62395e-29	-12.05	4.40664	7.03806e-30
					8349.41	0.97484	0.97127	1.06775			8.9	-8.24889	-7.78787	8.9	-2.87616	-2.63133	8.9	-2.98149	-3.15577			5.46097	0.41299	0.70481	5.46097	0.07428	0.07113	5.51097	0.69915	0.70481			-12.05	4.43154	1.21159e-29	-12.05	4.43154	8.30546e-30	-12.05	4.43154	3.59899e-30
					8349.67	0.97413	0.97315	1.05643			8.95	-5.53581	-5.58775	8.95	-3.58393	-3.27429	8.95	-2.95538	-2.74343			5.49165	0.40267	0.65807	5.49165	0.07608	0.06936	5.54165	0.65303	0.65807			-12.05	4.45643	6.18221e-30	-12.05	4.45643	4.23292e-30	-12.05	4.45643	1.83401e-30
					8349.92	0.97108	0.97227	1.04343			9	-2.6586	-3.18385	9	-4.02894	-3.68083	9	-2.72481	-2.17431			5.52233	0.39026	0.61771	5.52233	0.07661	0.06774	5.57233	0.61339	0.61771			-12.05	4.48133	3.14345e-30	-12.05	4.48133	2.14981e-30	-12.05	4.48133	9.31346e-31
					8350.17	0.97131	0.97349	1.02746			9.05	0.09383	-0.79383	9.05	-4.18029	-3.82371	9.05	-2.12666	-1.37312			5.55301	0.37594	0.58296	5.55301	0.07562	0.06625	5.60301	0.57974	0.58296			-12.05	4.50622	1.59274e-30	-12.05	4.50622	1.08804e-30	-12.05	4.50622	4.71316e-31
					8350.42	0.97092	0.97338	1.0075			9.1	2.48134	1.39332	9.1	-4.03055	-3.69703	9.1	-1.07884	-0.31335			5.58369	0.36029	0.55302	5.58369	0.07309	0.06484	5.63369	0.55145	0.55302			-12.05	4.53112	8.04187e-31	-12.05	4.53112	5.48751e-31	-12.05	4.53112	2.37687e-31
					8350.68	0.97034	0.97195	0.98778			9.15	4.34406	3.23885	9.15	-3.59654	-3.3167	9.15	0.38964	0.9651			5.61437	0.34417	0.52711	5.61437	0.06919	0.06342	5.66437	0.52775	0.52711			-12.05	4.55602	4.04617e-31	-12.05	4.55602	2.75796e-31	-12.05	4.55602	1.1945e-31
					8350.93	0.97054	0.97216	0.96798			9.2	5.61037	4.66626	9.2	-2.91932	-2.71897	9.2	2.12743	2.35541			5.64505	0.32854	0.50452	5.64505	0.06429	0.06194	5.69505	0.50775	0.50452			-12.05	4.58091	2.02864e-31	-12.05	4.58091	1.38128e-31	-12.05	4.58091	5.9822e-32
					8351.18	0.97015	0.97175	0.94954			9.25	6.30167	5.66196	9.25	-2.05947	-1.95675	9.25	3.89556	3.70107			5.67573	0.31434	0.48459	5.67573	0.05889	0.06034	5.72573	0.49047	0.48459			-12.05	4.60581	1.01353e-31	-12.05	4.60581	6.89381e-32	-12.05	4.60581	2.98555e-32
					8351.43	0.97014	0.9708	0.92985			9.3	6.51845	6.2668	9.3	-1.0915	-1.09511	9.3	5.41663	4.82687			5.70641	0.30225	0.46676	5.70641	0.05365	0.0586	5.75641	0.47495	0.46676			-12.05	4.6307	5.04598e-32	-12.05	4.6307	3.42861e-32	-12.05	4.6307	1.48483e-32
					8351.69	0.9702	0.96968	0.91388			9.35	6.411	6.55868	9.35	-0.09699	-0.20525	9.35	6.43712	5.57636			5.73709	0.29255	0.45054	5.73709	0.04929	0.05679	5.78709	0.46034	0.45054			-12.05	4.6556	2.50337e-32	-12.05	4.6556	1.69925e-32	-12.05	4.6556	7.35903e-33
					8351.94	0.97047	0.96983	0.90233			9.4	6.14494	6.63053	9.4	0.84288	0.64184	9.4	6.78608	5.84689			5.76777	0.28509	0.43554	5.76777	0.04644	0.05497	5.81777	0.44598	0.43554			-12.05	4.6805	1.23759e-32	-12.05	4.6805	8.39225e-33	-12.05	4.6805	3.63457e-33
					8352.19	0.96952	0.96842	0.89484			9.45	5.8662	6.56768	9.45	1.65474	1.38186	9.45	6.41592	5.61338			5.79845	0.27931	0.42144	5.79845	0.04541	0.05323	5.84845	0.43143	0.42144			-12.05	4.70539	6.09676e-33	-12.05	4.70539	4.13028e-33	-12.05	4.70539	1.78885e-33
					8352.44	0.97044	0.967	0.89335			9.5	5.67167	6.42886	9.5	2.27964	1.96277	9.5	5.41497	4.93501			5.82913	0.27442	0.40799	5.82913	0.04602	0.05161	5.87913	0.4165	0.40799			-12.05	4.73029	2.99291e-33	-12.05	4.73029	2.02563e-33	-12.05	4.73029	8.77375e-34
					8352.7	0.9711	0.9681	0.89736			9.55	5.59065	6.23412	9.55	2.67901	2.34934	9.55	3.98847	3.94267			5.85981	0.2696	0.39502	5.85981	0.04767	0.05014	5.90981	0.40124	0.39502			-12.05	4.75519	1.46406e-33	-12.05	4.75519	9.89967e-34	-12.05	4.75519	4.28829e-34
					8352.95	0.9717	0.96589	0.90558			9.6	5.58033	5.96207	9.6	2.83715	2.52593	9.6	2.41163	2.80894			5.89049	0.26416	0.3824	5.89049	0.04964	0.04879	5.94049	0.38587	0.3824			-12.05	4.78008	7.1367e-34	-12.05	4.78008	4.82126e-34	-12.05	4.78008	2.08868e-34
					8353.2	0.97342	0.96548	0.91578			9.65	5.53969	5.55615	9.65	2.75868	2.49727	9.65	0.96631	1.70887			5.92117	0.25762	0.37008	5.92117	0.05129	0.04754	5.97117	0.37074	0.37008			-12.05	4.80498	3.46661e-34	-12.05	4.80498	2.33981e-34	-12.05	4.80498	1.01379e-34
					8353.45	0.97404	0.96444	0.92971			9.7	5.32205	4.93946	9.7	2.47245	2.28709	9.7	-0.12294	0.78027			5.95185	0.24984	0.35804	5.95185	0.05218	0.04638	6.00185	0.35626	0.35804			-12.05	4.82988	1.67797e-34	-12.05	4.82988	1.13156e-34	-12.05	4.82988	4.90356e-35
					8353.71	0.97552	0.96608	0.94245			9.75	4.77475	4.03684	9.75	2.02603	1.9349	9.75	-0.74222	0.09378			5.98253	0.24094	0.34629	5.98253	0.05205	0.04529	6.03253	0.34278	0.34629			-12.05	4.85477	8.09341e-35	-12.05	4.85477	5.45323e-35	-12.05	4.85477	2.36354e-35
					8353.96	0.97686	0.96568	0.9557			9.8	3.77459	2.79356	9.8	1.48016	1.4914	9.8	-0.9134	-0.3608			6.0132	0.23126	0.33488	6.0132	0.0508	0.04423	6.0632	0.33056	0.33488			-12.05	4.87967	3.89001e-35	-12.05	4.87967	2.61884e-35	-12.05	4.87967	1.13527e-35
					8354.21	0.97726	0.96633	0.96817			9.85	2.25872	1.19688	9.85	0.90192	1.01273	9.85	-0.78558	-0.6685			6.04388	0.22133	0.32387	6.04388	0.04848	0.04316	6.09388	0.3197	0.32387			-12.05	4.90456	1.86311e-35	-12.05	4.90456	1.25326e-35	-12.05	4.90456	5.43407e-36
					8354.46	0.97623	0.9651	0.97932			9.9	0.24738	-0.70972	9.9	0.35735	0.55415	9.9	-0.59426	-0.96176			6.07456	0.21174	0.31331	6.07456	0.04528	0.04203	6.12456	0.31013	0.31331			-12.05	4.92946	8.89195e-36	-12.05	4.92946	5.97657e-36	-12.05	4.92946	2.59201e-36
					8354.72	0.9767	0.96561	0.98734			9.95	-2.14711	-2.82211	9.95	-0.09588	0.16396	9.95	-0.59745	-1.38016			6.10524	0.203	0.30325	6.10524	0.04149	0.0408	6.15524	0.30161	0.30325			-12.05	4.95436	4.22888e-36	-12.05	4.95436	2.84014e-36	-12.05	4.95436	1.23207e-36
					8354.97	0.97645	0.96697	0.99323			10	-4.72741	-4.98171	10	-0.41468	-0.12169	10	-1.00365	-2.02617			6.13592	0.19548	0.29371	6.13592	0.0375	0.03947	6.18592	0.29383	0.29371			-12.05	4.97925	2.00412e-36	-12.05	4.97925	1.34495e-36	-12.05	4.97925	5.83603e-37
					8355.22	0.9765	0.96763	0.99719			10.05	-7.23361	-6.99198	10.05	-0.57574	-0.28259	10.05	-1.90925	-2.92809			6.1666	0.1893	0.28469	6.1666	0.03378	0.03805	6.2166	0.28642	0.28469			-12.05	5.00415	9.46433e-37	-12.05	5.00415	6.34671e-37	-12.05	5.00415	2.75477e-37
					8355.47	0.97483	0.97036	0.99893			10.1	-9.37811	-8.64264	10.1	-0.57692	-0.31691	10.1	-3.26647	-4.01962			6.19728	0.18431	0.27618	6.19728	0.03085	0.03663	6.24728	0.27908	0.27618			-12.05	5.02905	4.45376e-37	-12.05	5.02905	2.98448e-37	-12.05	5.02905	1.29581e-37
					8355.73	0.97357	0.97126	0.99907			10.15	-10.9085	-9.73935	10.15	-0.43612	-0.24095	10.15	-4.87611	-5.14256			6.22796	0.18016	0.26813	6.22796	0.02915	0.03527	6.27796	0.27157	0.26813			-12.05	5.05394	2.08849e-37	-12.05	5.05394	1.39851e-37	-12.05	5.05394	6.07406e-38
					8355.98	0.97415	0.97197	0.99812			10.2	-11.5871	-10.1327	10.2	-0.19202	-0.087	10.2	-6.40881	-6.07359			6.25864	0.17636	0.26049	6.25864	0.02879	0.03403	6.30864	0.26379	0.26049			-12.05	5.07884	9.75905e-38	-12.05	5.07884	6.53039e-38	-12.05	5.07884	2.83728e-38
					8356.23	0.9742	0.97196	0.99636			10.25	-11.2794	-9.74271	10.25	0.10166	0.10077	10.25	-7.48793	-6.57027			6.28932	0.17246	0.25321	6.28932	0.02955	0.03295	6.33932	0.25577	0.25321			-12.05	5.10373	4.54414e-38	-12.05	5.10373	3.03871e-38	-12.05	5.10373	1.32072e-38
					8356.48	0.97471	0.97328	0.9949			10.3	-9.96993	-8.5738	10.3	0.38281	0.27193	10.3	-7.77053	-6.4267			6.32	0.16806	0.24623	6.32	0.03093	0.03205	6.37	0.24761	0.24623			-12.05	5.12863	2.10846e-38	-12.05	5.12863	1.40902e-38	-12.05	5.12863	6.12633e-39
					8356.74	0.97593	0.97401	0.99305			10.35	-7.76717	-6.71904	10.35	0.58864	0.37635	10.35	-7.03194	-5.52639			6.35068	0.16296	0.23949	6.35068	0.0324	0.0313	6.40068	0.23954	0.23949			-12.05	5.15353	9.74873e-39	-12.05	5.15353	6.51056e-39	-12.05	5.15353	2.83188e-39
					8356.99	0.97658	0.97569	0.9913			10.4	-4.89266	-4.35104	10.4	0.66384	0.37092	10.4	-5.22971	-3.88002			6.38136	0.1571	0.23298	6.38136	0.03357	0.03068	6.43136	0.23176	0.23298			-12.05	5.17842	4.49159e-39	-12.05	5.17842	2.99776e-39	-12.05	5.17842	1.30446e-39
					8357.24	0.97618	0.97783	0.98792			10.45	-1.65323	-1.70164	10.45	0.56811	0.22571	10.45	-2.53097	-1.6384			6.41204	0.15061	0.22666	6.41204	0.03417	0.03015	6.46204	0.22451	0.22666			-12.05	5.20332	2.06215e-39	-12.05	5.20332	1.37547e-39	-12.05	5.20332	5.98786e-40
					8357.49	0.97541	0.97667	0.98471			10.5	1.59997	0.96741	10.5	0.28231	-0.07117	10.5	0.70488	0.92316			6.44272	0.14374	0.22055	6.44272	0.03407	0.02967	6.49272	0.21792	0.22055			-12.05	5.22822	9.43433e-40	-12.05	5.22822	6.28901e-40	-12.05	5.22822	2.73901e-40
					8357.75	0.97508	0.97774	0.98124			10.55	4.51942	3.39806	10.55	-0.18762	-0.51058	10.55	3.98647	3.44819			6.4734	0.13682	0.21465	6.4734	0.03325	0.02921	6.5234	0.21207	0.21465			-12.05	5.25311	4.30101e-40	-12.05	5.25311	2.86542e-40	-12.05	5.25311	1.24852e-40
					8358	0.97372	0.97735	0.979			10.6	6.80884	5.36678	10.6	-0.8095	-1.06152	10.6	6.78262	5.5639			6.50408	0.13023	0.20897	6.50408	0.03177	0.02869	6.55408	0.2069	0.20897			-12.05	5.27801	1.95388e-40	-12.05	5.27801	1.30098e-40	-12.05	5.27801	5.67129e-41
					8358.25	0.97328	0.97629	0.98008			10.65	8.2631	6.71576	10.65	-1.52673	-1.6732	10.65	8.62745	6.95168			6.53476	0.12426	0.20351	6.53476	0.02977	0.02807	6.58476	0.20229	0.20351			-12.05	5.30291	8.84498e-41	-12.05	5.30291	5.88609e-41	-12.05	5.30291	2.56713e-41
					8358.5	0.97354	0.97689	0.9845			10.7	8.79429	7.37083	10.7	-2.2631	-2.27971	10.7	9.21613	7.41025			6.56544	0.11913	0.19828	6.56544	0.02746	0.02732	6.61544	0.19805	0.19828			-12.05	5.3278	3.98991e-41	-12.05	5.3278	2.65374e-41	-12.05	5.3278	1.15796e-41
					8358.76	0.97218	0.97456	0.99191			10.75	8.43994	7.34731	10.75	-2.93018	-2.80578	10.75	8.47048	6.89788			6.59612	0.11489	0.19324	6.59612	0.02507	0.02642	6.64612	0.19398	0.19324			-12.05	5.3527	1.79349e-41	-12.05	5.3527	1.19225e-41	-12.05	5.3527	5.20502e-42
					8359.01	0.97355	0.97358	1.00316			10.8	7.35228	6.74226	10.8	-3.4366	-3.17472	10.8	6.55941	5.54204			6.6268	0.11145	0.18835	6.6268	0.02288	0.02541	6.6768	0.18989	0.18835			-12.05	5.37759	8.03351e-42	-12.05	5.37759	5.33763e-42	-12.05	5.37759	2.33147e-42
					8359.26	0.97522	0.97514	1.01423			10.85	5.77035	5.71626	10.85	-3.69833	-3.31718	10.85	3.86876	3.61785			6.65748	0.1086	0.18359	6.65748	0.02114	0.02432	6.70748	0.18562	0.18359			-12.05	5.40249	3.58575e-42	-12.05	5.40249	2.38125e-42	-12.05	5.40249	1.04068e-42
					8359.51	0.97593	0.97256	1.02513			10.9	3.97962	4.46579	10.9	-3.6489	-3.17985	10.9	0.92584	1.49621			6.68816	0.10609	0.17889	6.68816	0.02004	0.02323	6.73816	0.18108	0.17889			-12.05	5.42739	1.59486e-42	-12.05	5.42739	1.05861e-42	-12.05	5.42739	4.62894e-43
					8359.77	0.97696	0.97175	1.03493			10.95	2.26561	3.19118	10.95	-3.24833	-2.73305	10.95	-1.70617	-0.42897			6.71884	0.10366	0.1742	6.71884	0.01959	0.02218	6.76884	0.17626	0.1742			-12.05	5.45228	7.06866e-43	-12.05	5.45228	4.68967e-43	-12.05	5.45228	2.05175e-43
					8360.02	0.97761	0.97175	1.04239			11	0.86899	2.06526	11	-2.48994	-1.97636	11	-3.54211	-1.81884			6.74952	0.10115	0.1695	6.74952	0.01967	0.0212	6.79952	0.17119	0.1695			-12.05	5.47718	3.12191e-43	-12.05	5.47718	2.07024e-43	-12.05	5.47718	9.06249e-44
					8360.27	0.97775	0.97117	1.04798			11.05	-0.05067	1.20777	11.05	-1.40246	-0.94154	11.05	-4.2732	-2.45702			6.7802	0.09844	0.16476	6.7802	0.02002	0.02032	6.8302	0.16592	0.16476			-12.05	5.50207	1.37395e-43	-12.05	5.50207	9.10701e-44	-12.05	5.50207	3.98885e-44
					8360.52	0.97766	0.97113	1.05194			11.1	-0.43702	0.66948	11.1	-0.04563	0.30772	11.1	-3.83303	-2.29192			6.81087	0.09552	0.15999	6.81087	0.02039	0.01954	6.86087	0.16058	0.15999			-12.05	5.52697	6.02552e-44	-12.05	5.52697	3.99212e-44	-12.05	5.52697	1.74955e-44
					8360.78	0.97668	0.97077	1.05458			11.15	-0.34275	0.42845	11.15	1.48097	1.67952	11.15	-2.38903	-1.4452			6.84155	0.09242	0.15523	6.84155	0.02057	0.01886	6.89155	0.15526	0.15523			-12.05	5.55187	2.63321e-44	-12.05	5.55187	1.74383e-44	-12.05	5.55187	7.64682e-45
					8361.03	0.97566	0.9719	1.05516			11.2	0.09476	0.39882	11.2	3.0504	3.06057	11.2	-0.32681	-0.18425			6.87223	0.08923	0.15052	6.87223	0.02045	0.01826	6.92223	0.15008	0.15052			-12.05	5.57676	1.14669e-44	-12.05	5.57676	7.59068e-45	-12.05	5.57676	3.33052e-45
					8361.28	0.97481	0.96942	1.05338			11.25	0.66646	0.45054	11.25	4.51954	4.32582	11.25	1.82987	1.13565			6.90291	0.08601	0.14592	6.90291	0.01996	0.01773	6.95291	0.14511	0.14592			-12.05	5.60166	4.97596e-45	-12.05	5.60166	3.29252e-45	-12.05	5.60166	1.44551e-45
					8361.53	0.97475	0.97021	1.04888			11.3	1.13675	0.43649	11.3	5.74238	5.34992	11.3	3.53657	2.14749			6.93359	0.08281	0.14151	6.93359	0.01912	0.01725	6.98359	0.14043	0.14151			-12.05	5.62656	2.15168e-45	-12.05	5.62656	1.42315e-45	-12.05	5.62656	6.2518e-46
					8361.78	0.9731	0.97083	1.04208			11.35	1.28817	0.22242	11.35	6.5844	6.01955	11.35	4.34516	2.55127			6.96427	0.07962	0.13733	6.96427	0.01799	0.01678	7.01427	0.13608	0.13733			-12.05	5.65145	9.27144e-46	-12.05	5.65145	6.12979e-46	-12.05	5.65145	2.69442e-46
					8362.04	0.97148	0.97028	1.03368			11.4	0.9631	-0.28533	11.4	6.93689	6.24536	11.4	4.00062	2.17863			6.99495	0.07641	0.13344	6.99495	0.01666	0.0163	7.04495	0.13211	0.13344			-12.05	5.67635	3.98095e-46	-12.05	5.67635	2.63096e-46	-12.05	5.67635	1.15718e-46
					8362.29	0.97083	0.97063	1.02387			11.45	0.09517	-1.11927	11.45	6.7294	5.97226	11.45	2.49707	1.03018			7.02563	0.07308	0.12986	7.02563	0.01528	0.01579	7.07563	0.12852	0.12986			-12.05	5.70125	1.70332e-46	-12.05	5.70125	1.12526e-46	-12.05	5.70125	4.95233e-47
					8362.54	0.97083	0.96962	1.0122			11.5	-1.27471	-2.2406	11.5	5.93933	5.18726	11.5	0.08139	-0.72297			7.05631	0.06956	0.12659	7.05631	0.01399	0.01525	7.10631	0.12532	0.12659			-12.05	5.72614	7.26232e-47	-12.05	5.72614	4.79587e-47	-12.05	5.72614	2.112e-47
					8362.79	0.97012	0.96963	1.00142			11.55	-3.00072	-3.54154	11.55	4.59713	3.92413	11.55	-2.79642	-2.77055			7.08699	0.06579	0.12362	7.08699	0.01296	0.01467	7.13699	0.1225	0.12362			-12.05	5.75104	3.08549e-47	-12.05	5.75104	2.03682e-47	-12.05	5.75104	8.97537e-48
					8363.05	0.97067	0.9681	0.99077			11.6	-4.85259	-4.85997	11.6	2.78669	2.26273	11.6	-5.57538	-4.72502			7.11767	0.06176	0.12091	7.11767	0.01227	0.01409	7.16767	0.12002	0.12091			-12.05	5.77593	1.3063e-47	-12.05	5.77593	8.62005e-48	-12.05	5.77593	3.80089e-48
					8363.3	0.96956	0.96816	0.9804			11.65	-6.55101	-6.00281	11.65	0.64034	0.32448	11.65	-7.69866	-6.20006			7.14835	0.05754	0.1184	7.14835	0.01197	0.01352	7.19835	0.11784	0.1184			-12.05	5.80083	5.51101e-48	-12.05	5.80083	3.63529e-48	-12.05	5.80083	1.60395e-48
					8363.55	0.96882	0.96785	0.97348			11.7	-7.81224	-6.77727	11.7	-1.67109	-1.73795	11.7	-8.7274	-6.8884			7.17903	0.05325	0.11602	7.17903	0.01198	0.01299	7.22903	0.11588	0.11602			-12.05	5.82573	2.3168e-48	-12.05	5.82573	1.52771e-48	-12.05	5.82573	6.74481e-49
					8363.8	0.96893	0.96761	0.96853			11.75	-8.3947	-6.59751	11.75	-3.95255	-3.75317	11.75	-8.42949	-6.54933			7.20971	0.04912	0.11373	7.20971	0.01216	0.0125	7.25971	0.11405	0.11373			-12.05	5.85062	9.70549e-49	-12.05	5.85062	6.39755e-49	-12.05	5.85062	2.82632e-49
					8364.06	0.96922	0.96807	0.9652			11.8	-8.14	-6.05678	11.8	-6.00211	-5.54509	11.8	-6.82521	-5.61518			7.24039	0.0454	0.11146	7.24039	0.01237	0.01204	7.29039	0.11225	0.11146			-12.05	5.87552	4.0515e-49	-12.05	5.87552	2.66967e-49	-12.05	5.87552	1.18017e-49
					8364.31	0.96984	0.96568	0.96364			11.85	-7.00153	-5.15508	11.85	-7.62981	-6.94916	11.85	-4.18078	-4.08595			7.27107	0.04236	0.10917	7.27107	0.01249	0.01162	7.32107	0.11036	0.10917			-12.05	5.90041	1.68532e-49	-12.05	5.90041	1.11013e-49	-12.05	5.90041	4.91069e-50
					8364.56	0.97034	0.96651	0.96387			11.9	-5.05609	-3.8924	11.9	-8.67616	-7.35266	11.9	-0.95232	-1.96163			7.30175	0.04019	0.10682	7.30175	0.01242	0.01121	7.35175	0.10829	0.10682			-12.05	5.92531	6.98587e-50	-12.05	5.92531	4.60003e-50	-12.05	5.92531	2.03615e-50
					8364.81	0.97262	0.96606	0.9653			11.95	-2.49627	-2.26875	11.95	-9.02854	-7.37513	11.95	2.30738	0.75776			7.33243	0.03892	0.10438	7.33243	0.01214	0.0108	7.38243	0.10598	0.10438			-12.05	5.95021	2.88555e-50	-12.05	5.95021	1.89941e-50	-12.05	5.95021	8.41299e-51
					8365.07	0.97334	0.96504	0.96692			12	0.39513	-0.28412	12	-8.63361	-7.01655	12	5.05894	4.07223			7.36311	0.03841	0.10187	7.36311	0.01163	0.01039	7.41311	0.10337	0.10187			-12.05	5.9751	1.1877e-50	-12.05	5.9751	7.81532e-51	-12.05	5.9751	3.46387e-51
					8365.32	0.97335	0.96238	0.96795			12.05	3.28478	2.06147	12.05	-7.50968	-6.27694	12.05	6.88029	7.98179			7.39379	0.03836	0.09927	7.39379	0.01092	0.00994	7.44379	0.10048	0.09927			-12.05	6	4.87138e-51	-12.05	6	3.20439e-51	-12.05	6	1.42116e-51
					8365.57	0.97567	0.96337	0.96893			12.1	5.84157	4.76804	12.1	-5.72948	-5.15629						7.42447	0.03845	0.09659	7.42447	0.01005	0.00946	7.47447	0.09736	0.09659			-12	0	0.01272	-12	0	0.02524	-12	0	0.00571
					8365.82	0.97474	0.96372	0.97026						12.15	-3.42449	-3.6546						7.45515	0.03836	0.09385	7.45515	0.00907	0.00893	7.50515	0.09407	0.09385			-12	0.0249	0.02815	-12	0.0249	0.0559	-12	0.0249	0.01261
					8366.08	0.97458	0.96228	0.97105						12.2	-0.78839	-1.77187						7.48583	0.03787	0.09107	7.48583	0.00806	0.00836	7.53583	0.09073	0.09107			-12	0.04979	0.0388	-12	0.04979	0.07732	-12	0.04979	0.01727
					8366.33	0.97395	0.96251	0.97191						12.25	1.94908	0.49189						7.51651	0.03686	0.08825	7.51651	0.0071	0.00776	7.56651	0.08744	0.08825			-12	0.07469	0.04563	-12	0.07469	0.09142	-12	0.07469	0.02011
					8366.58	0.97261	0.96328	0.97272														7.54719	0.03531	0.08543	7.54719	0.00625	0.00715	7.59719	0.08431	0.08543			-12	0.09959	0.04995	-12	0.09959	0.10084	-12	0.09959	0.02176
					8366.83	0.97218	0.96436	0.9738														7.57787	0.03329	0.0826	7.57787	0.00559	0.00657	7.62787	0.08142	0.0826			-12	0.12448	0.05241	-12	0.12448	0.10684	-12	0.12448	0.02261
					8367.09	0.97184	0.96393	0.97563														7.60854	0.03095	0.0798	7.60854	0.00514	0.00602	7.65854	0.07878	0.0798			-12	0.14938	0.0534	-12	0.14938	0.11019	-12	0.14938	0.02292
					8367.34	0.97234	0.96236	0.97807														7.63922	0.02849	0.07704	7.63922	0.00489	0.00552	7.68922	0.07639	0.07704			-12	0.17427	0.05315	-12	0.17427	0.11141	-12	0.17427	0.02288
					8367.59	0.97317	0.96302	0.98106														7.6699	0.02613	0.07435	7.6699	0.00478	0.00509	7.7199	0.07418	0.07435			-12	0.19917	0.05175	-12	0.19917	0.11081	-12	0.19917	0.02256
					8367.84	0.97288	0.96369	0.98467														7.70058	0.02408	0.07174	7.70058	0.00474	0.00472	7.75058	0.07208	0.07174			-12	0.22407	0.04926	-12	0.22407	0.10862	-12	0.22407	0.02194
					8368.1	0.97216	0.96342	0.98865														7.73126	0.02248	0.06924	7.73126	0.00469	0.00441	7.78126	0.06998	0.06924			-12	0.24896	0.04575	-12	0.24896	0.10508	-12	0.24896	0.021
					8368.35	0.97227	0.96331	0.99238														7.76194	0.02134	0.06687	7.76194	0.0046	0.00415	7.81194	0.06782	0.06687			-12	0.27386	0.04142	-12	0.27386	0.10052	-12	0.27386	0.01976
					8368.6	0.97331	0.96237	0.99564														7.79262	0.02057	0.06464	7.79262	0.00444	0.00394	7.84262	0.06556	0.06464			-12	0.29875	0.03656	-12	0.29875	0.09532	-12	0.29875	0.01826
					8368.85	0.97379	0.96185	0.99884														7.8233	0.01995	0.06255	7.8233	0.00421	0.00374	7.8733	0.0632	0.06255			-12	0.32365	0.03157	-12	0.32365	0.08984	-12	0.32365	0.01662
					8369.1	0.9749	0.96277	1.00166														7.85398	0.01926	0.06061	7.85398	0.00392	0.00356	7.90398	0.0608	0.06061			-12	0.34855	0.02681	-12	0.34855	0.08432	-12	0.34855	0.01497
					8369.36	0.97458	0.96148	1.00382														7.88466	0.01832	0.05881	7.88466	0.00359	0.00337	7.93466	0.05844	0.05881			-12	0.37344	0.02257	-12	0.37344	0.07899	-12	0.37344	0.0134
					8369.61	0.97455	0.96284	1.00591														7.91534	0.01704	0.05712	7.91534	0.00325	0.00316	7.96534	0.05623	0.05712			-12	0.39834	0.01892	-12	0.39834	0.07412	-12	0.39834	0.01196
					8369.86	0.97451	0.96321	1.00789														7.94602	0.01539	0.05553	7.94602	0.0029	0.00293	7.99602	0.05427	0.05553			-12	0.42324	0.01577	-12	0.42324	0.07026	-12	0.42324	0.01067
					8370.11	0.97525	0.96385	1.01022														7.9767	0.01344	0.05401	7.9767	0.00258	0.00268	8.0267	0.05264	0.05401			-12	0.44813	0.0129	-12	0.44813	0.06811	-12	0.44813	0.00958
					8370.37	0.97557	0.96239	1.01256														8.00738	0.01135	0.05256	8.00738	0.00228	0.00241	8.05738	0.05135	0.05256			-12	0.47303	0.01014	-12	0.47303	0.06827	-12	0.47303	0.00879
					8370.62	0.97612	0.96474	1.01524														8.03806	0.00939	0.05116	8.03806	0.00202	0.00214	8.08806	0.05037	0.05116			-12	0.49793	0.00746	-12	0.49793	0.07078	-12	0.49793	0.00845
					8370.87	0.9769	0.96452	1.01803														8.06874	0.00798	0.04979	8.06874	0.0018	0.00188	8.11874	0.0496	0.04979			-12	0.52282	0.00496	-12	0.52282	0.07491	-12	0.52282	0.0086
					8371.12	0.97725	0.96323	1.02139														8.09942	0.00752	0.04846	8.09942	0.0016	0.00164	8.14942	0.04892	0.04846			-12	0.54772	0.00306	-12	0.54772	0.07949	-12	0.54772	0.00915
					8371.38	0.97694	0.96368	1.02488														8.1301	0.00807	0.04716	8.1301	0.00143	0.00144	8.1801	0.04819	0.04716			-12	0.57261	0.00267	-12	0.57261	0.08337	-12	0.57261	0.00988
					8371.63	0.97772	0.966	1.0275														8.16078	0.00918	0.0459	8.16078	0.00127	0.00127	8.21078	0.04731	0.0459			-12	0.59751	0.00361	-12	0.59751	0.08563	-12	0.59751	0.01055
					8371.88	0.97671	0.96407	1.0292														8.19146	0.01036	0.04468	8.19146	0.00114	0.00115	8.24146	0.0462	0.04468			-12	0.62241	0.00469	-12	0.62241	0.08576	-12	0.62241	0.01101
					8372.13	0.97633	0.96544	1.0295														8.22214	0.01132	0.0435	8.22214	0.00102	0.00107	8.27214	0.04483	0.0435			-12	0.6473	0.00544	-12	0.6473	0.0836	-12	0.6473	0.01116
					8372.39	0.9747	0.96704	1.0285														8.25282	0.01189	0.04236	8.25282	0.000949592	0.00104	8.30282	0.04324	0.04236			-12	0.6722	0.00582	-12	0.6722	0.07931	-12	0.6722	0.01097
					8372.64	0.97473	0.96779	1.02601														8.2835	0.01203	0.04124	8.2835	0.000920057	0.00104	8.3335	0.0415	0.04124			-12	0.6971	0.00585	-12	0.6971	0.07325	-12	0.6971	0.01048
					8372.89	0.97448	0.96599	1.02248														8.31418	0.0118	0.04014	8.31418	0.000941807	0.00108	8.36418	0.03972	0.04014			-12	0.72199	0.00562	-12	0.72199	0.06593	-12	0.72199	0.00974
					8373.14	0.97512	0.96844	1.01891														8.34486	0.01134	0.03906	8.34486	0.00101	0.00116	8.39486	0.03802	0.03906			-12	0.74689	0.00522	-12	0.74689	0.05789	-12	0.74689	0.00881
					8373.4	0.97581	0.96873	1.0149														8.37554	0.01085	0.03797	8.37554	0.00113	0.00126	8.42554	0.03654	0.03797			-12	0.77178	0.00473	-12	0.77178	0.04965	-12	0.77178	0.00779
					8373.65	0.9758	0.96999	1.00997														8.40621	0.0106	0.03688	8.40621	0.00128	0.00139	8.45621	0.03533	0.03688			-12	0.79668	0.00421	-12	0.79668	0.04165	-12	0.79668	0.00674
					8373.9	0.97542	0.96928	1.00579														8.43689	0.01082	0.03579	8.43689	0.00145	0.00154	8.48689	0.03444	0.03579			-12	0.82158	0.00371	-12	0.82158	0.03423	-12	0.82158	0.00573
					8374.15	0.97563	0.97104	1.00198														8.46757	0.01155	0.03467	8.46757	0.00165	0.00168	8.51757	0.0338	0.03467			-12	0.84647	0.00325	-12	0.84647	0.02761	-12	0.84647	0.00479
					8374.4	0.97489	0.97176	0.99951														8.49825	0.01266	0.03353	8.49825	0.00185	0.00183	8.54825	0.03331	0.03353			-12	0.87137	0.00283	-12	0.87137	0.02191	-12	0.87137	0.00395
					8374.66	0.9765	0.97258	0.99867														8.52893	0.01393	0.03237	8.52893	0.00205	0.00195	8.57893	0.03285	0.03237			-12	0.89627	0.00245	-12	0.89627	0.01714	-12	0.89627	0.00323
					8374.91	0.97527	0.97241	0.99901														8.55961	0.01512	0.03118	8.55961	0.00224	0.00206	8.60961	0.03229	0.03118			-12	0.92116	0.00212	-12	0.92116	0.01327	-12	0.92116	0.00262
					8375.16	0.97563	0.97319	1.00003														8.59029	0.01605	0.02997	8.59029	0.00239	0.00213	8.64029	0.03151	0.02997			-12	0.94606	0.00182	-12	0.94606	0.01021	-12	0.94606	0.00212
					8375.41	0.97622	0.97433	1.00125														8.62097	0.01657	0.02873	8.62097	0.0025	0.00219	8.67097	0.03044	0.02873			-12	0.97095	0.00154	-12	0.97095	0.00784	-12	0.97095	0.00172
					8375.67	0.97577	0.97547	1.00206														8.65165	0.0166	0.02748	8.65165	0.00256	0.00222	8.70165	0.02908	0.02748			-12	0.99585	0.0013	-12	0.99585	0.00603	-12	0.99585	0.00139
					8375.92	0.97722	0.97669	1.00176														8.68233	0.01612	0.02622	8.68233	0.00256	0.00224	8.73233	0.02743	0.02622			-12	1.02075	0.00109	-12	1.02075	0.00467	-12	1.02075	0.00113
					8376.17	0.97761	0.97603	1.00029														8.71301	0.01515	0.02495	8.71301	0.0025	0.00226	8.76301	0.02557	0.02495			-12	1.04564	0.000899553	-12	1.04564	0.00365	-12	1.04564	0.000922627
					8376.42	0.97881	0.97735	0.99724														8.74369	0.01375	0.02368	8.74369	0.00239	0.00228	8.79369	0.02361	0.02368			-12	1.07054	0.00073697	-12	1.07054	0.00287	-12	1.07054	0.000751944
					8376.68	0.97978	0.97741	0.99353														8.77437	0.01206	0.02241	8.77437	0.00224	0.00231	8.82437	0.02167	0.02241			-12	1.09544	0.000597859	-12	1.09544	0.00229	-12	1.09544	0.000612001
					8376.93	0.98099	0.98057	0.98955														8.80505	0.01029	0.02117	8.80505	0.00209	0.00235	8.85505	0.0199	0.02117			-12	1.12033	0.00048023	-12	1.12033	0.00183	-12	1.12033	0.00049651
					8378.18	0.98091	0.98261	0.98636														8.83573	0.00873	0.01998	8.83573	0.00198	0.00242	8.88573	0.01841	0.01998			-12	1.14523	0.000381936	-12	1.14523	0.00147	-12	1.14523	0.000400881
					8379.46	0.98034	0.98841	0.98519														8.86641	0.00779	0.01885	8.86641	0.00196	0.00249	8.91641	0.0173	0.01885			-12	1.17012	0.000300777	-12	1.17012	0.00118	-12	1.17012	0.000321713
					8380.75	0.97968	0.99107	0.98555														8.89709	0.0078	0.01781	8.89709	0.00206	0.00259	8.94709	0.01656	0.01781			-12	1.19502	0.000234578	-12	1.19502	0.000950872	-12	1.19502	0.000256398
					8382.07	0.98277	0.99196	0.98635														8.92777	0.00865	0.01688	8.92777	0.00228	0.00269	8.97777	0.01614	0.01688			-12	1.21992	0.000181254	-12	1.21992	0.000761349	-12	1.21992	0.000202832
					8383.4	0.98343	0.99145	0.98721														8.95845	0.00996	0.01607	8.95845	0.00258	0.0028	9.00845	0.01591	0.01607			-12	1.24481	0.000138842	-12	1.24481	0.000606892	-12	1.24481	0.000159247
					8384.75	0.97854	0.98978	0.98784														8.98913	0.01134	0.01541	8.98913	0.0029	0.0029	9.03913	0.01575	0.01541			-12	1.26971	0.00010554	-12	1.26971	0.000481264	-12	1.26971	0.000124105
					8386.12	0.97647	0.98638	0.98865														9.01981	0.01256	0.01488	9.01981	0.0032	0.003	9.06981	0.01556	0.01488			-12	1.29461	7.97168e-05	-12	1.29461	0.00037953	-12	1.29461	9.60447e-05
					8387.51	0.97287	0.98202	0.98968														9.05049	0.01348	0.01447	9.05049	0.00345	0.00308	9.10049	0.01526	0.01447			-12	1.3195	5.99288e-05	-12	1.3195	0.000297625	-12	1.3195	7.38608e-05
					8388.92	0.97335	0.97775	0.99097														9.08117	0.01405	0.01416	9.08117	0.00364	0.00314	9.13117	0.01485	0.01416			-12	1.3444	4.49236e-05	-12	1.3444	0.000232118	-12	1.3444	5.64903e-05
					8390.35	0.96843	0.97571	0.99238														9.11185	0.0143	0.01393	9.11185	0.00373	0.00319	9.16185	0.01434	0.01393			-12	1.36929	3.36394e-05	-12	1.36929	0.000180081	-12	1.36929	4.30088e-05
					8391.8	0.96672	0.97203	0.99403														9.14253	0.01427	0.01372	9.14253	0.00373	0.00323	9.19253	0.01379	0.01372			-12	1.39419	2.51988e-05	-12	1.39419	0.00013902	-12	1.39419	3.26266e-05
					8393.26	0.96341	0.96785	0.99567														9.17321	0.01405	0.01351	9.17321	0.00364	0.00326	9.22321	0.01325	0.01351			-12	1.41909	1.88968e-05	-12	1.41909	0.000106825	-12	1.41909	2.46815e-05
					8394.75	0.96409	0.96619	0.99739														9.20388	0.01376	0.01326	9.20388	0.00347	0.00327	9.25388	0.01278	0.01326			-12	1.44398	1.41836e-05	-12	1.44398	8.17282e-05	-12	1.44398	1.86302e-05
					8396.26	0.95959	0.96575	0.99919														9.23456	0.01349	0.01294	9.23456	0.00325	0.00327	9.28456	0.01242	0.01294			-12	1.46888	1.06437e-05	-12	1.46888	6.22693e-05	-12	1.46888	1.40356e-05
					8397.78	0.9587	0.96874	1.00091														9.26524	0.01335	0.01251	9.26524	0.00301	0.00326	9.31524	0.01214	0.01251			-12	1.49378	7.97066e-06	-12	1.49378	4.72549e-05	-12	1.49378	1.05533e-05
					8399.32	0.96041	0.97266	1.00266														9.29592	0.01336	0.01196	9.29592	0.0028	0.00325	9.34592	0.01193	0.01196			-12	1.51867	5.94289e-06	-12	1.51867	3.57217e-05	-12	1.51867	7.91633e-06
					8400.89	0.96405	0.97591	1.00466														9.3266	0.01349	0.01131	9.3266	0.00267	0.00324	9.3766	0.01171	0.01131			-12	1.54357	4.401e-06	-12	1.54357	2.68993e-05	-12	1.54357	5.92056e-06
					8402.47	0.96312	0.97683	1.00652														9.35728	0.01367	0.01059	9.35728	0.00265	0.00324	9.40728	0.01141	0.01059			-12	1.56847	3.22948e-06	-12	1.56847	2.01775e-05	-12	1.56847	4.41124e-06
					8404.07	0.9649	0.97701	1.00816														9.38796	0.0138	0.00984	9.38796	0.00276	0.00324	9.43796	0.01097	0.00984			-12	1.59336	2.34311e-06	-12	1.59336	1.50759e-05	-12	1.59336	3.27154e-06
					8405.69	0.96632	0.97753	1.00971														9.41864	0.01377	0.0091	9.41864	0.00295	0.00324	9.46864	0.01035	0.0091			-12	1.61826	1.67742e-06	-12	1.61826	1.1219e-05	-12	1.61826	2.41314e-06
					8407.33	0.96802	0.97699	1.01126														9.44932	0.01352	0.00839	9.44932	0.00319	0.00324	9.49932	0.00954	0.00839			-12	1.64315	1.18254e-06	-12	1.64315	8.31457e-06	-12	1.64315	1.76902e-06
					8408.99	0.96601	0.98091	1.01265														9.48	0.01301	0.00774	9.48	0.00341	0.00323	9.53	0.00854	0.00774			-12	1.66805	8.1922e-07	-12	1.66805	6.13615e-06	-12	1.66805	1.28806e-06
					8410.67	0.96714	0.98071	1.0139														9.51068	0.01222	0.00716	9.51068	0.00359	0.00322	9.56068	0.0074	0.00716			-12	1.69295	5.56347e-07	-12	1.69295	4.50906e-06	-12	1.69295	9.31054e-07
					8412.36	0.96854	0.98406	1.01528														9.54136	0.01118	0.00665	9.54136	0.00369	0.00319	9.59136	0.00619	0.00665			-12	1.71784	3.69271e-07	-12	1.71784	3.29896e-06	-12	1.71784	6.67863e-07
					8414.08	0.96516	0.98561	1.0164														9.57204	0.00997	0.00623	9.57204	0.0037	0.00316	9.62204	0.00502	0.00623			-12	1.74274	2.38602e-07	-12	1.74274	2.40294e-06	-12	1.74274	4.75282e-07
					8415.82	0.9662	0.98815	1.0171														9.60272	0.00869	0.00589	9.60272	0.00362	0.00312	9.65272	0.00409	0.00589			-12	1.76764	1.49273e-07	-12	1.76764	1.74247e-06	-12	1.76764	3.3549e-07
					8417.57	0.9678	0.99212	1.01722														9.6334	0.00752	0.00571	9.6334	0.00345	0.00308	9.6834	0.00366	0.00571			-12	1.79253	8.97732e-08	-12	1.79253	1.25786e-06	-12	1.79253	2.34861e-07
					8419.34	0.9712	0.99279	1.01692														9.66408	0.00665	0.00561	9.66408	0.00321	0.00304	9.71408	0.00385	0.00561			-12	1.81743	5.15056e-08	-12	1.81743	9.03943e-07	-12	1.81743	1.63043e-07
					8421.14	0.97077	0.99563	1.01567														9.69476	0.00629	0.00559	9.69476	0.00292	0.00299	9.74476	0.00449	0.00559			-12	1.84232	2.82938e-08	-12	1.84232	6.46686e-07	-12	1.84232	1.12233e-07
					8422.95	0.97173	0.99804	1.01415														9.72544	0.00649	0.00564	9.72544	0.00261	0.00293	9.77544	0.0053	0.00564			-12	1.86722	1.59886e-08	-12	1.86722	4.6057e-07	-12	1.86722	7.6601e-08
					8424.78	0.97375	1.00052	1.01216														9.75612	0.00708	0.00578	9.75612	0.00234	0.00286	9.80612	0.0061	0.00578			-12	1.89212	1.14031e-08	-12	1.89212	3.26557e-07	-12	1.89212	5.18345e-08
					8426.63	0.97475	1.00411	1.00945														9.7868	0.00783	0.006	9.7868	0.00215	0.00278	9.8368	0.00679	0.006			-12	1.91701	1.04353e-08	-12	1.91701	2.30515e-07	-12	1.91701	3.47731e-08
					8428.5	0.97545	1.00841	1.00713														9.81748	0.00854	0.0063	9.81748	0.00209	0.0027	9.86748	0.00734	0.0063			-12	1.94191	9.96165e-09	-12	1.94191	1.62007e-07	-12	1.94191	2.31248e-08
					8430.39	0.97626	1.01035	1.0048														9.84816	0.00909	0.00667	9.84816	0.00216	0.00261	9.89816	0.00772	0.00667			-12	1.9668	9.13655e-09	-12	1.9668	1.13367e-07	-12	1.9668	1.5244e-08
					8432.3	0.9784	1.01125	1.00323														9.87884	0.00943	0.00713	9.87884	0.00232	0.00251	9.92884	0.00797	0.00713			-12	1.9917	8.00522e-09	-12	1.9917	7.8991e-08	-12	1.9917	9.961e-09
					8434.23	0.97799	1.01004	1.0024														9.90952	0.00955	0.00767	9.90952	0.0025	0.0024	9.95952	0.0081	0.00767			-12	2.0166	6.75352e-09	-12	2.0166	5.4807e-08	-12	2.0166	6.45241e-09
					8436.17	0.97635	1.00727	1.00182														9.9402	0.00948	0.00828	9.9402	0.00267	0.00228	9.9902	0.00813	0.00828			-12	2.04149	5.52869e-09	-12	2.04149	3.78695e-08	-12	2.04149	4.14454e-09
					8438.14	0.97837	1.00392	1.00204														9.97088	0.00926	0.00898	9.97088	0.00279	0.00216	10.0209	0.0081	0.00898			-12	2.06639	4.4179e-09	-12	2.06639	2.60599e-08	-12	2.06639	2.64142e-09
					8440.12	0.97582	0.99931	1.00238																									-12	2.09129	3.46093e-09	-12	2.09129	1.78616e-08	-12	2.09129	1.67242e-09
					8442.13	0.97509	0.99712	1.00298																									-12	2.11618	2.6665e-09	-12	2.11618	1.21946e-08	-12	2.11618	1.05433e-09
					8444.15	0.97449	0.99374	1.00335																									-12	2.14108	2.02536e-09	-12	2.14108	8.294e-09	-12	2.14108	6.64295e-10
					8446.19	0.97321	0.99029	1.00379																									-12	2.16598	1.51941e-09	-12	2.16598	5.62018e-09	-12	2.16598	4.20713e-10
					8448.25	0.97067	0.98741	1.00412																									-12	2.19087	1.1274e-09	-12	2.19087	3.7947e-09	-12	2.19087	2.69871e-10
					8450.33	0.96905	0.98537	1.00404																									-12	2.21577	8.28338e-10	-12	2.21577	2.55327e-09	-12	2.21577	1.76777e-10
					8452.43	0.96893	0.9802	1.00343																									-12	2.24066	6.03193e-10	-12	2.24066	1.71224e-09	-12	2.24066	1.18957e-10
					8454.55	0.96673	0.97648	1.00256																									-12	2.26556	4.3566e-10	-12	2.26556	1.14456e-09	-12	2.26556	8.23116e-11
					8456.69	0.96635	0.97428	1.00095																									-12	2.29046	3.12282e-10	-12	2.29046	7.62744e-10	-12	2.29046	5.82977e-11
					8458.85	0.96693	0.97402	0.99966																									-12	2.31535	2.22267e-10	-12	2.31535	5.06805e-10	-12	2.31535	4.19366e-11
					8461.02	0.96666	0.97446	0.99833																									-12	2.34025	1.5715e-10	-12	2.34025	3.35802e-10	-12	2.34025	3.03986e-11
					8463.22	0.96753	0.97728	0.99717																									-12	2.36515	1.10414e-10	-12	2.36515	2.21902e-10	-12	2.36515	2.2066e-11
					8465.43	0.96813	0.98084	0.99683																									-12	2.39004	7.7115e-11	-12	2.39004	1.4626e-10	-12	2.39004	1.59725e-11
					8467.67	0.97069	0.98212	0.99659																									-12	2.41494	5.35513e-11	-12	2.41494	9.61661e-11	-12	2.41494	1.15003e-11
					8469.92	0.97221	0.98707	0.9962																									-12	2.43983	3.69844e-11	-12	2.43983	6.30794e-11	-12	2.43983	8.22494e-12
					8472.19	0.97346	0.9921	0.99569																									-12	2.46473	2.5408e-11	-12	2.46473	4.12814e-11	-12	2.46473	5.83951e-12
					8474.48	0.97577	0.99466	0.99497																									-12	2.48963	1.73661e-11	-12	2.48963	2.69552e-11	-12	2.48963	4.11485e-12
					8476.79	0.9766	0.99477	0.9946																									-12	2.51452	1.18109e-11	-12	2.51452	1.75617e-11	-12	2.51452	2.87798e-12
					8479.12	0.9778	0.99519	0.99432																									-12	2.53942	7.99418e-12	-12	2.53942	1.14164e-11	-12	2.53942	1.99829e-12
					8481.47	0.97638	0.99414	0.99437																									-12	2.56432	5.38551e-12	-12	2.56432	7.40498e-12	-12	2.56432	1.37775e-12
					8483.84	0.9776	0.99761	0.99466																									-12	2.58921	3.61154e-12	-12	2.58921	4.79226e-12	-12	2.58921	9.43507e-13
					8486.23	0.98063	1.00101	0.9951																									-12	2.61411	2.41111e-12	-12	2.61411	3.09426e-12	-12	2.61411	6.41947e-13
					8488.63	0.98179	1.00868	0.99599																									-12	2.639	1.60265e-12	-12	2.639	1.99319e-12	-12	2.639	4.3406e-13
					8491.06	0.98513	1.0149	0.99701																									-12	2.6639	1.06072e-12	-12	2.6639	1.28082e-12	-12	2.6639	2.91747e-13
					8493.5	0.98907	1.01722	0.99809																									-12	2.6888	6.99088e-13	-12	2.6888	8.20997e-13	-12	2.6888	1.94971e-13
					8495.97	0.99206	1.01979	0.99933																									-12	2.71369	4.58847e-13	-12	2.71369	5.249e-13	-12	2.71369	1.2958e-13
					8498.45	0.993	1.02062	1.0007																									-12	2.73859	2.99942e-13	-12	2.73859	3.34704e-13	-12	2.73859	8.56635e-14
					8500.95	0.99806	1.01902	1.00214																									-12	2.76349	1.95284e-13	-12	2.76349	2.12844e-13	-12	2.76349	5.6341e-14
					8503.47	0.9948	1.01986	1.00368																									-12	2.78838	1.26644e-13	-12	2.78838	1.34975e-13	-12	2.78838	3.68721e-14
					8506.01	0.99613	1.01583	1.00533																									-12	2.81328	8.18106e-14	-12	2.81328	8.53505e-14	-12	2.81328	2.40149e-14
					8508.57	1.00377	1.0091	1.00692																									-12	2.83817	5.2646e-14	-12	2.83817	5.38146e-14	-12	2.83817	1.55681e-14
					8511.15	1.00466	1.00273	1.00826																									-12	2.86307	3.37499e-14	-12	2.86307	3.38311e-14	-12	2.86307	1.00466e-14
					8513.75	1.00452	0.99578	1.00922																									-12	2.88797	2.15549e-14	-12	2.88797	2.1205e-14	-12	2.88797	6.45472e-15
					8516.37	1.00746	0.98697	1.00985																									-12	2.91286	1.37153e-14	-12	2.91286	1.32512e-14	-12	2.91286	4.12913e-15
					8519	1.0053	0.97824	1.00978																									-12	2.93776	8.69481e-15	-12	2.93776	8.25588e-15	-12	2.93776	2.63029e-15
					8521.66	1.00659	0.97204	1.00913																									-12	2.96266	5.49197e-15	-12	2.96266	5.12808e-15	-12	2.96266	1.66858e-15
					8524.33	1.00951	0.96957	1.00763																									-12	2.98755	3.45636e-15	-12	2.98755	3.17562e-15	-12	2.98755	1.0542e-15
					8527.03	1.00702	0.97062	1.00602																									-12	3.01245	2.16742e-15	-12	3.01245	1.96059e-15	-12	3.01245	6.63379e-16
					8529.74	1.0095	0.97575	1.00415																									-12	3.03734	1.35429e-15	-12	3.03734	1.2068e-15	-12	3.03734	4.15802e-16
					8532.47	1.00929	0.98263	1.00236																									-12	3.06224	8.43201e-16	-12	3.06224	7.4058e-16	-12	3.06224	2.5961e-16
					8535.22	1.0097	0.98766	1.00087																									-12	3.08714	5.23129e-16	-12	3.08714	4.53115e-16	-12	3.08714	1.61468e-16
					8537.99	1.01176	0.99379	0.99942																									-12	3.11203	3.23409e-16	-12	3.11203	2.76407e-16	-12	3.11203	1.00045e-16
					8540.78	1.00731	0.99738	0.99859																									-12	3.13693	1.99235e-16	-12	3.13693	1.68112e-16	-12	3.13693	6.17549e-17
					8543.59	1.00694	0.99902	0.99795																									-12	3.16183	1.22309e-16	-12	3.16183	1.01945e-16	-12	3.16183	3.7977e-17
					8546.42	1.00973	1.00006	0.99746																									-12	3.18672	7.48217e-17	-12	3.18672	6.16391e-17	-12	3.18672	2.32679e-17
					8549.26	1.00712	0.9995	0.99696																									-12	3.21162	4.56123e-17	-12	3.21162	3.71597e-17	-12	3.21162	1.42034e-17
					8552.13	1.00664	0.99961	0.99654																									-12	3.23651	2.77092e-17	-12	3.23651	2.23365e-17	-12	3.23651	8.63839e-18
					8555.01	1.01019	0.99786	0.99634																									-12	3.26141	1.67748e-17	-12	3.26141	1.33873e-17	-12	3.26141	5.23464e-18
					8557.92	1.00642	0.99717	0.9961																									-12	3.28631	1.01201e-17	-12	3.28631	8.00015e-18	-12	3.28631	3.16053e-18
					8560.84	1.00644	0.99505	0.99595																									-12	3.3112	6.08424e-18	-12	3.3112	4.76689e-18	-12	3.3112	1.90134e-18
					8563.78	1.00984	0.99517	0.99554																									-12	3.3361	3.64524e-18	-12	3.3361	2.83204e-18	-12	3.3361	1.1397e-18
					8566.75	1.00747	0.99706	0.99511																									-12	3.361	2.17643e-18	-12	3.361	1.67759e-18	-12	3.361	6.80703e-19
					8569.73	1.01171	0.99903	0.99485																									-12	3.38589	1.29499e-18	-12	3.38589	9.90813e-19	-12	3.38589	4.05102e-19
					8572.73	1.01254	1.00436	0.99454																									-12	3.41079	7.67872e-19	-12	3.41079	5.83456e-19	-12	3.41079	2.40223e-19
					8575.75	1.01131	1.00791	0.99402																									-12	3.43568	4.53749e-19	-12	3.43568	3.42553e-19	-12	3.43568	1.41942e-19
					8578.78	1.01158	1.01079	0.99354																									-12	3.46058	2.67207e-19	-12	3.46058	2.00513e-19	-12	3.46058	8.35716e-20
					8581.84	1.00974	1.01314	0.99312																									-12	3.48548	1.56814e-19	-12	3.48548	1.17015e-19	-12	3.48548	4.90298e-20
					8584.92	1.00955	1.01307	0.99259																									-12	3.51037	9.17126e-20	-12	3.51037	6.80799e-20	-12	3.51037	2.86627e-20
					8588.01	1.01399	1.01096	0.99197																									-12	3.53527	5.3454e-20	-12	3.53527	3.94876e-20	-12	3.53527	1.66969e-20
					8591.13	1.01028	1.00776	0.99118																									-12	3.56017	3.10485e-20	-12	3.56017	2.28327e-20	-12	3.56017	9.69202e-21
					8594.26	1.01003	1.00543	0.99033																									-12	3.58506	1.79725e-20	-12	3.58506	1.31613e-20	-12	3.58506	5.60607e-21
					8597.41	1.00651	0.99993	0.98988																									-12	3.60996	1.03678e-20	-12	3.60996	7.56268e-21	-12	3.60996	3.23125e-21
					8600.59	1.00362	0.99664	0.98946																									-12	3.63485	5.96034e-21	-12	3.63485	4.33188e-21	-12	3.63485	1.8559e-21
					8603.78	1.00093	0.99286	0.98925																									-12	3.65975	3.41481e-21	-12	3.65975	2.47339e-21	-12	3.65975	1.06221e-21
					8606.99	0.99686	0.99249	0.98777																									-12	3.68465	1.94971e-21	-12	3.68465	1.40771e-21	-12	3.68465	6.05814e-22
					8610.22	0.99672	0.99247	0.98885																									-12	3.70954	1.10939e-21	-12	3.70954	7.98603e-22	-12	3.70954	3.44308e-22
					8613.47	0.99549	0.99253	0.98877																									-12	3.73444	6.29083e-22	-12	3.73444	4.51581e-22	-12	3.73444	1.95e-22
					8616.73	0.99107	0.99455	0.9887																									-12	3.75934	3.555e-22	-12	3.75934	2.5452e-22	-12	3.75934	1.10054e-22
					8620.02	0.99376	0.99438	0.98868																									-12	3.78423	2.00208e-22	-12	3.78423	1.42981e-22	-12	3.78423	6.18957e-23
					8623.33	0.99316	0.99565	0.98851																									-12	3.80913	1.12365e-22	-12	3.80913	8.00575e-23	-12	3.80913	3.46897e-23
					8626.65	0.99378	0.99493	0.98853																									-12	3.83403	6.28473e-23	-12	3.83403	4.46771e-23	-12	3.83403	1.93745e-23
					8630	0.99634	0.99537	0.9886																									-12	3.85892	3.50309e-23	-12	3.85892	2.48497e-23	-12	3.85892	1.07832e-23
					8633.36	0.9931	0.99707	0.98871																									-12	3.88382	1.9459e-23	-12	3.88382	1.37754e-23	-12	3.88382	5.98079e-24
					8636.74	0.99514	0.99794	0.98888																									-12	3.90871	1.07721e-23	-12	3.90871	7.6108e-24	-12	3.90871	3.30569e-24
					8640.14	0.99346	1.00082	0.98908																									-12	3.93361	5.94266e-24	-12	3.93361	4.19078e-24	-12	3.93361	1.82079e-24
					8643.56	0.99421	1.00223	0.9893																									-12	3.95851	3.26714e-24	-12	3.95851	2.29982e-24	-12	3.95851	9.99432e-25
					8647	0.99629	1.00153	0.98922																									-12	3.9834	1.79003e-24	-12	3.9834	1.25783e-24	-12	3.9834	5.46694e-25
					8650.46	0.99424	1.00363	0.98909																									-12	4.0083	9.77358e-25	-12	4.0083	6.85614e-25	-12	4.0083	2.98012e-25
					8653.94	0.99301	1.00506	0.98872																									-12	4.0332	5.31803e-25	-12	4.0332	3.72443e-25	-12	4.0332	1.6189e-25
					8657.44	0.9948	1.00781	0.98834																									-12	4.05809	2.88369e-25	-12	4.05809	2.01633e-25	-12	4.05809	8.76415e-26
					8660.95	0.99622	1.00744	0.98793																									-12	4.08299	1.55829e-25	-12	4.08299	1.08788e-25	-12	4.08299	4.72823e-26
					8664.49	0.99882	1.00775	0.98745																									-12	4.10788	8.39165e-26	-12	4.10788	5.8495e-26	-12	4.10788	2.54208e-26
					8668.04	0.99932	1.00825	0.98684																									-12	4.13278	4.50345e-26	-12	4.13278	3.13451e-26	-12	4.13278	1.36202e-26
					8671.62	1.0001	1.01063	0.98626																									-12	4.15768	2.40847e-26	-12	4.15768	1.67391e-26	-12	4.15768	7.2724e-27
					8675.21	1.0009	1.00933	0.98565																									-12	4.18257	1.28362e-26	-12	4.18257	8.90855e-27	-12	4.18257	3.86969e-27
					8678.82	0.99721	1.00823	0.98487																									-12	4.20747	6.81751e-27	-12	4.20747	4.72487e-27	-12	4.20747	2.05201e-27
					8682.45	0.99844	1.00601	0.98411																									-12	4.23236	3.60838e-27	-12	4.23236	2.49736e-27	-12	4.23236	1.08439e-27
					8686.1	0.9956	1.0051	0.98314																									-12	4.25726	1.90324e-27	-12	4.25726	1.31546e-27	-12	4.25726	5.71076e-28
					8689.77	0.99115	1.00225	0.9823																									-12	4.28216	1.00039e-27	-12	4.28216	6.90524e-28	-12	4.28216	2.99715e-28
					8693.46	0.99159	1.00201	0.98151																									-12	4.30705	5.24007e-28	-12	4.30705	3.61231e-28	-12	4.30705	1.56757e-28
					8697.17	0.99202	1.00201	0.98063																									-12	4.33195	2.73526e-28	-12	4.33195	1.88318e-28	-12	4.33195	8.1705e-29
					8700.9	0.99246	1.00113	0.97998																									-12	4.35685	1.42282e-28	-12	4.35685	9.7837e-29	-12	4.35685	4.244e-29
					8704.64	0.99189	1.00138	0.97923																									-12	4.38174	7.37557e-29	-12	4.38174	5.0654e-29	-12	4.38174	2.19688e-29
					8708.41	0.9918	1.00017	0.97867																									-12	4.40664	3.81005e-29	-12	4.40664	2.61351e-29	-12	4.40664	1.13329e-29
					8712.19	0.99229	0.99907	0.97852																									-12	4.43154	1.96135e-29	-12	4.43154	1.3438e-29	-12	4.43154	5.82615e-30
					8716	0.99096	0.99808																										-12	4.45643	1.00617e-29	-12	4.45643	6.88563e-30	-12	4.45643	2.98487e-30
					8719.82	0.99219	0.99804																										-12	4.48133	5.14367e-30	-12	4.48133	3.51601e-30	-12	4.48133	1.52396e-30
					8723.66	0.99087	0.99663																										-12	4.50622	2.62038e-30	-12	4.50622	1.78918e-30	-12	4.50622	7.75398e-31
					8727.52	0.99098	0.99819																										-12	4.53112	1.33028e-30	-12	4.53112	9.07305e-31	-12	4.53112	3.93169e-31
					8731.4	0.99017	0.99742																										-12	4.55602	6.72992e-31	-12	4.55602	4.58511e-31	-12	4.55602	1.98673e-31
					8735.3	0.99102	0.99838																										-12	4.58091	3.39283e-31	-12	4.58091	2.30909e-31	-12	4.58091	1.00046e-31
					8739.22	0.99362	0.99822																										-12	4.60581	1.70452e-31	-12	4.60581	1.15885e-31	-12	4.60581	5.02071e-32
					8743.16	0.99463	0.99884																										-12	4.6307	8.53349e-32	-12	4.6307	5.79572e-32	-12	4.6307	2.51092e-32
					8747.11	0.99407	0.99865																										-12	4.6556	4.25733e-32	-12	4.6556	2.88857e-32	-12	4.6556	1.25142e-32
					8751.09	0.99793	0.99924																										-12	4.6805	2.11657e-32	-12	4.6805	1.43466e-32	-12	4.6805	6.2155e-33
					8755.08	0.99769	0.99989																										-12	4.70539	1.04861e-32	-12	4.70539	7.10087e-33	-12	4.70539	3.07645e-33
					8759.1	1.00109	0.99914																										-12	4.73029	5.17699e-33	-12	4.73029	3.5024e-33	-12	4.73029	1.51749e-33
					8763.13	1.00194	0.99903																										-12	4.75519	2.54698e-33	-12	4.75519	1.72152e-33	-12	4.75519	7.45942e-34
					8767.18	1.00073	0.9998																										-12	4.78008	1.2487e-33	-12	4.78008	8.4324e-34	-12	4.78008	3.65413e-34
					8771.25	1.00603	0.99978																										-12	4.80498	6.10063e-34	-12	4.80498	4.11606e-34	-12	4.80498	1.78388e-34
					8775.34	1.01076	0.99986																										-12	4.82988	2.97012e-34	-12	4.82988	2.00218e-34	-12	4.82988	8.67852e-35
					8779.45	1.01593	0.99895																										-12	4.85477	1.44098e-34	-12	4.85477	9.70549e-35	-12	4.85477	4.20753e-35
					8783.58	1.01558	0.99706																										-12	4.87967	6.96662e-35	-12	4.87967	4.68837e-35	-12	4.87967	2.03286e-35
					8787.73	1.01806	0.99866																										-12	4.90456	3.35638e-35	-12	4.90456	2.25693e-35	-12	4.90456	9.78789e-36
					8791.89	1.02088	0.99363																										-12	4.92946	1.61139e-35	-12	4.92946	1.08269e-35	-12	4.92946	4.69645e-36
					8796.08	1.01809	0.99326																										-12	4.95436	7.70931e-36	-12	4.95436	5.17583e-36	-12	4.95436	2.24569e-36
					8800.29	1.01856	0.99262																										-12	4.97925	3.67546e-36	-12	4.97925	2.46573e-36	-12	4.97925	1.07011e-36
					8804.51	1.01448	0.99172																										-12	5.00415	1.74618e-36	-12	5.00415	1.17058e-36	-12	5.00415	5.08164e-37
					8808.75	1.00916	0.99427																										-12	5.02905	8.26705e-37	-12	5.02905	5.53795e-37	-12	5.02905	2.4048e-37
					8813.02	1.01264	0.99378																										-12	5.05394	3.90026e-37	-12	5.05394	2.61087e-37	-12	5.05394	1.1341e-37
					8817.3	1.00966	0.99349																										-12	5.07884	1.83366e-37	-12	5.07884	1.22662e-37	-12	5.07884	5.32992e-38
					8821.6	1.01013	0.99327																										-12	5.10373	8.59063e-38	-12	5.10373	5.74283e-38	-12	5.10373	2.49625e-38
					8825.92	1.00467	0.9934																										-12	5.12863	4.01064e-38	-12	5.12863	2.67935e-38	-12	5.12863	1.16507e-38
					8830.26	1.00373	0.99075																										-12	5.15353	1.86589e-38	-12	5.15353	1.24573e-38	-12	5.15353	5.41889e-39
					8834.61	1.00567	0.99123																										-12	5.17842	8.65043e-39	-12	5.17842	5.77171e-39	-12	5.17842	2.51169e-39
					8838.99	1.00427	0.98998																										-12	5.20332	3.99643e-39	-12	5.20332	2.66487e-39	-12	5.20332	1.16016e-39
					8843.39	1.00671	0.99076																										-12	5.22822	1.83988e-39	-12	5.22822	1.22612e-39	-12	5.22822	5.34026e-40
					8847.8	0.99793	0.9899																										-12	5.25311	8.44089e-40	-12	5.25311	5.62189e-40	-12	5.25311	2.44965e-40
					8852.24	1.00065	0.99041																										-12	5.27801	3.85895e-40	-12	5.27801	2.56873e-40	-12	5.27801	1.11979e-40
					8856.69	1.00618	0.98783																										-12	5.30291	1.75805e-40	-12	5.30291	1.16961e-40	-12	5.30291	5.10114e-41
					8861.16	1.00436	0.9887																										-12	5.3278	7.98135e-41	-12	5.3278	5.30706e-41	-12	5.3278	2.31574e-41
					8865.66	1.00557	0.98749																										-12	5.3527	3.6108e-41	-12	5.3527	2.39968e-41	-12	5.3527	1.04763e-41
					8870.17	1.00069	0.98929																										-12	5.37759	1.62784e-41	-12	5.37759	1.08129e-41	-12	5.37759	4.72296e-42
					8874.7	0.99737	0.98843																										-12	5.40249	7.31313e-42	-12	5.40249	4.85531e-42	-12	5.40249	2.12185e-42
					8879.25	0.99991	0.98923																										-12	5.42739	3.27398e-42	-12	5.42739	2.1726e-42	-12	5.42739	9.49967e-43
					8883.82	0.99625	0.99004																										-12	5.45228	1.4606e-42	-12	5.45228	9.68788e-43	-12	5.45228	4.23831e-43
					8888.4	0.99379	0.98995																										-12	5.47718	6.49336e-43	-12	5.47718	4.30492e-43	-12	5.47718	1.88438e-43
					8893.01	0.99328	0.99028																										-12	5.50207	2.87666e-43	-12	5.50207	1.90629e-43	-12	5.50207	8.34902e-44
																																	-12	5.52697	1.26996e-43	-12	5.52697	8.412e-44	-12	5.52697	3.68632e-44
																																	-12	5.55187	5.58696e-44	-12	5.55187	3.6991e-44	-12	5.55187	1.62196e-44
																																	-12	5.57676	2.4493e-44	-12	5.57676	1.62099e-44	-12	5.57676	7.11176e-45
																																	-12	5.60166	1.07002e-44	-12	5.60166	7.07862e-45	-12	5.60166	3.10744e-45
																																	-12	5.62656	4.65826e-45	-12	5.62656	3.08038e-45	-12	5.62656	1.35306e-45
																																	-12	5.65145	2.02087e-45	-12	5.65145	1.33581e-45	-12	5.65145	5.87114e-46
																																	-12	5.67635	8.73643e-46	-12	5.67635	5.77262e-46	-12	5.67635	2.53872e-46
																																	-12	5.70125	3.76369e-46	-12	5.70125	2.48591e-46	-12	5.70125	1.09394e-46
																																	-12	5.72614	1.61575e-46	-12	5.72614	1.0668e-46	-12	5.72614	4.69744e-47
																																	-12	5.75104	6.91225e-47	-12	5.75104	4.56213e-47	-12	5.75104	2.01009e-47
																																	-12	5.77593	2.94677e-47	-12	5.77593	1.94418e-47	-12	5.77593	8.57149e-48
																																	-12	5.80083	1.25186e-47	-12	5.80083	8.25636e-48	-12	5.80083	3.64237e-48
																																	-12	5.82573	5.29967e-48	-12	5.82573	3.49403e-48	-12	5.82573	1.5424e-48
																																	-12	5.85062	2.23575e-48	-12	5.85062	1.4735e-48	-12	5.85062	6.50874e-49
																																	-12	5.87552	9.39899e-49	-12	5.87552	6.19235e-49	-12	5.87552	2.73704e-49
																																	-12	5.90041	3.93751e-49	-12	5.90041	2.59326e-49	-12	5.90041	1.14697e-49
																																	-12	5.92531	1.64378e-49	-12	5.92531	1.08223e-49	-12	5.92531	4.78967e-50
																																	-12	5.95021	6.83832e-50	-12	5.95021	4.50069e-50	-12	5.95021	1.99317e-50
																																	-12	5.9751	2.8349e-50	-12	5.9751	1.86518e-50	-12	5.9751	8.26547e-51
																																	-12	6	1.17114e-50	-12	6	7.70276e-51	-12	6	3.41566e-51
																																	-11.95	0	0.01272	-11.95	0	0.02524	-11.95	0	0.00571
																																	-11.95	0.0249	0.02815	-11.95	0.0249	0.0559	-11.95	0.0249	0.01261
																																	-11.95	0.04979	0.0388	-11.95	0.04979	0.07732	-11.95	0.04979	0.01727
																																	-11.95	0.07469	0.04564	-11.95	0.07469	0.09144	-11.95	0.07469	0.02011
																																	-11.95	0.09959	0.04998	-11.95	0.09959	0.10089	-11.95	0.09959	0.02177
																																	-11.95	0.12448	0.05245	-11.95	0.12448	0.10692	-11.95	0.12448	0.02263
																																	-11.95	0.14938	0.05346	-11.95	0.14938	0.11031	-11.95	0.14938	0.02295
																																	-11.95	0.17427	0.05323	-11.95	0.17427	0.11157	-11.95	0.17427	0.02292
																																	-11.95	0.19917	0.05185	-11.95	0.19917	0.11102	-11.95	0.19917	0.0226
																																	-11.95	0.22407	0.04937	-11.95	0.22407	0.10888	-11.95	0.22407	0.02199
																																	-11.95	0.24896	0.04588	-11.95	0.24896	0.10538	-11.95	0.24896	0.02107
																																	-11.95	0.27386	0.04157	-11.95	0.27386	0.10087	-11.95	0.27386	0.01982
																																	-11.95	0.29875	0.03672	-11.95	0.29875	0.09571	-11.95	0.29875	0.01833
																																	-11.95	0.32365	0.03173	-11.95	0.32365	0.09025	-11.95	0.32365	0.0167
																																	-11.95	0.34855	0.02697	-11.95	0.34855	0.08476	-11.95	0.34855	0.01505
																																	-11.95	0.37344	0.02272	-11.95	0.37344	0.07943	-11.95	0.37344	0.01348
																																	-11.95	0.39834	0.01907	-11.95	0.39834	0.07458	-11.95	0.39834	0.01204
																																	-11.95	0.42324	0.0159	-11.95	0.42324	0.07072	-11.95	0.42324	0.01074
																																	-11.95	0.44813	0.01301	-11.95	0.44813	0.06858	-11.95	0.44813	0.00965
																																	-11.95	0.47303	0.01024	-11.95	0.47303	0.06877	-11.95	0.47303	0.00886
																																	-11.95	0.49793	0.00753	-11.95	0.49793	0.07134	-11.95	0.49793	0.00851
																																	-11.95	0.52282	0.00501	-11.95	0.52282	0.07556	-11.95	0.52282	0.00867
																																	-11.95	0.54772	0.00308	-11.95	0.54772	0.08027	-11.95	0.54772	0.00923
																																	-11.95	0.57261	0.00267	-11.95	0.57261	0.08427	-11.95	0.57261	0.00998
																																	-11.95	0.59751	0.00364	-11.95	0.59751	0.08665	-11.95	0.59751	0.01067
																																	-11.95	0.62241	0.00473	-11.95	0.62241	0.08687	-11.95	0.62241	0.01114
																																	-11.95	0.6473	0.00551	-11.95	0.6473	0.08478	-11.95	0.6473	0.01131
																																	-11.95	0.6722	0.0059	-11.95	0.6722	0.08052	-11.95	0.6722	0.01113
																																	-11.95	0.6971	0.00594	-11.95	0.6971	0.07445	-11.95	0.6971	0.01065
																																	-11.95	0.72199	0.00571	-11.95	0.72199	0.06709	-11.95	0.72199	0.0099
																																	-11.95	0.74689	0.00531	-11.95	0.74689	0.05898	-11.95	0.74689	0.00897
																																	-11.95	0.77178	0.00481	-11.95	0.77178	0.05064	-11.95	0.77178	0.00794
																																	-11.95	0.79668	0.00429	-11.95	0.79668	0.04253	-11.95	0.79668	0.00688
																																	-11.95	0.82158	0.00378	-11.95	0.82158	0.035	-11.95	0.82158	0.00585
																																	-11.95	0.84647	0.00332	-11.95	0.84647	0.02826	-11.95	0.84647	0.00489
																																	-11.95	0.87137	0.00289	-11.95	0.87137	0.02244	-11.95	0.87137	0.00404
																																	-11.95	0.89627	0.00251	-11.95	0.89627	0.01758	-11.95	0.89627	0.0033
																																	-11.95	0.92116	0.00217	-11.95	0.92116	0.01362	-11.95	0.92116	0.00269
																																	-11.95	0.94606	0.00186	-11.95	0.94606	0.01049	-11.95	0.94606	0.00218
																																	-11.95	0.97095	0.00159	-11.95	0.97095	0.00806	-11.95	0.97095	0.00176
																																	-11.95	0.99585	0.00134	-11.95	0.99585	0.0062	-11.95	0.99585	0.00143
																																	-11.95	1.02075	0.00112	-11.95	1.02075	0.00481	-11.95	1.02075	0.00117
																																	-11.95	1.04564	0.000928189	-11.95	1.04564	0.00376	-11.95	1.04564	0.000951285
																																	-11.95	1.07054	0.000761576	-11.95	1.07054	0.00297	-11.95	1.07054	0.000776357
																																	-11.95	1.09544	0.000618767	-11.95	1.09544	0.00236	-11.95	1.09544	0.000632792
																																	-11.95	1.12033	0.000497798	-11.95	1.12033	0.00189	-11.95	1.12033	0.000514168
																																	-11.95	1.14523	0.000396531	-11.95	1.14523	0.00152	-11.95	1.14523	0.000415801
																																	-11.95	1.17012	0.000312765	-11.95	1.17012	0.00123	-11.95	1.17012	0.000334235
																																	-11.95	1.19502	0.000244315	-11.95	1.19502	0.000987952	-11.95	1.19502	0.000266821
																																	-11.95	1.21992	0.000189074	-11.95	1.21992	0.000792375	-11.95	1.21992	0.000211432
																																	-11.95	1.24481	0.000145057	-11.95	1.24481	0.00063271	-11.95	1.24481	0.000166279
																																	-11.95	1.26971	0.00011043	-11.95	1.26971	0.000502611	-11.95	1.26971	0.000129802
																																	-11.95	1.29461	8.35332e-05	-11.95	1.29461	0.000397058	-11.95	1.29461	0.000100622
																																	-11.95	1.3195	6.28877e-05	-11.95	1.3195	0.000311917	-11.95	1.3195	7.75088e-05
																																	-11.95	1.3444	4.7208e-05	-11.95	1.3444	0.000243692	-11.95	1.3444	5.93778e-05
																																	-11.95	1.36929	3.54003e-05	-11.95	1.36929	0.000189396	-11.95	1.36929	4.52813e-05
																																	-11.95	1.39419	2.6557e-05	-11.95	1.39419	0.000146472	-11.95	1.39419	3.44071e-05
																																	-11.95	1.41909	1.99468e-05	-11.95	1.41909	0.000112753	-11.95	1.41909	2.6072e-05
																																	-11.95	1.44398	1.49978e-05	-11.95	1.44398	8.64207e-05	-11.95	1.44398	1.97135e-05
																																	-11.95	1.46888	1.12763e-05	-11.95	1.46888	6.5966e-05	-11.95	1.46888	1.48782e-05
																																	-11.95	1.49378	8.46215e-06	-11.95	1.49378	5.01542e-05	-11.95	1.49378	1.12077e-05
																																	-11.95	1.51867	6.32372e-06	-11.95	1.51867	3.79857e-05	-11.95	1.51867	8.42365e-06
																																	-11.95	1.54357	4.69439e-06	-11.95	1.54357	2.86599e-05	-11.95	1.54357	6.31286e-06
																																	-11.95	1.56847	3.45358e-06	-11.95	1.56847	2.15407e-05	-11.95	1.56847	4.71357e-06
																																	-11.95	1.59336	2.51238e-06	-11.95	1.59336	1.6127e-05	-11.95	1.59336	3.50349e-06
																																	-11.95	1.61826	1.80356e-06	-11.95	1.61826	1.20259e-05	-11.95	1.61826	2.59013e-06
																																	-11.95	1.64315	1.27507e-06	-11.95	1.64315	8.93126e-06	-11.95	1.64315	1.90321e-06
																																	-11.95	1.66805	8.85903e-07	-11.95	1.66805	6.60532e-06	-11.95	1.66805	1.38908e-06
																																	-11.95	1.69295	6.0344e-07	-11.95	1.69295	4.86433e-06	-11.95	1.69295	1.00652e-06
																																	-11.95	1.71784	4.01763e-07	-11.95	1.71784	3.5667e-06	-11.95	1.71784	7.23771e-07
																																	-11.95	1.74274	2.60409e-07	-11.95	1.74274	2.60375e-06	-11.95	1.74274	5.1635e-07
																																	-11.95	1.76764	1.63415e-07	-11.95	1.76764	1.89235e-06	-11.95	1.76764	3.65394e-07
																																	-11.95	1.79253	9.85359e-08	-11.95	1.79253	1.36918e-06	-11.95	1.79253	2.56442e-07
																																	-11.95	1.81743	5.65846e-08	-11.95	1.81743	9.86216e-07	-11.95	1.81743	1.78477e-07
																																	-11.95	1.84232	3.09265e-08	-11.95	1.84232	7.07193e-07	-11.95	1.84232	1.23171e-07
																																	-11.95	1.86722	1.71188e-08	-11.95	1.86722	5.04853e-07	-11.95	1.86722	8.42824e-08
																																	-11.95	1.89212	1.19256e-08	-11.95	1.89212	3.5881e-07	-11.95	1.89212	5.7179e-08
																																	-11.95	1.91701	1.09786e-08	-11.95	1.91701	2.53892e-07	-11.95	1.91701	3.8457e-08
																																	-11.95	1.94191	1.06293e-08	-11.95	1.94191	1.78871e-07	-11.95	1.94191	2.56402e-08
																																	-11.95	1.9668	9.85619e-09	-11.95	1.9668	1.25475e-07	-11.95	1.9668	1.6945e-08
																																	-11.95	1.9917	8.70507e-09	-11.95	1.9917	8.76437e-08	-11.95	1.9917	1.11e-08
																																	-11.95	2.0166	7.3895e-09	-11.95	2.0166	6.09623e-08	-11.95	2.0166	7.20749e-09
																																	-11.95	2.04149	6.08024e-09	-11.95	2.04149	4.22286e-08	-11.95	2.04149	4.64002e-09
																																	-11.95	2.06639	4.88016e-09	-11.95	2.06639	2.91332e-08	-11.95	2.06639	2.96325e-09
																																	-11.95	2.09129	3.83833e-09	-11.95	2.09129	2.00189e-08	-11.95	2.09129	1.87941e-09
																																	-11.95	2.11618	2.96821e-09	-11.95	2.11618	1.37026e-08	-11.95	2.11618	1.18628e-09
																																	-11.95	2.14108	2.26241e-09	-11.95	2.14108	9.34372e-09	-11.95	2.14108	7.47877e-10
																																	-11.95	2.16598	1.70294e-09	-11.95	2.16598	6.34795e-09	-11.95	2.16598	4.73563e-10
																																	-11.95	2.19087	1.2677e-09	-11.95	2.19087	4.29728e-09	-11.95	2.19087	3.03499e-10
																																	-11.95	2.21577	9.34385e-10	-11.95	2.21577	2.89903e-09	-11.95	2.21577	1.98559e-10
																																	-11.95	2.24066	6.82551e-10	-11.95	2.24066	1.94924e-09	-11.95	2.24066	1.33496e-10
																																	-11.95	2.26556	4.94508e-10	-11.95	2.26556	1.30644e-09	-11.95	2.26556	9.23853e-11
																																	-11.95	2.29046	3.55558e-10	-11.95	2.29046	8.72944e-10	-11.95	2.29046	6.55302e-11
																																	-11.95	2.31535	2.53846e-10	-11.95	2.31535	5.81583e-10	-11.95	2.31535	4.72658e-11
																																	-11.95	2.34025	1.80028e-10	-11.95	2.34025	3.86389e-10	-11.95	2.34025	3.43814e-11
																																	-11.95	2.36515	1.26877e-10	-11.95	2.36515	2.56024e-10	-11.95	2.36515	2.50552e-11
																																	-11.95	2.39004	8.8885e-11	-11.95	2.39004	1.69212e-10	-11.95	2.39004	1.82108e-11
																																	-11.95	2.41494	6.19151e-11	-11.95	2.41494	1.11564e-10	-11.95	2.41494	1.31661e-11
																																	-11.95	2.43983	4.2893e-11	-11.95	2.43983	7.33834e-11	-11.95	2.43983	9.45494e-12
																																	-11.95	2.46473	2.95588e-11	-11.95	2.46473	4.81596e-11	-11.95	2.46473	6.73977e-12
																																	-11.95	2.48963	2.02663e-11	-11.95	2.48963	3.15358e-11	-11.95	2.48963	4.76794e-12
																																	-11.95	2.51452	1.38266e-11	-11.95	2.51452	2.06051e-11	-11.95	2.51452	3.34764e-12
																																	-11.95	2.53942	9.38806e-12	-11.95	2.53942	1.34338e-11	-11.95	2.53942	2.33321e-12
																																	-11.95	2.56432	6.34464e-12	-11.95	2.56432	8.73927e-12	-11.95	2.56432	1.61469e-12
																																	-11.95	2.58921	4.26835e-12	-11.95	2.58921	5.67267e-12	-11.95	2.58921	1.10985e-12
																																	-11.95	2.61411	2.85877e-12	-11.95	2.61411	3.67383e-12	-11.95	2.61411	7.57882e-13
																																	-11.95	2.639	1.90637e-12	-11.95	2.639	2.3738e-12	-11.95	2.639	5.14308e-13
																																	-11.95	2.6639	1.26585e-12	-11.95	2.6639	1.53015e-12	-11.95	2.6639	3.4693e-13
																																	-11.95	2.6888	8.37023e-13	-11.95	2.6888	9.83909e-13	-11.95	2.6888	2.32682e-13
																																	-11.95	2.71369	5.51198e-13	-11.95	2.71369	6.31068e-13	-11.95	2.71369	1.55196e-13
																																	-11.95	2.73859	3.61511e-13	-11.95	2.73859	4.03704e-13	-11.95	2.73859	1.02965e-13
																																	-11.95	2.76349	2.3616e-13	-11.95	2.76349	2.57564e-13	-11.95	2.76349	6.79621e-14
																																	-11.95	2.78838	1.5367e-13	-11.95	2.78838	1.63874e-13	-11.95	2.78838	4.46364e-14
																																	-11.95	2.81328	9.96071e-14	-11.95	2.81328	1.03972e-13	-11.95	2.81328	2.91759e-14
																																	-11.95	2.83817	6.43182e-14	-11.95	2.83817	6.57771e-14	-11.95	2.83817	1.89817e-14
																																	-11.95	2.86307	4.13751e-14	-11.95	2.86307	4.14925e-14	-11.95	2.86307	1.22935e-14
																																	-11.95	2.88797	2.65169e-14	-11.95	2.88797	2.60966e-14	-11.95	2.88797	7.92685e-15
																																	-11.95	2.91286	1.69318e-14	-11.95	2.91286	1.63647e-14	-11.95	2.91286	5.08925e-15
																																	-11.95	2.93776	1.07719e-14	-11.95	2.93776	1.02313e-14	-11.95	2.93776	3.2537e-15
																																	-11.95	2.96266	6.82818e-15	-11.95	2.96266	6.3775e-15	-11.95	2.96266	2.07161e-15
																																	-11.95	2.98755	4.31274e-15	-11.95	2.98755	3.96337e-15	-11.95	2.98755	1.31365e-15
																																	-11.95	3.01245	2.71423e-15	-11.95	3.01245	2.45569e-15	-11.95	3.01245	8.29701e-16
																																	-11.95	3.03734	1.70215e-15	-11.95	3.03734	1.51699e-15	-11.95	3.03734	5.21988e-16
																																	-11.95	3.06224	1.06368e-15	-11.95	3.06224	9.34314e-16	-11.95	3.06224	3.27129e-16
																																	-11.95	3.08714	6.6236e-16	-11.95	3.08714	5.73737e-16	-11.95	3.08714	2.04229e-16
																																	-11.95	3.11203	4.11014e-16	-11.95	3.11203	3.51276e-16	-11.95	3.11203	1.27021e-16
																																	-11.95	3.13693	2.54157e-16	-11.95	3.13693	2.1444e-16	-11.95	3.13693	7.87053e-17
																																	-11.95	3.16183	1.56616e-16	-11.95	3.16183	1.30524e-16	-11.95	3.16183	4.85872e-17
																																	-11.95	3.18672	9.61754e-17	-11.95	3.18672	7.92154e-17	-11.95	3.18672	2.98839e-17
																																	-11.95	3.21162	5.88557e-17	-11.95	3.21162	4.79365e-17	-11.95	3.21162	1.83131e-17
																																	-11.95	3.23651	3.58933e-17	-11.95	3.23651	2.89245e-17	-11.95	3.23651	1.11817e-17
																																	-11.95	3.26141	2.18143e-17	-11.95	3.26141	1.74023e-17	-11.95	3.26141	6.8026e-18
																																	-11.95	3.28631	1.32122e-17	-11.95	3.28631	1.04399e-17	-11.95	3.28631	4.12359e-18
																																	-11.95	3.3112	7.97478e-18	-11.95	3.3112	6.2449e-18	-11.95	3.3112	2.49066e-18
																																	-11.95	3.3361	4.79703e-18	-11.95	3.3361	3.72475e-18	-11.95	3.3361	1.49898e-18
																																	-11.95	3.361	2.87566e-18	-11.95	3.361	2.21517e-18	-11.95	3.361	8.98932e-19
																																	-11.95	3.38589	1.71798e-18	-11.95	3.38589	1.31355e-18	-11.95	3.38589	5.37167e-19
																																	-11.95	3.41079	1.02285e-18	-11.95	3.41079	7.76632e-19	-11.95	3.41079	3.19851e-19
																																	-11.95	3.43568	6.0691e-19	-11.95	3.43568	4.57827e-19	-11.95	3.43568	1.89778e-19
																																	-11.95	3.46058	3.58883e-19	-11.95	3.46058	2.69089e-19	-11.95	3.46058	1.12203e-19
																																	-11.95	3.48548	2.11496e-19	-11.95	3.48548	1.57686e-19	-11.95	3.48548	6.61047e-20
																																	-11.95	3.51037	1.24214e-19	-11.95	3.51037	9.21251e-20	-11.95	3.51037	3.88085e-20
																																	-11.95	3.53527	7.27039e-20	-11.95	3.53527	5.36593e-20	-11.95	3.53527	2.27036e-20
																																	-11.95	3.56017	4.24098e-20	-11.95	3.56017	3.11589e-20	-11.95	3.56017	1.32354e-20
																																	-11.95	3.58506	2.46546e-20	-11.95	3.58506	1.80376e-20	-11.95	3.58506	7.68874e-21
																																	-11.95	3.60996	1.4284e-20	-11.95	3.60996	1.04094e-20	-11.95	3.60996	4.45097e-21
																																	-11.95	3.63485	8.24753e-21	-11.95	3.63485	5.9884e-21	-11.95	3.63485	2.56765e-21
																																	-11.95	3.65975	4.74592e-21	-11.95	3.65975	3.4342e-21	-11.95	3.65975	1.47606e-21
																																	-11.95	3.68465	2.72169e-21	-11.95	3.68465	1.96318e-21	-11.95	3.68465	8.45585e-22
																																	-11.95	3.70954	1.55554e-21	-11.95	3.70954	1.11868e-21	-11.95	3.70954	4.82727e-22
																																	-11.95	3.73444	8.8602e-22	-11.95	3.73444	6.35409e-22	-11.95	3.73444	2.74624e-22
																																	-11.95	3.75934	5.02954e-22	-11.95	3.75934	3.59745e-22	-11.95	3.75934	1.55693e-22
																																	-11.95	3.78423	2.84535e-22	-11.95	3.78423	2.03013e-22	-11.95	3.78423	8.79624e-23
																																	-11.95	3.80913	1.60422e-22	-11.95	3.80913	1.14191e-22	-11.95	3.80913	4.95248e-23
																																	-11.95	3.83403	9.01389e-23	-11.95	3.83403	6.40193e-23	-11.95	3.83403	2.77875e-23
																																	-11.95	3.85892	5.04756e-23	-11.95	3.85892	3.57732e-23	-11.95	3.85892	1.55374e-23
																																	-11.95	3.88382	2.8169e-23	-11.95	3.88382	1.99235e-23	-11.95	3.88382	8.65789e-24
																																	-11.95	3.90871	1.56668e-23	-11.95	3.90871	1.10594e-23	-11.95	3.90871	4.80785e-24
																																	-11.95	3.93361	8.68373e-24	-11.95	3.93361	6.11854e-24	-11.95	3.93361	2.6607e-24
																																	-11.95	3.95851	4.79679e-24	-11.95	3.95851	3.37374e-24	-11.95	3.95851	1.46741e-24
																																	-11.95	3.9834	2.64066e-24	-11.95	3.9834	1.85404e-24	-11.95	3.9834	8.06519e-25
																																	-11.95	4.0083	1.44874e-24	-11.95	4.0083	1.01547e-24	-11.95	4.0083	4.41763e-25
																																	-11.95	4.0332	7.92107e-25	-11.95	4.0332	5.5431e-25	-11.95	4.0332	2.41144e-25
																																	-11.95	4.05809	4.31611e-25	-11.95	4.05809	3.01559e-25	-11.95	4.05809	1.31182e-25
																																	-11.95	4.08299	2.34376e-25	-11.95	4.08299	1.63502e-25	-11.95	4.08299	7.11193e-26
																																	-11.95	4.10788	1.26838e-25	-11.95	4.10788	8.83493e-26	-11.95	4.10788	3.84251e-26
																																	-11.95	4.13278	6.84063e-26	-11.95	4.13278	4.75785e-26	-11.95	4.13278	2.06898e-26
																																	-11.95	4.15768	3.67667e-26	-11.95	4.15768	2.55354e-26	-11.95	4.15768	1.11023e-26
																																	-11.95	4.18257	1.96935e-26	-11.95	4.18257	1.36584e-26	-11.95	4.18257	5.93726e-27
																																	-11.95	4.20747	1.05124e-26	-11.95	4.20747	7.28077e-27	-11.95	4.20747	3.16428e-27
																																	-11.95	4.23236	5.59227e-27	-11.95	4.23236	3.86791e-27	-11.95	4.23236	1.68066e-27
																																	-11.95	4.25726	2.96472e-27	-11.95	4.25726	2.04783e-27	-11.95	4.25726	8.89617e-28
																																	-11.95	4.28216	1.56634e-27	-11.95	4.28216	1.08051e-27	-11.95	4.28216	4.69291e-28
																																	-11.95	4.30705	8.24697e-28	-11.95	4.30705	5.68173e-28	-11.95	4.30705	2.46717e-28
																																	-11.95	4.33195	4.32722e-28	-11.95	4.33195	2.97747e-28	-11.95	4.33195	1.29262e-28
																																	-11.95	4.35685	2.2627e-28	-11.95	4.35685	1.555e-28	-11.95	4.35685	6.74935e-29
																																	-11.95	4.38174	1.1791e-28	-11.95	4.38174	8.0933e-29	-11.95	4.38174	3.51212e-29
																																	-11.95	4.40664	6.1232e-29	-11.95	4.40664	4.19792e-29	-11.95	4.40664	1.82135e-29
																																	-11.95	4.43154	3.1689e-29	-11.95	4.43154	2.16997e-29	-11.95	4.43154	9.41316e-30
																																	-11.95	4.45643	1.63433e-29	-11.95	4.45643	1.11786e-29	-11.95	4.45643	4.84835e-30
																																	-11.95	4.48133	8.3999e-30	-11.95	4.48133	5.73889e-30	-11.95	4.48133	2.48868e-30
																																	-11.95	4.50622	4.30238e-30	-11.95	4.50622	2.93616e-30	-11.95	4.50622	1.2731e-30
																																	-11.95	4.53112	2.19606e-30	-11.95	4.53112	1.49707e-30	-11.95	4.53112	6.49037e-31
																																	-11.95	4.55602	1.11707e-30	-11.95	4.55602	7.60696e-31	-11.95	4.55602	3.29757e-31
																																	-11.95	4.58091	5.6626e-31	-11.95	4.58091	3.85203e-31	-11.95	4.58091	1.66969e-31
																																	-11.95	4.60581	2.86055e-31	-11.95	4.60581	1.9439e-31	-11.95	4.60581	8.42541e-32
																																	-11.95	4.6307	1.44007e-31	-11.95	4.6307	9.77615e-32	-11.95	4.6307	4.23705e-32
																																	-11.95	4.6556	7.22461e-32	-11.95	4.6556	4.89968e-32	-11.95	4.6556	2.12349e-32
																																	-11.95	4.6805	3.61197e-32	-11.95	4.6805	2.44722e-32	-11.95	4.6805	1.06061e-32
																																	-11.95	4.70539	1.79958e-32	-11.95	4.70539	1.21811e-32	-11.95	4.70539	5.27924e-33
																																	-11.95	4.73029	8.93501e-33	-11.95	4.73029	6.0423e-33	-11.95	4.73029	2.61881e-33
																																	-11.95	4.75519	4.42096e-33	-11.95	4.75519	2.98693e-33	-11.95	4.75519	1.29464e-33
																																	-11.95	4.78008	2.17989e-33	-11.95	4.78008	1.47147e-33	-11.95	4.78008	6.37839e-34
																																	-11.95	4.80498	1.07114e-33	-11.95	4.80498	7.2241e-34	-11.95	4.80498	3.13174e-34
																																	-11.95	4.82988	5.24516e-34	-11.95	4.82988	3.53444e-34	-11.95	4.82988	1.5324e-34
																																	-11.95	4.85477	2.55956e-34	-11.95	4.85477	1.7233e-34	-11.95	4.85477	7.47265e-35
																																	-11.95	4.87967	1.24471e-34	-11.95	4.87967	8.37344e-35	-11.95	4.87967	3.63152e-35
																																	-11.95	4.90456	6.03205e-35	-11.95	4.90456	4.05463e-35	-11.95	4.90456	1.7588e-35
																																	-11.95	4.92946	2.91312e-35	-11.95	4.92946	1.9566e-35	-11.95	4.92946	8.48896e-36
																																	-11.95	4.95436	1.402e-35	-11.95	4.95436	9.40928e-36	-11.95	4.95436	4.08324e-36
																																	-11.95	4.97925	6.72405e-36	-11.95	4.97925	4.50934e-36	-11.95	4.97925	1.95735e-36
																																	-11.95	5.00415	3.21373e-36	-11.95	5.00415	2.15364e-36	-11.95	5.00415	9.35064e-37
																																	-11.95	5.02905	1.53068e-36	-11.95	5.02905	1.02503e-36	-11.95	5.02905	4.4517e-37
																																	-11.95	5.05394	7.26528e-37	-11.95	5.05394	4.86183e-37	-11.95	5.05394	2.11213e-37
																																	-11.95	5.07884	3.4365e-37	-11.95	5.07884	2.29809e-37	-11.95	5.07884	9.9868e-38
																																	-11.95	5.10373	1.61985e-37	-11.95	5.10373	1.08252e-37	-11.95	5.10373	4.70589e-38
																																	-11.95	5.12863	7.60901e-38	-11.95	5.12863	5.08166e-38	-11.95	5.12863	2.20987e-38
																																	-11.95	5.15353	3.56186e-38	-11.95	5.15353	2.37727e-38	-11.95	5.15353	1.03419e-38
																																	-11.95	5.17842	1.66157e-38	-11.95	5.17842	1.10829e-38	-11.95	5.17842	4.82328e-39
																																	-11.95	5.20332	7.72425e-39	-11.95	5.20332	5.14906e-39	-11.95	5.20332	2.24178e-39
																																	-11.95	5.22822	3.5784e-39	-11.95	5.22822	2.38399e-39	-11.95	5.22822	1.03837e-39
																																	-11.95	5.25311	1.65202e-39	-11.95	5.25311	1.09997e-39	-11.95	5.25311	4.79312e-40
																																	-11.95	5.27801	7.60042e-40	-11.95	5.27801	5.0578e-40	-11.95	5.27801	2.20492e-40
																																	-11.95	5.30291	3.48461e-40	-11.95	5.30291	2.31761e-40	-11.95	5.30291	1.01082e-40
																																	-11.95	5.3278	1.59208e-40	-11.95	5.3278	1.05833e-40	-11.95	5.3278	4.61806e-41
																																	-11.95	5.3527	7.24888e-41	-11.95	5.3527	4.81618e-41	-11.95	5.3527	2.10258e-41
																																	-11.95	5.37759	3.28906e-41	-11.95	5.37759	2.18416e-41	-11.95	5.37759	9.54007e-42
																																	-11.95	5.40249	1.48719e-41	-11.95	5.40249	9.87112e-42	-11.95	5.40249	4.31375e-42
																																	-11.95	5.42739	6.70129e-42	-11.95	5.42739	4.44578e-42	-11.95	5.42739	1.94386e-42
																																	-11.95	5.45228	3.00915e-42	-11.95	5.45228	1.9954e-42	-11.95	5.45228	8.72926e-43
																																	-11.95	5.47718	1.34656e-42	-11.95	5.47718	8.92508e-43	-11.95	5.47718	3.90657e-43
																																	-11.95	5.50207	6.00482e-43	-11.95	5.50207	3.97826e-43	-11.95	5.50207	1.74227e-43
																																	-11.95	5.52697	2.66852e-43	-11.95	5.52697	1.76715e-43	-11.95	5.52697	7.74357e-44
																																	-11.95	5.55187	1.18178e-43	-11.95	5.55187	7.82266e-44	-11.95	5.55187	3.4298e-44
																																	-11.95	5.57676	5.21551e-44	-11.95	5.57676	3.45091e-44	-11.95	5.57676	1.5139e-44
																																	-11.95	5.60166	2.29379e-44	-11.95	5.60166	1.51709e-44	-11.95	5.60166	6.65934e-45
																																	-11.95	5.62656	1.00532e-44	-11.95	5.62656	6.64645e-45	-11.95	5.62656	2.91921e-45
																																	-11.95	5.65145	4.39087e-45	-11.95	5.65145	2.90179e-45	-11.95	5.65145	1.27527e-45
																																	-11.95	5.67635	1.91114e-45	-11.95	5.67635	1.26252e-45	-11.95	5.67635	5.55184e-46
																																	-11.95	5.70125	8.28951e-46	-11.95	5.70125	5.4741e-46	-11.95	5.70125	2.40865e-46
																																	-11.95	5.72614	3.58312e-46	-11.95	5.72614	2.36529e-46	-11.95	5.72614	1.04139e-46
																																	-11.95	5.75104	1.54344e-46	-11.95	5.75104	1.01848e-46	-11.95	5.75104	4.48694e-47
																																	-11.95	5.77593	6.6254e-47	-11.95	5.77593	4.37038e-47	-11.95	5.77593	1.92658e-47
																																	-11.95	5.80083	2.8342e-47	-11.95	5.80083	1.86889e-47	-11.95	5.80083	8.24373e-48
																																	-11.95	5.82573	1.20821e-47	-11.95	5.82573	7.96426e-48	-11.95	5.82573	3.51528e-48
																																	-11.95	5.85062	5.13279e-48	-11.95	5.85062	3.38224e-48	-11.95	5.85062	1.4938e-48
																																	-11.95	5.87552	2.17299e-48	-11.95	5.87552	1.4314e-48	-11.95	5.87552	6.32595e-49
																																	-11.95	5.90041	9.16765e-49	-11.95	5.90041	6.0369e-49	-11.95	5.90041	2.66966e-49
																																	-11.95	5.92531	3.85437e-49	-11.95	5.92531	2.53725e-49	-11.95	5.92531	1.12275e-49
																																	-11.95	5.95021	1.6149e-49	-11.95	5.95021	1.0627e-49	-11.95	5.95021	4.70554e-50
																																	-11.95	5.9751	6.74265e-50	-11.95	5.9751	4.4356e-50	-11.95	5.9751	1.96531e-50
																																	-11.95	6	2.80551e-50	-11.95	6	1.84498e-50	-11.95	6	8.17996e-51
																																	-11.9	0	0.01272	-11.9	0	0.02524	-11.9	0	0.00571
																																	-11.9	0.0249	0.02815	-11.9	0.0249	0.0559	-11.9	0.0249	0.01261
																																	-11.9	0.04979	0.03881	-11.9	0.04979	0.07733	-11.9	0.04979	0.01728
																																	-11.9	0.07469	0.04565	-11.9	0.07469	0.09147	-11.9	0.07469	0.02012
																																	-11.9	0.09959	0.05	-11.9	0.09959	0.10094	-11.9	0.09959	0.02178
																																	-11.9	0.12448	0.05249	-11.9	0.12448	0.10699	-11.9	0.12448	0.02264
																																	-11.9	0.14938	0.05352	-11.9	0.14938	0.11042	-11.9	0.14938	0.02297
																																	-11.9	0.17427	0.0533	-11.9	0.17427	0.11173	-11.9	0.17427	0.02295
																																	-11.9	0.19917	0.05195	-11.9	0.19917	0.11123	-11.9	0.19917	0.02264
																																	-11.9	0.22407	0.04949	-11.9	0.22407	0.10913	-11.9	0.22407	0.02204
																																	-11.9	0.24896	0.04602	-11.9	0.24896	0.10569	-11.9	0.24896	0.02113
																																	-11.9	0.27386	0.04171	-11.9	0.27386	0.10121	-11.9	0.27386	0.01989
																																	-11.9	0.29875	0.03688	-11.9	0.29875	0.09609	-11.9	0.29875	0.01841
																																	-11.9	0.32365	0.03189	-11.9	0.32365	0.09067	-11.9	0.32365	0.01678
																																	-11.9	0.34855	0.02713	-11.9	0.34855	0.0852	-11.9	0.34855	0.01513
																																	-11.9	0.37344	0.02288	-11.9	0.37344	0.07989	-11.9	0.37344	0.01356
																																	-11.9	0.39834	0.01921	-11.9	0.39834	0.07504	-11.9	0.39834	0.01212
																																	-11.9	0.42324	0.01603	-11.9	0.42324	0.07117	-11.9	0.42324	0.01082
																																	-11.9	0.44813	0.01313	-11.9	0.44813	0.06904	-11.9	0.44813	0.00972
																																	-11.9	0.47303	0.01034	-11.9	0.47303	0.06927	-11.9	0.47303	0.00892
																																	-11.9	0.49793	0.00761	-11.9	0.49793	0.0719	-11.9	0.49793	0.00858
																																	-11.9	0.52282	0.00506	-11.9	0.52282	0.07622	-11.9	0.52282	0.00874
																																	-11.9	0.54772	0.0031	-11.9	0.54772	0.08104	-11.9	0.54772	0.00932
																																	-11.9	0.57261	0.00268	-11.9	0.57261	0.08517	-11.9	0.57261	0.01008
																																	-11.9	0.59751	0.00367	-11.9	0.59751	0.08767	-11.9	0.59751	0.01079
																																	-11.9	0.62241	0.00478	-11.9	0.62241	0.088	-11.9	0.62241	0.01128
																																	-11.9	0.6473	0.00558	-11.9	0.6473	0.08598	-11.9	0.6473	0.01146
																																	-11.9	0.6722	0.00598	-11.9	0.6722	0.08175	-11.9	0.6722	0.0113
																																	-11.9	0.6971	0.00603	-11.9	0.6971	0.07568	-11.9	0.6971	0.01081
																																	-11.9	0.72199	0.0058	-11.9	0.72199	0.06827	-11.9	0.72199	0.01007
																																	-11.9	0.74689	0.0054	-11.9	0.74689	0.06009	-11.9	0.74689	0.00914
																																	-11.9	0.77178	0.0049	-11.9	0.77178	0.05165	-11.9	0.77178	0.0081
																																	-11.9	0.79668	0.00437	-11.9	0.79668	0.04343	-11.9	0.79668	0.00702
																																	-11.9	0.82158	0.00386	-11.9	0.82158	0.03577	-11.9	0.82158	0.00598
																																	-11.9	0.84647	0.00339	-11.9	0.84647	0.02892	-11.9	0.84647	0.005
																																	-11.9	0.87137	0.00296	-11.9	0.87137	0.02299	-11.9	0.87137	0.00414
																																	-11.9	0.89627	0.00257	-11.9	0.89627	0.01803	-11.9	0.89627	0.00339
																																	-11.9	0.92116	0.00222	-11.9	0.92116	0.01398	-11.9	0.92116	0.00275
																																	-11.9	0.94606	0.00191	-11.9	0.94606	0.01078	-11.9	0.94606	0.00223
																																	-11.9	0.97095	0.00163	-11.9	0.97095	0.00828	-11.9	0.97095	0.00181
																																	-11.9	0.99585	0.00138	-11.9	0.99585	0.00638	-11.9	0.99585	0.00147
																																	-11.9	1.02075	0.00115	-11.9	1.02075	0.00495	-11.9	1.02075	0.0012
																																	-11.9	1.04564	0.000957638	-11.9	1.04564	0.00387	-11.9	1.04564	0.000980725
																																	-11.9	1.07054	0.000786919	-11.9	1.07054	0.00306	-11.9	1.07054	0.000801469
																																	-11.9	1.09544	0.000640335	-11.9	1.09544	0.00244	-11.9	1.09544	0.00065421
																																	-11.9	1.12033	0.000515949	-11.9	1.12033	0.00196	-11.9	1.12033	0.000532386
																																	-11.9	1.14523	0.000411635	-11.9	1.14523	0.00158	-11.9	1.14523	0.00043122
																																	-11.9	1.17012	0.000325192	-11.9	1.17012	0.00127	-11.9	1.17012	0.000347197
																																	-11.9	1.19502	0.000254423	-11.9	1.19502	0.00103	-11.9	1.19502	0.000277629
																																	-11.9	1.21992	0.000197205	-11.9	1.21992	0.000824538	-11.9	1.21992	0.000220366
																																	-11.9	1.24481	0.000151528	-11.9	1.24481	0.000659522	-11.9	1.24481	0.000173596
																																	-11.9	1.26971	0.000115531	-11.9	1.26971	0.000524818	-11.9	1.26971	0.000135741
																																	-11.9	1.29461	8.75195e-05	-11.9	1.29461	0.000415325	-11.9	1.29461	0.000105401
																																	-11.9	1.3195	6.59826e-05	-11.9	1.3195	0.000326839	-11.9	1.3195	8.13239e-05
																																	-11.9	1.3444	4.96006e-05	-11.9	1.3444	0.000255799	-11.9	1.3444	6.24024e-05
																																	-11.9	1.36929	3.72468e-05	-11.9	1.36929	0.000199156	-11.9	1.36929	4.76655e-05
																																	-11.9	1.39419	2.79832e-05	-11.9	1.39419	0.000154294	-11.9	1.39419	3.62781e-05
																																	-11.9	1.41909	2.1051e-05	-11.9	1.41909	0.000118987	-11.9	1.41909	2.75355e-05
																																	-11.9	1.44398	1.58553e-05	-11.9	1.44398	9.13641e-05	-11.9	1.44398	2.08557e-05
																																	-11.9	1.46888	1.19437e-05	-11.9	1.46888	6.98675e-05	-11.9	1.46888	1.57681e-05
																																	-11.9	1.49378	8.9818e-06	-11.9	1.49378	5.32197e-05	-11.9	1.49378	1.19001e-05
																																	-11.9	1.51867	6.72729e-06	-11.9	1.51867	4.03841e-05	-11.9	1.51867	8.96139e-06
																																	-11.9	1.54357	5.00608e-06	-11.9	1.54357	3.05285e-05	-11.9	1.54357	6.72952e-06
																																	-11.9	1.56847	3.69229e-06	-11.9	1.56847	2.29905e-05	-11.9	1.56847	5.03535e-06
																																	-11.9	1.59336	2.69318e-06	-11.9	1.59336	1.72471e-05	-11.9	1.59336	3.75092e-06
																																	-11.9	1.61826	1.93868e-06	-11.9	1.61826	1.28875e-05	-11.9	1.61826	2.77936e-06
																																	-11.9	1.64315	1.37449e-06	-11.9	1.64315	9.59113e-06	-11.9	1.64315	2.04703e-06
																																	-11.9	1.66805	9.57776e-07	-11.9	1.66805	7.10841e-06	-11.9	1.66805	1.49761e-06
																																	-11.9	1.69295	6.54364e-07	-11.9	1.69295	5.24611e-06	-11.9	1.69295	1.08779e-06
																																	-11.9	1.71784	4.3702e-07	-11.9	1.71784	3.85506e-06	-11.9	1.71784	7.84133e-07
																																	-11.9	1.74274	2.84159e-07	-11.9	1.74274	2.82051e-06	-11.9	1.74274	5.60802e-07
																																	-11.9	1.76764	1.78881e-07	-11.9	1.76764	2.05449e-06	-11.9	1.76764	3.97844e-07
																																	-11.9	1.79253	1.08165e-07	-11.9	1.79253	1.48988e-06	-11.9	1.79253	2.79921e-07
																																	-11.9	1.81743	6.21972e-08	-11.9	1.81743	1.07563e-06	-11.9	1.81743	1.95313e-07
																																	-11.9	1.84232	3.38525e-08	-11.9	1.84232	7.73108e-07	-11.9	1.84232	1.35134e-07
																																	-11.9	1.86722	1.83613e-08	-11.9	1.86722	5.53208e-07	-11.9	1.86722	9.2705e-08
																																	-11.9	1.89212	1.24475e-08	-11.9	1.89212	3.94111e-07	-11.9	1.89212	6.30546e-08
																																	-11.9	1.91701	1.15197e-08	-11.9	1.91701	2.79541e-07	-11.9	1.91701	4.25178e-08
																																	-11.9	1.94191	1.13236e-08	-11.9	1.94191	1.97418e-07	-11.9	1.94191	2.84202e-08
																																	-11.9	1.9668	1.06217e-08	-11.9	1.9668	1.38824e-07	-11.9	1.9668	1.883e-08
																																	-11.9	1.9917	9.45905e-09	-11.9	1.9917	9.72074e-08	-11.9	1.9917	1.23655e-08
																																	-11.9	2.0166	8.08041e-09	-11.9	2.0166	6.77826e-08	-11.9	2.0166	8.04858e-09
																																	-11.9	2.04149	6.68316e-09	-11.9	2.04149	4.70707e-08	-11.9	2.04149	5.19332e-09
																																	-11.9	2.06639	5.38805e-09	-11.9	2.06639	3.25557e-08	-11.9	2.06639	3.32349e-09
																																	-11.9	2.09129	4.25479e-09	-11.9	2.09129	2.24276e-08	-11.9	2.09129	2.11158e-09
																																	-11.9	2.11618	3.30245e-09	-11.9	2.11618	1.53906e-08	-11.9	2.11618	1.33454e-09
																																	-11.9	2.14108	2.52599e-09	-11.9	2.14108	1.05218e-08	-11.9	2.14108	8.4188e-10
																																	-11.9	2.16598	1.90771e-09	-11.9	2.16598	7.16679e-09	-11.9	2.16598	5.33003e-10
																																	-11.9	2.19087	1.42475e-09	-11.9	2.19087	4.86422e-09	-11.9	2.19087	3.41276e-10
																																	-11.9	2.21577	1.05349e-09	-11.9	2.21577	3.29009e-09	-11.9	2.21577	2.22971e-10
																																	-11.9	2.24066	7.71963e-10	-11.9	2.24066	2.218e-09	-11.9	2.24066	1.49746e-10
																																	-11.9	2.26556	5.61019e-10	-11.9	2.26556	1.4905e-09	-11.9	2.26556	1.03625e-10
																																	-11.9	2.29046	4.04621e-10	-11.9	2.29046	9.98576e-10	-11.9	2.29046	7.36011e-11
																																	-11.9	2.31535	2.89759e-10	-11.9	2.31535	6.6706e-10	-11.9	2.31535	5.32255e-11
																																	-11.9	2.34025	2.06126e-10	-11.9	2.34025	4.44369e-10	-11.9	2.34025	3.8851e-11
																																	-11.9	2.36515	1.45714e-10	-11.9	2.36515	2.95238e-10	-11.9	2.36515	2.84242e-11
																																	-11.9	2.39004	1.02394e-10	-11.9	2.39004	1.95661e-10	-11.9	2.39004	2.07451e-11
																																	-11.9	2.41494	7.15444e-11	-11.9	2.41494	1.29356e-10	-11.9	2.41494	1.50609e-11
																																	-11.9	2.43983	4.97167e-11	-11.9	2.43983	8.53223e-11	-11.9	2.43983	1.08602e-11
																																	-11.9	2.46473	3.43673e-11	-11.9	2.46473	5.61515e-11	-11.9	2.46473	7.77278e-12
																																	-11.9	2.48963	2.36364e-11	-11.9	2.48963	3.68731e-11	-11.9	2.48963	5.52047e-12
																																	-11.9	2.51452	1.61764e-11	-11.9	2.51452	2.41613e-11	-11.9	2.51452	3.89102e-12
																																	-11.9	2.53942	1.10181e-11	-11.9	2.53942	1.5798e-11	-11.9	2.53942	2.72225e-12
																																	-11.9	2.56432	7.46979e-12	-11.9	2.56432	1.03074e-11	-11.9	2.56432	1.89096e-12
																																	-11.9	2.58921	5.0413e-12	-11.9	2.58921	6.71046e-12	-11.9	2.58921	1.30454e-12
																																	-11.9	2.61411	3.38729e-12	-11.9	2.61411	4.35905e-12	-11.9	2.61411	8.94089e-13
																																	-11.9	2.639	2.2661e-12	-11.9	2.639	2.82515e-12	-11.9	2.639	6.08939e-13
																																	-11.9	2.6639	1.5096e-12	-11.9	2.6639	1.82673e-12	-11.9	2.6639	4.12242e-13
																																	-11.9	2.6888	1.00147e-12	-11.9	2.6888	1.17831e-12	-11.9	2.6888	2.77476e-13
																																	-11.9	2.71369	6.61661e-13	-11.9	2.71369	7.58158e-13	-11.9	2.71369	1.85735e-13
																																	-11.9	2.73859	4.354e-13	-11.9	2.73859	4.86569e-13	-11.9	2.73859	1.23665e-13
																																	-11.9	2.76349	2.85379e-13	-11.9	2.76349	3.11443e-13	-11.9	2.76349	8.19159e-14
																																	-11.9	2.78838	1.86322e-13	-11.9	2.78838	1.98808e-13	-11.9	2.78838	5.39928e-14
																																	-11.9	2.81328	1.21182e-13	-11.9	2.81328	1.26556e-13	-11.9	2.81328	3.54175e-14
																																	-11.9	2.83817	7.85166e-14	-11.9	2.83817	8.03346e-14	-11.9	2.83817	2.31248e-14
																																	-11.9	2.86307	5.06826e-14	-11.9	2.86307	5.08476e-14	-11.9	2.86307	1.50306e-14
																																	-11.9	2.88797	3.25947e-14	-11.9	2.88797	3.20901e-14	-11.9	2.88797	9.72657e-15
																																	-11.9	2.91286	2.08853e-14	-11.9	2.91286	2.01926e-14	-11.9	2.91286	6.26728e-15
																																	-11.9	2.93776	1.33339e-14	-11.9	2.93776	1.26686e-14	-11.9	2.93776	4.02139e-15
																																	-11.9	2.96266	8.48222e-15	-11.9	2.96266	7.92445e-15	-11.9	2.96266	2.56973e-15
																																	-11.9	2.98755	5.37661e-15	-11.9	2.98755	4.94216e-15	-11.9	2.98755	1.63549e-15
																																	-11.9	3.01245	3.39598e-15	-11.9	3.01245	3.07306e-15	-11.9	3.01245	1.03678e-15
																																	-11.9	3.03734	2.13742e-15	-11.9	3.03734	1.90517e-15	-11.9	3.03734	6.54688e-16
																																	-11.9	3.06224	1.34057e-15	-11.9	3.06224	1.17764e-15	-11.9	3.06224	4.11823e-16
																																	-11.9	3.08714	8.37865e-16	-11.9	3.08714	7.25788e-16	-11.9	3.08714	2.5807e-16
																																	-11.9	3.11203	5.21853e-16	-11.9	3.11203	4.45999e-16	-11.9	3.11203	1.61114e-16
																																	-11.9	3.13693	3.23906e-16	-11.9	3.13693	2.73269e-16	-11.9	3.13693	1.0021e-16
																																	-11.9	3.16183	2.00351e-16	-11.9	3.16183	1.6695e-16	-11.9	3.16183	6.20998e-17
																																	-11.9	3.18672	1.235e-16	-11.9	3.18672	1.01702e-16	-11.9	3.18672	3.83424e-17
																																	-11.9	3.21162	7.58673e-17	-11.9	3.21162	6.1776e-17	-11.9	3.21162	2.35878e-17
																																	-11.9	3.23651	4.64467e-17	-11.9	3.23651	3.74167e-17	-11.9	3.23651	1.44586e-17
																																	-11.9	3.26141	2.83381e-17	-11.9	3.26141	2.25979e-17	-11.9	3.26141	8.83087e-18
																																	-11.9	3.28631	1.72308e-17	-11.9	3.28631	1.36091e-17	-11.9	3.28631	5.37433e-18
																																	-11.9	3.3112	1.04415e-17	-11.9	3.3112	8.17231e-18	-11.9	3.3112	3.25908e-18
																																	-11.9	3.3361	6.30583e-18	-11.9	3.3361	4.89347e-18	-11.9	3.3361	1.96934e-18
																																	-11.9	3.361	3.79531e-18	-11.9	3.361	2.92173e-18	-11.9	3.361	1.18579e-18
																																	-11.9	3.38589	2.27656e-18	-11.9	3.38589	1.73944e-18	-11.9	3.38589	7.11475e-19
																																	-11.9	3.41079	1.36094e-18	-11.9	3.41079	1.03257e-18	-11.9	3.41079	4.25382e-19
																																	-11.9	3.43568	8.10825e-19	-11.9	3.43568	6.11173e-19	-11.9	3.43568	2.53437e-19
																																	-11.9	3.46058	4.81445e-19	-11.9	3.46058	3.60688e-19	-11.9	3.46058	1.50465e-19
																																	-11.9	3.48548	2.84904e-19	-11.9	3.48548	2.12234e-19	-11.9	3.48548	8.90185e-20
																																	-11.9	3.51037	1.68028e-19	-11.9	3.51037	1.2451e-19	-11.9	3.51037	5.24814e-20
																																	-11.9	3.53527	9.87641e-20	-11.9	3.53527	7.28262e-20	-11.9	3.53527	3.0833e-20
																																	-11.9	3.56017	5.78562e-20	-11.9	3.56017	4.24675e-20	-11.9	3.56017	1.80514e-20
																																	-11.9	3.58506	3.37781e-20	-11.9	3.58506	2.46888e-20	-11.9	3.58506	1.05317e-20
																																	-11.9	3.60996	1.96542e-20	-11.9	3.60996	1.4309e-20	-11.9	3.60996	6.12316e-21
																																	-11.9	3.63485	1.13975e-20	-11.9	3.63485	8.26743e-21	-11.9	3.63485	3.54772e-21
																																	-11.9	3.65975	6.58717e-21	-11.9	3.65975	4.76186e-21	-11.9	3.65975	2.04842e-21
																																	-11.9	3.68465	3.79423e-21	-11.9	3.68465	2.73412e-21	-11.9	3.68465	1.17866e-21
																																	-11.9	3.70954	2.17813e-21	-11.9	3.70954	1.56488e-21	-11.9	3.70954	6.75869e-22
																																	-11.9	3.73444	1.24618e-21	-11.9	3.73444	8.9282e-22	-11.9	3.73444	3.86224e-22
																																	-11.9	3.75934	7.10575e-22	-11.9	3.75934	5.07754e-22	-11.9	3.75934	2.1995e-22
																																	-11.9	3.78423	4.03808e-22	-11.9	3.78423	2.87835e-22	-11.9	3.78423	1.24829e-22
																																	-11.9	3.80913	2.28704e-22	-11.9	3.80913	1.6264e-22	-11.9	3.80913	7.06025e-23
																																	-11.9	3.83403	1.29094e-22	-11.9	3.83403	9.16003e-23	-11.9	3.83403	3.97958e-23
																																	-11.9	3.85892	7.26228e-23	-11.9	3.85892	5.14218e-23	-11.9	3.85892	2.23547e-23
																																	-11.9	3.88382	4.07166e-23	-11.9	3.88382	2.87722e-23	-11.9	3.88382	1.25146e-23
																																	-11.9	3.90871	2.27511e-23	-11.9	3.90871	1.6046e-23	-11.9	3.90871	6.98203e-24
																																	-11.9	3.93361	1.26697e-23	-11.9	3.93361	8.91923e-24	-11.9	3.93361	3.8821e-24
																																	-11.9	3.95851	7.03168e-24	-11.9	3.95851	4.94138e-24	-11.9	3.95851	2.15116e-24
																																	-11.9	3.9834	3.8894e-24	-11.9	3.9834	2.72851e-24	-11.9	3.9834	1.18796e-24
																																	-11.9	4.0083	2.14405e-24	-11.9	4.0083	1.50161e-24	-11.9	4.0083	6.53813e-25
																																	-11.9	4.0332	1.17792e-24	-11.9	4.0332	8.2364e-25	-11.9	4.0332	3.58616e-25
																																	-11.9	4.05809	6.4495e-25	-11.9	4.05809	4.50262e-25	-11.9	4.05809	1.96034e-25
																																	-11.9	4.08299	3.51935e-25	-11.9	4.08299	2.45323e-25	-11.9	4.08299	1.06797e-25
																																	-11.9	4.10788	1.91392e-25	-11.9	4.10788	1.33215e-25	-11.9	4.10788	5.79846e-26
																																	-11.9	4.13278	1.03732e-25	-11.9	4.13278	7.20956e-26	-11.9	4.13278	3.13758e-26
																																	-11.9	4.15768	5.60302e-26	-11.9	4.15768	3.88868e-26	-11.9	4.15768	1.69201e-26
																																	-11.9	4.18257	3.01618e-26	-11.9	4.18257	2.09041e-26	-11.9	4.18257	9.09373e-27
																																	-11.9	4.20747	1.61813e-26	-11.9	4.20747	1.11994e-26	-11.9	4.20747	4.8709e-27
																																	-11.9	4.23236	8.65153e-27	-11.9	4.23236	5.97988e-27	-11.9	4.23236	2.60019e-27
																																	-11.9	4.25726	4.60991e-27	-11.9	4.25726	3.18216e-27	-11.9	4.25726	1.38335e-27
																																	-11.9	4.28216	2.44801e-27	-11.9	4.28216	1.68765e-27	-11.9	4.28216	7.33476e-28
																																	-11.9	4.30705	1.29554e-27	-11.9	4.30705	8.92012e-28	-11.9	4.30705	3.87589e-28
																																	-11.9	4.33195	6.83298e-28	-11.9	4.33195	4.69881e-28	-11.9	4.33195	2.0412e-28
																																	-11.9	4.35685	3.59158e-28	-11.9	4.35685	2.46679e-28	-11.9	4.35685	1.07135e-28
																																	-11.9	4.38174	1.88139e-28	-11.9	4.38174	1.29064e-28	-11.9	4.38174	5.60408e-29
																																	-11.9	4.40664	9.82174e-29	-11.9	4.40664	6.72977e-29	-11.9	4.40664	2.92152e-29
																																	-11.9	4.43154	5.10991e-29	-11.9	4.43154	3.49721e-29	-11.9	4.43154	1.5179e-29
																																	-11.9	4.45643	2.64944e-29	-11.9	4.45643	1.8112e-29	-11.9	4.45643	7.85971e-30
																																	-11.9	4.48133	1.36902e-29	-11.9	4.48133	9.34835e-30	-11.9	4.48133	4.05601e-30
																																	-11.9	4.50622	7.04982e-30	-11.9	4.50622	4.80868e-30	-11.9	4.50622	2.08604e-30
																																	-11.9	4.53112	3.61793e-30	-11.9	4.53112	2.46512e-30	-11.9	4.53112	1.06924e-30
																																	-11.9	4.55602	1.85036e-30	-11.9	4.55602	1.25943e-30	-11.9	4.55602	5.46204e-31
																																	-11.9	4.58091	9.43113e-31	-11.9	4.58091	6.41251e-31	-11.9	4.58091	2.78076e-31
																																	-11.9	4.60581	4.79053e-31	-11.9	4.60581	3.25389e-31	-11.9	4.60581	1.41092e-31
																																	-11.9	4.6307	2.42502e-31	-11.9	4.6307	1.6455e-31	-11.9	4.6307	7.13459e-32
																																	-11.9	4.6556	1.22337e-31	-11.9	4.6556	8.29303e-32	-11.9	4.6556	3.59554e-32
																																	-11.9	4.6805	6.1505e-32	-11.9	4.6805	4.1653e-32	-11.9	4.6805	1.80587e-32
																																	-11.9	4.70539	3.08158e-32	-11.9	4.70539	2.08496e-32	-11.9	4.70539	9.03935e-33
																																	-11.9	4.73029	1.53868e-32	-11.9	4.73029	1.04009e-32	-11.9	4.73029	4.50936e-33
																																	-11.9	4.75519	7.65651e-33	-11.9	4.75519	5.17079e-33	-11.9	4.75519	2.24192e-33
																																	-11.9	4.78008	3.79685e-33	-11.9	4.78008	2.5619e-33	-11.9	4.78008	1.11084e-33
																																	-11.9	4.80498	1.8764e-33	-11.9	4.80498	1.26499e-33	-11.9	4.80498	5.48543e-34
																																	-11.9	4.82988	9.24138e-34	-11.9	4.82988	6.2248e-34	-11.9	4.82988	2.69957e-34
																																	-11.9	4.85477	4.53583e-34	-11.9	4.85477	3.05269e-34	-11.9	4.85477	1.32405e-34
																																	-11.9	4.87967	2.21863e-34	-11.9	4.87967	1.49195e-34	-11.9	4.87967	6.47205e-35
																																	-11.9	4.90456	1.08149e-34	-11.9	4.90456	7.26682e-35	-11.9	4.90456	3.15285e-35
																																	-11.9	4.92946	5.25372e-35	-11.9	4.92946	3.52736e-35	-11.9	4.92946	1.5307e-35
																																	-11.9	4.95436	2.54343e-35	-11.9	4.95436	1.70636e-35	-11.9	4.95436	7.40632e-36
																																	-11.9	4.97925	1.2271e-35	-11.9	4.97925	8.22635e-36	-11.9	4.97925	3.5714e-36
																																	-11.9	5.00415	5.89996e-36	-11.9	5.00415	3.95238e-36	-11.9	5.00415	1.71632e-36
																																	-11.9	5.02905	2.827e-36	-11.9	5.02905	1.89246e-36	-11.9	5.02905	8.22019e-37
																																	-11.9	5.05394	1.34993e-36	-11.9	5.05394	9.03043e-37	-11.9	5.05394	3.92364e-37
																																	-11.9	5.07884	6.42394e-37	-11.9	5.07884	4.29443e-37	-11.9	5.07884	1.86646e-37
																																	-11.9	5.10373	3.0465e-37	-11.9	5.10373	2.03525e-37	-11.9	5.10373	8.84854e-38
																																	-11.9	5.12863	1.43982e-37	-11.9	5.12863	9.61266e-38	-11.9	5.12863	4.18067e-38
																																	-11.9	5.15353	6.78144e-38	-11.9	5.15353	4.52465e-38	-11.9	5.15353	1.96854e-38
																																	-11.9	5.17842	3.18305e-38	-11.9	5.17842	2.12246e-38	-11.9	5.17842	9.23765e-39
																																	-11.9	5.20332	1.48892e-38	-11.9	5.20332	9.92222e-39	-11.9	5.20332	4.32018e-39
																																	-11.9	5.22822	6.94079e-39	-11.9	5.22822	4.62266e-39	-11.9	5.22822	2.01355e-39
																																	-11.9	5.25311	3.22443e-39	-11.9	5.25311	2.14629e-39	-11.9	5.25311	9.35282e-40
																																	-11.9	5.27801	1.49281e-39	-11.9	5.27801	9.93116e-40	-11.9	5.27801	4.32956e-40
																																	-11.9	5.30291	6.88753e-40	-11.9	5.30291	4.57956e-40	-11.9	5.30291	1.9974e-40
																																	-11.9	5.3278	3.16686e-40	-11.9	5.3278	2.10456e-40	-11.9	5.3278	9.18341e-41
																																	-11.9	5.3527	1.45112e-40	-11.9	5.3527	9.63857e-41	-11.9	5.3527	4.20787e-41
																																	-11.9	5.37759	6.62651e-41	-11.9	5.37759	4.39923e-41	-11.9	5.37759	1.9215e-41
																																	-11.9	5.40249	3.0156e-41	-11.9	5.40249	2.00103e-41	-11.9	5.40249	8.74451e-42
																																	-11.9	5.42739	1.36763e-41	-11.9	5.42739	9.07076e-42	-11.9	5.42739	3.96596e-42
																																	-11.9	5.45228	6.18122e-42	-11.9	5.45228	4.09776e-42	-11.9	5.45228	1.79258e-42
																																	-11.9	5.47718	2.7841e-42	-11.9	5.47718	1.84485e-42	-11.9	5.47718	8.0747e-43
																																	-11.9	5.50207	1.2497e-42	-11.9	5.50207	8.27731e-43	-11.9	5.50207	3.62485e-43
																																	-11.9	5.52697	5.59026e-43	-11.9	5.52697	3.70108e-43	-11.9	5.52697	1.6217e-43
																																	-11.9	5.55187	2.49211e-43	-11.9	5.55187	1.64923e-43	-11.9	5.55187	7.23046e-44
																																	-11.9	5.57676	1.10716e-43	-11.9	5.57676	7.32393e-44	-11.9	5.57676	3.21275e-44
																																	-11.9	5.60166	4.90186e-44	-11.9	5.60166	3.2413e-44	-11.9	5.60166	1.42267e-44
																																	-11.9	5.62656	2.16281e-44	-11.9	5.62656	1.42957e-44	-11.9	5.62656	6.27834e-45
																																	-11.9	5.65145	9.51011e-45	-11.9	5.65145	6.28354e-45	-11.9	5.65145	2.76121e-45
																																	-11.9	5.67635	4.16735e-45	-11.9	5.67635	2.75242e-45	-11.9	5.67635	1.21023e-45
																																	-11.9	5.70125	1.81988e-45	-11.9	5.70125	1.20153e-45	-11.9	5.70125	5.2863e-46
																																	-11.9	5.72614	7.92014e-46	-11.9	5.72614	5.22717e-46	-11.9	5.72614	2.30116e-46
																																	-11.9	5.75104	3.43504e-46	-11.9	5.75104	2.26625e-46	-11.9	5.75104	9.98289e-47
																																	-11.9	5.77593	1.4847e-46	-11.9	5.77593	9.79177e-47	-11.9	5.77593	4.31596e-47
																																	-11.9	5.80083	6.39518e-47	-11.9	5.80083	4.21623e-47	-11.9	5.80083	1.85956e-47
																																	-11.9	5.82573	2.74521e-47	-11.9	5.82573	1.80925e-47	-11.9	5.82573	7.98465e-48
																																	-11.9	5.85062	1.17437e-47	-11.9	5.85062	7.73715e-48	-11.9	5.85062	3.41674e-48
																																	-11.9	5.87552	5.00663e-48	-11.9	5.87552	3.29742e-48	-11.9	5.87552	1.45707e-48
																																	-11.9	5.90041	2.12712e-48	-11.9	5.90041	1.40048e-48	-11.9	5.90041	6.19239e-49
																																	-11.9	5.92531	9.00634e-49	-11.9	5.92531	5.92774e-49	-11.9	5.92531	2.62269e-49
																																	-11.9	5.95021	3.80025e-49	-11.9	5.95021	2.50041e-49	-11.9	5.95021	1.107e-49
																																	-11.9	5.9751	1.59802e-49	-11.9	5.9751	1.05109e-49	-11.9	5.9751	4.65644e-50
																																	-11.9	6	6.69674e-50	-11.9	6	4.40333e-50	-11.9	6	1.95197e-50
																																	-11.85	0	0.01272	-11.85	0	0.02524	-11.85	0	0.00571
																																	-11.85	0.0249	0.02815	-11.85	0.0249	0.05591	-11.85	0.0249	0.01261
																																	-11.85	0.04979	0.03881	-11.85	0.04979	0.07734	-11.85	0.04979	0.01728
																																	-11.85	0.07469	0.04566	-11.85	0.07469	0.09149	-11.85	0.07469	0.02012
																																	-11.85	0.09959	0.05003	-11.85	0.09959	0.10099	-11.85	0.09959	0.02179
																																	-11.85	0.12448	0.05253	-11.85	0.12448	0.10707	-11.85	0.12448	0.02266
																																	-11.85	0.14938	0.05358	-11.85	0.14938	0.11054	-11.85	0.14938	0.023
																																	-11.85	0.17427	0.05338	-11.85	0.17427	0.1119	-11.85	0.17427	0.02298
																																	-11.85	0.19917	0.05205	-11.85	0.19917	0.11144	-11.85	0.19917	0.02268
																																	-11.85	0.22407	0.04961	-11.85	0.22407	0.10939	-11.85	0.22407	0.0221
																																	-11.85	0.24896	0.04616	-11.85	0.24896	0.10599	-11.85	0.24896	0.02119
																																	-11.85	0.27386	0.04186	-11.85	0.27386	0.10156	-11.85	0.27386	0.01996
																																	-11.85	0.29875	0.03703	-11.85	0.29875	0.09648	-11.85	0.29875	0.01848
																																	-11.85	0.32365	0.03205	-11.85	0.32365	0.09108	-11.85	0.32365	0.01686
																																	-11.85	0.34855	0.02729	-11.85	0.34855	0.08564	-11.85	0.34855	0.01522
																																	-11.85	0.37344	0.02303	-11.85	0.37344	0.08034	-11.85	0.37344	0.01365
																																	-11.85	0.39834	0.01935	-11.85	0.39834	0.07549	-11.85	0.39834	0.0122
																																	-11.85	0.42324	0.01616	-11.85	0.42324	0.07163	-11.85	0.42324	0.01089
																																	-11.85	0.44813	0.01325	-11.85	0.44813	0.06951	-11.85	0.44813	0.00979
																																	-11.85	0.47303	0.01044	-11.85	0.47303	0.06977	-11.85	0.47303	0.00899
																																	-11.85	0.49793	0.00768	-11.85	0.49793	0.07247	-11.85	0.49793	0.00864
																																	-11.85	0.52282	0.00511	-11.85	0.52282	0.07688	-11.85	0.52282	0.00881
																																	-11.85	0.54772	0.00312	-11.85	0.54772	0.08183	-11.85	0.54772	0.0094
																																	-11.85	0.57261	0.00269	-11.85	0.57261	0.08608	-11.85	0.57261	0.01018
																																	-11.85	0.59751	0.00369	-11.85	0.59751	0.08871	-11.85	0.59751	0.01091
																																	-11.85	0.62241	0.00483	-11.85	0.62241	0.08914	-11.85	0.62241	0.01142
																																	-11.85	0.6473	0.00565	-11.85	0.6473	0.08718	-11.85	0.6473	0.01161
																																	-11.85	0.6722	0.00606	-11.85	0.6722	0.08299	-11.85	0.6722	0.01146
																																	-11.85	0.6971	0.00612	-11.85	0.6971	0.07691	-11.85	0.6971	0.01099
																																	-11.85	0.72199	0.0059	-11.85	0.72199	0.06947	-11.85	0.72199	0.01024
																																	-11.85	0.74689	0.00549	-11.85	0.74689	0.06121	-11.85	0.74689	0.0093
																																	-11.85	0.77178	0.00499	-11.85	0.77178	0.05268	-11.85	0.77178	0.00825
																																	-11.85	0.79668	0.00446	-11.85	0.79668	0.04435	-11.85	0.79668	0.00717
																																	-11.85	0.82158	0.00394	-11.85	0.82158	0.03657	-11.85	0.82158	0.0061
																																	-11.85	0.84647	0.00346	-11.85	0.84647	0.02959	-11.85	0.84647	0.00512
																																	-11.85	0.87137	0.00302	-11.85	0.87137	0.02355	-11.85	0.87137	0.00423
																																	-11.85	0.89627	0.00263	-11.85	0.89627	0.01848	-11.85	0.89627	0.00347
																																	-11.85	0.92116	0.00228	-11.85	0.92116	0.01435	-11.85	0.92116	0.00282
																																	-11.85	0.94606	0.00196	-11.85	0.94606	0.01107	-11.85	0.94606	0.00229
																																	-11.85	0.97095	0.00167	-11.85	0.97095	0.00852	-11.85	0.97095	0.00186
																																	-11.85	0.99585	0.00142	-11.85	0.99585	0.00657	-11.85	0.99585	0.00152
																																	-11.85	1.02075	0.00119	-11.85	1.02075	0.00509	-11.85	1.02075	0.00124
																																	-11.85	1.04564	0.000987918	-11.85	1.04564	0.00399	-11.85	1.04564	0.00101
																																	-11.85	1.07054	0.000813017	-11.85	1.07054	0.00315	-11.85	1.07054	0.000827296
																																	-11.85	1.09544	0.000662581	-11.85	1.09544	0.00252	-11.85	1.09544	0.00067627
																																	-11.85	1.12033	0.000534699	-11.85	1.12033	0.00202	-11.85	1.12033	0.00055118
																																	-11.85	1.14523	0.000427263	-11.85	1.14523	0.00163	-11.85	1.14523	0.000447153
																																	-11.85	1.17012	0.000338069	-11.85	1.17012	0.00132	-11.85	1.17012	0.000360612
																																	-11.85	1.19502	0.000264915	-11.85	1.19502	0.00107	-11.85	1.19502	0.000288836
																																	-11.85	1.21992	0.000205659	-11.85	1.21992	0.000857874	-11.85	1.21992	0.000229645
																																	-11.85	1.24481	0.000158267	-11.85	1.24481	0.000687362	-11.85	1.24481	0.000181209
																																	-11.85	1.26971	0.000120851	-11.85	1.26971	0.000547918	-11.85	1.26971	0.000141931
																																	-11.85	1.29461	9.16828e-05	-11.85	1.29461	0.000434361	-11.85	1.29461	0.000110389
																																	-11.85	1.3195	6.92193e-05	-11.85	1.3195	0.000342416	-11.85	1.3195	8.53129e-05
																																	-11.85	1.3444	5.21061e-05	-11.85	1.3444	0.00026846	-11.85	1.3444	6.55701e-05
																																	-11.85	1.36929	3.91829e-05	-11.85	1.36929	0.000209381	-11.85	1.36929	5.01666e-05
																																	-11.85	1.39419	2.94804e-05	-11.85	1.39419	0.000162502	-11.85	1.39419	3.82439e-05
																																	-11.85	1.41909	2.22119e-05	-11.85	1.41909	0.000125541	-11.85	1.41909	2.90755e-05
																																	-11.85	1.44398	1.67583e-05	-11.85	1.44398	9.65707e-05	-11.85	1.44398	2.20595e-05
																																	-11.85	1.46888	1.26478e-05	-11.85	1.46888	7.39843e-05	-11.85	1.46888	1.67077e-05
																																	-11.85	1.49378	9.53108e-06	-11.85	1.49378	5.64604e-05	-11.85	1.49378	1.26324e-05
																																	-11.85	1.51867	7.15484e-06	-11.85	1.51867	4.29243e-05	-11.85	1.51867	9.53123e-06
																																	-11.85	1.54357	5.33711e-06	-11.85	1.54357	3.25114e-05	-11.85	1.54357	7.17193e-06
																																	-11.85	1.56847	3.94648e-06	-11.85	1.56847	2.4532e-05	-11.85	1.56847	5.37773e-06
																																	-11.85	1.59336	2.88624e-06	-11.85	1.59336	1.84404e-05	-11.85	1.59336	4.01478e-06
																																	-11.85	1.61826	2.08338e-06	-11.85	1.61826	1.38073e-05	-11.85	1.61826	2.98163e-06
																																	-11.85	1.64315	1.48129e-06	-11.85	1.64315	1.0297e-05	-11.85	1.64315	2.20112e-06
																																	-11.85	1.66805	1.03522e-06	-11.85	1.66805	7.64772e-06	-11.85	1.66805	1.61417e-06
																																	-11.85	1.69295	7.09417e-07	-11.85	1.69295	5.65627e-06	-11.85	1.69295	1.17529e-06
																																	-11.85	1.71784	4.75268e-07	-11.85	1.71784	4.16553e-06	-11.85	1.71784	8.49284e-07
																																	-11.85	1.74274	3.10021e-07	-11.85	1.74274	3.0544e-06	-11.85	1.74274	6.08903e-07
																																	-11.85	1.76764	1.95792e-07	-11.85	1.76764	2.22985e-06	-11.85	1.76764	4.33047e-07
																																	-11.85	1.79253	1.18744e-07	-11.85	1.79253	1.62072e-06	-11.85	1.79253	3.05457e-07
																																	-11.85	1.81743	6.83999e-08	-11.85	1.81743	1.17278e-06	-11.85	1.81743	2.13671e-07
																																	-11.85	1.84232	3.71083e-08	-11.85	1.84232	8.44888e-07	-11.85	1.84232	1.48212e-07
																																	-11.85	1.86722	1.97354e-08	-11.85	1.86722	6.0599e-07	-11.85	1.86722	1.01937e-07
																																	-11.85	1.89212	1.29675e-08	-11.85	1.89212	4.32737e-07	-11.85	1.89212	6.95121e-08
																																	-11.85	1.91701	1.20527e-08	-11.85	1.91701	3.07673e-07	-11.85	1.91701	4.69925e-08
																																	-11.85	1.94191	1.20428e-08	-11.85	1.94191	2.1781e-07	-11.85	1.94191	3.14917e-08
																																	-11.85	1.9668	1.14348e-08	-11.85	1.9668	1.53537e-07	-11.85	1.9668	2.0918e-08
																																	-11.85	1.9917	1.02706e-08	-11.85	1.9917	1.07774e-07	-11.85	1.9917	1.3771e-08
																																	-11.85	2.0166	8.83049e-09	-11.85	2.0166	7.53368e-08	-11.85	2.0166	8.98518e-09
																																	-11.85	2.04149	7.34186e-09	-11.85	2.04149	5.24472e-08	-11.85	2.04149	5.81101e-09
																																	-11.85	2.06639	5.94576e-09	-11.85	2.06639	3.63655e-08	-11.85	2.06639	3.7266e-09
																																	-11.85	2.09129	4.71411e-09	-11.85	2.09129	2.51157e-08	-11.85	2.09129	2.37195e-09
																																	-11.85	2.11618	3.67256e-09	-11.85	2.11618	1.72792e-08	-11.85	2.11618	1.50109e-09
																																	-11.85	2.14108	2.81892e-09	-11.85	2.14108	1.18432e-08	-11.85	2.14108	9.47596e-10
																																	-11.85	2.16598	2.13608e-09	-11.85	2.16598	8.08768e-09	-11.85	2.16598	5.99858e-10
																																	-11.85	2.19087	1.60049e-09	-11.85	2.19087	5.50349e-09	-11.85	2.19087	3.83716e-10
																																	-11.85	2.21577	1.18719e-09	-11.85	2.21577	3.73218e-09	-11.85	2.21577	2.5033e-10
																																	-11.85	2.24066	8.72651e-10	-11.85	2.24066	2.52263e-09	-11.85	2.24066	1.67905e-10
																																	-11.85	2.26556	6.36152e-10	-11.85	2.26556	1.69968e-09	-11.85	2.26556	1.16159e-10
																																	-11.85	2.29046	4.60215e-10	-11.85	2.29046	1.14173e-09	-11.85	2.29046	8.25999e-11
																																	-11.85	2.31535	3.30578e-10	-11.85	2.31535	7.64716e-10	-11.85	2.31535	5.98834e-11
																																	-11.85	2.34025	2.35881e-10	-11.85	2.34025	5.10786e-10	-11.85	2.34025	4.38618e-11
																																	-11.85	2.36515	1.67256e-10	-11.85	2.36515	3.4028e-10	-11.85	2.36515	3.22173e-11
																																	-11.85	2.39004	1.17891e-10	-11.85	2.39004	2.26123e-10	-11.85	2.39004	2.36115e-11
																																	-11.85	2.41494	8.26242e-11	-11.85	2.41494	1.49904e-10	-11.85	2.41494	1.7214e-11
																																	-11.85	2.43983	5.75925e-11	-11.85	2.43983	9.91477e-11	-11.85	2.43983	1.24643e-11
																																	-11.85	2.46473	3.99343e-11	-11.85	2.46473	6.54318e-11	-11.85	2.46473	8.95709e-12
																																	-11.85	2.48963	2.75504e-11	-11.85	2.48963	4.30881e-11	-11.85	2.48963	6.38688e-12
																																	-11.85	2.51452	1.89138e-11	-11.85	2.51452	2.83141e-11	-11.85	2.51452	4.51919e-12
																																	-11.85	2.53942	1.29229e-11	-11.85	2.53942	1.85667e-11	-11.85	2.53942	3.17377e-12
																																	-11.85	2.56432	8.78885e-12	-11.85	2.56432	1.21492e-11	-11.85	2.56432	2.21287e-12
																																	-11.85	2.58921	5.95034e-12	-11.85	2.58921	7.93295e-12	-11.85	2.58921	1.53226e-12
																																	-11.85	2.61411	4.01085e-12	-11.85	2.61411	5.16862e-12	-11.85	2.61411	1.05399e-12
																																	-11.85	2.639	2.69189e-12	-11.85	2.639	3.36004e-12	-11.85	2.639	7.20442e-13
																																	-11.85	2.6639	1.79905e-12	-11.85	2.6639	2.17929e-12	-11.85	2.6639	4.89482e-13
																																	-11.85	2.6888	1.19738e-12	-11.85	2.6888	1.41011e-12	-11.85	2.6888	3.30644e-13
																																	-11.85	2.71369	7.93693e-13	-11.85	2.71369	9.10182e-13	-11.85	2.71369	2.22113e-13
																																	-11.85	2.73859	5.24008e-13	-11.85	2.73859	5.86007e-13	-11.85	2.73859	1.48412e-13
																																	-11.85	2.76349	3.446e-13	-11.85	2.76349	3.7631e-13	-11.85	2.76349	9.86576e-14
																																	-11.85	2.78838	2.25741e-13	-11.85	2.78838	2.41004e-13	-11.85	2.78838	6.52587e-14
																																	-11.85	2.81328	1.47315e-13	-11.85	2.81328	1.53926e-13	-11.85	2.81328	4.29599e-14
																																	-11.85	2.83817	9.5774e-14	-11.85	2.83817	9.80356e-14	-11.85	2.83817	2.81494e-14
																																	-11.85	2.86307	6.20342e-14	-11.85	2.86307	6.22613e-14	-11.85	2.86307	1.83618e-14
																																	-11.85	2.88797	4.00329e-14	-11.85	2.88797	3.94275e-14	-11.85	2.88797	1.19249e-14
																																	-11.85	2.91286	2.57407e-14	-11.85	2.91286	2.48951e-14	-11.85	2.91286	7.71143e-15
																																	-11.85	2.93776	1.64914e-14	-11.85	2.93776	1.56731e-14	-11.85	2.93776	4.96591e-15
																																	-11.85	2.96266	1.05279e-14	-11.85	2.96266	9.83812e-15	-11.85	2.96266	3.18483e-15
																																	-11.85	2.98755	6.69707e-15	-11.85	2.98755	6.15726e-15	-11.85	2.98755	2.03437e-15
																																	-11.85	3.01245	4.2452e-15	-11.85	3.01245	3.8422e-15	-11.85	3.01245	1.29438e-15
																																	-11.85	3.03734	2.68158e-15	-11.85	3.03734	2.39052e-15	-11.85	3.03734	8.2037e-16
																																	-11.85	3.06224	1.688e-15	-11.85	3.06224	1.48296e-15	-11.85	3.06224	5.17961e-16
																																	-11.85	3.08714	1.05888e-15	-11.85	3.08714	9.17274e-16	-11.85	3.08714	3.25795e-16
																																	-11.85	3.11203	6.61955e-16	-11.85	3.11203	5.65724e-16	-11.85	3.11203	2.04161e-16
																																	-11.85	3.13693	4.12398e-16	-11.85	3.13693	3.479e-16	-11.85	3.13693	1.27466e-16
																																	-11.85	3.16183	2.56046e-16	-11.85	3.16183	2.13331e-16	-11.85	3.16183	7.92916e-17
																																	-11.85	3.18672	1.5843e-16	-11.85	3.18672	1.3044e-16	-11.85	3.18672	4.91452e-17
																																	-11.85	3.21162	9.7697e-17	-11.85	3.21162	7.953e-17	-11.85	3.21162	3.03506e-17
																																	-11.85	3.23651	6.00412e-17	-11.85	3.23651	4.83523e-17	-11.85	3.23651	1.86765e-17
																																	-11.85	3.26141	3.67745e-17	-11.85	3.26141	2.93138e-17	-11.85	3.26141	1.14518e-17
																																	-11.85	3.28631	2.24479e-17	-11.85	3.28631	1.77214e-17	-11.85	3.28631	6.99692e-18
																																	-11.85	3.3112	1.36564e-17	-11.85	3.3112	1.0683e-17	-11.85	3.3112	4.25993e-18
																																	-11.85	3.3361	8.28011e-18	-11.85	3.3361	6.42182e-18	-11.85	3.3361	2.58444e-18
																																	-11.85	3.361	5.00349e-18	-11.85	3.361	3.84936e-18	-11.85	3.361	1.56244e-18
																																	-11.85	3.38589	3.01334e-18	-11.85	3.38589	2.3008e-18	-11.85	3.38589	9.41272e-19
																																	-11.85	3.41079	1.8087e-18	-11.85	3.41079	1.37127e-18	-11.85	3.41079	5.65077e-19
																																	-11.85	3.43568	1.08199e-18	-11.85	3.43568	8.14924e-19	-11.85	3.43568	3.38053e-19
																																	-11.85	3.46058	6.45101e-19	-11.85	3.46058	4.82891e-19	-11.85	3.46058	2.01534e-19
																																	-11.85	3.48548	3.83332e-19	-11.85	3.48548	2.85306e-19	-11.85	3.48548	1.1973e-19
																																	-11.85	3.51037	2.27021e-19	-11.85	3.51037	1.68072e-19	-11.85	3.51037	7.08847e-20
																																	-11.85	3.53527	1.34e-19	-11.85	3.53527	9.8716e-20	-11.85	3.53527	4.18212e-20
																																	-11.85	3.56017	7.88297e-20	-11.85	3.56017	5.78071e-20	-11.85	3.56017	2.4589e-20
																																	-11.85	3.58506	4.62191e-20	-11.85	3.58506	3.37492e-20	-11.85	3.58506	1.44074e-20
																																	-11.85	3.60996	2.70085e-20	-11.85	3.60996	1.96438e-20	-11.85	3.60996	8.4127e-21
																																	-11.85	3.63485	1.573e-20	-11.85	3.63485	1.13987e-20	-11.85	3.63485	4.89545e-21
																																	-11.85	3.65975	9.13068e-21	-11.85	3.65975	6.59393e-21	-11.85	3.65975	2.83896e-21
																																	-11.85	3.68465	5.28234e-21	-11.85	3.68465	3.80261e-21	-11.85	3.68465	1.64073e-21
																																	-11.85	3.70954	3.04577e-21	-11.85	3.70954	2.18604e-21	-11.85	3.70954	9.44997e-22
																																	-11.85	3.73444	1.75032e-21	-11.85	3.73444	1.25276e-21	-11.85	3.73444	5.42425e-22
																																	-11.85	3.75934	1.0025e-21	-11.85	3.75934	7.15642e-22	-11.85	3.75934	3.10291e-22
																																	-11.85	3.78423	5.72266e-22	-11.85	3.78423	4.07512e-22	-11.85	3.78423	1.76896e-22
																																	-11.85	3.80913	3.25582e-22	-11.85	3.80913	2.31308e-22	-11.85	3.80913	1.00506e-22
																																	-11.85	3.83403	1.84616e-22	-11.85	3.83403	1.30871e-22	-11.85	3.83403	5.69102e-23
																																	-11.85	3.85892	1.04333e-22	-11.85	3.85892	7.38053e-23	-11.85	3.85892	3.21156e-23
																																	-11.85	3.88382	5.87657e-23	-11.85	3.88382	4.14879e-23	-11.85	3.88382	1.80622e-23
																																	-11.85	3.90871	3.2989e-23	-11.85	3.90871	2.32454e-23	-11.85	3.90871	1.01241e-23
																																	-11.85	3.93361	1.84569e-23	-11.85	3.93361	1.29817e-23	-11.85	3.93361	5.6555e-24
																																	-11.85	3.95851	1.02919e-23	-11.85	3.95851	7.22606e-24	-11.85	3.95851	3.14862e-24
																																	-11.85	3.9834	5.71966e-24	-11.85	3.9834	4.00904e-24	-11.85	3.9834	1.74705e-24
																																	-11.85	4.0083	3.16803e-24	-11.85	4.0083	2.2169e-24	-11.85	4.0083	9.66108e-25
																																	-11.85	4.0332	1.74884e-24	-11.85	4.0332	1.22184e-24	-11.85	4.0332	5.32455e-25
																																	-11.85	4.05809	9.62169e-25	-11.85	4.05809	6.71186e-25	-11.85	4.05809	2.92467e-25
																																	-11.85	4.08299	5.27585e-25	-11.85	4.08299	3.67476e-25	-11.85	4.08299	1.60107e-25
																																	-11.85	4.10788	2.88318e-25	-11.85	4.10788	2.00526e-25	-11.85	4.10788	8.73542e-26
																																	-11.85	4.13278	1.57033e-25	-11.85	4.13278	1.0906e-25	-11.85	4.13278	4.75003e-26
																																	-11.85	4.15768	8.52403e-26	-11.85	4.15768	5.91165e-26	-11.85	4.15768	2.57425e-26
																																	-11.85	4.18257	4.61144e-26	-11.85	4.18257	3.19376e-26	-11.85	4.18257	1.39041e-26
																																	-11.85	4.20747	2.48636e-26	-11.85	4.20747	1.71967e-26	-11.85	4.20747	7.4848e-27
																																	-11.85	4.23236	1.33606e-26	-11.85	4.23236	9.2285e-27	-11.85	4.23236	4.01567e-27
																																	-11.85	4.25726	7.15518e-27	-11.85	4.25726	4.93586e-27	-11.85	4.25726	2.14723e-27
																																	-11.85	4.28216	3.819e-27	-11.85	4.28216	2.6311e-27	-11.85	4.28216	1.1443e-27
																																	-11.85	4.30705	2.03147e-27	-11.85	4.30705	1.39783e-27	-11.85	4.30705	6.07777e-28
																																	-11.85	4.33195	1.07697e-27	-11.85	4.33195	7.40139e-28	-11.85	4.33195	3.21729e-28
																																	-11.85	4.35685	5.69017e-28	-11.85	4.35685	3.90581e-28	-11.85	4.35685	1.69738e-28
																																	-11.85	4.38174	2.99625e-28	-11.85	4.38174	2.05423e-28	-11.85	4.38174	8.92508e-29
																																	-11.85	4.40664	1.57239e-28	-11.85	4.40664	1.07677e-28	-11.85	4.40664	4.67721e-29
																																	-11.85	4.43154	8.22379e-29	-11.85	4.43154	5.62518e-29	-11.85	4.43154	2.44289e-29
																																	-11.85	4.45643	4.28658e-29	-11.85	4.45643	2.92877e-29	-11.85	4.45643	1.27164e-29
																																	-11.85	4.48133	2.22678e-29	-11.85	4.48133	1.51974e-29	-11.85	4.48133	6.59727e-30
																																	-11.85	4.50622	1.15284e-29	-11.85	4.50622	7.85942e-30	-11.85	4.50622	3.4112e-30
																																	-11.85	4.53112	5.94827e-30	-11.85	4.53112	4.05084e-30	-11.85	4.53112	1.75789e-30
																																	-11.85	4.55602	3.05869e-30	-11.85	4.55602	2.08082e-30	-11.85	4.55602	9.02859e-31
																																	-11.85	4.58091	1.5675e-30	-11.85	4.58091	1.06526e-30	-11.85	4.58091	4.62156e-31
																																	-11.85	4.60581	8.00574e-31	-11.85	4.60581	5.43515e-31	-11.85	4.60581	2.35776e-31
																																	-11.85	4.6307	4.07494e-31	-11.85	4.6307	2.76375e-31	-11.85	4.6307	1.19881e-31
																																	-11.85	4.6556	2.06712e-31	-11.85	4.6556	1.40062e-31	-11.85	4.6556	6.07494e-32
																																	-11.85	4.6805	1.04504e-31	-11.85	4.6805	7.07409e-32	-11.85	4.6805	3.06814e-32
																																	-11.85	4.70539	5.26528e-32	-11.85	4.70539	3.56084e-32	-11.85	4.70539	1.54436e-32
																																	-11.85	4.73029	2.64384e-32	-11.85	4.73029	1.78635e-32	-11.85	4.73029	7.7475e-33
																																	-11.85	4.75519	1.32303e-32	-11.85	4.75519	8.9312e-33	-11.85	4.75519	3.8736e-33
																																	-11.85	4.78008	6.59824e-33	-11.85	4.78008	4.45025e-33	-11.85	4.78008	1.93022e-33
																																	-11.85	4.80498	3.2795e-33	-11.85	4.80498	2.20998e-33	-11.85	4.80498	9.58604e-34
																																	-11.85	4.82988	1.62446e-33	-11.85	4.82988	1.09376e-33	-11.85	4.82988	4.74472e-34
																																	-11.85	4.85477	8.01921e-34	-11.85	4.85477	5.3949e-34	-11.85	4.85477	2.34056e-34
																																	-11.85	4.87967	3.94526e-34	-11.85	4.87967	2.65201e-34	-11.85	4.87967	1.15072e-34
																																	-11.85	4.90456	1.93438e-34	-11.85	4.90456	1.29926e-34	-11.85	4.90456	5.63838e-35
																																	-11.85	4.92946	9.45206e-35	-11.85	4.92946	6.34373e-35	-11.85	4.92946	2.75346e-35
																																	-11.85	4.95436	4.60292e-35	-11.85	4.95436	3.0869e-35	-11.85	4.95436	1.34011e-35
																																	-11.85	4.97925	2.23388e-35	-11.85	4.97925	1.49702e-35	-11.85	4.97925	6.50038e-36
																																	-11.85	5.00415	1.08046e-35	-11.85	5.00415	7.23538e-36	-11.85	5.00415	3.14249e-36
																																	-11.85	5.02905	5.20807e-36	-11.85	5.02905	3.48516e-36	-11.85	5.02905	1.51407e-36
																																	-11.85	5.05394	2.50187e-36	-11.85	5.05394	1.67306e-36	-11.85	5.05394	7.27033e-37
																																	-11.85	5.07884	1.19777e-36	-11.85	5.07884	8.0044e-37	-11.85	5.07884	3.47935e-37
																																	-11.85	5.10373	5.71483e-37	-11.85	5.10373	3.81656e-37	-11.85	5.10373	1.6595e-37
																																	-11.85	5.12863	2.71739e-37	-11.85	5.12863	1.81361e-37	-11.85	5.12863	7.88845e-38
																																	-11.85	5.15353	1.28772e-37	-11.85	5.15353	8.58899e-38	-11.85	5.15353	3.73715e-38
																																	-11.85	5.17842	6.08151e-38	-11.85	5.17842	4.05384e-38	-11.85	5.17842	1.76451e-38
																																	-11.85	5.20332	2.86234e-38	-11.85	5.20332	1.90686e-38	-11.85	5.20332	8.30311e-39
																																	-11.85	5.22822	1.34261e-38	-11.85	5.22822	8.93917e-39	-11.85	5.22822	3.89396e-39
																																	-11.85	5.25311	6.27625e-39	-11.85	5.25311	4.1764e-39	-11.85	5.25311	1.82002e-39
																																	-11.85	5.27801	2.92395e-39	-11.85	5.27801	1.94461e-39	-11.85	5.27801	8.47798e-40
																																	-11.85	5.30291	1.35756e-39	-11.85	5.30291	9.02383e-40	-11.85	5.30291	3.93588e-40
																																	-11.85	5.3278	6.28159e-40	-11.85	5.3278	4.17325e-40	-11.85	5.3278	1.82106e-40
																																	-11.85	5.3527	2.89667e-40	-11.85	5.3527	1.92346e-40	-11.85	5.3527	8.39723e-41
																																	-11.85	5.37759	1.33122e-40	-11.85	5.37759	8.83525e-41	-11.85	5.37759	3.85905e-41
																																	-11.85	5.40249	6.09706e-41	-11.85	5.40249	4.04464e-41	-11.85	5.40249	1.76748e-41
																																	-11.85	5.42739	2.78299e-41	-11.85	5.42739	1.8453e-41	-11.85	5.42739	8.06791e-42
																																	-11.85	5.45228	1.26597e-41	-11.85	5.45228	8.3903e-42	-11.85	5.45228	3.67026e-42
																																	-11.85	5.47718	5.73922e-42	-11.85	5.47718	3.80202e-42	-11.85	5.47718	1.66403e-42
																																	-11.85	5.50207	2.59301e-42	-11.85	5.50207	1.71702e-42	-11.85	5.50207	7.51895e-43
																																	-11.85	5.52697	1.16755e-42	-11.85	5.52697	7.72792e-43	-11.85	5.52697	3.38595e-43
																																	-11.85	5.55187	5.23925e-43	-11.85	5.55187	3.46636e-43	-11.85	5.55187	1.51961e-43
																																	-11.85	5.57676	2.34305e-43	-11.85	5.57676	1.54957e-43	-11.85	5.57676	6.79694e-44
																																	-11.85	5.60166	1.04428e-43	-11.85	5.60166	6.90351e-44	-11.85	5.60166	3.02985e-44
																																	-11.85	5.62656	4.63841e-44	-11.85	5.62656	3.06517e-44	-11.85	5.62656	1.34604e-44
																																	-11.85	5.65145	2.05326e-44	-11.85	5.65145	1.35632e-44	-11.85	5.65145	5.95964e-45
																																	-11.85	5.67635	9.05813e-45	-11.85	5.67635	5.9813e-45	-11.85	5.67635	2.62972e-45
																																	-11.85	5.70125	3.98248e-45	-11.85	5.70125	2.62877e-45	-11.85	5.70125	1.15645e-45
																																	-11.85	5.72614	1.74498e-45	-11.85	5.72614	1.15141e-45	-11.85	5.72614	5.06836e-46
																																	-11.85	5.75104	7.61987e-46	-11.85	5.75104	5.02614e-46	-11.85	5.75104	2.21378e-46
																																	-11.85	5.77593	3.31608e-46	-11.85	5.77593	2.18656e-46	-11.85	5.77593	9.63667e-47
																																	-11.85	5.80083	1.43822e-46	-11.85	5.80083	9.48005e-47	-11.85	5.80083	4.18066e-47
																																	-11.85	5.82573	6.21646e-47	-11.85	5.82573	4.09622e-47	-11.85	5.82573	1.80753e-47
																																	-11.85	5.85062	2.67783e-47	-11.85	5.85062	1.76392e-47	-11.85	5.85062	7.78848e-48
																																	-11.85	5.87552	1.14959e-47	-11.85	5.87552	7.57e-48	-11.85	5.87552	3.34459e-48
																																	-11.85	5.90041	4.91843e-48	-11.85	5.90041	3.23769e-48	-11.85	5.90041	1.43138e-48
																																	-11.85	5.92531	2.09715e-48	-11.85	5.92531	1.38006e-48	-11.85	5.92531	6.1051e-49
																																	-11.85	5.95021	8.91153e-49	-11.85	5.95021	5.86248e-49	-11.85	5.95021	2.59509e-49
																																	-11.85	5.9751	3.77395e-49	-11.85	5.9751	2.48192e-49	-11.85	5.9751	1.09935e-49
																																	-11.85	6	1.5928e-49	-11.85	6	1.04716e-49	-11.85	6	4.6413e-50
																																	-11.8	0	0.01272	-11.8	0	0.02524	-11.8	0	0.00571
																																	-11.8	0.0249	0.02815	-11.8	0.0249	0.05591	-11.8	0.0249	0.01262
																																	-11.8	0.04979	0.03882	-11.8	0.04979	0.07735	-11.8	0.04979	0.01728
																																	-11.8	0.07469	0.04568	-11.8	0.07469	0.09152	-11.8	0.07469	0.02013
																																	-11.8	0.09959	0.05005	-11.8	0.09959	0.10104	-11.8	0.09959	0.02181
																																	-11.8	0.12448	0.05257	-11.8	0.12448	0.10715	-11.8	0.12448	0.02268
																																	-11.8	0.14938	0.05363	-11.8	0.14938	0.11066	-11.8	0.14938	0.02302
																																	-11.8	0.17427	0.05346	-11.8	0.17427	0.11206	-11.8	0.17427	0.02302
																																	-11.8	0.19917	0.05214	-11.8	0.19917	0.11165	-11.8	0.19917	0.02273
																																	-11.8	0.22407	0.04973	-11.8	0.22407	0.10965	-11.8	0.22407	0.02215
																																	-11.8	0.24896	0.04629	-11.8	0.24896	0.10629	-11.8	0.24896	0.02125
																																	-11.8	0.27386	0.04201	-11.8	0.27386	0.10191	-11.8	0.27386	0.02003
																																	-11.8	0.29875	0.03719	-11.8	0.29875	0.09687	-11.8	0.29875	0.01856
																																	-11.8	0.32365	0.03221	-11.8	0.32365	0.0915	-11.8	0.32365	0.01694
																																	-11.8	0.34855	0.02745	-11.8	0.34855	0.08608	-11.8	0.34855	0.0153
																																	-11.8	0.37344	0.02318	-11.8	0.37344	0.08079	-11.8	0.37344	0.01373
																																	-11.8	0.39834	0.0195	-11.8	0.39834	0.07595	-11.8	0.39834	0.01228
																																	-11.8	0.42324	0.0163	-11.8	0.42324	0.0721	-11.8	0.42324	0.01097
																																	-11.8	0.44813	0.01337	-11.8	0.44813	0.06999	-11.8	0.44813	0.00986
																																	-11.8	0.47303	0.01054	-11.8	0.47303	0.07027	-11.8	0.47303	0.00906
																																	-11.8	0.49793	0.00776	-11.8	0.49793	0.07303	-11.8	0.49793	0.00871
																																	-11.8	0.52282	0.00516	-11.8	0.52282	0.07755	-11.8	0.52282	0.00888
																																	-11.8	0.54772	0.00314	-11.8	0.54772	0.08262	-11.8	0.54772	0.00948
																																	-11.8	0.57261	0.00269	-11.8	0.57261	0.087	-11.8	0.57261	0.01028
																																	-11.8	0.59751	0.00372	-11.8	0.59751	0.08975	-11.8	0.59751	0.01103
																																	-11.8	0.62241	0.00488	-11.8	0.62241	0.09028	-11.8	0.62241	0.01156
																																	-11.8	0.6473	0.00572	-11.8	0.6473	0.08841	-11.8	0.6473	0.01177
																																	-11.8	0.6722	0.00615	-11.8	0.6722	0.08425	-11.8	0.6722	0.01163
																																	-11.8	0.6971	0.00621	-11.8	0.6971	0.07817	-11.8	0.6971	0.01116
																																	-11.8	0.72199	0.00599	-11.8	0.72199	0.07068	-11.8	0.72199	0.01041
																																	-11.8	0.74689	0.00559	-11.8	0.74689	0.06235	-11.8	0.74689	0.00947
																																	-11.8	0.77178	0.00508	-11.8	0.77178	0.05373	-11.8	0.77178	0.00841
																																	-11.8	0.79668	0.00454	-11.8	0.79668	0.04528	-11.8	0.79668	0.00731
																																	-11.8	0.82158	0.00402	-11.8	0.82158	0.03738	-11.8	0.82158	0.00623
																																	-11.8	0.84647	0.00353	-11.8	0.84647	0.03028	-11.8	0.84647	0.00523
																																	-11.8	0.87137	0.00309	-11.8	0.87137	0.02412	-11.8	0.87137	0.00433
																																	-11.8	0.89627	0.00269	-11.8	0.89627	0.01895	-11.8	0.89627	0.00355
																																	-11.8	0.92116	0.00233	-11.8	0.92116	0.01473	-11.8	0.92116	0.0029
																																	-11.8	0.94606	0.00201	-11.8	0.94606	0.01137	-11.8	0.94606	0.00235
																																	-11.8	0.97095	0.00172	-11.8	0.97095	0.00875	-11.8	0.97095	0.00191
																																	-11.8	0.99585	0.00146	-11.8	0.99585	0.00675	-11.8	0.99585	0.00156
																																	-11.8	1.02075	0.00122	-11.8	1.02075	0.00524	-11.8	1.02075	0.00127
																																	-11.8	1.04564	0.00102	-11.8	1.04564	0.00411	-11.8	1.04564	0.00104
																																	-11.8	1.07054	0.000839891	-11.8	1.07054	0.00325	-11.8	1.07054	0.000853856
																																	-11.8	1.09544	0.000685522	-11.8	1.09544	0.0026	-11.8	1.09544	0.000698989
																																	-11.8	1.12033	0.000554067	-11.8	1.12033	0.00209	-11.8	1.12033	0.000570564
																																	-11.8	1.14523	0.00044343	-11.8	1.14523	0.00169	-11.8	1.14523	0.000463613
																																	-11.8	1.17012	0.000351414	-11.8	1.17012	0.00137	-11.8	1.17012	0.000374496
																																	-11.8	1.19502	0.000275805	-11.8	1.19502	0.00111	-11.8	1.19502	0.000300453
																																	-11.8	1.21992	0.000214447	-11.8	1.21992	0.00089242	-11.8	1.21992	0.00023928
																																	-11.8	1.24481	0.000165284	-11.8	1.24481	0.000716264	-11.8	1.24481	0.000189127
																																	-11.8	1.26971	0.000126397	-11.8	1.26971	0.000571943	-11.8	1.26971	0.00014838
																																	-11.8	1.29461	9.60302e-05	-11.8	1.29461	0.000454193	-11.8	1.29461	0.000115596
																																	-11.8	1.3195	7.26038e-05	-11.8	1.3195	0.000358674	-11.8	1.3195	8.94833e-05
																																	-11.8	1.3444	5.47294e-05	-11.8	1.3444	0.000281698	-11.8	1.3444	6.88871e-05
																																	-11.8	1.36929	4.12125e-05	-11.8	1.36929	0.000220091	-11.8	1.36929	5.27896e-05
																																	-11.8	1.39419	3.1052e-05	-11.8	1.39419	0.000171116	-11.8	1.39419	4.03088e-05
																																	-11.8	1.41909	2.3432e-05	-11.8	1.41909	0.000132431	-11.8	1.41909	3.06958e-05
																																	-11.8	1.44398	1.77088e-05	-11.8	1.44398	0.000102053	-11.8	1.44398	2.33281e-05
																																	-11.8	1.46888	1.33903e-05	-11.8	1.46888	7.83272e-05	-11.8	1.46888	1.76995e-05
																																	-11.8	1.49378	1.01115e-05	-11.8	1.49378	5.98853e-05	-11.8	1.49378	1.34067e-05
																																	-11.8	1.51867	7.60767e-06	-11.8	1.51867	4.5614e-05	-11.8	1.51867	1.01349e-05
																																	-11.8	1.54357	5.68859e-06	-11.8	1.54357	3.4615e-05	-11.8	1.54357	7.64157e-06
																																	-11.8	1.56847	4.21709e-06	-11.8	1.56847	2.61704e-05	-11.8	1.56847	5.74196e-06
																																	-11.8	1.59336	3.09235e-06	-11.8	1.59336	1.97112e-05	-11.8	1.59336	4.29608e-06
																																	-11.8	1.61826	2.2383e-06	-11.8	1.61826	1.4789e-05	-11.8	1.61826	3.19776e-06
																																	-11.8	1.64315	1.59597e-06	-11.8	1.64315	1.10519e-05	-11.8	1.64315	2.36616e-06
																																	-11.8	1.66805	1.11865e-06	-11.8	1.66805	8.22571e-06	-11.8	1.66805	1.73932e-06
																																	-11.8	1.69295	7.68916e-07	-11.8	1.69295	6.09678e-06	-11.8	1.69295	1.26946e-06
																																	-11.8	1.71784	5.16747e-07	-11.8	1.71784	4.49971e-06	-11.8	1.71784	9.19583e-07
																																	-11.8	1.74274	3.38174e-07	-11.8	1.74274	3.30671e-06	-11.8	1.74274	6.60934e-07
																																	-11.8	1.76764	2.14278e-07	-11.8	1.76764	2.41944e-06	-11.8	1.76764	4.71225e-07
																																	-11.8	1.79253	1.30365e-07	-11.8	1.79253	1.76249e-06	-11.8	1.79253	3.33222e-07
																																	-11.8	1.81743	7.52552e-08	-11.8	1.81743	1.27829e-06	-11.8	1.81743	2.33683e-07
																																	-11.8	1.84232	4.07343e-08	-11.8	1.84232	9.23029e-07	-11.8	1.84232	1.62506e-07
																																	-11.8	1.86722	2.12646e-08	-11.8	1.86722	6.63583e-07	-11.8	1.86722	1.12054e-07
																																	-11.8	1.89212	1.34854e-08	-11.8	1.89212	4.74984e-07	-11.8	1.89212	7.66066e-08
																																	-11.8	1.91701	1.25707e-08	-11.8	1.91701	3.38515e-07	-11.8	1.91701	5.19215e-08
																																	-11.8	1.94191	1.27849e-08	-11.8	1.94191	2.40221e-07	-11.8	1.94191	3.4884e-08
																																	-11.8	1.9668	1.2297e-08	-11.8	1.9668	1.69746e-07	-11.8	1.9668	2.32303e-08
																																	-11.8	1.9917	1.11434e-08	-11.8	1.9917	1.19443e-07	-11.8	1.9917	1.53316e-08
																																	-11.8	2.0166	9.64425e-09	-11.8	2.0166	8.37003e-08	-11.8	2.0166	1.00278e-08
																																	-11.8	2.04149	8.06109e-09	-11.8	2.04149	5.84147e-08	-11.8	2.04149	6.50037e-09
																																	-11.8	2.06639	6.55786e-09	-11.8	2.06639	4.06048e-08	-11.8	2.06639	4.17757e-09
																																	-11.8	2.09129	5.22046e-09	-11.8	2.09129	2.81143e-08	-11.8	2.09129	2.66386e-09
																																	-11.8	2.11618	4.08219e-09	-11.8	2.11618	1.93913e-08	-11.8	2.11618	1.68816e-09
																																	-11.8	2.14108	3.14431e-09	-11.8	2.14108	1.33248e-08	-11.8	2.14108	1.06647e-09
																																	-11.8	2.16598	2.39063e-09	-11.8	2.16598	9.12287e-09	-11.8	2.16598	6.75052e-10
																																	-11.8	2.19087	1.79703e-09	-11.8	2.19087	6.22396e-09	-11.8	2.19087	4.31397e-10
																																	-11.8	2.21577	1.3372e-09	-11.8	2.21577	4.23173e-09	-11.8	2.21577	2.80993e-10
																																	-11.8	2.24066	9.85979e-10	-11.8	2.24066	2.86774e-09	-11.8	2.24066	1.88193e-10
																																	-11.8	2.26556	7.20981e-10	-11.8	2.26556	1.93728e-09	-11.8	2.26556	1.30128e-10
																																	-11.8	2.29046	5.23178e-10	-11.8	2.29046	1.30476e-09	-11.8	2.29046	9.26245e-11
																																	-11.8	2.31535	3.76948e-10	-11.8	2.31535	8.76229e-10	-11.8	2.31535	6.73135e-11
																																	-11.8	2.34025	2.69785e-10	-11.8	2.34025	5.8683e-10	-11.8	2.34025	4.9473e-11
																																	-11.8	2.36515	1.91878e-10	-11.8	2.36515	3.91987e-10	-11.8	2.36515	3.64834e-11
																																	-11.8	2.39004	1.35657e-10	-11.8	2.39004	2.61186e-10	-11.8	2.39004	2.68504e-11
																																	-11.8	2.41494	9.53655e-11	-11.8	2.41494	1.73619e-10	-11.8	2.41494	1.96583e-11
																																	-11.8	2.43983	6.66772e-11	-11.8	2.43983	1.15149e-10	-11.8	2.43983	1.42937e-11
																																	-11.8	2.46473	4.63757e-11	-11.8	2.46473	7.62019e-11	-11.8	2.46473	1.03137e-11
																																	-11.8	2.48963	3.2093e-11	-11.8	2.48963	5.03209e-11	-11.8	2.48963	7.38357e-12
																																	-11.8	2.51452	2.21008e-11	-11.8	2.51452	3.31606e-11	-11.8	2.51452	5.24479e-12
																																	-11.8	2.53942	1.51476e-11	-11.8	2.53942	2.18071e-11	-11.8	2.53942	3.69742e-12
																																	-11.8	2.56432	1.03342e-11	-11.8	2.56432	1.4311e-11	-11.8	2.56432	2.58764e-12
																																	-11.8	2.58921	7.01872e-12	-11.8	2.58921	9.37203e-12	-11.8	2.58921	1.79838e-12
																																	-11.8	2.61411	4.74604e-12	-11.8	2.61411	6.12447e-12	-11.8	2.61411	1.24157e-12
																																	-11.8	2.639	3.19552e-12	-11.8	2.639	3.99347e-12	-11.8	2.639	8.51727e-13
																																	-11.8	2.6639	2.14252e-12	-11.8	2.6639	2.59808e-12	-11.8	2.6639	5.80756e-13
																																	-11.8	2.6888	1.43061e-12	-11.8	2.6888	1.68632e-12	-11.8	2.6888	3.937e-13
																																	-11.8	2.71369	9.5139e-13	-11.8	2.71369	1.0919e-12	-11.8	2.71369	2.65412e-13
																																	-11.8	2.73859	6.30189e-13	-11.8	2.73859	7.05245e-13	-11.8	2.73859	1.77973e-13
																																	-11.8	2.76349	4.15801e-13	-11.8	2.76349	4.54342e-13	-11.8	2.76349	1.18728e-13
																																	-11.8	2.78838	2.73293e-13	-11.8	2.78838	2.9193e-13	-11.8	2.78838	7.88129e-14
																																	-11.8	2.81328	1.78947e-13	-11.8	2.81328	1.87068e-13	-11.8	2.81328	5.20667e-14
																																	-11.8	2.83817	1.16733e-13	-11.8	2.83817	1.19541e-13	-11.8	2.83817	3.42379e-14
																																	-11.8	2.86307	7.58677e-14	-11.8	2.86307	7.61753e-14	-11.8	2.86307	2.24129e-14
																																	-11.8	2.88797	4.91285e-14	-11.8	2.88797	4.84027e-14	-11.8	2.88797	1.46078e-14
																																	-11.8	2.91286	3.16986e-14	-11.8	2.91286	3.0667e-14	-11.8	2.91286	9.48029e-15
																																	-11.8	2.93776	2.03794e-14	-11.8	2.93776	1.93736e-14	-11.8	2.93776	6.12699e-15
																																	-11.8	2.96266	1.30557e-14	-11.8	2.96266	1.22033e-14	-11.8	2.96266	3.9437e-15
																																	-11.8	2.98755	8.33455e-15	-11.8	2.98755	7.66434e-15	-11.8	2.98755	2.52828e-15
																																	-11.8	3.01245	5.30206e-15	-11.8	3.01245	4.79955e-15	-11.8	3.01245	1.61452e-15
																																	-11.8	3.03734	3.36124e-15	-11.8	3.03734	2.99679e-15	-11.8	3.03734	1.02704e-15
																																	-11.8	3.06224	2.12351e-15	-11.8	3.06224	1.86573e-15	-11.8	3.06224	6.50845e-16
																																	-11.8	3.08714	1.33696e-15	-11.8	3.08714	1.15819e-15	-11.8	3.08714	4.10904e-16
																																	-11.8	3.11203	8.38872e-16	-11.8	3.11203	7.16905e-16	-11.8	3.11203	2.5846e-16
																																	-11.8	3.13693	5.2456e-16	-11.8	3.13693	4.42484e-16	-11.8	3.13693	1.61977e-16
																																	-11.8	3.16183	3.26904e-16	-11.8	3.16183	2.7233e-16	-11.8	3.16183	1.01142e-16
																																	-11.8	3.18672	2.03038e-16	-11.8	3.18672	1.67133e-16	-11.8	3.18672	6.29282e-17
																																	-11.8	3.21162	1.2568e-16	-11.8	3.21162	1.02282e-16	-11.8	3.21162	3.90123e-17
																																	-11.8	3.23651	7.75348e-17	-11.8	3.23651	6.24194e-17	-11.8	3.23651	2.40997e-17
																																	-11.8	3.26141	4.76725e-17	-11.8	3.26141	3.79857e-17	-11.8	3.26141	1.48349e-17
																																	-11.8	3.28631	2.92135e-17	-11.8	3.28631	2.30517e-17	-11.8	3.28631	9.09961e-18
																																	-11.8	3.3112	1.7842e-17	-11.8	3.3112	1.39499e-17	-11.8	3.3112	5.56207e-18
																																	-11.8	3.3361	1.08606e-17	-11.8	3.3361	8.41822e-18	-11.8	3.3361	3.3879e-18
																																	-11.8	3.361	6.58895e-18	-11.8	3.361	5.06581e-18	-11.8	3.361	2.0564e-18
																																	-11.8	3.38589	3.98409e-18	-11.8	3.38589	3.03985e-18	-11.8	3.38589	1.24387e-18
																																	-11.8	3.41079	2.40102e-18	-11.8	3.41079	1.81897e-18	-11.8	3.41079	7.49782e-19
																																	-11.8	3.43568	1.44217e-18	-11.8	3.43568	1.08533e-18	-11.8	3.43568	4.50392e-19
																																	-11.8	3.46058	8.63367e-19	-11.8	3.46058	6.45727e-19	-11.8	3.46058	2.69616e-19
																																	-11.8	3.48548	5.15146e-19	-11.8	3.48548	3.83074e-19	-11.8	3.48548	1.60844e-19
																																	-11.8	3.51037	3.06354e-19	-11.8	3.51037	2.26596e-19	-11.8	3.51037	9.56241e-20
																																	-11.8	3.53527	1.81583e-19	-11.8	3.53527	1.33643e-19	-11.8	3.53527	5.66551e-20
																																	-11.8	3.56017	1.07272e-19	-11.8	3.56017	7.85878e-20	-11.8	3.56017	3.3452e-20
																																	-11.8	3.58506	6.31622e-20	-11.8	3.58506	4.60753e-20	-11.8	3.58506	1.96843e-20
																																	-11.8	3.60996	3.70671e-20	-11.8	3.60996	2.69324e-20	-11.8	3.60996	1.15434e-20
																																	-11.8	3.63485	2.1681e-20	-11.8	3.63485	1.56952e-20	-11.8	3.63485	6.7463e-21
																																	-11.8	3.65975	1.26396e-20	-11.8	3.65975	9.11863e-21	-11.8	3.65975	3.92935e-21
																																	-11.8	3.68465	7.34422e-21	-11.8	3.68465	5.28149e-21	-11.8	3.68465	2.28086e-21
																																	-11.8	3.70954	4.25324e-21	-11.8	3.70954	3.04956e-21	-11.8	3.70954	1.31949e-21
																																	-11.8	3.73444	2.45502e-21	-11.8	3.73444	1.75534e-21	-11.8	3.73444	7.60746e-22
																																	-11.8	3.75934	1.41238e-21	-11.8	3.75934	1.00722e-21	-11.8	3.75934	4.37124e-22
																																	-11.8	3.78423	8.09854e-22	-11.8	3.78423	5.7612e-22	-11.8	3.78423	2.50325e-22
																																	-11.8	3.80913	4.62832e-22	-11.8	3.80913	3.28491e-22	-11.8	3.80913	1.42869e-22
																																	-11.8	3.83403	2.63632e-22	-11.8	3.83403	1.86701e-22	-11.8	3.83403	8.12663e-23
																																	-11.8	3.85892	1.4967e-22	-11.8	3.85892	1.05774e-22	-11.8	3.85892	4.60704e-23
																																	-11.8	3.88382	8.46891e-23	-11.8	3.88382	5.97328e-23	-11.8	3.88382	2.603e-23
																																	-11.8	3.90871	4.77616e-23	-11.8	3.90871	3.36235e-23	-11.8	3.90871	1.46578e-23
																																	-11.8	3.93361	2.68465e-23	-11.8	3.93361	1.88653e-23	-11.8	3.93361	8.22637e-24
																																	-11.8	3.95851	1.50402e-23	-11.8	3.95851	1.05505e-23	-11.8	3.95851	4.60143e-24
																																	-11.8	3.9834	8.39798e-24	-11.8	3.9834	5.88118e-24	-11.8	3.9834	2.56522e-24
																																	-11.8	4.0083	4.6736e-24	-11.8	4.0083	3.26765e-24	-11.8	4.0083	1.4253e-24
																																	-11.8	4.0332	2.59228e-24	-11.8	4.0332	1.8096e-24	-11.8	4.0332	7.89287e-25
																																	-11.8	4.05809	1.43307e-24	-11.8	4.05809	9.98856e-25	-11.8	4.05809	4.35627e-25
																																	-11.8	4.08299	7.89595e-25	-11.8	4.08299	5.49532e-25	-11.8	4.08299	2.39632e-25
																																	-11.8	4.10788	4.33604e-25	-11.8	4.10788	3.01337e-25	-11.8	4.10788	1.31379e-25
																																	-11.8	4.13278	2.37319e-25	-11.8	4.13278	1.64693e-25	-11.8	4.13278	7.17898e-26
																																	-11.8	4.15768	1.29456e-25	-11.8	4.15768	8.97147e-26	-11.8	4.15768	3.90977e-26
																																	-11.8	4.18257	7.03822e-26	-11.8	4.18257	4.87094e-26	-11.8	4.18257	2.12223e-26
																																	-11.8	4.20747	3.81373e-26	-11.8	4.20747	2.63586e-26	-11.8	4.20747	1.14812e-26
																																	-11.8	4.23236	2.05961e-26	-11.8	4.23236	1.42164e-26	-11.8	4.23236	6.19068e-27
																																	-11.8	4.25726	1.10858e-26	-11.8	4.25726	7.64216e-27	-11.8	4.25726	3.32693e-27
																																	-11.8	4.28216	5.94697e-27	-11.8	4.28216	4.09447e-27	-11.8	4.28216	1.78198e-27
																																	-11.8	4.30705	3.17957e-27	-11.8	4.30705	2.18642e-27	-11.8	4.30705	9.513e-28
																																	-11.8	4.33195	1.69428e-27	-11.8	4.33195	1.16365e-27	-11.8	4.33195	5.06159e-28
																																	-11.8	4.35685	8.99802e-28	-11.8	4.35685	6.17256e-28	-11.8	4.35685	2.68418e-28
																																	-11.8	4.38174	4.76267e-28	-11.8	4.38174	3.26332e-28	-11.8	4.38174	1.4187e-28
																																	-11.8	4.40664	2.51244e-28	-11.8	4.40664	1.71951e-28	-11.8	4.40664	7.47355e-29
																																	-11.8	4.43154	1.32094e-28	-11.8	4.43154	9.03022e-29	-11.8	4.43154	3.92389e-29
																																	-11.8	4.45643	6.92168e-29	-11.8	4.45643	4.72653e-29	-11.8	4.45643	2.05335e-29
																																	-11.8	4.48133	3.61477e-29	-11.8	4.48133	2.46567e-29	-11.8	4.48133	1.07093e-29
																																	-11.8	4.50622	1.88143e-29	-11.8	4.50622	1.28196e-29	-11.8	4.50622	5.56695e-30
																																	-11.8	4.53112	9.75967e-30	-11.8	4.53112	6.64296e-30	-11.8	4.53112	2.88421e-30
																																	-11.8	4.55602	5.04569e-30	-11.8	4.55602	3.4308e-30	-11.8	4.55602	1.48933e-30
																																	-11.8	4.58091	2.59982e-30	-11.8	4.58091	1.76594e-30	-11.8	4.58091	7.66494e-31
																																	-11.8	4.60581	1.33507e-30	-11.8	4.60581	9.05942e-31	-11.8	4.60581	3.9317e-31
																																	-11.8	4.6307	6.83286e-31	-11.8	4.6307	4.63202e-31	-11.8	4.6307	2.01005e-31
																																	-11.8	4.6556	3.48528e-31	-11.8	4.6556	2.3604e-31	-11.8	4.6556	1.0242e-31
																																	-11.8	4.6805	1.77177e-31	-11.8	4.6805	1.19879e-31	-11.8	4.6805	5.20138e-32
																																	-11.8	4.70539	8.97666e-32	-11.8	4.70539	6.06803e-32	-11.8	4.70539	2.63272e-32
																																	-11.8	4.73029	4.5327e-32	-11.8	4.73029	3.06122e-32	-11.8	4.73029	1.32814e-32
																																	-11.8	4.75519	2.28105e-32	-11.8	4.75519	1.53916e-32	-11.8	4.75519	6.67781e-33
																																	-11.8	4.78008	1.14405e-32	-11.8	4.78008	7.71285e-33	-11.8	4.78008	3.34639e-33
																																	-11.8	4.80498	5.71865e-33	-11.8	4.80498	3.85203e-33	-11.8	4.80498	1.67137e-33
																																	-11.8	4.82988	2.84888e-33	-11.8	4.82988	1.91737e-33	-11.8	4.82988	8.31993e-34
																																	-11.8	4.85477	1.41446e-33	-11.8	4.85477	9.51183e-34	-11.8	4.85477	4.12779e-34
																																	-11.8	4.87967	6.99905e-34	-11.8	4.87967	4.70288e-34	-11.8	4.87967	2.04111e-34
																																	-11.8	4.90456	3.45161e-34	-11.8	4.90456	2.31742e-34	-11.8	4.90456	1.00593e-34
																																	-11.8	4.92946	1.69644e-34	-11.8	4.92946	1.13812e-34	-11.8	4.92946	4.94104e-35
																																	-11.8	4.95436	8.30976e-35	-11.8	4.95436	5.57072e-35	-11.8	4.95436	2.41891e-35
																																	-11.8	4.97925	4.05669e-35	-11.8	4.97925	2.71754e-35	-11.8	4.97925	1.18024e-35
																																	-11.8	5.00415	1.97373e-35	-11.8	5.00415	1.32123e-35	-11.8	5.00415	5.73945e-36
																																	-11.8	5.02905	9.57055e-36	-11.8	5.02905	6.40214e-36	-11.8	5.02905	2.78176e-36
																																	-11.8	5.05394	4.62508e-36	-11.8	5.05394	3.09179e-36	-11.8	5.05394	1.34375e-36
																																	-11.8	5.07884	2.22759e-36	-11.8	5.07884	1.48811e-36	-11.8	5.07884	6.46941e-37
																																	-11.8	5.10373	1.06926e-36	-11.8	5.10373	7.1384e-37	-11.8	5.10373	3.10427e-37
																																	-11.8	5.12863	5.11521e-37	-11.8	5.12863	3.41276e-37	-11.8	5.12863	1.48457e-37
																																	-11.8	5.15353	2.4388e-37	-11.8	5.15353	1.62611e-37	-11.8	5.15353	7.07606e-38
																																	-11.8	5.17842	1.15884e-37	-11.8	5.17842	7.72208e-38	-11.8	5.17842	3.36147e-38
																																	-11.8	5.20332	5.48784e-38	-11.8	5.20332	3.65475e-38	-11.8	5.20332	1.59152e-38
																																	-11.8	5.22822	2.59008e-38	-11.8	5.22822	1.72393e-38	-11.8	5.22822	7.51004e-39
																																	-11.8	5.25311	1.21831e-38	-11.8	5.25311	8.10441e-39	-11.8	5.25311	3.53198e-39
																																	-11.8	5.27801	5.71128e-39	-11.8	5.27801	3.79719e-39	-11.8	5.27801	1.65554e-39
																																	-11.8	5.30291	2.66835e-39	-11.8	5.30291	1.77313e-39	-11.8	5.30291	7.73403e-40
																																	-11.8	5.3278	1.24247e-39	-11.8	5.3278	8.252e-40	-11.8	5.3278	3.60095e-40
																																	-11.8	5.3527	5.76581e-40	-11.8	5.3527	3.8275e-40	-11.8	5.3527	1.67099e-40
																																	-11.8	5.37759	2.66666e-40	-11.8	5.37759	1.76934e-40	-11.8	5.37759	7.72809e-41
																																	-11.8	5.40249	1.22916e-40	-11.8	5.40249	8.15161e-41	-11.8	5.40249	3.56218e-41
																																	-11.8	5.42739	5.64653e-41	-11.8	5.42739	3.74295e-41	-11.8	5.42739	1.63645e-41
																																	-11.8	5.45228	2.58516e-41	-11.8	5.45228	1.71286e-41	-11.8	5.45228	7.49258e-42
																																	-11.8	5.47718	1.17958e-41	-11.8	5.47718	7.81213e-42	-11.8	5.47718	3.41903e-42
																																	-11.8	5.50207	5.36412e-42	-11.8	5.50207	3.55103e-42	-11.8	5.50207	1.55495e-42
																																	-11.8	5.52697	2.4311e-42	-11.8	5.52697	1.6087e-42	-11.8	5.52697	7.0481e-43
																																	-11.8	5.55187	1.0981e-42	-11.8	5.55187	7.26332e-43	-11.8	5.55187	3.18397e-43
																																	-11.8	5.57676	4.94324e-43	-11.8	5.57676	3.26837e-43	-11.8	5.57676	1.43353e-43
																																	-11.8	5.60166	2.21777e-43	-11.8	5.60166	1.46577e-43	-11.8	5.60166	6.43258e-44
																																	-11.8	5.62656	9.91638e-44	-11.8	5.62656	6.55141e-44	-11.8	5.62656	2.87676e-44
																																	-11.8	5.65145	4.419e-44	-11.8	5.65145	2.91838e-44	-11.8	5.65145	1.28222e-44
																																	-11.8	5.67635	1.96258e-44	-11.8	5.67635	1.29564e-44	-11.8	5.67635	5.69586e-45
																																	-11.8	5.70125	8.68688e-45	-11.8	5.70125	5.73277e-45	-11.8	5.70125	2.52171e-45
																																	-11.8	5.72614	3.83207e-45	-11.8	5.72614	2.52802e-45	-11.8	5.72614	1.11268e-45
																																	-11.8	5.75104	1.68476e-45	-11.8	5.75104	1.11105e-45	-11.8	5.75104	4.8931e-46
																																	-11.8	5.77593	7.382e-46	-11.8	5.77593	4.86653e-46	-11.8	5.77593	2.14455e-46
																																	-11.8	5.80083	3.22362e-46	-11.8	5.80083	2.12443e-46	-11.8	5.80083	9.36753e-47
																																	-11.8	5.82573	1.40297e-46	-11.8	5.82573	9.24276e-47	-11.8	5.82573	4.07804e-47
																																	-11.8	5.85062	6.08533e-47	-11.8	5.85062	4.00771e-47	-11.8	5.85062	1.76935e-47
																																	-11.8	5.87552	2.6306e-47	-11.8	5.87552	1.73191e-47	-11.8	5.87552	7.65094e-48
																																	-11.8	5.90041	1.13333e-47	-11.8	5.90041	7.45915e-48	-11.8	5.90041	3.29724e-48
																																	-11.8	5.92531	4.86626e-48	-11.8	5.92531	3.20176e-48	-11.8	5.92531	1.41619e-48
																																	-11.8	5.95021	2.08241e-48	-11.8	5.95021	1.36969e-48	-11.8	5.95021	6.06221e-49
																																	-11.8	5.9751	8.88116e-49	-11.8	5.9751	5.8397e-49	-11.8	5.9751	2.58627e-49
																																	-11.8	6	3.77491e-49	-11.8	6	2.48138e-49	-11.8	6	1.09964e-49
																																	-11.75	0	0.01272	-11.75	0	0.02524	-11.75	0	0.00571
																																	-11.75	0.0249	0.02815	-11.75	0.0249	0.05591	-11.75	0.0249	0.01262
																																	-11.75	0.04979	0.03882	-11.75	0.04979	0.07736	-11.75	0.04979	0.01728
																																	-11.75	0.07469	0.04569	-11.75	0.07469	0.09154	-11.75	0.07469	0.02013
																																	-11.75	0.09959	0.05007	-11.75	0.09959	0.10108	-11.75	0.09959	0.02182
																																	-11.75	0.12448	0.05261	-11.75	0.12448	0.10723	-11.75	0.12448	0.02269
																																	-11.75	0.14938	0.05369	-11.75	0.14938	0.11078	-11.75	0.14938	0.02305
																																	-11.75	0.17427	0.05354	-11.75	0.17427	0.11222	-11.75	0.17427	0.02305
																																	-11.75	0.19917	0.05224	-11.75	0.19917	0.11186	-11.75	0.19917	0.02277
																																	-11.75	0.22407	0.04985	-11.75	0.22407	0.1099	-11.75	0.22407	0.0222
																																	-11.75	0.24896	0.04643	-11.75	0.24896	0.1066	-11.75	0.24896	0.02131
																																	-11.75	0.27386	0.04216	-11.75	0.27386	0.10226	-11.75	0.27386	0.0201
																																	-11.75	0.29875	0.03735	-11.75	0.29875	0.09725	-11.75	0.29875	0.01863
																																	-11.75	0.32365	0.03237	-11.75	0.32365	0.09192	-11.75	0.32365	0.01702
																																	-11.75	0.34855	0.02761	-11.75	0.34855	0.08652	-11.75	0.34855	0.01538
																																	-11.75	0.37344	0.02334	-11.75	0.37344	0.08125	-11.75	0.37344	0.01381
																																	-11.75	0.39834	0.01965	-11.75	0.39834	0.07641	-11.75	0.39834	0.01236
																																	-11.75	0.42324	0.01643	-11.75	0.42324	0.07256	-11.75	0.42324	0.01105
																																	-11.75	0.44813	0.01349	-11.75	0.44813	0.07046	-11.75	0.44813	0.00993
																																	-11.75	0.47303	0.01064	-11.75	0.47303	0.07078	-11.75	0.47303	0.00912
																																	-11.75	0.49793	0.00784	-11.75	0.49793	0.0736	-11.75	0.49793	0.00877
																																	-11.75	0.52282	0.00521	-11.75	0.52282	0.07822	-11.75	0.52282	0.00895
																																	-11.75	0.54772	0.00316	-11.75	0.54772	0.08341	-11.75	0.54772	0.00957
																																	-11.75	0.57261	0.0027	-11.75	0.57261	0.08793	-11.75	0.57261	0.01038
																																	-11.75	0.59751	0.00374	-11.75	0.59751	0.0908	-11.75	0.59751	0.01115
																																	-11.75	0.62241	0.00493	-11.75	0.62241	0.09144	-11.75	0.62241	0.0117
																																	-11.75	0.6473	0.00579	-11.75	0.6473	0.08964	-11.75	0.6473	0.01193
																																	-11.75	0.6722	0.00623	-11.75	0.6722	0.08552	-11.75	0.6722	0.0118
																																	-11.75	0.6971	0.0063	-11.75	0.6971	0.07944	-11.75	0.6971	0.01133
																																	-11.75	0.72199	0.00609	-11.75	0.72199	0.07191	-11.75	0.72199	0.01059
																																	-11.75	0.74689	0.00568	-11.75	0.74689	0.06351	-11.75	0.74689	0.00964
																																	-11.75	0.77178	0.00517	-11.75	0.77178	0.05479	-11.75	0.77178	0.00857
																																	-11.75	0.79668	0.00463	-11.75	0.79668	0.04623	-11.75	0.79668	0.00746
																																	-11.75	0.82158	0.00409	-11.75	0.82158	0.0382	-11.75	0.82158	0.00637
																																	-11.75	0.84647	0.0036	-11.75	0.84647	0.03098	-11.75	0.84647	0.00535
																																	-11.75	0.87137	0.00315	-11.75	0.87137	0.02471	-11.75	0.87137	0.00443
																																	-11.75	0.89627	0.00275	-11.75	0.89627	0.01943	-11.75	0.89627	0.00364
																																	-11.75	0.92116	0.00239	-11.75	0.92116	0.01512	-11.75	0.92116	0.00297
																																	-11.75	0.94606	0.00206	-11.75	0.94606	0.01168	-11.75	0.94606	0.00241
																																	-11.75	0.97095	0.00177	-11.75	0.97095	0.009	-11.75	0.97095	0.00196
																																	-11.75	0.99585	0.0015	-11.75	0.99585	0.00695	-11.75	0.99585	0.0016
																																	-11.75	1.02075	0.00126	-11.75	1.02075	0.0054	-11.75	1.02075	0.00131
																																	-11.75	1.04564	0.00105	-11.75	1.04564	0.00423	-11.75	1.04564	0.00107
																																	-11.75	1.07054	0.000867559	-11.75	1.07054	0.00335	-11.75	1.07054	0.000881165
																																	-11.75	1.09544	0.000709179	-11.75	1.09544	0.00268	-11.75	1.09544	0.000722382
																																	-11.75	1.12033	0.000574069	-11.75	1.12033	0.00216	-11.75	1.12033	0.000590556
																																	-11.75	1.14523	0.000460154	-11.75	1.14523	0.00175	-11.75	1.14523	0.000480616
																																	-11.75	1.17012	0.000365239	-11.75	1.17012	0.00142	-11.75	1.17012	0.000388861
																																	-11.75	1.19502	0.000287106	-11.75	1.19502	0.00115	-11.75	1.19502	0.000312493
																																	-11.75	1.21992	0.000223581	-11.75	1.21992	0.000928214	-11.75	1.21992	0.000249283
																																	-11.75	1.24481	0.000172588	-11.75	1.24481	0.000746262	-11.75	1.24481	0.000197363
																																	-11.75	1.26971	0.00013218	-11.75	1.26971	0.000596923	-11.75	1.26971	0.000155098
																																	-11.75	1.29461	0.000100569	-11.75	1.29461	0.000474851	-11.75	1.29461	0.000121029
																																	-11.75	1.3195	7.61422e-05	-11.75	1.3195	0.000375639	-11.75	1.3195	9.38424e-05
																																	-11.75	1.3444	5.74755e-05	-11.75	1.3444	0.000295536	-11.75	1.3444	7.23599e-05
																																	-11.75	1.36929	4.33399e-05	-11.75	1.36929	0.000231306	-11.75	1.36929	5.55401e-05
																																	-11.75	1.39419	3.27013e-05	-11.75	1.39419	0.000180151	-11.75	1.39419	4.24775e-05
																																	-11.75	1.41909	2.47142e-05	-11.75	1.41909	0.000139671	-11.75	1.41909	3.24002e-05
																																	-11.75	1.44398	1.87092e-05	-11.75	1.44398	0.000107825	-11.75	1.44398	2.46647e-05
																																	-11.75	1.46888	1.41731e-05	-11.75	1.46888	8.29076e-05	-11.75	1.46888	1.87461e-05
																																	-11.75	1.49378	1.07247e-05	-11.75	1.49378	6.35042e-05	-11.75	1.49378	1.42254e-05
																																	-11.75	1.51867	8.08715e-06	-11.75	1.51867	4.84613e-05	-11.75	1.51867	1.07743e-05
																																	-11.75	1.54357	6.06167e-06	-11.75	1.54357	3.6846e-05	-11.75	1.54357	8.13997e-06
																																	-11.75	1.56847	4.50508e-06	-11.75	1.56847	2.79115e-05	-11.75	1.56847	6.1293e-06
																																	-11.75	1.59336	3.31231e-06	-11.75	1.59336	2.10645e-05	-11.75	1.59336	4.59589e-06
																																	-11.75	1.61826	2.40413e-06	-11.75	1.61826	1.58363e-05	-11.75	1.61826	3.42864e-06
																																	-11.75	1.64315	1.71909e-06	-11.75	1.64315	1.18591e-05	-11.75	1.64315	2.54287e-06
																																	-11.75	1.66805	1.20849e-06	-11.75	1.66805	8.84496e-06	-11.75	1.66805	1.87364e-06
																																	-11.75	1.69295	8.33201e-07	-11.75	1.69295	6.56975e-06	-11.75	1.69295	1.3708e-06
																																	-11.75	1.71784	5.61721e-07	-11.75	1.71784	4.85928e-06	-11.75	1.71784	9.95412e-07
																																	-11.75	1.74274	3.68813e-07	-11.75	1.74274	3.5788e-06	-11.75	1.74274	7.17201e-07
																																	-11.75	1.76764	2.34482e-07	-11.75	1.76764	2.62435e-06	-11.75	1.76764	5.12615e-07
																																	-11.75	1.79253	1.43129e-07	-11.75	1.79253	1.91607e-06	-11.75	1.79253	3.63401e-07
																																	-11.75	1.81743	8.28314e-08	-11.75	1.81743	1.39284e-06	-11.75	1.81743	2.5549e-07
																																	-11.75	1.84232	4.47758e-08	-11.75	1.84232	1.00807e-06	-11.75	1.84232	1.78122e-07
																																	-11.75	1.86722	2.29758e-08	-11.75	1.86722	7.26406e-07	-11.75	1.86722	1.23136e-07
																																	-11.75	1.89212	1.40025e-08	-11.75	1.89212	5.21175e-07	-11.75	1.89212	8.43983e-08
																																	-11.75	1.91701	1.30656e-08	-11.75	1.91701	3.72318e-07	-11.75	1.91701	5.73493e-08
																																	-11.75	1.94191	1.3547e-08	-11.75	1.94191	2.64842e-07	-11.75	1.94191	3.86294e-08
																																	-11.75	1.9668	1.32096e-08	-11.75	1.9668	1.87596e-07	-11.75	1.9668	2.579e-08
																																	-11.75	1.9917	1.2081e-08	-11.75	1.9917	1.32326e-07	-11.75	1.9917	1.70638e-08
																																	-11.75	2.0166	1.05265e-08	-11.75	2.0166	9.29563e-08	-11.75	2.0166	1.11881e-08
																																	-11.75	2.04149	8.84596e-09	-11.75	2.04149	6.50353e-08	-11.75	2.04149	7.26948e-09
																																	-11.75	2.06639	7.2293e-09	-11.75	2.06639	4.53198e-08	-11.75	2.06639	4.68195e-09
																																	-11.75	2.09129	5.77837e-09	-11.75	2.09129	3.14578e-08	-11.75	2.09129	2.99107e-09
																																	-11.75	2.11618	4.53531e-09	-11.75	2.11618	2.17524e-08	-11.75	2.11618	1.89824e-09
																																	-11.75	2.14108	3.50557e-09	-11.75	2.14108	1.49853e-08	-11.75	2.14108	1.20014e-09
																																	-11.75	2.16598	2.67424e-09	-11.75	2.16598	1.0286e-08	-11.75	2.16598	7.59627e-10
																																	-11.75	2.19087	2.01672e-09	-11.75	2.19087	7.03557e-09	-11.75	2.19087	4.84973e-10
																																	-11.75	2.21577	1.50542e-09	-11.75	2.21577	4.79593e-09	-11.75	2.21577	3.15362e-10
																																	-11.75	2.24066	1.11347e-09	-11.75	2.24066	3.25854e-09	-11.75	2.24066	2.10857e-10
																																	-11.75	2.26556	8.16707e-10	-11.75	2.26556	2.20703e-09	-11.75	2.26556	1.45689e-10
																																	-11.75	2.29046	5.94448e-10	-11.75	2.29046	1.49034e-09	-11.75	2.29046	1.03782e-10
																																	-11.75	2.31535	4.29597e-10	-11.75	2.31535	1.0035e-09	-11.75	2.31535	7.55966e-11
																																	-11.75	2.34025	3.08397e-10	-11.75	2.34025	6.73848e-10	-11.75	2.34025	5.57496e-11
																																	-11.75	2.36515	2.20003e-10	-11.75	2.36515	4.51314e-10	-11.75	2.36515	4.12763e-11
																																	-11.75	2.39004	1.56013e-10	-11.75	2.39004	3.01525e-10	-11.75	2.39004	3.05065e-11
																																	-11.75	2.41494	1.10009e-10	-11.75	2.41494	2.00977e-10	-11.75	2.41494	2.24305e-11
																																	-11.75	2.43983	7.71501e-11	-11.75	2.43983	1.33656e-10	-11.75	2.43983	1.63781e-11
																																	-11.75	2.46473	5.38242e-11	-11.75	2.46473	8.86937e-11	-11.75	2.46473	1.18664e-11
																																	-11.75	2.48963	3.73621e-11	-11.75	2.48963	5.87331e-11	-11.75	2.48963	8.52919e-12
																																	-11.75	2.51452	2.58089e-11	-11.75	2.51452	3.88132e-11	-11.75	2.51452	6.08227e-12
																																	-11.75	2.53942	1.77442e-11	-11.75	2.53942	2.55971e-11	-11.75	2.53942	4.30422e-12
																																	-11.75	2.56432	1.21435e-11	-11.75	2.56432	1.68468e-11	-11.75	2.56432	3.02363e-12
																																	-11.75	2.58921	8.27353e-12	-11.75	2.58921	1.1065e-11	-11.75	2.58921	2.10916e-12
																																	-11.75	2.61411	5.61227e-12	-11.75	2.61411	7.25225e-12	-11.75	2.61411	1.46144e-12
																																	-11.75	2.639	3.7908e-12	-11.75	2.639	4.74309e-12	-11.75	2.639	1.00618e-12
																																	-11.75	2.6639	2.54981e-12	-11.75	2.6639	3.09519e-12	-11.75	2.6639	6.88532e-13
																																	-11.75	2.6888	1.70806e-12	-11.75	2.6888	2.0152e-12	-11.75	2.6888	4.68426e-13
																																	-11.75	2.71369	1.1396e-12	-11.75	2.71369	1.30894e-12	-11.75	2.71369	3.16909e-13
																																	-11.75	2.73859	7.57333e-13	-11.75	2.73859	8.48115e-13	-11.75	2.73859	2.13257e-13
																																	-11.75	2.76349	5.01341e-13	-11.75	2.76349	5.48142e-13	-11.75	2.76349	1.42769e-13
																																	-11.75	2.78838	3.30611e-13	-11.75	2.78838	3.53346e-13	-11.75	2.78838	9.51067e-14
																																	-11.75	2.81328	2.17203e-13	-11.75	2.81328	2.27168e-13	-11.75	2.81328	6.30533e-14
																																	-11.75	2.83817	1.42167e-13	-11.75	2.83817	1.45649e-13	-11.75	2.83817	4.16093e-14
																																	-11.75	2.86307	9.27119e-14	-11.75	2.86307	9.3123e-14	-11.75	2.86307	2.73351e-14
																																	-11.75	2.88797	6.02417e-14	-11.75	2.88797	5.93719e-14	-11.75	2.88797	1.78794e-14
																																	-11.75	2.91286	3.90032e-14	-11.75	2.91286	3.77453e-14	-11.75	2.91286	1.1645e-14
																																	-11.75	2.93776	2.51628e-14	-11.75	2.93776	2.39273e-14	-11.75	2.93776	7.55302e-15
																																	-11.75	2.96266	1.61767e-14	-11.75	2.96266	1.5124e-14	-11.75	2.96266	4.8791e-15
																																	-11.75	2.98755	1.03634e-14	-11.75	2.98755	9.53191e-15	-11.75	2.98755	3.1393e-15
																																	-11.75	3.01245	6.61617e-15	-11.75	3.01245	5.99007e-15	-11.75	3.01245	2.01201e-15
																																	-11.75	3.03734	4.20936e-15	-11.75	3.03734	3.7534e-15	-11.75	3.03734	1.28458e-15
																																	-11.75	3.06224	2.66894e-15	-11.75	3.06224	2.34511e-15	-11.75	3.06224	8.17058e-16
																																	-11.75	3.08714	1.68648e-15	-11.75	3.08714	1.46102e-15	-11.75	3.08714	5.17755e-16
																																	-11.75	3.11203	1.06207e-15	-11.75	3.11203	9.07621e-16	-11.75	3.11203	3.26886e-16
																																	-11.75	3.13693	6.66583e-16	-11.75	3.13693	5.62238e-16	-11.75	3.13693	2.05629e-16
																																	-11.75	3.16183	4.16962e-16	-11.75	3.16183	3.47303e-16	-11.75	3.16183	1.28886e-16
																																	-11.75	3.18672	2.59945e-16	-11.75	3.18672	2.13932e-16	-11.75	3.18672	8.04953e-17
																																	-11.75	3.21162	1.61515e-16	-11.75	3.21162	1.3141e-16	-11.75	3.21162	5.00946e-17
																																	-11.75	3.23651	1.00022e-16	-11.75	3.23651	8.04959e-17	-11.75	3.23651	3.10653e-17
																																	-11.75	3.26141	6.17355e-17	-11.75	3.26141	4.91713e-17	-11.75	3.26141	1.9197e-17
																																	-11.75	3.28631	3.79778e-17	-11.75	3.28631	2.99534e-17	-11.75	3.28631	1.18215e-17
																																	-11.75	3.3112	2.32854e-17	-11.75	3.3112	1.81961e-17	-11.75	3.3112	7.25433e-18
																																	-11.75	3.3361	1.42298e-17	-11.75	3.3361	1.10231e-17	-11.75	3.3361	4.43623e-18
																																	-11.75	3.361	8.66715e-18	-11.75	3.361	6.65923e-18	-11.75	3.361	2.70351e-18
																																	-11.75	3.38589	5.26162e-18	-11.75	3.38589	4.01174e-18	-11.75	3.38589	1.64188e-18
																																	-11.75	3.41079	3.18367e-18	-11.75	3.41079	2.41004e-18	-11.75	3.41079	9.93711e-19
																																	-11.75	3.43568	1.92002e-18	-11.75	3.43568	1.44375e-18	-11.75	3.43568	5.99359e-19
																																	-11.75	3.46058	1.15412e-18	-11.75	3.46058	8.62443e-19	-11.75	3.46058	3.60268e-19
																																	-11.75	3.48548	6.91459e-19	-11.75	3.48548	5.13721e-19	-11.75	3.48548	2.15814e-19
																																	-11.75	3.51037	4.12907e-19	-11.75	3.51037	3.05123e-19	-11.75	3.51037	1.2884e-19
																																	-11.75	3.53527	2.45759e-19	-11.75	3.53527	1.80701e-19	-11.75	3.53527	7.66553e-20
																																	-11.75	3.56017	1.45794e-19	-11.75	3.56017	1.06704e-19	-11.75	3.56017	4.54525e-20
																																	-11.75	3.58506	8.62068e-20	-11.75	3.58506	6.28224e-20	-11.75	3.58506	2.68596e-20
																																	-11.75	3.60996	5.08062e-20	-11.75	3.60996	3.68773e-20	-11.75	3.60996	1.58186e-20
																																	-11.75	3.63485	2.98446e-20	-11.75	3.63485	2.15825e-20	-11.75	3.63485	9.28474e-21
																																	-11.75	3.65975	1.74738e-20	-11.75	3.65975	1.25931e-20	-11.75	3.65975	5.43132e-21
																																	-11.75	3.68465	1.01972e-20	-11.75	3.68465	7.32554e-21	-11.75	3.68465	3.16648e-21
																																	-11.75	3.70954	5.93133e-21	-11.75	3.70954	4.2483e-21	-11.75	3.70954	1.83987e-21
																																	-11.75	3.73444	3.4387e-21	-11.75	3.73444	2.45612e-21	-11.75	3.73444	1.06546e-21
																																	-11.75	3.75934	1.98706e-21	-11.75	3.75934	1.41558e-21	-11.75	3.75934	6.14939e-22
																																	-11.75	3.78423	1.14446e-21	-11.75	3.78423	8.13319e-22	-11.75	3.78423	3.5373e-22
																																	-11.75	3.80913	6.56996e-22	-11.75	3.80913	4.65825e-22	-11.75	3.80913	2.02796e-22
																																	-11.75	3.83403	3.75922e-22	-11.75	3.83403	2.65957e-22	-11.75	3.83403	1.15877e-22
																																	-11.75	3.85892	2.1439e-22	-11.75	3.85892	1.51364e-22	-11.75	3.85892	6.59912e-23
																																	-11.75	3.88382	1.21866e-22	-11.75	3.88382	8.58711e-23	-11.75	3.88382	3.74566e-23
																																	-11.75	3.90871	6.90448e-23	-11.75	3.90871	4.85604e-23	-11.75	3.90871	2.11897e-23
																																	-11.75	3.93361	3.89897e-23	-11.75	3.93361	2.73729e-23	-11.75	3.93361	1.19476e-23
																																	-11.75	3.95851	2.19452e-23	-11.75	3.95851	1.53802e-23	-11.75	3.95851	6.71414e-24
																																	-11.75	3.9834	1.23111e-23	-11.75	3.9834	8.61385e-24	-11.75	3.9834	3.76064e-24
																																	-11.75	4.0083	6.8837e-24	-11.75	4.0083	4.80868e-24	-11.75	4.0083	2.09939e-24
																																	-11.75	4.0332	3.83632e-24	-11.75	4.0332	2.67573e-24	-11.75	4.0332	1.16812e-24
																																	-11.75	4.05809	2.13095e-24	-11.75	4.05809	1.48404e-24	-11.75	4.05809	6.47801e-25
																																	-11.75	4.08299	1.17977e-24	-11.75	4.08299	8.20413e-25	-11.75	4.08299	3.58064e-25
																																	-11.75	4.10788	6.51011e-25	-11.75	4.10788	4.52064e-25	-11.75	4.10788	1.97262e-25
																																	-11.75	4.13278	3.58048e-25	-11.75	4.13278	2.48282e-25	-11.75	4.13278	1.08316e-25
																																	-11.75	4.15768	1.96271e-25	-11.75	4.15768	1.35915e-25	-11.75	4.15768	5.92798e-26
																																	-11.75	4.18257	1.07235e-25	-11.75	4.18257	7.41588e-26	-11.75	4.18257	3.23361e-26
																																	-11.75	4.20747	5.83949e-26	-11.75	4.20747	4.03303e-26	-11.75	4.20747	1.75806e-26
																																	-11.75	4.23236	3.16938e-26	-11.75	4.23236	2.18611e-26	-11.75	4.23236	9.5268e-27
																																	-11.75	4.25726	1.71448e-26	-11.75	4.25726	1.18109e-26	-11.75	4.25726	5.1455e-27
																																	-11.75	4.28216	9.24382e-27	-11.75	4.28216	6.36005e-27	-11.75	4.28216	2.76998e-27
																																	-11.75	4.30705	4.96738e-27	-11.75	4.30705	3.41355e-27	-11.75	4.30705	1.48625e-27
																																	-11.75	4.33195	2.66048e-27	-11.75	4.33195	1.82607e-27	-11.75	4.33195	7.94831e-28
																																	-11.75	4.35685	1.4202e-27	-11.75	4.35685	9.73633e-28	-11.75	4.35685	4.23668e-28
																																	-11.75	4.38174	7.55605e-28	-11.75	4.38174	5.17412e-28	-11.75	4.38174	2.25084e-28
																																	-11.75	4.40664	4.00677e-28	-11.75	4.40664	2.74057e-28	-11.75	4.40664	1.19187e-28
																																	-11.75	4.43154	2.11762e-28	-11.75	4.43154	1.4468e-28	-11.75	4.43154	6.29049e-29
																																	-11.75	4.45643	1.11547e-28	-11.75	4.45643	7.61267e-29	-11.75	4.45643	3.30907e-29
																																	-11.75	4.48133	5.85621e-29	-11.75	4.48133	3.99234e-29	-11.75	4.48133	1.73498e-29
																																	-11.75	4.50622	3.06429e-29	-11.75	4.50622	2.08678e-29	-11.75	4.50622	9.06675e-30
																																	-11.75	4.53112	1.59806e-29	-11.75	4.53112	1.08714e-29	-11.75	4.53112	4.72254e-30
																																	-11.75	4.55602	8.30634e-30	-11.75	4.55602	5.6449e-30	-11.75	4.55602	2.45169e-30
																																	-11.75	4.58091	4.30305e-30	-11.75	4.58091	2.92135e-30	-11.75	4.58091	1.2686e-30
																																	-11.75	4.60581	2.22174e-30	-11.75	4.60581	1.50685e-30	-11.75	4.60581	6.54256e-31
																																	-11.75	4.6307	1.1433e-30	-11.75	4.6307	7.74662e-31	-11.75	4.6307	3.36309e-31
																																	-11.75	4.6556	5.86374e-31	-11.75	4.6556	3.96929e-31	-11.75	4.6556	1.72304e-31
																																	-11.75	4.6805	2.99736e-31	-11.75	4.6805	2.02707e-31	-11.75	4.6805	8.79867e-32
																																	-11.75	4.70539	1.52705e-31	-11.75	4.70539	1.03177e-31	-11.75	4.70539	4.47822e-32
																																	-11.75	4.73029	7.75379e-32	-11.75	4.73029	5.23422e-32	-11.75	4.73029	2.27174e-32
																																	-11.75	4.75519	3.92394e-32	-11.75	4.75519	2.64653e-32	-11.75	4.75519	1.14862e-32
																																	-11.75	4.78008	1.97915e-32	-11.75	4.78008	1.33369e-32	-11.75	4.78008	5.78844e-33
																																	-11.75	4.80498	9.94909e-33	-11.75	4.80498	6.6987e-33	-11.75	4.80498	2.90743e-33
																																	-11.75	4.82988	4.98464e-33	-11.75	4.82988	3.35336e-33	-11.75	4.82988	1.45553e-33
																																	-11.75	4.85477	2.48904e-33	-11.75	4.85477	1.67311e-33	-11.75	4.85477	7.26271e-34
																																	-11.75	4.87967	1.23873e-33	-11.75	4.87967	8.31997e-34	-11.75	4.87967	3.61193e-34
																																	-11.75	4.90456	6.1442e-34	-11.75	4.90456	4.12357e-34	-11.75	4.90456	1.79037e-34
																																	-11.75	4.92946	3.0374e-34	-11.75	4.92946	2.03694e-34	-11.75	4.92946	8.84524e-35
																																	-11.75	4.95436	1.49653e-34	-11.75	4.95436	1.00285e-34	-11.75	4.95436	4.35551e-35
																																	-11.75	4.97925	7.34874e-35	-11.75	4.97925	4.92095e-35	-11.75	4.97925	2.13763e-35
																																	-11.75	5.00415	3.59656e-35	-11.75	5.00415	2.40666e-35	-11.75	5.00415	1.04565e-35
																																	-11.75	5.02905	1.75431e-35	-11.75	5.02905	1.17309e-35	-11.75	5.02905	5.09802e-36
																																	-11.75	5.05394	8.52847e-36	-11.75	5.05394	5.69905e-36	-11.75	5.05394	2.4773e-36
																																	-11.75	5.07884	4.13221e-36	-11.75	5.07884	2.75947e-36	-11.75	5.07884	1.19983e-36
																																	-11.75	5.10373	1.99544e-36	-11.75	5.10373	1.33168e-36	-11.75	5.10373	5.79185e-37
																																	-11.75	5.12863	9.60371e-37	-11.75	5.12863	6.40515e-37	-11.75	5.12863	2.78662e-37
																																	-11.75	5.15353	4.60665e-37	-11.75	5.15353	3.0705e-37	-11.75	5.15353	1.33628e-37
																																	-11.75	5.17842	2.2023e-37	-11.75	5.17842	1.46704e-37	-11.75	5.17842	6.3867e-38
																																	-11.75	5.20332	1.04933e-37	-11.75	5.20332	6.98594e-38	-11.75	5.20332	3.04239e-38
																																	-11.75	5.22822	4.98306e-38	-11.75	5.22822	3.31559e-38	-11.75	5.22822	1.44448e-38
																																	-11.75	5.25311	2.35843e-38	-11.75	5.25311	1.56837e-38	-11.75	5.25311	6.83548e-39
																																	-11.75	5.27801	1.11249e-38	-11.75	5.27801	7.39411e-39	-11.75	5.27801	3.22392e-39
																																	-11.75	5.30291	5.23015e-39	-11.75	5.30291	3.47437e-39	-11.75	5.30291	1.5155e-39
																																	-11.75	5.3278	2.45062e-39	-11.75	5.3278	1.62711e-39	-11.75	5.3278	7.10045e-40
																																	-11.75	5.3527	1.14442e-39	-11.75	5.3527	7.59466e-40	-11.75	5.3527	3.31568e-40
																																	-11.75	5.37759	5.32646e-40	-11.75	5.37759	3.53306e-40	-11.75	5.37759	1.54318e-40
																																	-11.75	5.40249	2.4708e-40	-11.75	5.40249	1.63812e-40	-11.75	5.40249	7.1584e-41
																																	-11.75	5.42739	1.1423e-40	-11.75	5.42739	7.56987e-41	-11.75	5.42739	3.30957e-41
																																	-11.75	5.45228	5.26346e-41	-11.75	5.45228	3.48645e-41	-11.75	5.45228	1.52504e-41
																																	-11.75	5.47718	2.41716e-41	-11.75	5.47718	1.6004e-41	-11.75	5.47718	7.00404e-42
																																	-11.75	5.50207	1.10634e-41	-11.75	5.50207	7.32189e-42	-11.75	5.50207	3.20605e-42
																																	-11.75	5.52697	5.04676e-42	-11.75	5.52697	3.33863e-42	-11.75	5.52697	1.46267e-42
																																	-11.75	5.55187	2.29448e-42	-11.75	5.55187	1.51727e-42	-11.75	5.55187	6.65081e-43
																																	-11.75	5.57676	1.03968e-42	-11.75	5.57676	6.87239e-43	-11.75	5.57676	3.0141e-43
																																	-11.75	5.60166	4.69531e-43	-11.75	5.60166	3.10243e-43	-11.75	5.60166	1.36142e-43
																																	-11.75	5.62656	2.11335e-43	-11.75	5.62656	1.39587e-43	-11.75	5.62656	6.1289e-44
																																	-11.75	5.65145	9.48039e-44	-11.75	5.65145	6.25949e-44	-11.75	5.65145	2.74994e-44
																																	-11.75	5.67635	4.23864e-44	-11.75	5.67635	2.79757e-44	-11.75	5.67635	1.22975e-44
																																	-11.75	5.70125	1.88874e-44	-11.75	5.70125	1.24615e-44	-11.75	5.70125	5.48103e-45
																																	-11.75	5.72614	8.38809e-45	-11.75	5.72614	5.53237e-45	-11.75	5.72614	2.43477e-45
																																	-11.75	5.75104	3.71279e-45	-11.75	5.75104	2.44793e-45	-11.75	5.75104	1.07797e-45
																																	-11.75	5.77593	1.63789e-45	-11.75	5.77593	1.07953e-45	-11.75	5.77593	4.75668e-46
																																	-11.75	5.80083	7.20133e-46	-11.75	5.80083	4.74483e-46	-11.75	5.80083	2.09196e-46
																																	-11.75	5.82573	3.15564e-46	-11.75	5.82573	2.07852e-46	-11.75	5.82573	9.16961e-47
																																	-11.75	5.85062	1.37819e-46	-11.75	5.85062	9.07475e-47	-11.75	5.85062	4.00589e-47
																																	-11.75	5.87552	5.99896e-47	-11.75	5.87552	3.94878e-47	-11.75	5.87552	1.7442e-47
																																	-11.75	5.90041	2.60249e-47	-11.75	5.90041	1.71253e-47	-11.75	5.90041	7.56906e-48
																																	-11.75	5.92531	1.12525e-47	-11.75	5.92531	7.40223e-48	-11.75	5.92531	3.27368e-48
																																	-11.75	5.95021	4.849e-48	-11.75	5.95021	3.18884e-48	-11.75	5.95021	1.41117e-48
																																	-11.75	5.9751	2.08259e-48	-11.75	5.9751	1.36915e-48	-11.75	5.9751	6.06276e-49
																																	-11.75	6	8.91455e-49	-11.75	6	5.85889e-49	-11.75	6	2.59602e-49
																																	-11.7	0	0.01272	-11.7	0	0.02524	-11.7	0	0.00571
																																	-11.7	0.0249	0.02815	-11.7	0.0249	0.05591	-11.7	0.0249	0.01262
																																	-11.7	0.04979	0.03883	-11.7	0.04979	0.07737	-11.7	0.04979	0.01728
																																	-11.7	0.07469	0.0457	-11.7	0.07469	0.09156	-11.7	0.07469	0.02014
																																	-11.7	0.09959	0.0501	-11.7	0.09959	0.10113	-11.7	0.09959	0.02183
																																	-11.7	0.12448	0.05265	-11.7	0.12448	0.10731	-11.7	0.12448	0.02271
																																	-11.7	0.14938	0.05375	-11.7	0.14938	0.11089	-11.7	0.14938	0.02307
																																	-11.7	0.17427	0.05361	-11.7	0.17427	0.11238	-11.7	0.17427	0.02308
																																	-11.7	0.19917	0.05234	-11.7	0.19917	0.11207	-11.7	0.19917	0.02281
																																	-11.7	0.22407	0.04997	-11.7	0.22407	0.11016	-11.7	0.22407	0.02225
																																	-11.7	0.24896	0.04656	-11.7	0.24896	0.1069	-11.7	0.24896	0.02137
																																	-11.7	0.27386	0.04231	-11.7	0.27386	0.10261	-11.7	0.27386	0.02017
																																	-11.7	0.29875	0.03751	-11.7	0.29875	0.09764	-11.7	0.29875	0.01871
																																	-11.7	0.32365	0.03253	-11.7	0.32365	0.09234	-11.7	0.32365	0.0171
																																	-11.7	0.34855	0.02777	-11.7	0.34855	0.08696	-11.7	0.34855	0.01546
																																	-11.7	0.37344	0.02349	-11.7	0.37344	0.0817	-11.7	0.37344	0.01389
																																	-11.7	0.39834	0.01979	-11.7	0.39834	0.07688	-11.7	0.39834	0.01244
																																	-11.7	0.42324	0.01657	-11.7	0.42324	0.07302	-11.7	0.42324	0.01113
																																	-11.7	0.44813	0.01361	-11.7	0.44813	0.07093	-11.7	0.44813	0.01001
																																	-11.7	0.47303	0.01074	-11.7	0.47303	0.07129	-11.7	0.47303	0.00919
																																	-11.7	0.49793	0.00792	-11.7	0.49793	0.07418	-11.7	0.49793	0.00884
																																	-11.7	0.52282	0.00526	-11.7	0.52282	0.07889	-11.7	0.52282	0.00903
																																	-11.7	0.54772	0.00318	-11.7	0.54772	0.08421	-11.7	0.54772	0.00965
																																	-11.7	0.57261	0.00271	-11.7	0.57261	0.08886	-11.7	0.57261	0.01048
																																	-11.7	0.59751	0.00377	-11.7	0.59751	0.09187	-11.7	0.59751	0.01127
																																	-11.7	0.62241	0.00498	-11.7	0.62241	0.09261	-11.7	0.62241	0.01184
																																	-11.7	0.6473	0.00586	-11.7	0.6473	0.09089	-11.7	0.6473	0.01209
																																	-11.7	0.6722	0.00632	-11.7	0.6722	0.08681	-11.7	0.6722	0.01197
																																	-11.7	0.6971	0.0064	-11.7	0.6971	0.08073	-11.7	0.6971	0.01151
																																	-11.7	0.72199	0.00619	-11.7	0.72199	0.07316	-11.7	0.72199	0.01077
																																	-11.7	0.74689	0.00578	-11.7	0.74689	0.06469	-11.7	0.74689	0.00981
																																	-11.7	0.77178	0.00526	-11.7	0.77178	0.05587	-11.7	0.77178	0.00873
																																	-11.7	0.79668	0.00471	-11.7	0.79668	0.04719	-11.7	0.79668	0.00761
																																	-11.7	0.82158	0.00418	-11.7	0.82158	0.03904	-11.7	0.82158	0.0065
																																	-11.7	0.84647	0.00368	-11.7	0.84647	0.0317	-11.7	0.84647	0.00547
																																	-11.7	0.87137	0.00322	-11.7	0.87137	0.02531	-11.7	0.87137	0.00454
																																	-11.7	0.89627	0.00282	-11.7	0.89627	0.01992	-11.7	0.89627	0.00373
																																	-11.7	0.92116	0.00245	-11.7	0.92116	0.01551	-11.7	0.92116	0.00304
																																	-11.7	0.94606	0.00211	-11.7	0.94606	0.01199	-11.7	0.94606	0.00248
																																	-11.7	0.97095	0.00181	-11.7	0.97095	0.00925	-11.7	0.97095	0.00202
																																	-11.7	0.99585	0.00154	-11.7	0.99585	0.00715	-11.7	0.99585	0.00165
																																	-11.7	1.02075	0.0013	-11.7	1.02075	0.00556	-11.7	1.02075	0.00135
																																	-11.7	1.04564	0.00108	-11.7	1.04564	0.00436	-11.7	1.04564	0.00111
																																	-11.7	1.07054	0.000896043	-11.7	1.07054	0.00346	-11.7	1.07054	0.000909242
																																	-11.7	1.09544	0.000733569	-11.7	1.09544	0.00277	-11.7	1.09544	0.000746467
																																	-11.7	1.12033	0.000594725	-11.7	1.12033	0.00224	-11.7	1.12033	0.00061117
																																	-11.7	1.14523	0.000477452	-11.7	1.14523	0.00181	-11.7	1.14523	0.000498177
																																	-11.7	1.17012	0.000379562	-11.7	1.17012	0.00147	-11.7	1.17012	0.000403723
																																	-11.7	1.19502	0.000298831	-11.7	1.19502	0.00119	-11.7	1.19502	0.000324971
																																	-11.7	1.21992	0.000233074	-11.7	1.21992	0.000965293	-11.7	1.21992	0.000259668
																																	-11.7	1.24481	0.00018019	-11.7	1.24481	0.000777393	-11.7	1.24481	0.000205927
																																	-11.7	1.26971	0.000138208	-11.7	1.26971	0.000622893	-11.7	1.26971	0.000162097
																																	-11.7	1.29461	0.000105308	-11.7	1.29461	0.000496367	-11.7	1.29461	0.000126699
																																	-11.7	1.3195	7.9841e-05	-11.7	1.3195	0.00039334	-11.7	1.3195	9.83981e-05
																																	-11.7	1.3444	6.03497e-05	-11.7	1.3444	0.00031	-11.7	1.3444	7.5995e-05
																																	-11.7	1.36929	4.55692e-05	-11.7	1.36929	0.000243049	-11.7	1.36929	5.84238e-05
																																	-11.7	1.39419	3.44318e-05	-11.7	1.39419	0.000189629	-11.7	1.39419	4.47548e-05
																																	-11.7	1.41909	2.60614e-05	-11.7	1.41909	0.000147278	-11.7	1.41909	3.41927e-05
																																	-11.7	1.44398	1.97619e-05	-11.7	1.44398	0.000113901	-11.7	1.44398	2.60727e-05
																																	-11.7	1.46888	1.49983e-05	-11.7	1.46888	8.77374e-05	-11.7	1.46888	1.98505e-05
																																	-11.7	1.49378	1.13724e-05	-11.7	1.49378	6.73271e-05	-11.7	1.49378	1.50907e-05
																																	-11.7	1.51867	8.5947e-06	-11.7	1.51867	5.14747e-05	-11.7	1.51867	1.14514e-05
																																	-11.7	1.54357	6.45757e-06	-11.7	1.54357	3.92118e-05	-11.7	1.54357	8.66877e-06
																																	-11.7	1.56847	4.81151e-06	-11.7	1.56847	2.97613e-05	-11.7	1.56847	6.54112e-06
																																	-11.7	1.59336	3.54699e-06	-11.7	1.59336	2.2505e-05	-11.7	1.59336	4.91535e-06
																																	-11.7	1.61826	2.58156e-06	-11.7	1.61826	1.69534e-05	-11.7	1.61826	3.67521e-06
																																	-11.7	1.64315	1.85123e-06	-11.7	1.64315	1.27217e-05	-11.7	1.64315	2.73204e-06
																																	-11.7	1.66805	1.30522e-06	-11.7	1.66805	9.50823e-06	-11.7	1.66805	2.01778e-06
																																	-11.7	1.69295	9.02639e-07	-11.7	1.69295	7.07742e-06	-11.7	1.69295	1.4798e-06
																																	-11.7	1.71784	6.10468e-07	-11.7	1.71784	5.24608e-06	-11.7	1.71784	1.07718e-06
																																	-11.7	1.74274	4.02148e-07	-11.7	1.74274	3.87212e-06	-11.7	1.74274	7.7803e-07
																																	-11.7	1.76764	2.56557e-07	-11.7	1.76764	2.84575e-06	-11.7	1.76764	5.57474e-07
																																	-11.7	1.79253	1.57144e-07	-11.7	1.79253	2.08238e-06	-11.7	1.79253	3.96192e-07
																																	-11.7	1.81743	9.1204e-08	-11.7	1.81743	1.51717e-06	-11.7	1.81743	2.79247e-07
																																	-11.7	1.84232	4.92828e-08	-11.7	1.84232	1.10057e-06	-11.7	1.84232	1.95179e-07
																																	-11.7	1.86722	2.49009e-08	-11.7	1.86722	7.94908e-07	-11.7	1.86722	1.35271e-07
																																	-11.7	1.89212	1.45224e-08	-11.7	1.89212	5.7166e-07	-11.7	1.89212	9.2953e-08
																																	-11.7	1.91701	1.35279e-08	-11.7	1.91701	4.09351e-07	-11.7	1.91701	6.33242e-08
																																	-11.7	1.94191	1.43257e-08	-11.7	1.94191	2.91881e-07	-11.7	1.94191	4.27633e-08
																																	-11.7	1.9668	1.41741e-08	-11.7	1.9668	2.07247e-07	-11.7	1.9668	2.86227e-08
																																	-11.7	1.9917	1.30874e-08	-11.7	1.9917	1.46543e-07	-11.7	1.9917	1.89858e-08
																																	-11.7	2.0166	1.14824e-08	-11.7	2.0166	1.03196e-07	-11.7	2.0166	1.24789e-08
																																	-11.7	2.04149	9.70197e-09	-11.7	2.04149	7.23777e-08	-11.7	2.04149	8.12732e-09
																																	-11.7	2.06639	7.96546e-09	-11.7	2.06639	5.05619e-08	-11.7	2.06639	5.24589e-09
																																	-11.7	2.09129	6.39279e-09	-11.7	2.09129	3.51845e-08	-11.7	2.09129	3.35775e-09
																																	-11.7	2.11618	5.03632e-09	-11.7	2.11618	2.43907e-08	-11.7	2.11618	2.13411e-09
																																	-11.7	2.14108	3.90649e-09	-11.7	2.14108	1.68455e-08	-11.7	2.14108	1.35043e-09
																																	-11.7	2.16598	2.99005e-09	-11.7	2.16598	1.15924e-08	-11.7	2.16598	8.54756e-10
																																	-11.7	2.19087	2.26218e-09	-11.7	2.19087	7.94944e-09	-11.7	2.19087	5.45178e-10
																																	-11.7	2.21577	1.69397e-09	-11.7	2.21577	5.43286e-09	-11.7	2.21577	3.53886e-10
																																	-11.7	2.24066	1.25682e-09	-11.7	2.24066	3.70086e-09	-11.7	2.24066	2.36171e-10
																																	-11.7	2.26556	9.24674e-10	-11.7	2.26556	2.51314e-09	-11.7	2.26556	1.63015e-10
																																	-11.7	2.29046	6.75078e-10	-11.7	2.29046	1.70148e-09	-11.7	2.29046	1.16191e-10
																																	-11.7	2.31535	4.89343e-10	-11.7	2.31535	1.14868e-09	-11.7	2.31535	8.48207e-11
																																	-11.7	2.34025	3.52347e-10	-11.7	2.34025	7.73374e-10	-11.7	2.34025	6.27625e-11
																																	-11.7	2.36515	2.52114e-10	-11.7	2.36515	5.19349e-10	-11.7	2.36515	4.66551e-11
																																	-11.7	2.39004	1.79324e-10	-11.7	2.39004	3.47907e-10	-11.7	2.39004	3.46292e-11
																																	-11.7	2.41494	1.26829e-10	-11.7	2.41494	2.32517e-10	-11.7	2.41494	2.55716e-11
																																	-11.7	2.43983	8.92162e-11	-11.7	2.43983	1.55052e-10	-11.7	2.43983	1.8751e-11
																																	-11.7	2.46473	6.2432e-11	-11.7	2.46473	1.03174e-10	-11.7	2.46473	1.36419e-11
																																	-11.7	2.48963	4.34701e-11	-11.7	2.48963	6.85111e-11	-11.7	2.48963	9.84489e-12
																																	-11.7	2.51452	3.01207e-11	-11.7	2.51452	4.54018e-11	-11.7	2.51452	7.04807e-12
																																	-11.7	2.53942	2.07727e-11	-11.7	2.53942	3.00272e-11	-11.7	2.53942	5.00683e-12
																																	-11.7	2.56432	1.42605e-11	-11.7	2.56432	1.98193e-11	-11.7	2.56432	3.53042e-12
																																	-11.7	2.58921	9.74631e-12	-11.7	2.58921	1.30552e-11	-11.7	2.58921	2.47179e-12
																																	-11.7	2.61411	6.63218e-12	-11.7	2.61411	8.582e-12	-11.7	2.61411	1.71896e-12
																																	-11.7	2.639	4.49393e-12	-11.7	2.639	5.62958e-12	-11.7	2.639	1.18775e-12
																																	-11.7	2.6639	3.03242e-12	-11.7	2.6639	3.68484e-12	-11.7	2.6639	8.15693e-13
																																	-11.7	2.6888	2.03789e-12	-11.7	2.6888	2.4065e-12	-11.7	2.6888	5.56912e-13
																																	-11.7	2.71369	1.36407e-12	-11.7	2.71369	1.56798e-12	-11.7	2.71369	3.78108e-13
																																	-11.7	2.73859	9.09465e-13	-11.7	2.73859	1.01917e-12	-11.7	2.73859	2.55338e-13
																																	-11.7	2.76349	6.04029e-13	-11.7	2.76349	6.60806e-13	-11.7	2.76349	1.71544e-13
																																	-11.7	2.78838	3.99649e-13	-11.7	2.78838	4.27352e-13	-11.7	2.78838	1.14678e-13
																																	-11.7	2.81328	2.63434e-13	-11.7	2.81328	2.75647e-13	-11.7	2.81328	7.62968e-14
																																	-11.7	2.83817	1.73006e-13	-11.7	2.83817	1.77316e-13	-11.7	2.83817	5.05266e-14
																																	-11.7	2.86307	1.13205e-13	-11.7	2.86307	1.13749e-13	-11.7	2.86307	3.33108e-14
																																	-11.7	2.88797	7.38088e-14	-11.7	2.88797	7.27668e-14	-11.7	2.88797	2.18654e-14
																																	-11.7	2.91286	4.79514e-14	-11.7	2.91286	4.64184e-14	-11.7	2.91286	1.42918e-14
																																	-11.7	2.93776	3.10429e-14	-11.7	2.93776	2.95263e-14	-11.7	2.93776	9.3029e-15
																																	-11.7	2.96266	2.00265e-14	-11.7	2.96266	1.87275e-14	-11.7	2.96266	6.03109e-15
																																	-11.7	2.98755	1.28748e-14	-11.7	2.98755	1.18441e-14	-11.7	2.98755	3.89452e-15
																																	-11.7	3.01245	8.24866e-15	-11.7	3.01245	7.4692e-15	-11.7	3.01245	2.5051e-15
																																	-11.7	3.03734	5.26674e-15	-11.7	3.03734	4.69676e-15	-11.7	3.03734	1.60524e-15
																																	-11.7	3.06224	3.35138e-15	-11.7	3.06224	2.94496e-15	-11.7	3.06224	1.02476e-15
																																	-11.7	3.08714	2.1254e-15	-11.7	3.08714	1.84129e-15	-11.7	3.08714	6.51773e-16
																																	-11.7	3.11203	1.34337e-15	-11.7	3.11203	1.14798e-15	-11.7	3.11203	4.13029e-16
																																	-11.7	3.13693	8.46243e-16	-11.7	3.13693	7.1371e-16	-11.7	3.13693	2.60791e-16
																																	-11.7	3.16183	5.31308e-16	-11.7	3.16183	4.4248e-16	-11.7	3.16183	1.64077e-16
																																	-11.7	3.18672	3.32471e-16	-11.7	3.18672	2.73563e-16	-11.7	3.18672	1.02863e-16
																																	-11.7	3.21162	2.07358e-16	-11.7	3.21162	1.68662e-16	-11.7	3.21162	6.4259e-17
																																	-11.7	3.23651	1.289e-16	-11.7	3.23651	1.037e-16	-11.7	3.23651	4.00025e-17
																																	-11.7	3.26141	7.98636e-17	-11.7	3.26141	6.35841e-17	-11.7	3.26141	2.48157e-17
																																	-11.7	3.28631	4.93191e-17	-11.7	3.28631	3.888e-17	-11.7	3.28631	1.53411e-17
																																	-11.7	3.3112	3.03566e-17	-11.7	3.3112	2.3709e-17	-11.7	3.3112	9.45115e-18
																																	-11.7	3.3361	1.86237e-17	-11.7	3.3361	1.44182e-17	-11.7	3.3361	5.80253e-18
																																	-11.7	3.361	1.13882e-17	-11.7	3.361	8.74405e-18	-11.7	3.361	3.55024e-18
																																	-11.7	3.38589	6.94095e-18	-11.7	3.38589	5.28833e-18	-11.7	3.38589	2.16477e-18
																																	-11.7	3.41079	4.21661e-18	-11.7	3.41079	3.1895e-18	-11.7	3.41079	1.31548e-18
																																	-11.7	3.43568	2.55322e-18	-11.7	3.43568	1.9183e-18	-11.7	3.43568	7.96662e-19
																																	-11.7	3.46058	1.54097e-18	-11.7	3.46058	1.15052e-18	-11.7	3.46058	4.80827e-19
																																	-11.7	3.48548	9.27005e-19	-11.7	3.48548	6.88092e-19	-11.7	3.48548	2.89222e-19
																																	-11.7	3.51037	5.55845e-19	-11.7	3.51037	4.10359e-19	-11.7	3.51037	1.73381e-19
																																	-11.7	3.53527	3.32207e-19	-11.7	3.53527	2.44026e-19	-11.7	3.53527	1.03587e-19
																																	-11.7	3.56017	1.97902e-19	-11.7	3.56017	1.44695e-19	-11.7	3.56017	6.16803e-20
																																	-11.7	3.58506	1.1751e-19	-11.7	3.58506	8.55466e-20	-11.7	3.58506	3.66036e-20
																																	-11.7	3.60996	6.95483e-20	-11.7	3.60996	5.04285e-20	-11.7	3.60996	2.16492e-20
																																	-11.7	3.63485	4.10283e-20	-11.7	3.63485	2.96389e-20	-11.7	3.63485	1.27616e-20
																																	-11.7	3.65975	2.4125e-20	-11.7	3.65975	1.7368e-20	-11.7	3.65975	7.49742e-21
																																	-11.7	3.68465	1.41396e-20	-11.7	3.68465	1.01469e-20	-11.7	3.68465	4.39004e-21
																																	-11.7	3.70954	8.26024e-21	-11.7	3.70954	5.91009e-21	-11.7	3.70954	2.56198e-21
																																	-11.7	3.73444	4.80989e-21	-11.7	3.73444	3.43186e-21	-11.7	3.73444	1.49017e-21
																																	-11.7	3.75934	2.79167e-21	-11.7	3.75934	1.98669e-21	-11.7	3.75934	8.63874e-22
																																	-11.7	3.78423	1.61502e-21	-11.7	3.78423	1.14653e-21	-11.7	3.78423	4.99141e-22
																																	-11.7	3.80913	9.31276e-22	-11.7	3.80913	6.59614e-22	-11.7	3.80913	2.87446e-22
																																	-11.7	3.83403	5.35259e-22	-11.7	3.83403	3.78299e-22	-11.7	3.83403	1.64987e-22
																																	-11.7	3.85892	3.06644e-22	-11.7	3.85892	2.16279e-22	-11.7	3.85892	9.43863e-23
																																	-11.7	3.88382	1.75101e-22	-11.7	3.88382	1.2326e-22	-11.7	3.88382	5.38186e-23
																																	-11.7	3.90871	9.96613e-23	-11.7	3.90871	7.00253e-23	-11.7	3.90871	3.05861e-23
																																	-11.7	3.93361	5.65389e-23	-11.7	3.93361	3.96556e-23	-11.7	3.93361	1.73254e-23
																																	-11.7	3.95851	3.19706e-23	-11.7	3.95851	2.23855e-23	-11.7	3.95851	9.78167e-24
																																	-11.7	3.9834	1.80192e-23	-11.7	3.9834	1.25962e-23	-11.7	3.9834	5.50446e-24
																																	-11.7	4.0083	1.01228e-23	-11.7	4.0083	7.06506e-24	-11.7	4.0083	3.08737e-24
																																	-11.7	4.0332	5.66822e-24	-11.7	4.0332	3.94998e-24	-11.7	4.0332	1.72598e-24
																																	-11.7	4.05809	3.16353e-24	-11.7	4.05809	2.20127e-24	-11.7	4.05809	9.61745e-25
																																	-11.7	4.08299	1.75985e-24	-11.7	4.08299	1.22277e-24	-11.7	4.08299	5.34144e-25
																																	-11.7	4.10788	9.75789e-25	-11.7	4.10788	6.77038e-25	-11.7	4.10788	2.95688e-25
																																	-11.7	4.13278	5.39279e-25	-11.7	4.13278	3.73655e-25	-11.7	4.13278	1.6315e-25
																																	-11.7	4.15768	2.97061e-25	-11.7	4.15768	2.0555e-25	-11.7	4.15768	8.9726e-26
																																	-11.7	4.18257	1.631e-25	-11.7	4.18257	1.12707e-25	-11.7	4.18257	4.91845e-26
																																	-11.7	4.20747	8.92557e-26	-11.7	4.20747	6.15986e-26	-11.7	4.20747	2.6873e-26
																																	-11.7	4.23236	4.86845e-26	-11.7	4.23236	3.35563e-26	-11.7	4.23236	1.46347e-26
																																	-11.7	4.25726	2.64678e-26	-11.7	4.25726	1.82205e-26	-11.7	4.25726	7.94386e-27
																																	-11.7	4.28216	1.43422e-26	-11.7	4.28216	9.86112e-27	-11.7	4.28216	4.29792e-27
																																	-11.7	4.30705	7.74616e-27	-11.7	4.30705	5.31952e-27	-11.7	4.30705	2.31775e-27
																																	-11.7	4.33195	4.1699e-27	-11.7	4.33195	2.86021e-27	-11.7	4.33195	1.24581e-27
																																	-11.7	4.35685	2.23735e-27	-11.7	4.35685	1.53285e-27	-11.7	4.35685	6.67454e-28
																																	-11.7	4.38174	1.1965e-27	-11.7	4.38174	8.18804e-28	-11.7	4.38174	3.56426e-28
																																	-11.7	4.40664	6.37757e-28	-11.7	4.40664	4.35949e-28	-11.7	4.40664	1.89713e-28
																																	-11.7	4.43154	3.38818e-28	-11.7	4.43154	2.31348e-28	-11.7	4.43154	1.00648e-28
																																	-11.7	4.45643	1.79409e-28	-11.7	4.45643	1.22369e-28	-11.7	4.45643	5.32223e-29
																																	-11.7	4.48133	9.46863e-29	-11.7	4.48133	6.45131e-29	-11.7	4.48133	2.80519e-29
																																	-11.7	4.50622	4.98076e-29	-11.7	4.50622	3.38999e-29	-11.7	4.50622	1.47371e-29
																																	-11.7	4.53112	2.61137e-29	-11.7	4.53112	1.7755e-29	-11.7	4.53112	7.71683e-30
																																	-11.7	4.55602	1.3646e-29	-11.7	4.55602	9.26865e-30	-11.7	4.55602	4.0276e-30
																																	-11.7	4.58091	7.10728e-30	-11.7	4.58091	4.82261e-30	-11.7	4.58091	2.09524e-30
																																	-11.7	4.60581	3.68949e-30	-11.7	4.60581	2.50102e-30	-11.7	4.60581	1.08642e-30
																																	-11.7	4.6307	1.90893e-30	-11.7	4.6307	1.29278e-30	-11.7	4.6307	5.61494e-31
																																	-11.7	4.6556	9.84414e-31	-11.7	4.6556	6.66039e-31	-11.7	4.6556	2.89247e-31
																																	-11.7	4.6805	5.05972e-31	-11.7	4.6805	3.42014e-31	-11.7	4.6805	1.48515e-31
																																	-11.7	4.70539	2.592e-31	-11.7	4.70539	1.75048e-31	-11.7	4.70539	7.60067e-32
																																	-11.7	4.73029	1.32344e-31	-11.7	4.73029	8.92976e-32	-11.7	4.73029	3.87713e-32
																																	-11.7	4.75519	6.73498e-32	-11.7	4.75519	4.54035e-32	-11.7	4.75519	1.97127e-32
																																	-11.7	4.78008	3.41607e-32	-11.7	4.78008	2.30095e-32	-11.7	4.78008	9.98988e-33
																																	-11.7	4.80498	1.72694e-32	-11.7	4.80498	1.16223e-32	-11.7	4.80498	5.04604e-33
																																	-11.7	4.82988	8.70136e-33	-11.7	4.82988	5.85119e-33	-11.7	4.82988	2.5405e-33
																																	-11.7	4.85477	4.36975e-33	-11.7	4.85477	2.93604e-33	-11.7	4.85477	1.27486e-33
																																	-11.7	4.87967	2.18718e-33	-11.7	4.87967	1.46841e-33	-11.7	4.87967	6.37652e-34
																																	-11.7	4.90456	1.09112e-33	-11.7	4.90456	7.3198e-34	-11.7	4.90456	3.17893e-34
																																	-11.7	4.92946	5.42522e-34	-11.7	4.92946	3.63678e-34	-11.7	4.92946	1.57962e-34
																																	-11.7	4.95436	2.68857e-34	-11.7	4.95436	1.80095e-34	-11.7	4.95436	7.82349e-35
																																	-11.7	4.97925	1.32796e-34	-11.7	4.97925	8.88894e-35	-11.7	4.97925	3.8621e-35
																																	-11.7	5.00415	6.53741e-35	-11.7	5.00415	4.37285e-35	-11.7	5.00415	1.90029e-35
																																	-11.7	5.02905	3.20763e-35	-11.7	5.02905	2.1441e-35	-11.7	5.02905	9.3195e-36
																																	-11.7	5.05394	1.56863e-35	-11.7	5.05394	1.04783e-35	-11.7	5.05394	4.55553e-36
																																	-11.7	5.07884	7.64569e-36	-11.7	5.07884	5.10387e-36	-11.7	5.07884	2.21952e-36
																																	-11.7	5.10373	3.71424e-36	-11.7	5.10373	2.47785e-36	-11.7	5.10373	1.07783e-36
																																	-11.7	5.12863	1.79838e-36	-11.7	5.12863	1.19899e-36	-11.7	5.12863	5.21696e-37
																																	-11.7	5.15353	8.67858e-37	-11.7	5.15353	5.78255e-37	-11.7	5.15353	2.51684e-37
																																	-11.7	5.17842	4.17422e-37	-11.7	5.17842	2.77964e-37	-11.7	5.17842	1.21023e-37
																																	-11.7	5.20332	2.00105e-37	-11.7	5.20332	1.33174e-37	-11.7	5.20332	5.80029e-38
																																	-11.7	5.22822	9.56094e-38	-11.7	5.22822	6.35943e-38	-11.7	5.22822	2.77079e-38
																																	-11.7	5.25311	4.55302e-38	-11.7	5.25311	3.02677e-38	-11.7	5.25311	1.31926e-38
																																	-11.7	5.27801	2.16101e-38	-11.7	5.27801	1.43583e-38	-11.7	5.27801	6.26074e-39
																																	-11.7	5.30291	1.02228e-38	-11.7	5.30291	6.78881e-39	-11.7	5.30291	2.96137e-39
																																	-11.7	5.3278	4.81997e-39	-11.7	5.3278	3.19923e-39	-11.7	5.3278	1.39614e-39
																																	-11.7	5.3527	2.26503e-39	-11.7	5.3527	1.50266e-39	-11.7	5.3527	6.56048e-40
																																	-11.7	5.37759	1.06087e-39	-11.7	5.37759	7.03463e-40	-11.7	5.37759	3.07264e-40
																																	-11.7	5.40249	4.95231e-40	-11.7	5.40249	3.28234e-40	-11.7	5.40249	1.43435e-40
																																	-11.7	5.42739	2.30415e-40	-11.7	5.42739	1.52647e-40	-11.7	5.42739	6.67374e-41
																																	-11.7	5.45228	1.0685e-40	-11.7	5.45228	7.07551e-41	-11.7	5.45228	3.09493e-41
																																	-11.7	5.47718	4.93847e-41	-11.7	5.47718	3.26881e-41	-11.7	5.47718	1.43054e-41
																																	-11.7	5.50207	2.27494e-41	-11.7	5.50207	1.50516e-41	-11.7	5.50207	6.59046e-42
																																	-11.7	5.52697	1.04449e-41	-11.7	5.52697	6.90781e-42	-11.7	5.52697	3.02621e-42
																																	-11.7	5.55187	4.77967e-42	-11.7	5.55187	3.1598e-42	-11.7	5.55187	1.385e-42
																																	-11.7	5.57676	2.17996e-42	-11.7	5.57676	1.44059e-42	-11.7	5.57676	6.31779e-43
																																	-11.7	5.60166	9.90965e-43	-11.7	5.60166	6.54611e-43	-11.7	5.60166	2.87241e-43
																																	-11.7	5.62656	4.48979e-43	-11.7	5.62656	2.96475e-43	-11.7	5.62656	1.30165e-43
																																	-11.7	5.65145	2.02746e-43	-11.7	5.65145	1.33831e-43	-11.7	5.65145	5.87904e-44
																																	-11.7	5.67635	9.12506e-44	-11.7	5.67635	6.02121e-44	-11.7	5.67635	2.64657e-44
																																	-11.7	5.70125	4.09334e-44	-11.7	5.70125	2.70006e-44	-11.7	5.70125	1.18748e-44
																																	-11.7	5.72614	1.83012e-44	-11.7	5.72614	1.20677e-44	-11.7	5.72614	5.31044e-45
																																	-11.7	5.75104	8.15525e-45	-11.7	5.75104	5.37573e-45	-11.7	5.75104	2.36701e-45
																																	-11.7	5.77593	3.62205e-45	-11.7	5.77593	2.38677e-45	-11.7	5.77593	1.05155e-45
																																	-11.7	5.80083	1.60336e-45	-11.7	5.80083	1.0562e-45	-11.7	5.80083	4.65615e-46
																																	-11.7	5.82573	7.07399e-46	-11.7	5.82573	4.65842e-46	-11.7	5.82573	2.05487e-46
																																	-11.7	5.85062	3.11069e-46	-11.7	5.85062	2.04783e-46	-11.7	5.85062	9.03867e-47
																																	-11.7	5.87552	1.36335e-46	-11.7	5.87552	8.9724e-47	-11.7	5.87552	3.96266e-47
																																	-11.7	5.90041	5.95549e-47	-11.7	5.90041	3.91818e-47	-11.7	5.90041	1.73153e-47
																																	-11.7	5.92531	2.5929e-47	-11.7	5.92531	1.70537e-47	-11.7	5.92531	7.54109e-48
																																	-11.7	5.95021	1.12515e-47	-11.7	5.95021	7.398e-48	-11.7	5.95021	3.2734e-48
																																	-11.7	5.9751	4.86627e-48	-11.7	5.9751	3.19866e-48	-11.7	5.9751	1.4162e-48
																																	-11.7	6	2.09768e-48	-11.7	6	1.37842e-48	-11.7	6	6.10677e-49
																																	-11.65	0	0.01272	-11.65	0	0.02524	-11.65	0	0.00571
																																	-11.65	0.0249	0.02815	-11.65	0.0249	0.05591	-11.65	0.0249	0.01262
																																	-11.65	0.04979	0.03883	-11.65	0.04979	0.07738	-11.65	0.04979	0.01729
																																	-11.65	0.07469	0.04571	-11.65	0.07469	0.09159	-11.65	0.07469	0.02014
																																	-11.65	0.09959	0.05012	-11.65	0.09959	0.10118	-11.65	0.09959	0.02184
																																	-11.65	0.12448	0.05269	-11.65	0.12448	0.10739	-11.65	0.12448	0.02273
																																	-11.65	0.14938	0.05381	-11.65	0.14938	0.11101	-11.65	0.14938	0.0231
																																	-11.65	0.17427	0.05369	-11.65	0.17427	0.11254	-11.65	0.17427	0.02312
																																	-11.65	0.19917	0.05244	-11.65	0.19917	0.11227	-11.65	0.19917	0.02286
																																	-11.65	0.22407	0.05008	-11.65	0.22407	0.11042	-11.65	0.22407	0.0223
																																	-11.65	0.24896	0.0467	-11.65	0.24896	0.10721	-11.65	0.24896	0.02143
																																	-11.65	0.27386	0.04246	-11.65	0.27386	0.10296	-11.65	0.27386	0.02024
																																	-11.65	0.29875	0.03766	-11.65	0.29875	0.09803	-11.65	0.29875	0.01878
																																	-11.65	0.32365	0.03269	-11.65	0.32365	0.09276	-11.65	0.32365	0.01718
																																	-11.65	0.34855	0.02793	-11.65	0.34855	0.08741	-11.65	0.34855	0.01555
																																	-11.65	0.37344	0.02365	-11.65	0.37344	0.08216	-11.65	0.37344	0.01398
																																	-11.65	0.39834	0.01994	-11.65	0.39834	0.07734	-11.65	0.39834	0.01252
																																	-11.65	0.42324	0.0167	-11.65	0.42324	0.07349	-11.65	0.42324	0.0112
																																	-11.65	0.44813	0.01373	-11.65	0.44813	0.07141	-11.65	0.44813	0.01008
																																	-11.65	0.47303	0.01085	-11.65	0.47303	0.0718	-11.65	0.47303	0.00926
																																	-11.65	0.49793	0.008	-11.65	0.49793	0.07475	-11.65	0.49793	0.0089
																																	-11.65	0.52282	0.00531	-11.65	0.52282	0.07957	-11.65	0.52282	0.0091
																																	-11.65	0.54772	0.0032	-11.65	0.54772	0.08501	-11.65	0.54772	0.00974
																																	-11.65	0.57261	0.00271	-11.65	0.57261	0.0898	-11.65	0.57261	0.01059
																																	-11.65	0.59751	0.0038	-11.65	0.59751	0.09294	-11.65	0.59751	0.0114
																																	-11.65	0.62241	0.00503	-11.65	0.62241	0.0938	-11.65	0.62241	0.01199
																																	-11.65	0.6473	0.00593	-11.65	0.6473	0.09215	-11.65	0.6473	0.01225
																																	-11.65	0.6722	0.0064	-11.65	0.6722	0.08811	-11.65	0.6722	0.01214
																																	-11.65	0.6971	0.00649	-11.65	0.6971	0.08203	-11.65	0.6971	0.01169
																																	-11.65	0.72199	0.00629	-11.65	0.72199	0.07443	-11.65	0.72199	0.01095
																																	-11.65	0.74689	0.00588	-11.65	0.74689	0.06589	-11.65	0.74689	0.00999
																																	-11.65	0.77178	0.00536	-11.65	0.77178	0.05697	-11.65	0.77178	0.0089
																																	-11.65	0.79668	0.0048	-11.65	0.79668	0.04817	-11.65	0.79668	0.00776
																																	-11.65	0.82158	0.00426	-11.65	0.82158	0.0399	-11.65	0.82158	0.00664
																																	-11.65	0.84647	0.00375	-11.65	0.84647	0.03243	-11.65	0.84647	0.00559
																																	-11.65	0.87137	0.00329	-11.65	0.87137	0.02592	-11.65	0.87137	0.00464
																																	-11.65	0.89627	0.00288	-11.65	0.89627	0.02042	-11.65	0.89627	0.00382
																																	-11.65	0.92116	0.00251	-11.65	0.92116	0.01591	-11.65	0.92116	0.00312
																																	-11.65	0.94606	0.00217	-11.65	0.94606	0.01231	-11.65	0.94606	0.00254
																																	-11.65	0.97095	0.00186	-11.65	0.97095	0.0095	-11.65	0.97095	0.00207
																																	-11.65	0.99585	0.00159	-11.65	0.99585	0.00735	-11.65	0.99585	0.00169
																																	-11.65	1.02075	0.00134	-11.65	1.02075	0.00572	-11.65	1.02075	0.00139
																																	-11.65	1.04564	0.00112	-11.65	1.04564	0.00449	-11.65	1.04564	0.00114
[truncated: 173,229 more rows]

## Sheet: Fig.6
Fig. 6(a)-ECSA										Fig. 6(b)-LSV										Fig. 6(f)-Tafel										Fig. 6(g)										Fig. 6(h)-it
[truncated: 86,403 more rows]
[truncated: 2 more columns]
